# Supplementary material for: Bacterial meta-analysis of chicken cecal microbiota
Source: PeerJ. 2021 Jan 5;9:e10571. doi: 10.7717/peerj.10571 (PMC7792525; doi:10.7717/peerj.10571)
Supplement: Supplemental Information 5 — Information includes the 16S rRNA gene hypervariable region that was sequenced, the location where the study was developed, the breed of the animals, detailed information of the sequencing technology, amplification primers, amplicon size, extraction methodology, number of samples per study, number of reads before and after quality filters, a brief description of each project and the accession numbers for the raw data as well as the digital online identifier (doi) for each article. [file peerj-09-10571-s005.xlsx]

## Sheet: TableS1
	Index	Study	16S Region	Location	Type	Breed	Forward Primer	Reverse Primer	Fragment length (Base pairs)	Sequencing Technology	Extraction Methods	No. of samples	Pre-processed	Raw reads	Quality filtered reads	Quality reads per sample (Mean)	Description and aim of the project	Accession	Article doi
	1	Mancabelli 2016	V3	Italy	Commercial	Broiler	341F	534R	NA	Illumina MiSeq	Power Viral environmental RNA/DNA kit (Mobio, USA)	84	No	10201525	2010878	23939	Effect of breeding types in the microbiota	SRP064851	doi:10.1111/1462-2920.13363
	2	Shaufi 2015	V3	Malaysia	Experimental	Cobb 500	341F	534R	330	Illumina Miseq 2X151	QIAamp DNA Stool Mini Kit (QIAGEN, Germany)	4	Yes	1830937	1654729	413682	Comparison between ilea and cecal communities	SRP048663	doi:10.1186/s13099-015-0051-7
	3	Ballou 2016	V4	USA	Experimental	Broiler	515F	806R	292	Illumina MiSeq 2X151	MO BIO Power Soil kit (MO BIO, Carlsbad, CA)	21	No	772226	772226	36773	Probiotic effect along the GIT	SRP095024	doi: 10.3389/fvets.2016.00002
	4	Costa 2017	V4	Brazil	Experimental	Cobb 500	564F	785R	NA	Illumina MiSeq	E.Z.N.A. Stool DNA Kit, Omega Bio-Tek	93	Yes	13542774	952232	10239	Antibiotic effect in cecal microbiome	SRP096720	doi:10.1371/journal.pone.0171642
	5	Xu 2016	V4	China	Experimental	Dagu	520F	802R	NA	MiSeq 2X250	TIANGEN DNA stool mini kit (TIANGEN, cat#DP328)	24	Yes	1822234	1555727	64822	Microbiota characterization of Dagu chickens	SRP078216	doi:10.1186/s12866-016-0877-2
	6	Xia 2019	V3V4	China	Experimental	Di-Gao	338F	806R	511	Illumina MiSeq	QIAamp Fast Stool Mini Kit (Qiagen).	35	No	1310025	914362	25399	Evaluation of the effect of lysozyme dietary supplementation in Broiler chickens	SRP186657	https://doi.org/10.1371/journal.pone.0216748
	7	Varmuzova 2015	V3V4	Czech Republic	Experimental	ISA brown	341F	805R	NA	Illumina Miseq 2000	QIAamp DNA Stool Mini Kit (Qiagen).	45	No	5569130	685194	14896	Evaluation of plant extracts to treat Salmonella enterica infection and the effect in bacterial composition	SRP056920	http://dx.doi.org/10.3382/ps/pev190
	8	Biasalto 2018	V3V4	Italy	Experimental	LabelHubbardHybrid	NA	NA	NA	Illumina MiSeq	DNAzol Reagent, Thermo Fisher Scientific	10	No	1427508	44879	4488	Evaluation of the effect of insect diet in free range chickens	SRP125741	https://doi.org/10.1186/s12917-018-1690-y
	9	Zhou 2016	V3V4	China	Commercial	Tibetan	338F	806R	NA	Illumina Miseq 2X300	TIANamp Stool DNA Kit (TIANGEN Biotech co., LTD, Beijing, China)	6	Yes	266826	253346	42224	Change in microbiota composition of Tibetan chickens located at different geographic regions	SRP065132	doi: 10.1002/mbo3.367
