# Supplementary material for: Bacterial meta-analysis of chicken cecal microbiota
Source: PeerJ. 2021 Jan 5;9:e10571. doi: 10.7717/peerj.10571 (PMC7792525; doi:10.7717/peerj.10571)
Supplement: Supplemental Information 6 [file peerj-09-10571-s006.xlsx]

## Sheet: TableS2
	Core 50%
	V3				V4					V3V4
	Genus	Mancabelli et al., 2016	Shaufi et al., 2015		Genus	Xu et al., 2016	Ballou et al., 2016	Costa et al., 2017		Genus	Varmuzoba et al., 2015	Zhou et al., 2016	Biasalto et al., 2018	Xia et al., 2019
	Barnesiella	35/83	3/4		Bilophila	21/24	20/21	43/93
	Parabacteroides	40/83	4/4		Dehalobacterium	21/24	17/21	41/93
	Streptococcus	46/83	4/4		cc115	24/24	20/21	56/93
	Clostridium	22/83	2/4		Anaeroplasma	18/24	10/21	21/93
	Lachnospira	25/83	2/4		Sutterella	15/24	14/21	32/93
	Butyricicoccus	42/83	3/4		Phascolarctobacterium	17/24	17/21	26/93
	Gemmiger	27/83	2/4		Coprococcus	24/24	20/21	38/93
					Megamonas	20/24	19/21	44/93
	Core 80%
	V3				V4					V3V4
	Genus	Mancabelli et al., 2016	Shaufi et al., 2015		Genus	Xu et al., 2016	Ballou et al., 2016	Costa et al., 2017		Genus	Varmuzoba et al., 2015	Zhou et al., 2016	Biasalto et al., 2018	Xia et al., 2019
	Alistipes	67/83	3/4		Ruminococcus	16/24	16/21	19/93		Coprobacillus	14/46	5/6	9/10	23/35
					Megamonas	20/24	19/21	44/93
					Helicobacter	20/24	10/21	51/93
					Coprococcus	24/24	20/21	38/93
					Lachnospiraceae - Clostridium	22/24	19/21	43/93
					cc115	24/24	20/21	56/93
					Erysipelotrichaceae - Clostridium	4/24	2/21	17/93
					Bilophila	21/24	20/21	43/93
