# Supplementary material for: Bacterial meta-analysis of chicken cecal microbiota
Source: PeerJ. 2021 Jan 5;9:e10571. doi: 10.7717/peerj.10571 (PMC7792525; doi:10.7717/peerj.10571)
Supplement: Supplemental Information 8 [file peerj-09-10571-s008.xlsx]

## Sheet: Hoja1
ASV	Sequence	Study/Region	Genus	Core microbiome
a6588f0a1ce8d4f0e5d8ce8cd65745f2	CGTTATCCGGATTTATTGGGTTTAAAGGGTGCGTAGGCGGTTTGATAAGTTAGAGGTGAAATACCGGGGCTCAACTCCGGAACTGCCTCTAATACTGTTGAACTAGAGAGTAGTTGCGGTAGGCGGAATG	Ballou	Alistipes	80% Study
be2711c79a3450f60ba899c469be5c1a	CGTTATCCGGATTTACTGGGTGTAAAGGGCGTGTAGGCGGGATTGCAAGTCAGATGTGAAAACCACGGGCTCAACCTGTGGCCTGCATTTGAAACTGCAGTTCTTGAGTACTGGAGAGGCAGACGGAATT	Ballou	Oscillospira	80% Study
e62f538a7fb595131c934f0592e3b435	CGTTGTCCGGATTTACTGGGTGTAAAGGGCGTGCAGCCGGGCTGGTAAGTCAGATGTGAAATCTGGAGGCTCAACCTCCAAACTGCATTTGAAACTGCTGGTCTTGAGTACCGGAGAGGTTATCGGAATT	Ballou	Oscillospira	80% Study
e8be6dd1b6c03442014eeb6593a918d6	CGTTATCCGGATTTACTGGGTGTAAAGGGCGTGTAGGCGGGAGTGCAAGTCAGATGTGAAAACTATGGGCTCAACCCATAGCCTGCATTTGAAACTGTACTTCTTGAGTACTGGAGAGGCAGGCGGAATT	Ballou	Oscillospira	80% Study
fe2539defb69a4be122128b34993dd7f	CGTTGTCCGGATTTACTGGGTGTAAAGGGCGTGCAGCCGGGCTGGTAAGTCAGATGTGAAATCCGTGGGCTTAACCCACGAACTGCATTTGAAACTGCTGGTCTTGAGTACCGGAGAGGTTATCGGAATT	Ballou	Oscillospira	80% Study
0d89d6f6990d6029110678f74b9b54dc	CGTTGTCCGGATTTACTGGGTGTAAAGGGCGTGTAGGCGGGATTGCAAGTCAGGCGTGAAAACCAGAGGCTCAACCTCTGGCCTGCGTTTGAAACTGCAGTTCTTGAGTACTGGAGAGGTTGGCGGAATT	Ballou	Oscillospira	80% Study
df648d93aa401623e6428f06c77193af	CGTTATCCGGATTTACTGGGTGTAAAGGGCGTGTAGGCGGGATTGCAAGTCAGACGTGAAAACTATGGGCTCAACCCATAGCCTGCGTTTGAAACTGTAGTTCTTGAGTGCTGGAGAGGCAATCGGAATT	Ballou	Oscillospira	80% Study
0d94859cf3ef18d5183fe9568fda95c4	CGTTATCCGGATTTACTGGGTGTAAAGGGCGTGTAGGCGGGACTGCAAGTCAGATGTGAAAACTATGGGCTCAACCCATAGCCTGCATTTGAAACTGTAGTTCTTGAGTGCTGGAGAGGCAATCGGAATT	Ballou	Oscillospira	80% Study
53178de637f72634d0634f6532736f99	CGTTATCCGGATTTACTGGGTGTAAAGGGCGTGTAGGCGGGATTGCAAGTCAGGCGTGAAAACTATGGGCTCAACCCATAGCCTGCGTTTGAAACTGTAGTTCTTGAGTGCTGGAGAGGCAATCGGAATT	Ballou	Oscillospira	80% Study
2008ffde204ce861deb45e83626cac71	CGTTATCCGGATTTACTGGGTGTAAAGGGCGTGTAGGCGGGACTGCAAGTCAGGTGTGAAAACCACGGGCTCAACCTGTGGCCTGCATTTGAAACTGTAGTTCTTGAGTGCTGGAGAGGCAATCGGAATT	Ballou	Oscillospira	80% Study
8009bf3d73e7101a4ef836c1dcb9cf08	CGTTATCCGGATTTACTGGGTGTAAAGGGCGTGTAGGCGGGAAGGCAAGTCAGACGTGAAAACCACGGGCTCAACCTGTGGCCTGCGTTTGAAACTGTTTTTCTTGAGTGATGGAGAGGCAGGCGGAATT	Ballou	Oscillospira	80% Study
8dcb8d6e719bbb545dde79c0b08c1383	CGTTATCCGGATTTACTGGGTGTAAAGGGCGCGTAGGCGGGATGACAAGTCAGATGTGAAAACTATGGGCTTAACCCATAGCCTGCATTTGAAACTGCCGTTCTTGAGTGCTGGAGAGGCAATCGGAATT	Ballou	Oscillospira	80% Study
333d6f7e3dd8b530bdd6c235f5e5eace	CGTTATCCGGATTTACTGGGTGTAAAGGGCGTGTAGGCGGGCTGGCAAGTCAGATGTGAAAACCATGGGCTCAACCCATGGCCTGCATTTGAAACTGTTGGTCTTGAGTGCTGGAGAGGCAATCGGAATT	Ballou	Oscillospira	80% Study
354de8fc0f17e97c7af1883d1d9d0315	CGTTATCCGGATTTACTGGGTGTAAAGGGCGTGTAGGCGGGATGGTAAGTCAGATGTGAAAACCATGGGCTCAACCCATGGCCTGCATTTGAAACTGCTGTTCTTGAGTGATGGAGAGGCAGGCGGAATT	Ballou	Oscillospira	80% Study
808a20497ea0edff897d34a827b027fd	CGTTATCCGGATTTACTGGGTGTAAAGGGCGTGTAGGCGGGAAGGCAAGTCAGATGTGAAAACTATGGGCTCAACCCATAGCCTGCATTTGAAACTGTTTTTCTTGAGTGATGGAGAGGCAGGCGGAATT	Ballou	Oscillospira	80% Study
9030217fac0c8538c9bf106733efaa91	CGTTGTCCGGATTTACTGGGTGTAAAGGGCGTGTAGGCGGGATTACAAGTCAGATGTGAAATTCCGGGGCTCAACCCCGGAACTGCATTTGAAACTGTAGTTCTTGAGTACTGGAGAGGCAGGCGGAATT	Ballou	Oscillospira	80% Study
9af19af12383f6f74b2d35f4068b27fa	CGTTGTCCGGATTTACTGGGTGTAAAGGGCGTGCAGCCGGGATTACAAGTCAGATGTGAAATCTATGGGCTCAACCCATAAATTGCATTTGAAACTGTAGTTCTTGAGTACTGGAGAGGCAGACGGAATT	Ballou	Oscillospira	80% Study
abc38c03711cde59aac43c7f9614f764	CGTTGTCCGGATTTACTGGGTGTAAAGGGCGTGCAGCCGGGCCGGCAAGTCAGATGTGAAATCTGGAGGCTTAACCTCCAAACTGCATTTGAAACTGTTGGTCTTGAGTACCGGAGAGGTTATCGGAATT	Ballou	Oscillospira	80% Study
fc8a8909fbd560819e9316e68242dbc4	CGTTGTCCGGATTTACTGGGTGTAAAGGGCGTGTAGCCGGGGAGACAAGTCAGATGTGAAATCTGGAGGCTCAACCTCCAAACTGCATTTGAAACTGTTTCTCTTGAGTATCGGAGAGGTAATCGGAATT	Ballou	Oscillospira	80% Study
620eb2370b38e902bd02b169b686d347	CGTTATCCGGATTTACTGGGTGTAAAGGGCGTGTAGGCGGGATGGCAAGTCAGATGTGAAAACCACGGGCTCAACCTGTGGCCTGCATTTGAAACTGCTGTTCTTGAGTGATGGAGAGGCAGGCGGAATT	Ballou	Oscillospira	80% Study
a1f6f2cc71b6208b92db602b89c7495a	CGTTATCCGGATTTACTGGGTGTAAAGGGCGTGTAGGCGGGCTGGCAAGTCAGGCGTGAAAACCATGGGCTCAACCCATGGCCTGCGTTTGAAACTGTTGGTCTTGAGTGCTGGAGAGGCAAGCGGAATT	Ballou	Oscillospira	80% Study
8621cd9be609e01044ac081090f53e3d	CGTTATCCGGATTTACTGGGTGTAAAGGGCGTGTAGGCGGGAGTGTAAGTCAGATGTGAAAACTATGGGCTCAACCCATAGCCTGCATTTGAAACTGCATTTCTTGAGTACTGGAGAGGCAGACGGAATT	Ballou	Oscillospira	80% Study
9ac9fde977bbd1f8b3c5a9c03385f3e3	CGTTATCCGGATTTACTGGGTGTAAAGGGCGTGTAGGCGGGACTGCAAGTCAGGCGTGAAAACCACGGGCTCAACCTGTGGCCTGCGTTTGAAACTGTAGTTCTTGAGTGATGGAGAGGCAGGCGGAATT	Ballou	Oscillospira	80% Study
921bfd97739094f13023d915ef0356db	CGTTGTCCGGATTTACTGGGTGTAAAGGGCGTGTAGGCGGGATTGCAAGTCAGATGTGAAATTCCGGGGCTCAACCCCGGAACTGCATTTGAAACTGTAGTTCTTGAGTACTGGAGAGGCAGGCGGAATT	Ballou	Oscillospira	80% Study
92816acf9f54e6b44562bd4d04485b4f	CGTTATCCGGATTTATTGGGTGTAAAGGGCGTGTAGGCGGGACTGCAAGTCAGATGTGAAAACCACGGGCTCAACCTGTGGCCTGCATTTGAAACTGTAGTTCTTGAGTGTCGGAGAGGCAATCGGAATT	Ballou	Oscillospira	80% Study
9936b73ab06966c2e590c800d503418e	CGTTATCCGGATTTACTGGGTGTAAAGGGCGTGTAGGCGGGATTGCAAGTCAGATGTGAAAACTGGGGGCTCAACCTCCAGCCTGCATTTGAAACTGTAGTTCTTGAGTGCTGGAGAGGCAATCGGAATT	Ballou	Oscillospira	80% Study
3d271cdf3b44662a0bd825357ee93e3f	CGTTATCCGGATTTACTGGGTGTAAAGGGCGTGTAGGCGGGCTTGCAAGTCAGATGTGAAAACTATGGGCTCAACCCATAGCCTGCATTTGAAACTGTAGGTCTTGAGTGCTGGAGAGGCAATCGGAATT	Ballou	Oscillospira	80% Study
5fa9039f78c54d4806c8d924e1f5c749	CGTTATCCGGATTTACTGGGTGTAAAGGGCGTGTAGGCGGGCGAGCAAGTCAGATGTGAAATTCCAGGGCTCAACCCTGGAACTGCATTTGAAACTGTTGGTCTTGAGTGCTGGAGAGGCAATCGGAATT	Ballou	Oscillospira	80% Study
fe2f7a417ca4bc24db75a97af047edfc	CGTTGTCCGGATTTACTGGGTGTAAAGGGCGTGTAGGCGGGATTGCAAGTCAGATGTGAAATTCCGGGGCTCAACCCCGGACCTGCATTTGAAACTGTAGTTCTTGAGTACTGGAGAGGCAGGCGGAATT	Ballou	Oscillospira	80% Study
83bfd6d673372dcebb1a677beca68ab1	CGTTGTCCGGATTTACTGGGTGTAAAGGGCGTGCAGCCGGGCCTGTAAGTCAGATGTGAAATCCGTGGGCTTAACCCACGAACTGCATTTGAAACTGCGGGTCTTGAGTACTGGAGAGGCAGACGGAATT	Ballou	Oscillospira	80% Study
6f1016c3df3931676a8f62cea1ff4306	CGTTATCCGGATTTACTGGGTGTAAAGGGCGTGTAGGCGGGATTGTAAGTCAGATGTGAAAACCAGGGGCTCAACCTCTGGCCTGCATTTGAAACTGCAGTTCTTGAGTACTGGAGAGGCAGACGGAATT	Ballou	Oscillospira	80% Study
ec359ef5d2ef798df7b4e4ee5e242820	CGTTATCCGGATTTACTGGGTGTAAAGGGCGTGTAGGCGGGCTGGCAAGTCAGATGTGAAAACCAGGGGCTCAACCTCTGGCCTGCATTTGAAACTGCTGGTCTTGAGTGCTGGAGAGGCAATCGGAATT	Ballou	Oscillospira	80% Study
d78c691866aa036650ce1ec45e76d2ce	CGTTATCCGGATTTACTGGGTGTAAAGGGCGTGTAGGCGGGATGGTAAGTCAGATGTGAAAACTATGGGCTCAACTCATAGCCTGCATTTGAAACTGCTGTTCTTGAGTACTGGAGAGGCAGACGGAATT	Ballou	Oscillospira	80% Study
e17e0bb87561dfc574f4d69004b1395d	CGTTGTCCGGATTTACTGGGTGTAAAGGGCGTGTAGCCGGGAGTACAAGTCAGATGTGAAATGCCGAGGCTCAACCTCGGAGCTGCATTTGAAACTGTATTTCTTGAGTACTGGAGAGGCAGACGGAATT	Ballou	Oscillospira	80% Study
bf09c874be482813ed4ee88720a572a6	CGTTATCCGGATTTACTGGGTGTAAAGGGCGTGTAGGCGGGATTGCAAGTCAGATGTGAAAACCACGGGCTCAACCTGTGCCCTGCATTTGAAACTGCAGTTCTTGAGTACTGGAGAGGCAGACGGAATT	Ballou	Oscillospira	80% Study
fdb879447526d3cbcbc19735ee78a7b5	CAATGGGCGCAAGCCTGACCCAGCAACGCCGCGTGAAGGAAGAAGGCCCTCGGGTTGTAAACTTCTTTTGTCAGGGACGAAGCAAGTGACGGTACCTGACGAATAAGCCACGGCTAACTACGTGCCAGCA	Ballou	Oscillospira	80% Study
82da4148485d6eb448efa10e42ec1d47	CAATGGGCGCAAGCCTGACCCAGCAACGCCGCGTGAAGGAAGAAGGCTTTCGGGTTGTAAACTTCTTTTGTCAGGGAACAGTAGAAGAGGGTACCTGACGAATAAGCCACGGCTAACTACGTGCCAGCAG	Ballou	Oscillospira	80% Study
d7ff55a70157b9e88fa3cb92636e1cf6	CAATGGGCGAAAGCCTGACCCAGCAACGCCGCGTGAAGGAAGAAGGCTTTCGGGTTGTAAACTTCTTTTATCAGGGACGAAGGATGTGACGGTACCTGATGAATAAGCCACGGCTAACTACGTGCCAGCA	Ballou	Oscillospira	80% Study
e8848b3dc781ce19d2bd7bce9c4fdd7a	CAATGGGCGCAAGCCTGACCCAGCAACGCCGCGTGAAGGAAGAAGGCTTTCGGGTTGTAAACTTCTTTTGTCAGGGACGAACAAATGACGGTACCTGACGAATAAGCCACGGCTAACTACGTGCCAGCAG	Ballou	Oscillospira	80% Study
968dfccd3413010d45f277037c37f70f	CAATGGGCGCAAGCCTGACCCAGCAACGCCGCGTGAAGGAAGAAGGCTTTCGGGTTGTAAACTTCTTTTGTCAGGGAACAGTAGAAGAGGGTACCTGACGAATAAGCTCCGGCTAACTACGTGCCAGCAG	Ballou	Oscillospira	80% Study
f1dc1342e68dbf404ee037deacbe7b93	CAATGGGCGCAAGCCTGACCCAGCAACGCCGCGTGAAGGAAGAAGGCTTTCGGGTTGTAAACTTCTTTTGTCAGGGAAGAGGAGAAGACTGTACCTGACGAATAAGCTCCGGCTAACTACGTGCCAGCAG	Ballou	Oscillospira	80% Study
fa1815ef7d6a72eb8e6a6060b3960f31	CAATGGGCGCAAGCCTGACCCAGCAACGCCGCGTGAAGGAAGAAGGCTTTCGGGTTGTAAACTTCTTTTATTCGGGACGATAGTGACGGTACCGAATGAATAAGCCACGGCTAACTACGTGCCAGCAGCC	Ballou	Oscillospira	80% Study
078e7befe5ed38e1d46644bb93805858	CAATGGGCGAAAGCCTGACCCAGCAACGCCGCGTGAAGGAAGAAGGCTTTCGGGTTGTAAACTTCTTTTATCAGGGACGAAGTAGTGACGGTACCTGATGAATAAGCTCCGGCTAACTACGTGCCAGCAG	Ballou	Oscillospira	80% Study
50c6ad36b44679ed3432f29cae3aeaf9	CAATGGGCGCAAGCCTGACCCAGCAACGCCGCGTGAAGGAAGAAGGCTTTCGGGTTGTAAACTTCTTTTCTTAGGGACGAAGGAAGTGACGGTACCTAAGGAATAAGCTCCGGCTAACTACGTGCCAGCA	Ballou	Oscillospira	80% Study
883c45fb8e42f84d665cbfe49b27972c	CAATGGGCGCAAGCCTGACCCAGCAACGCCGCGTGAAGGAAGAAGGCTTTCGGGTTGTAAACTTCTTTTCTTGGGGACGAAACAAATGACGGTACCTAAGGAATAAGCTCCGGCTAACTACGTGCCAGCA	Ballou	Oscillospira	80% Study
833c369f9867ad1ae128212a3f5d3439	CAATGGGCGCAAGCCTGACCCAGCAACGCCGCGTGAAGGAAGAAGGCTTTCGGGTTGTAAACTTCTTTTGTCAGGGAAGATGAAAGAGACTGTACCTGACGAATAAGCCACGGCTAACTACGTGCCAGCA	Ballou	Oscillospira	80% Study
a2de5a82fbe20bd5a562892b3260b387	CAATGGACGCAAGTCTGACCCAGCAACGCCGCGTGAAGGAAGAAGGCTTTCGGGTTGTAAACTTCTTTTGTCAGGGAACAGTAGAAGAGGGTACCTGACGAATAAGCCACGGCTAACTACGTGCCAGCAG	Ballou	Oscillospira	80% Study
1039e01fbbd09d024e085c66093311ef	CAATGGGCGCAAGCCTGACCCAGCAACGCCGCGTGAAGGAAGAAGGCTTTCGGGTTGTAAACTTCTTTTATTCGGGACGAAGCAAGTGACGGTACCGAATGAATAAGCCACGGCTAACTACGTGCCAGCA	Ballou	Oscillospira	80% Study
6013f2d680276a29488635d7857b5d11	CAATGGGCGCAAGCCTGACCCAGCAACGCCGCGTGAAGGAAGAAGGCTTTCGGGTTGTAAACTTCTTTTGTCAGGGAAGATGAACGAGACTGTACCTGACGAATAAGCCACGGCTAACTACGTGCCAGCA	Ballou	Oscillospira	80% Study
d7d4f0c2fdbd31b95da3baeba3b6ae5d	CGTTATCCGGATTTACTGGGTGTAAAGGGCGTGTAGGCGGGACTGCAAGTCAGGCGTGAAAACCACGGGCTCAACCTGTGGCCTGCGTTTGAAACTGCAGTTCTTGAGTGATGGAGAGGCAGGCGGAATT	Ballou	Oscillospira	80% Study
da99a84311eefd9d6a46905404edca1a	CGTTATCCGGATTTACTGGGTGTAAAGGGCGTGTAGGCGGGATTGCAAGTCAGATGTGAAAACCACGGGCTCAACCTGTGGCCTGCATTTGAAACTGCAGTTCTTGAGTGCTGGAGAGGCAGACGGAATT	Ballou	Oscillospira	80% Study
f7c9235860a6c9daf4570a2bf357ebbd	CGTTGTCCGGATTTACTGGGTGTAAAGGGCGTGCAGCCGGGCTGGCAAGTCAGATGTGAAATCCAGAGGCTTAACCTCTGAACTGCATTTGAAACTGCTGGTCTTGAGTACCGGAGAGGTTATCGGAATT	Ballou	Oscillospira	80% Study
b6d45c6327292eccff0268c8fa839a76	CGTTATCCGGATTTACTGGGTGTAAAGGGCGTGTAGGCGGGATTGCAAGTCAGATGTGAAAACCACGGGCTCAACCTGTGGCCTGCATTTGAAACTGTAGTTCTTGAGTGATGGAGAGGCAGGCGGAATT	Ballou	Oscillospira	80% Study
fc7014a3edab6f6a3bedc4a7b5701b6f	CGTTATCCGGATTTACTGGGTGTAAAGGGCGTGTAGGCGGGACTGCAAGTCAGATGTGAAAACCAGGGGCTCAACCTCTGGCCTGCATTTGAAACTGTAGTTCTTGAGTGCTGGAGAGGCAATCGGAATT	Ballou	Oscillospira	80% Study
f1c0fda6449647a023d7ce7bc2f5d5c3	CGTTGTCCGGATTTACTGGGTGTAAAGGGTGCGTAGGCGGTTTGGTAAGTCAGAAGTGAAATCCATGGGCTTAACCCATGAACTGCTTTTGAAACTATCGAACTTGAGTGAAGTAGAGGTAGGCGGAATT	Ballou	Ruminococcus	80% Study
dd5ff8896121b226439118b00f79c9b8	CGTTGTCCGGATTTACTGGGTGTAAAGGGTGCGTAGGCGGCTCTGCAAGTCAGTCGTGAAAACCATGGGCTCAACCCGTGGACTGCGATTGAAACTGTGGAACTTGAGTGAAGTAGAGGCAGGCGGAATT	Ballou	Ruminococcus	80% Study
9ff8d63d92a5fdf9df4b8f96890b381f	CGTTGTCCGGATTTACTGGGTGTAAAGGGTGCGTAGGCGGAAGAGCAAGTCAGTAGTGAAATCTGGGGGCTTAACCCCCAAACTGCTATTGAAACTGTTCTTCTTGAGTGGAGTAGAGGTAGGCGGAATT	Ballou	Ruminococcus	80% Study
a7c3bef8f228e23554fac1d014b663d1	CGTTATCCGGAATTACTGGGTGTAAAGGGAGTGTAGGCGGGACTGCAAGTCAGATGTGAAAATTATGGGCTCAACTCATAACCTGCATTTGAAACTGTAGTTCTTGAGTGAAGTAGAGGTAAGCGGAATT	Ballou	Ruminococcus	80% Study
802409c17b23c334018808d1a0136f0a	CGTTGTCCGGATTTACTGGGTGTAAAGGGTGCGTAGGCGGATCTGCAAGTCAGTAGTGAAATCCCAGGGCTTAACCCTGGAACTGCTATTGAAACTGTGGGTCTTGAGTGAGGTAGAGGCAGGCGGAATT	Ballou	Ruminococcus	80% Study
71219bf18bb3f32628c83c953474232e	CGTTGTCCGGAATTACTGGGTGTAAAGGGAGTGTAGGCGGGACTGCAAGTCAGGTGTGAAAACTATGGGCTTAACCCATAGACTGCACTTGAAACTGCGGTTCTTGAGTGAAGTAGAGGTAAGCGGAATT	Ballou	Ruminococcus	80% Study
a1c1c2a2db0bfe8dcbe744d97fc6b727	CGTTGTCCGGAATTACTGGGTGTAAAGGGAGCGTAGGCGGGAGTGCAAGTCGGCTGTCTAAACTATGGGCTCAACCCATAATCGCGGCCGAAACTGTATTTCTTGAGTGAAGTAGAGGTAAGCGGAATTC	Ballou	Ruminococcus	80% Study
b0c851d1c564c9418aa812001f875b47	CGTTGTCCGGATTTACTGGGTGTAAAGGGTGCGTAGGCGGCTCGGCAAGTCAGAGGTGAAATCCATGGGCTTAACCCATGAACTGCCTTTGAAACTGCCGAACTTGAGTGAAGTAGAGGTAGGCGGAATT	Ballou	Ruminococcus	80% Study
fc20109ec1afe472817b68676cf0aaa5	CGTTGTCCGGATTTACTGGGTGTAAAGGGTGCGTAGGCGGACTGGCAAGTCAGTGGTGAAAACTATGGGCTTAACCCATAGACTGCCATTGAAACTGTTGGTCTTGAGTGAAGTAGAGGCAGGCGGAATT	Ballou	Ruminococcus	80% Study
58e012bacd3f6ce917033185e8821417	CGTTGTCCGGATTTACTGGGTGTAAAGGGTGCGTAGGCGGCAGAGCAAGTCAGGCGTGAAAGCCATGGGCTTAACCCATGAACTGCGCTTGAAACTGTTCTGCTTGAGTGAAGTAGAGGCAGGCGGAATT	Ballou	Ruminococcus	80% Study
97d09fe7bc3cc778d5bd70311df2674a	CGTTGTCCGGATTTACTGGGTGTAAAGGGTGCGCAGGCGGCCAGGCAAGTCAGGCGTGAAAACTGTGGGCTTAACCCGCAGACTGCGTTTGAAACTGCATGGCTTGAGTGAAGTAGAGGCAGGCGGAATT	Ballou	Ruminococcus	80% Study
39103f3003e1bd0a0c9dd8d2935682bc	CGTTGTCCGGATTTACTGGGTGTAAAGGGTGCGTAGGCGGAAGAGCAAGTCAGTAGTGAAATCTGGGGGCTTAACTCCCAAACTGCTATTGAAACTGTTCTTCTTGAGTGGAGTAGAGGTAGGCGGAATT	Ballou	Ruminococcus	80% Study
f33521174d62a61c42c942c820fb37f9	CGTTGTCCGGATTTACTGGGTGTAAAGGGTGCGTAGGCGGATTGGCAAGTCAGAAGTGAAATCCATGGGCTTAACCCATGAACTGCTTTTGAAACTGTTAATCTTGAGTGAAGTAGAGGTAGGCGGAATT	Ballou	Ruminococcus	80% Study
82ff7e6570e383e311d6a3d155928ae5	CGTTGTCCGGATTTACTGGGTGTAAAGGGTGCGTAGGCGGCTCTGCAAGTCAGTCGTGAAAACCACGGGCTCAACCCGTGGACTGCGATTGAAACTGTGGAACTTGAGTGAAGTAGAGGCAGGCGGAATT	Ballou	Ruminococcus	80% Study
7a37ad7a47c6e0aa39b1f02847db5141	CGTTGTCCGGATTTACTGGGTGTAAAGGGTGCGTAGGCGGTTTTGCAAGTCAGGAGTGAAATCCATGGGCTTAACCCATGAACTGCTTTTGAAACTGCAAGACTTGAGTGAAGTAGAGGTAGGCGGAATT	Ballou	Ruminococcus	80% Study
7099cb7b50b27f36291881b1014f988a	CGTTGTCCGGATTTACTGGGTGTAAAGGGTGCGTAGGCGGCTCGGCAAGTCAGAGGTGAAATCCATGGGCTTAACCCATGAACTGCCTTTGAAACTGTCGAACTTGAGTGAAGTAGAGGTAGGCGGAATT	Ballou	Ruminococcus	80% Study
d8bb7e014207c48dd15b3ddc041c9e0b	CGTTGTCCGGATTTACTGGGTGTAAAGGGTGCGTAGGCGGAAGAGCAAGTCAGTAGTGAAATCTATGGGCTTAACCCATAAACTGCTATTGAAACTGTTCTTCTTGAGTGAAGTAGAGGTAGGCGGAATT	Ballou	Ruminococcus	80% Study
841158a99a3fdd2e18954d1da28f9213	CGTTGTCCGGAATTACTGGGTGTAAAGGGTGCGTAGGCGGCAGAGCAAGTCAGATGTGAAATACACGGGCTTAACCCGTGGGCTGCATTTGAAACTGTTCAGCTTGAGTGGAGCAGAGGCAGGCGGAATT	Ballou	Ruminococcus	80% Study
433314e82d959ef685fef24684a60646	CGTTGTCCGGAATTACTGGGTGTAAAGGGTGCGTAGGCGGCTCTGCAAGTCAGGCGTGAAATCCCGGGGCTTAACCCCGCGGACTGCGCTTGAAACTGTGGAGCTTGAGTGAAGTAGAGGTAGGCGGAAT	Ballou	Ruminococcus	80% Study
b4e59467d2a3412be7ab48d82ce202b0	CGTTGTCCGGAATTACTGGGTGTAAAGGGAGTGTAGGCGGGACTGCAAGTCAGGTGTGAAAACTATGGGCTTAACCCATAGACTGCACTTGAAACTGTAGTTCTTGAGTGAAGTAGAGGTAAGCGGAATT	Ballou	Ruminococcus	80% Study
1c91a4ad8f555daeae391cd1c2f719ec	CGTTGTCCGGATTTACTGGGTGTAAAGGGTGCGTAGGCGGAAGAGCAAGTCAGTAGTGAAATCTGGGGGCTTAACCCCCAAACTGCTATTGAAACTGTTTTTCTTGAGTGGAGTAGAGGTAGGCGGAATT	Ballou	Ruminococcus	80% Study
a1b9646300bf832d3f75abaa935aeafb	CGTTGTCCGGATTTACTGGGTGTAAAGGGTGCGTAGGCGGCAGAGCAAGTCAGGCGTGAAAACTATGGGCTTAACCCATAGCCTGCGTTTGAAACTGTTCAGCTTGAGTGAAGTAGAGGCAGATGGAATT	Ballou	Ruminococcus	80% Study
0e41f6c0802d1c283c944619ab321fea	CGTTGTCCGGATTTACTGGGTGTAAAGGGTGCGTAGGCGGCCATGCAAGTCAGGTGTGAAAACCCGGGGCTTAACCCCGGGACTGCATTTGAAACTGTGTGGCTTGAGTGAAGTAGAGGCAGGCGGAATT	Ballou	Ruminococcus	80% Study
1230e5c5b9aa8f0dce23b0aff1b1781b	CGTTGTCCGGAATTACTGGGTGTAAAGGGTGCGTAGGCGGCTGTGCAAGTCAGGCGTGAAATGCAGGGGCTTAACCCCTGAGCTGCGTTTGAAACTGCACGGCTTGAGTGAAGTAGAGGTAGGCGGAATT	Ballou	Ruminococcus	80% Study
9e5d8d9b0903e4c1570a290c07f40c0d	CGTTGTCCGGAATTACTGGGTGTAAAGGGTGCGTAGGCGGGACAGCAAGTCAGGCGTGAAATCCATCGGCTTAACCGGTGAACTGCGCTTGAAACTGTAGTTCTTGAGTGAAGTAGAGGCAGGCGGAATT	Ballou	Ruminococcus	80% Study
4a8c5b18e7e129dfccd26b3afb5bf68f	CGTTGTCCGGATTTACTGGGTGTAAAGGGTGCGTAGGCGGATTTTCAAGTCAGTAGTGAAATGCAGGGGCTTAACCCCTGAGCTGCTATTGAAACTGAGAGTCTTGAGTGGAGTAGAGGCAGGCGGAATT	Ballou	Ruminococcus	80% Study
5a90c48c203f122888c94541e8835cde	CGTTGTCCGGATTTACTGGGTGTAAAGGGTGCGTAGGCGGCTAGGCAAGTCAGAAGTGAAATCCATGGGCTTAACCCATGAACTGCTTTTGAAACTGCTTAGCTTGAGTGAAGTAGAGGTAGGCGGAATT	Ballou	Ruminococcus	80% Study
2d76d6b1e0c9ee41065144653e54415d	CGTTGTCCGGATTTACTGGGTGTAAAGGGTGCGTAGGCGGGATGGCAAGTCAGATGTGAAATACCGGGGCTTAACCCCGGGGCTGCATTTGAAACTGTCGTTCTTGAGTGAAGTAGAGGCAGGCGGAATT	Ballou	Ruminococcus	80% Study
6c94cc15620bd5f245af48a65f10ecbf	CGTTGTCCGGAATTACTGGGTGTAAAGGGTGCGTAGGCGGTTTGGTAAGTCAGAAGTGAAATCCATGGGCTTAACCCATGAACTGCTTTTGAAACTATCGGACTTGAGTGAAGTAGAGGTAGGCGGAATT	Ballou	Ruminococcus	80% Study
a74e1c5d5d4b2d8edf62db3318583ca4	CGTTGTCCGGATTTACTGGGTGTAAAGGGTGCGTAGGCGGAAGAGCAAGTCAGTAGTGAAATCTATGGGCTTAACCCATAAACTGCTATTGAAACTGTTTTTCTTGAGTGAAGTAGAGGTAGGCGGAATT	Ballou	Ruminococcus	80% Study
525a1bcaef0566fe4d5ae379025a64cd	CGTTGTCCGGAATTACTGGGTGTAAAGGGAGCGTAGGCGGGAGATCAAGTCAGATGTGAAAACTACGGGCTCAACCCGTAACCTGCATTTGAAACTGGTTTTCTTGAGTGAAGTAGAGGCAGGCGGAATT	Ballou	Ruminococcus	80% Study
7b2d7ba4ccddf4b030a65125fefb70f7	CGTTGTCCGGAATTACTGGGTGTAAAGGGTGCGTAGGCGGGATGGCAAGTCAGGCGTGAAATACCGGGGCTTAACTCCGGGGCTGCGCTTGAAACTGTCGTTCTTGAGTGAAGTAGAGGCAGGCGGAATT	Ballou	Ruminococcus	80% Study
e496ccfb8c90b7e7d238337b32f9e405	CGTTGTCCGGAATTACTGGGTGTAAAGGGTGCGTAGGCGGCTTTGCAAGTCAGTTGTGAAATCTATGGGCTTAACCCATAGCCTGCAATTGAAACTGTAGAGCTTGAGTGAAGTAGAGGTAGGCGGAATT	Ballou	Ruminococcus	80% Study
76220798249ea97e03c1ed990f2bf435	CGTTGTCCGGATTTACTGGGTGTAAAGGGTGCGTAGGCGGCTCGGCAAGTCAGAGGTGAAATCCATGGGCTTAACCCATGAACTGCCTTTGAAACTGCCGGACTTGAGTGAAGTAGAGGTAGGCGGAATT	Ballou	Ruminococcus	80% Study
fc63eeabc1e8e36d94b88e40ec3fad29	CGTTATCCGGATTTACTGGGTGTAAAGGGAGCGTAGACGGAGAGGCAAGTCTGATGTGAAAGGCCGGGGCTCAACCCCGGGACTGCATTGGAAACTGTTTATCTAGAGTGTCGGAGAGGCAAGTGGAATT	Ballou	Ruminococcus	80% Study
a86fb20d6d0a1b5841f7254ed307b454	CGTTGTCTGGATTTACTGGGTGTAAAGGGTGCGTAGGCGGTTTGGTAAGTCAGAAGTGAAATCCATGGGCTTAACCCATGAACTGCTTTTGAAACTATCGAACTTGAGTGAAGTAGAGGTAGGCGGAATT	Ballou	Ruminococcus	80% Study
97801f2f85e8e7b95181e56ea303fb82	CGTTGTCCGGATTTACTGGGTGTAAAGGGTGCGTAGGCGGATTGGCAAGTCAGTAGTGAAATCCATGGGCTTAACCCATGACGTGCTATTGAAACTGTTGATCTTGAGTGAAGTAGAGGTAAGCGGAATT	Ballou	Ruminococcus	80% Study
c3044027801db59b9364a8ac18e1b0b8	CGTTGTCCGGAATTACTGGGTGTAAAGGGAGCGTAGGCGGGAGTGCAAGTCGGCTGTTTAAACTATGGGCTCAACCCATAATCGCGGCCGAAACTGTATTTCTTGAGTGAAGTAGAGGTAAGCGGAATTC	Ballou	Ruminococcus	80% Study
a32fb61f5220f7e7d0a9fbb57494801b	CGTTATCCGGATTTACTGGGTGTAAAGGGAGCGTAGACGGATAGGCAAGTCTGGAGTGAAAACCCGGGGCTCAACCCCGGGACTGCTTTGGAAACTGTTTATCTAGAGTGCTGGAGAGGTAAGTGGAATT	Ballou	Ruminococcus	80% Study
8be0ae04b07e985e2763f297d39f6ba1	CGTTGTCCGGATTTACTGGGTGTAAAGGGTGCGTAGGCGGACTGGCAAGTCAGTGGTGAAAACTATGGGCTTAACCCATAGACTGCCATTGAAACTGTTGGTCTTGAGTGAAGTAGAGGTAGGCGGAATT	Ballou	Ruminococcus	80% Study
c1e4515a8b2a7f71101806361d0645c2	CGTTGTCCGGAATTACTGGGTGTAAAGGGTGCGTAGGCGGGATGGCAAGTCAGATGTGAAATACCGGGGCTTAACCCCGGGGCTGCATTTGAAACTGTCGTTCTTGAGTGAAGTAGAGGCAGGCGGAATT	Ballou	Ruminococcus	80% Study
c32c731278cfa422293a8ab8e6c39f08	CGTTATCCGGATTTACTGGGTGTAAAGGGAGCGTAGACGGAGAAGCAAGTCTGGAGTGAAAACCCGGGGCTCAACCCCGGGACTGCTTTGGAAACTGTTTTTCTAGAGTGCCGGAGAGGTAAGCGGAATT	Ballou	Ruminococcus	80% Study
6993f69d5797aad0c56d1997c8a3700e	CGTTGTCCGGAATTACTGGGTGTAAAGGGAGCGTAGGCGGGAGATCAAGTCAGATGTGAAAACTATGGGCTCAACCCATAACCTGCATTTGAAACTGGTTTTCTTGAGTGAAGTAGAGGCAGGCGGAATT	Ballou	Ruminococcus	80% Study
0211b4ca7f53205891c49ade94d36d94	CAATGGGGGAAACCCTGAACCAGCAACGCCGCGTGAGGGAAGACGGTTTTCGGATTGTAAACCTCTGTCCTCTGTGAAAATGATGATGGTAGCAGAGGAGGAAGCTCCGGCTAACTACGTGCCAGCAGCC	Ballou	Ruminococcus	80% Study
4eeab1d497ace72b8d77ce13a09bb3b6	CGTTGTCCGGATTTACTGGGTGTAAAGGGTGCGTAGGCGGAAAGGCAAGTCAGTAGTGAAATCTATGGGCTTAACCCATAAACTGCTATTGAAACTGTTTTTCTTGAGTGAAGTAGAGGTAGGCGGAATT	Ballou	Ruminococcus	80% Study
b8b973b75bd7ecc1104393ecce94cd35	CGTTATCCGGATTTACTGGGTGTAAAGGGAGCGTAGACGGATAGGCAAGTCTGGAGTGAAAACCCGGGGCTCAACCCCGGGACTGCTTTGGAAACTGTTTATCTAGAGTGCTGGAGAGGCAAGTGGAATT	Ballou	Ruminococcus	80% Study
edbb22ae5749229a533620f513577f76	CGTTGTCCGGAATTACTGGGTGTAAAGGGAGCGCAGGCGGGTCTGCAAGTTGGAAGTGAAACCCATGGGCTCAACCCATGAACTGCTTTCAAAACTGCGGATCTTGAGTGGTGTAGAGGTAGGCGGAATT	Ballou	Faecalibacterium	80% Study
2f25595bf5bf2079fbb004b7cdd9f97f	CGTTGTCCGGAATTACTGGGTGTAAAGGGAGCGCAGGCGGGAGAGCAAGTTGGGAGTGAAATCTATGGGCTCAACCCATAAATTGCTTTCAAAACTGCTTTTCTTGAGTAGTGCAGAGGTAGGCGGAATT	Ballou	Faecalibacterium	80% Study
a4020fe7ec28c1d0950f6945c4176662	CGTTGTCCGGAATTACTGGGTGTAAAGGGAGCGCAGGCGGGTATGCAAGTTGGGAGTGAAATACATGGGCTCAACCCATGAACTGCTCTCAAAACTGTGTATCTTGAGTAGTGCAGAGGTAGGCGGAATT	Ballou	Faecalibacterium	80% Study
2accf5dc4a713fc9c8aa7e46bf35bf35	CGTTGTCCGGAATTACTGGGTGTAAAGGGAGCGCAGGCGGGTCTGCAAGTTGGAAGTGAAACTCATGGGCTCAACCCATGAACTGCTTTCAAAACTGCGGATCTTGAGTGGTGTAGAGGTAGGCGGAATT	Ballou	Faecalibacterium	80% Study
154600a449b7678ea1f492e69d6d24f3	CGTTGTCCGGAATTACTGGGTGTAAAGGGAGCGCAGGCGGGTATGCAAGTTGGGAGTGAAATACATGGGCTCAACCCATGAACTGCTTTCAAAACTGTGTATCTTGAGTAGTGCAGAGGTAGGCGGAATT	Ballou	Faecalibacterium	80% Study
399f10c9848784ef8d5b3ebd34ea8ed1	CGTTGTCCGGAATTACTGGGTGTAAAGGGAGCGCAGGCGGGGCGGCAAGTTGGAAGTGAAATCTATGGGCTCAACCCATAAACTGCTTTCAAAACTGCTGGTCTTGAGTAGTGCAGAGGTAGGCGGAATT	Ballou	Faecalibacterium	80% Study
9a412458a6dc5697a88c3cb511c15d74	CAATGGGGGAAACCCTGATGCAGCGACGCCGCGTGGAGGAAGAAGGTCTTCGGATTGTAAACTCCTGTTGTTGGGGAAAAGAAGGATGGTACCCAACAAGGAAGTGACGGCTAACTACGTGCCAGCAGCC	Ballou	Faecalibacterium	80% Study
ac4bf7183c04f14dfe5ff5b33f9e199a	CAATGGGGGAAACCCTGATGCAGCGACGCCGCGTGGAGGAAGAAGGTCTTCGGATTGTAAACTCCTGTTGTTGAGGAAAAAGAGGATGGTACTCAACAAGGAAGTGACGGCTAACTACGTGCCAGCAGCC	Ballou	Faecalibacterium	80% Study
4f363419a78a771969b7790a4691fc16	CAATGGGGGAAACCCTGATGCAGCGACGCCGCGTGGAGGAAGAAGGTCTTCGGATTGTAAACTCCTGTTGTTGGGGAAAAAGAGGATGGTACCCAACAAGGAAGTGACGGCTAACTACGTGCCAGCAGCC	Ballou	Faecalibacterium	80% Study
f5dece119bc11fb9f139b9350ac46525	CGTTGTCCGGAATTACTGGGTGTAAAGGGAGCGCAGGCGGGAATGCAAGTTGGGAGTGAAATCTACGGGCTCAACCCGTAAACTGCTCTCAAAACTGTATTTCTTGAGTAGTGCAGAGGTAGGCGGAATT	Ballou	Faecalibacterium	80% Study
998d15c599c560b491f53dfd213f7ca4	CGTTGTCCGGATTTATTGGGCGTAAAGGGAACGCAGGCGGTCTTTTAAGTCTGATGTGAAAGCCTTCGGCTTAACCGGAGTAGTGCATTGGAAACTGGAAGACTTGAGTGCAGAAGAGGAGAGTGGAACT	Ballou	Lactobacillus	80% Study
9c98cb8af0742077f34c1eb7a93a7838	CGTTGTCCGGATTTATTGGGCGTAAAGCGAGCGCAGGCGGAAGAATAAGTCTGATGTGAAAGCCCTCGGCTTAACCGAGGAACTGCATCGGAAACTGTTTTTCTTGAGTGCAGAAGAGGAGAGTGGAACT	Ballou	Lactobacillus	80% Study
90025c3cab5ec3356224baf31ecd7093	CGTTGTCCGGATTTATTGGGCGTAAAGCGAGTGCAGGCGGTTCAATAAGTCTGATGTGAAAGCCTTCGGCTCAACCGGAGAATTGCATCAGAAACTGTTGAACTTGAGTGCAGAAGAGGAGAGTGGAACT	Ballou	Lactobacillus	80% Study
ca43088619a28a47665925e50187f841	CGTTATCCGGATTTATTGGGCGTAAAGCGAGCGCAGGCGGTTGCTTAGGTCTGATGTGAAAGCCTTCGGCTTAACCGAAGAAGTGCATCGGAAACCGGGCGACTTGAGTGCAGAAGAGGACAGTGGAACT	Ballou	Lactobacillus	80% Study
6b0614734bf85d4534ff53d9ee3001b0	CGTTATCCGGATTTATTGGGCGTAAAGCGAGCGCAGGCGGTTTTCTAAGTCTGATGTGAAAGCCTTCGGCTTAACCGAAGAAGTGCATCGGAAACTGGATGACTTGAGTGCAGAAGAGGGCAGTGGAACT	Ballou	Lactobacillus	80% Study
32ed93d7e6251f9abddeef8b61ba9554	CGTTATCCGGATTTATTGGGCGTAAAGCGAGCGCAGGCGGTTGCTTAGGTCTGATGTGAAAGCCTTCGGCTTAACCGAAGAAGGGCATCGGAAACCGGGCGACTTGAGTGCAGAAGAGGACAGTGGAACT	Ballou	Lactobacillus	80% Study
a902e8e92fa69543c789cc79f2458386	CGTTATCCGGATTTATTGGGCGTAAAGCGAGCGCAGGCGGTTTTCTAAGTCTGATGTGAAAGCCTTCGGCTTAACCGGAGAAGTGCATCGGAAACTGGATAACTTGAGTGCAAGAGAGGACAGTGGAACT	Ballou	Lactobacillus	80% Study
86f34705ffbb822ae6782e78eddea7b0	CGTTGTCCGGATTTATTGGGCGTAAAGCGAGCGCAGGCGGAAAAATAAGTCTGATGTGAAAGCCCTCGGCTTAACCGAGGAACTGCATCGGAAACTGTTTTTCTTGAGTGCAGAAGAGGAGAGTGGAACT	Ballou	Lactobacillus	80% Study
f68127e338497b33ff43bd13493955c5	CGTTATCCGGATTTATTGGGCGTAAAGCGAGCGCAGGCGGTTACTTAGGTCTGATGTGAAAGCCTTCGGCTTAACCGAAGAAGTGCATCGGAAACCGGGCGACTTGAGTGCAGAAGAGGACAGTGGAACT	Ballou	Lactobacillus	80% Study
52a0159280b469970021f30154e6b2e7	CGTTGTCCGGATTTATTGGGCGTAAAGGGAACGCAGGCGGTTTTTTAAGTCTGATGTGAAAGCCTTCGGCTTAACCGGAGATGTGCATTGGAAACTGGAAGACTTGAGTGCAGAAGAGGAGAGTGGAACT	Ballou	Lactobacillus	80% Study
f131ee0545861c10ed40d30a110c428e	CGTTGTCCGGATTTATTGGGCGTAAAGGGAACGCAGGCGGTCCTTTAAGTCTGATGTGAAAGCCTTCGGCTTAACCGAAGAATTGCATTGGAAACTGGAGGACTTGAGTGCAGAAGAGGAGAGTGGAACT	Ballou	Lactobacillus	80% Study
9dc932b61ebd1ff5fe580d4b133fb1b1	CGTTGTCCGGATTTATTGGGCGTAAAGGGAACGCAGGCGGCTTTTTAAGTCTGATGTGAAAGCCTTCGGCTTAACCGGAGATGTGCATTGGAAACTGGAAGACTTGAGTGCAGAAGAGGAGAGTGGAACT	Ballou	Lactobacillus	80% Study
c6d682cdeded3bcb7aa7107d12201d99	CGTTGTCCGGATTTATTGGGCGTAAAGGGAACGCAGGCGGTTTTTTAAGTCTGATGTGAAAGCCTTCGGCTTAACCGGAGTAGTGCATTGGAAACTGGAAGACTTGAGTGCAGAAGAGGAGAGTGGAACT	Ballou	Lactobacillus	80% Study
bb3221b32a269baba603430f0d70ae9d	CGTTGTCCGGATTTATTGGGCGTAAAGGGAACGCAAGCGGTTTTTTAAGTCTGATGTGAAAGCCTTCGGCTTAACCGGAGATGTGCATTGGAAACTGGAAGACTTGAGTGCAGAAGAGGAGAGTGGAACT	Ballou	Lactobacillus	80% Study
24f90561c8a0b3e69b9f42a17a6ec84a	CGTTATCCGGATTTATTGGGCGTAAAGCGAGCGCAGGCGGTTGTTTAGGTCTGATGTGAAAGCCTTCGGCTTAACCGAAGAAGTGCATCGGAAACCGGGCGACTTGAGTGCAGAAGAGGACAGTGGAACT	Ballou	Lactobacillus	80% Study
0cb1aa5e30815db502ebcfa619fa454e	CAATGGACGCAAGTCTGATGGAGCAACGCCGCGTGAGTGAAGAAGGTTTTCGGATCGTAAAGCTCTGTTGTTGGTGAAGAAGGATAGAGGTAGTAACTGGCCTTTATTTGACGGTAATCAACCAGAAAGT	Ballou	Lactobacillus	80% Study
4f462d86e0499b5c08e7b30d1a943162	CAATGGACGCAAGTCTGATGGAGCAACGCCGCGTGAGTGAAGAAGGTCTTCGGATCGTAAAACTCTGTTGTTAGAGAAGAACACGAGTGAGAGTAACTGTTCATTCGATGACGGTATCTAACCAGCAAGT	Ballou	Lactobacillus	80% Study
21e4d22ea2c4c323917156d8fd777892	CGTTATCCGGATTTACTGGGTGTAAAGGGAGCGTAGACGGAGCAGCAAGTCTGATGTGAAAGGCGGGGGCTCAACCCCCGGACTGCATTGGAAACTGCTGATCTTGAGTACCGGAGGGGTAAGCGGAATT	Ballou	Blautia	80% Study
853d308e325c961766f9f967323f29a6	CGTTATCCGGATTTACTGGGTGTAAAGGGAGCGTAGACGGCAGAGCAAGTCTGATGTGAAAGGCAGGGGCTCAACCCCTGGACTGCATTGGAAACTGTTCGGCTTGAGTGCCGGAGAGGTAAGCGGAATT	Ballou	Blautia	80% Study
b89d3ea28e1cfdc7378dd6370db7137e	CGTTATCCGGATTTACTGGGTGTAAAGGGAGCGTAGACGGAGAGGCAAGTCTGATGTGAAAGGCATGGGCTCAACCTGTGGACTGCATTGGAAACTGTTTTTCTAGAGTGCCGGAGAGGCAGGCGGAATT	Ballou	Blautia	80% Study
4fc7380d9aec8c232553a8e5bb3eee7b	CGTTATCCGGATTTACTGGGTGTAAAGGGAGCGTAGACGGAATGGCAAGTCTGATGTGAAAGGCGGGGGCTCAACCCCTGGACTGCATTGGAAACTGCCAGTCTTGAGTACCGGAGGGGTAAGCGGAATT	Ballou	Blautia	80% Study
d01faceac941634e294a35fc912f044c	CGTTATCCGGATTTACTGGGTGTAAAGGGAGCGTAGACGGAGTAGCAAGTCTGATGTGAAAGGCGGGGGCTCAACCCCCGGACTGCATTGGAAACTGCTGATCTTGAGTACCGGAGGGGTAAGCGGAATT	Ballou	Blautia	80% Study
c7facb51ff11c7639d2e841a9fd4477a	CGTTATCCGGATTTACTGGGTGTAAAGGGAGCGTAGACGGAGCAGCAAGTCTGATGTGAAAGACCGGGGCTTAACCCCGGGCCTGCATTGGAAACTGTTGATCTTGAGTGCCGGAGGGGTAAGCGGAATT	Ballou	Blautia	80% Study
525683a2fa1a8c98ce19fb8db5eb1253	CGTTATCCGGATTTACTGGGTGTAAAGGGAGCGTAGACGGCGGAGCAAGTCTGATGTGAAAGGCAGGGGCTTAACCCCTGGACTGCATTGGAAACTGTTTAGCTGGAGTGCCGGAGAGGTAAGCGGAATT	Ballou	Blautia	80% Study
ba91608ad93650e6393913b6b1ef5eeb	CGTTATCCGGATTTACTGGGTGTAAAGGGAGCGTAGACGGATGGACAAGTCTGATGTGAAAGGCGGGGGCCCAACCCCCGGACTGCATTGGAAACTGCCCGTCTTGAGTGCCGGAGAGGTAAGCGGAATT	Ballou	Blautia	80% Study
3ccf53060ade79a44ec314319dfe5036	CGTTATCCGGATTTACTGGGTGTAAAGGGAGCGTAGACGGGACAGCAAGTCTGATGTGAAAGGCGGGGGCTCAACCCCCGGACTGCATTGGAAACTGCTGGCCTGGAGTACCGGAGGGGTAAGCGGAATT	Ballou	Blautia	80% Study
15d0bff2a9749d153a02ed3a80da5fb0	CGTTATCCGGATTTACTGGGTGTAAAGGGAGCGTAGACGGGACAGCAAGTCTGATGTGAAAGGCGGGGGCTCAACCCCCGGACTGCATTGGAAACTGCTGACCTGGAGTACCGGAGGGGTAAGCGGAATT	Ballou	Blautia	80% Study
91b064b3f3e91c61ffe3dee99bcf577c	CGTTATCCGGATTTACTGGGTGTAAAGGGAGCGTAGACGGATGGACAAGTCTGATGTGAAAGGCGGGGGCCCAACCCCTGGACTGCATTGGAAACTGCCCGTCTTGAGTGCCGGAGAGGTAAGCGGAATT	Ballou	Blautia	80% Study
f5059f6d7c02c6d24dfec437a28ff714	CGTTATCCGGATTTACTGGGTGTAAAGGGAGCGTAGACGGAGGAGCAAGTCTGGTGTGAAAGGCGGGGGCTTAACCCCTGGACTGCATTGGAAACTGTTTTTCTAGAGTGCCGGAGAGGTAAGCGGAATT	Ballou	Blautia	80% Study
7627b03f58c9cd55b09dfd594b98ae93	CAATGGGGGAAACCCTGATGCAGCGACGCCGCGTGAAGGAAGAAGTATCTCGGTATGTAAACTTCTATCAGCAGGGAAGAAAATGACGGTACCTGACTAAGAAGCCCCGGCTAACTACGTGCCAGCAGCC	Ballou	Blautia	80% Study
a0456b47ecbd555db93b22da7579dc0b	CGTTATCCGGATTTACTGGGTGTAAAGGGAGCGTAGACGGAGCAGCAAGTCTGATGTGAAAGGCAGGGGCTCAACCCCTGGACTGCATTGGAAACTGCTGATCTTGAGTACCGGAGGGGTAAGCGGAATT	Ballou	Blautia	80% Study
a7db180d779d92aa2eee3729422e56c6	CGTTATCCGGATTTACTGGGTGTAAAGGGAGCGTAGACGGAGCAGCAAGTCTGATGTGAAAGGCAGGGGCTCAACCCCTGGACTGCATTGGAAACTGTTGATCTTGAGTACCGGAGGGGTAAGCGGAATT	Ballou	Blautia	80% Study
8b5526580cf1613a01db3a69f522271d	CGTTATCCGGATTTACTGGGTGTAAAGGGAGCGTAGACGGCGAAGCAAGTCTGAAGTGAAAACCCAGGGCTCAACCCTGGGACTGCTTTGGAAACTGTTTTGCTAGAGTGCTGGAGAGGTAAGTGGAATT	Ballou	Clostridium	80% Study
a44c018ad3af46faa3ba0841f122651d	CGTTATCCGGAATTATTGGGCGTAAAGAGGGAGCAGGCGGCAGCAAGGGTCTGTGGTGAAAGGCTGAAGCTTAACTTCAGTGTGCCAGAGAAACCGGGCAGCTAGAGTGCAGGAGAGGATCGTGGAATTC	Ballou	Clostridium	80% Study
1432c3b8daac4b38154e48b1f4b38fbd	CGTTATCCGGAATTATTGGGCGTAAAGAGGGAGCAGGCGGCGGCAGAGGTCTGTGGTGAAAGACTGAAGCTTAACTTCAGTAAGCCATAGAAACCGGGCTGCTAGAGTGCAGGAGAGGATCGTGGAATTC	Ballou	Clostridium	80% Study
0b2e3cee6c016d473acf4799db326159	CGTTATCCGGAATTACTGGGCGTAAAGAGGGAGCAGGCGGCAGCAAGGGTCTGCGGTGAAAGACTGAAGCTCAACTTCAGTAAGCCGCGGAAACCGGGCAGCTAGAGTGCAGGAGAGGACCGTGGAATTC	Ballou	Clostridium	80% Study
023133a0cceb74994a300638c80030f0	CGTTGTCCGGAATTACTGGGTGTAAAGGGAGCGTAGGCGGGGTGCCAAGTTGAATGTGAAATCGGCCGGCTTAACTGGTCGCTGCGTTCAAAACTGGCGCTCTTGAGTGGAGCAGAGGCAGGCGGAATTC	Ballou	Clostridium	80% Study
c5b6d02c7ca9cb0a58907b50c90289b8	CGTTATCCGGATTTACTGGGTGTAAAGGGTGAGTAGGCGGTTATGCAAGTCATATGTGAAATTCTGGAGCTCAACTCCAGCGCTGCATAAGAAACTGTGTAACTAGAGTACAGGAGAGGTAAGCGGAATT	Ballou	Clostridium	80% Study
98c845178cb239a7325461c7426daa7c	CGTTGTCCGGAATTACTGGGTGTAAAGGGAGCGTAGGCGGGTCTGCAAGTTGAATGTGAAATCTAACGGCTCAACCGATAGCTGCGTTCAAAACTGCAGATCTTGAGTGAAGTAGAGGCAGGCGGAATTC	Ballou	Clostridium	80% Study
799a7c18478d77a113862269cc5a9d5d	CGTTGTCCGGAATTACTGGGTGTAAAGGGAGCGTAGGCGGGAATGCAAGTTGAATGTGAAACCTATCGGCTTAACTGATAGTTGCGTTCAAAACTGTATTTCTTGAGTGAAGTAGAGGCAGGCGGAATTC	Ballou	Clostridium	80% Study
97d6cbad16754cd12a5546de1ed6b512	CGTTGTCCGGAATTACTGGGTGTAAAGGGAGCGTAGGCGGGAATGCAAGTTGAATGTCAAATCTACCGGCTTAACTGGTAGCCGCGTTCAAAACTGCGTTTCTTGAGTGAAGTAGAGGCAGGCGGAATTC	Ballou	Clostridium	80% Study
e36661026126cf24b81cdbc844ee5873	CGTTATCCGGATTTACTGGGTGTAAAGGGTGAGTAGGCGGTTATGCAAGTCATATGTGAAATGTCGGGGCTCAACTCCGGCCTGCATAAGAAACTGTATAACTAGAGTGCAGGAGAGGCAAGCGGAATTC	Ballou	Clostridium	80% Study
0771b47fc09872df2a38dd8d33542e98	CGTTGTCCGGAATTACTGGGTGTAAAGGGAGCGTAGGCGGTCTTGCAAGTTGAATGTTTAAACTATCGGCTTAACTGGTAGTCGCGTTCAAAACTGCAGGACTTGAGTGAAGTAGAGGCAGGCGGAATTC	Ballou	Clostridium	80% Study
7f61174c6ebcd5e47f46d5be44254a49	CGTTGTCCGGAATTACTGGGTGTAAAGGGAGCGTAGGCGGGGAAACAAGTTGAATGTTAAATCTATCGGCTCAACCGATAGCTGCGTTCAAAACTGTATCTCTTGAGTGAAGTAGAGGCAGGCGGAATTC	Ballou	Clostridium	80% Study
a12d2641d389e9f65559363efec66cce	CGTTGTCCGGAATTACTGGGTGTAAAGGGAGCGTAGGCGGGATTGCAAGTTAAATGTGAAATCTATCGGCTCAACCGGTAGCTGCGTTTAAAACTGTAGTTCTTGAGTGAAGTAGAGGCAGGCGGAATTC	Ballou	Clostridium	80% Study
dd31b643a75f017cade479dd6173253c	CAATGGGGGGAACCCTGACCGAGCAACGCCGCGTGAAGGAAGAAGGAATTCGTTCTGTAAACTTCTGTTATAAAGGAAGAACGGCACATATAGGGAATGATATGTGAGTGACGGTACTTTATGAGGAAGC	Ballou	Clostridium	80% Study
d8a0ee3565271aa7fbe9355d70068078	CGTTATCCGGAATTACTGGGTGTAAAGGGTGCGTAGGTGGCAGGGCAAGTCAGAAGTGAAAGCCCGGGGCTTAACTCCGGGACTGCTTTTGAAACTGCCAGGCTGGAGTGCAGGAGAGGTAAGCGGAATT	Ballou	Coprococcus	80% Study
0d70a72e79e2e24de912abeb90649d19	CGTTATCCGGAATTACTGGGTGTAAAGGGTGCGTAGGTGGCAGGGCAAGTCAGAAGTGAAAACCCGGGGCTCAACTCCGGGACTGCTTTTGAAACTGTCCAGCTAGAGTGCAGGAGAGGTAAGCGGAATT	Ballou	Coprococcus	80% Study
ddc3809f53084afd5fcc05af64530bd5	CGTTATCCGGATTTACTGGGTGTAAAGGGAGCGTAGGCGGTCTGACAAGTCAGAAGTGAAAGCCCGGGGCTCAACCTCGGGACTGCTTTTGAAACTGCCGGACTAGATTGCAGGAGAGGTAAGTGGAATT	Ballou	Coprococcus	80% Study
a0c6b604d78b53a9b1c9fb49da3ce707	CGTTATCCGGATTTACTGGGTGTAAAGGGAGCGCAGGCGGCGCAGTAAGTCAGAAGTGAAAGCCCGGGGCTTAACTCCGGGACTGCTTTTGAAACTGCCGTGCTTGATTTCAGGAGAGGCAAGCGGAATT	Ballou	Coprococcus	80% Study
889648d6742d42e11d75afced3977764	CGTTATCCGGATTTACTGGGTGTAAAGGGAGCGTAGGCGGTCTGACAAGTCAGAAGTGAAAGCCCAGGGCTCAACTCTGGGACTGCTTTTGAAACTGCCGGACTAGATTGCAGGAGAGGTAAGTGGAATT	Ballou	Coprococcus	80% Study
0d0ced7f8016326fab5a2653da2334f2	CGTTATCCGGAATTACTGGGTGTAAAGGGTGCGTAGGTGGCAGGGCAAGTCAGAAGTGAAAACCCGGGGCTCAACTCCGGGACTGCTTTTGAAACTGTCCAGCTGGAGTGCAGGAGAGGTAAGCGGAATT	Ballou	Coprococcus	80% Study
b81989b8ea951bd45efe0f0d57553406	CGTTATCCGGATTTACTGGGTGTAAAGGGAGCGTAGGCGGTCTGACAAGTCAGAAGTGAAAGCCCGGGGCTCAACTCCGGGACTGCTTTTGAAACTGCCGGACTAGATTGCAGGAGAGGTAAGTGGAATT	Ballou	Coprococcus	80% Study
1a658fa02db8d689e2f4f4ca3f1ccdd9	CGTTAATCGGAATCACTGGGCGTAAAGCGCACGTAGGCGGTCTGGTAAGTCAGAGGTGAAAGCCCACAGCCCAACTGTGGAACTGCCTTTGATACTGCCAGACTTGAGTACCGGAGAGGGTGGCGGAATT	Ballou	Bilophila	80% Study
8b5526580cf1613a01db3a69f522271d	CGTTATCCGGATTTACTGGGTGTAAAGGGAGCGTAGACGGCGAAGCAAGTCTGAAGTGAAAACCCAGGGCTCAACCCTGGGACTGCTTTGGAAACTGTTTTGCTAGAGTGCTGGAGAGGTAAGTGGAATT	Ballou	Clostridium	80% Study
a44c018ad3af46faa3ba0841f122651d	CGTTATCCGGAATTATTGGGCGTAAAGAGGGAGCAGGCGGCAGCAAGGGTCTGTGGTGAAAGGCTGAAGCTTAACTTCAGTGTGCCAGAGAAACCGGGCAGCTAGAGTGCAGGAGAGGATCGTGGAATTC	Ballou	Clostridium	80% Study
1432c3b8daac4b38154e48b1f4b38fbd	CGTTATCCGGAATTATTGGGCGTAAAGAGGGAGCAGGCGGCGGCAGAGGTCTGTGGTGAAAGACTGAAGCTTAACTTCAGTAAGCCATAGAAACCGGGCTGCTAGAGTGCAGGAGAGGATCGTGGAATTC	Ballou	Clostridium	80% Study
0b2e3cee6c016d473acf4799db326159	CGTTATCCGGAATTACTGGGCGTAAAGAGGGAGCAGGCGGCAGCAAGGGTCTGCGGTGAAAGACTGAAGCTCAACTTCAGTAAGCCGCGGAAACCGGGCAGCTAGAGTGCAGGAGAGGACCGTGGAATTC	Ballou	Clostridium	80% Study
023133a0cceb74994a300638c80030f0	CGTTGTCCGGAATTACTGGGTGTAAAGGGAGCGTAGGCGGGGTGCCAAGTTGAATGTGAAATCGGCCGGCTTAACTGGTCGCTGCGTTCAAAACTGGCGCTCTTGAGTGGAGCAGAGGCAGGCGGAATTC	Ballou	Clostridium	80% Study
c5b6d02c7ca9cb0a58907b50c90289b8	CGTTATCCGGATTTACTGGGTGTAAAGGGTGAGTAGGCGGTTATGCAAGTCATATGTGAAATTCTGGAGCTCAACTCCAGCGCTGCATAAGAAACTGTGTAACTAGAGTACAGGAGAGGTAAGCGGAATT	Ballou	Clostridium	80% Study
98c845178cb239a7325461c7426daa7c	CGTTGTCCGGAATTACTGGGTGTAAAGGGAGCGTAGGCGGGTCTGCAAGTTGAATGTGAAATCTAACGGCTCAACCGATAGCTGCGTTCAAAACTGCAGATCTTGAGTGAAGTAGAGGCAGGCGGAATTC	Ballou	Clostridium	80% Study
799a7c18478d77a113862269cc5a9d5d	CGTTGTCCGGAATTACTGGGTGTAAAGGGAGCGTAGGCGGGAATGCAAGTTGAATGTGAAACCTATCGGCTTAACTGATAGTTGCGTTCAAAACTGTATTTCTTGAGTGAAGTAGAGGCAGGCGGAATTC	Ballou	Clostridium	80% Study
97d6cbad16754cd12a5546de1ed6b512	CGTTGTCCGGAATTACTGGGTGTAAAGGGAGCGTAGGCGGGAATGCAAGTTGAATGTCAAATCTACCGGCTTAACTGGTAGCCGCGTTCAAAACTGCGTTTCTTGAGTGAAGTAGAGGCAGGCGGAATTC	Ballou	Clostridium	80% Study
e36661026126cf24b81cdbc844ee5873	CGTTATCCGGATTTACTGGGTGTAAAGGGTGAGTAGGCGGTTATGCAAGTCATATGTGAAATGTCGGGGCTCAACTCCGGCCTGCATAAGAAACTGTATAACTAGAGTGCAGGAGAGGCAAGCGGAATTC	Ballou	Clostridium	80% Study
0771b47fc09872df2a38dd8d33542e98	CGTTGTCCGGAATTACTGGGTGTAAAGGGAGCGTAGGCGGTCTTGCAAGTTGAATGTTTAAACTATCGGCTTAACTGGTAGTCGCGTTCAAAACTGCAGGACTTGAGTGAAGTAGAGGCAGGCGGAATTC	Ballou	Clostridium	80% Study
7f61174c6ebcd5e47f46d5be44254a49	CGTTGTCCGGAATTACTGGGTGTAAAGGGAGCGTAGGCGGGGAAACAAGTTGAATGTTAAATCTATCGGCTCAACCGATAGCTGCGTTCAAAACTGTATCTCTTGAGTGAAGTAGAGGCAGGCGGAATTC	Ballou	Clostridium	80% Study
a12d2641d389e9f65559363efec66cce	CGTTGTCCGGAATTACTGGGTGTAAAGGGAGCGTAGGCGGGATTGCAAGTTAAATGTGAAATCTATCGGCTCAACCGGTAGCTGCGTTTAAAACTGTAGTTCTTGAGTGAAGTAGAGGCAGGCGGAATTC	Ballou	Clostridium	80% Study
dd31b643a75f017cade479dd6173253c	CAATGGGGGGAACCCTGACCGAGCAACGCCGCGTGAAGGAAGAAGGAATTCGTTCTGTAAACTTCTGTTATAAAGGAAGAACGGCACATATAGGGAATGATATGTGAGTGACGGTACTTTATGAGGAAGC	Ballou	Clostridium	80% Study
01c1c5a68558b017a50bbe4f6f6d4f1b	CGTTGTCCGGAATTACTGGGTGTAAAGGGAGCGTAGGCGGGATGGCAAGTAGAATGTTAAATCCATCGGCTCAACCGGTGGCTGCGTTCTAAACTGCCGTTCTTGAGTGAAGTAGAGGCAGGCGGAATTC	Ballou	Anaerotruncus	80% Study
06466e73539ef2f8843cc0c4e1b1f965	CGTTGTCCGGAATTACTGGGTGTAAAGGGAGCGTAGGCGGGATGGCAAGTAGAATGTGAAAACAGCCGGCTCAACTGGTTGTTGCGTTCTAAACTGCCGTTCTTGAGTGAAGTAGAGGCAGGCGGAATTC	Ballou	Anaerotruncus	80% Study
a541d64ce6985ff18f70847e97564ed7	CAATGGAGGAAACTCTGATGCAGCGACGCCGCGTGAGGGAAGACGGTCTTCGGATTGTAAACCTCTGTCTTAGGGGAAGAAGATGACGGTACCCTAAGAGGAAGCTCCGGCTAACTACGTGCCAGCAGCC	Ballou	Anaerotruncus	80% Study
c3c12bb3958df0ff179b62ba2c41539f	CGTTATCCGGATTTACTGGGTGTAAAGGGCGTGTAGGCGGGCTTGTAAGTTGGAAGTGAAATCTCGGGGCTTAACCCCGAAACTGCTTTCAAAACTGCGAGTCTTGAGTGATGGAGAGGCAGGCGGAATT	Ballou	Butyricicoccus	80% Study
c9ecf7ce6dd90459f6ee0fa36992c76f	CGTTATCCGGATTTACTGGGTGTAAAGGGCGAGTAGGCGGGCTGGTAAGTTGGAAGTGAAATCCCGGGGCTTAACCCCGGAACTGCTTTCAAAACTGCTGGTCTTGAGTGATGGAGAGGCAGGCGGAATT	Ballou	Butyricicoccus	80% Study
ab86262281b94fc6a8d82f81a6c6a42a	CGTTATCCGGATTTACTGGGTGTAAAGGGCGTGTAGGCGGGCTTGCAAGTTGGAAGTGAAATCTCGGGGCTTAACCCCGAAACTGCTTTCAAAACTGCGAGTCTTGAGTGATGGAGAGGCAGGCGGAATT	Ballou	Butyricicoccus	80% Study
2ea46c98e446fc45c001a14e5feb25ea	CGTTATCCGGATTTACTGGGTGTAAAGGGCGAGTAGGCGGGCTGGTAAGTTGGAAGTGAAATCCCAGGGCTTAACCCCGGAACTGCTTTCAAAACTGCTGGTCTTGAGTGATGGAGAGGCAGGCGGAATT	Ballou	Butyricicoccus	80% Study
75d957fc93d0b9aa519f7ae5d5d586ea	CGTTATCCGGATTTACTGGGTGTAAAGGGCGTGTAGGCGGGCTTGTAAGTTGGAAGTGAAATCCAGGGGCTTAACCCCTGAACTGCTTTCAAAACTGCGAGTCTTGAGTGATGGAGAGGCAGGCGGAATT	Ballou	Butyricicoccus	80% Study
f0972fe7fcc207d51285a1437ade9afb	CGTTATCCGGATTTACTGGGTGTAAAGGGCGTGTAGGCGGGCTTGTAAGTTGGAAGTGAAATCTGGGGGCTTAACCCCCAAACTGCTTTCAAAACTGCGAGTCTTGAGTGATGGAGAGGCAGGCGGAATT	Ballou	Butyricicoccus	80% Study
0cb80cedd1859f19a8f55858690c966c	CGTTATCCGGAATCATTGGGCGTAAAGAGGGAGCAGGCGGCAGTGCAGGTCTGCGGTGAAAGCCCGAAGCTAAACTTCGGTAAGCCGTGGAAACCGCACAGCTAGAGAGCATCAGAGGATCGCGGAATTC	Ballou	Coprobacillus	80% Study
ad2916beb5f9363d09b3fb0998df0f61	CGTTATCCGGAATCATTGGGCGTAAAGAGGGAGCAGGCGGCAGTGCAGGTCTGCGGTGAAAGACCGGAGCTAAACTTCGGTAAGCCGTGGAAACCGCACAGCTAGAGAGCATCAGAGGATCGCGGAATTC	Ballou	Coprobacillus	80% Study
b7a10a1aa399b868a60685d5a10cd2c5	CGTTATCCGGAATGATTGGGCGTAAAGGGTGCGTAGGTGGCACGATAAGTCTGGAGTAAAAGGGAGCGGCTCAACCGCTGTTGGCTCTGGAAACTGTCGAGCTAGAGAGCAGGAGAGGGCGATGGAATTC	Ballou	cc_115	80% Study
de8a2711b015e53dad96f138a7bf1771	CGTTATCCGGAATCATTGGGCGTAAAGGGTGCGTAGGTGGCACGATAAGTCTGTAGTAAAAGGCAGCGGCTCAACCGCTGTTGGCTATGGAAACTGTCGAGCTGGAGTGCAGAAGAGGGCGATGGAATTC	Ballou	cc_115	80% Study
8b5526580cf1613a01db3a69f522271d	CGTTATCCGGATTTACTGGGTGTAAAGGGAGCGTAGACGGCGAAGCAAGTCTGAAGTGAAAACCCAGGGCTCAACCCTGGGACTGCTTTGGAAACTGTTTTGCTAGAGTGCTGGAGAGGTAAGTGGAATT	Ballou	Clostridium	80% Study
a44c018ad3af46faa3ba0841f122651d	CGTTATCCGGAATTATTGGGCGTAAAGAGGGAGCAGGCGGCAGCAAGGGTCTGTGGTGAAAGGCTGAAGCTTAACTTCAGTGTGCCAGAGAAACCGGGCAGCTAGAGTGCAGGAGAGGATCGTGGAATTC	Ballou	Clostridium	80% Study
1432c3b8daac4b38154e48b1f4b38fbd	CGTTATCCGGAATTATTGGGCGTAAAGAGGGAGCAGGCGGCGGCAGAGGTCTGTGGTGAAAGACTGAAGCTTAACTTCAGTAAGCCATAGAAACCGGGCTGCTAGAGTGCAGGAGAGGATCGTGGAATTC	Ballou	Clostridium	80% Study
0b2e3cee6c016d473acf4799db326159	CGTTATCCGGAATTACTGGGCGTAAAGAGGGAGCAGGCGGCAGCAAGGGTCTGCGGTGAAAGACTGAAGCTCAACTTCAGTAAGCCGCGGAAACCGGGCAGCTAGAGTGCAGGAGAGGACCGTGGAATTC	Ballou	Clostridium	80% Study
023133a0cceb74994a300638c80030f0	CGTTGTCCGGAATTACTGGGTGTAAAGGGAGCGTAGGCGGGGTGCCAAGTTGAATGTGAAATCGGCCGGCTTAACTGGTCGCTGCGTTCAAAACTGGCGCTCTTGAGTGGAGCAGAGGCAGGCGGAATTC	Ballou	Clostridium	80% Study
c5b6d02c7ca9cb0a58907b50c90289b8	CGTTATCCGGATTTACTGGGTGTAAAGGGTGAGTAGGCGGTTATGCAAGTCATATGTGAAATTCTGGAGCTCAACTCCAGCGCTGCATAAGAAACTGTGTAACTAGAGTACAGGAGAGGTAAGCGGAATT	Ballou	Clostridium	80% Study
98c845178cb239a7325461c7426daa7c	CGTTGTCCGGAATTACTGGGTGTAAAGGGAGCGTAGGCGGGTCTGCAAGTTGAATGTGAAATCTAACGGCTCAACCGATAGCTGCGTTCAAAACTGCAGATCTTGAGTGAAGTAGAGGCAGGCGGAATTC	Ballou	Clostridium	80% Study
799a7c18478d77a113862269cc5a9d5d	CGTTGTCCGGAATTACTGGGTGTAAAGGGAGCGTAGGCGGGAATGCAAGTTGAATGTGAAACCTATCGGCTTAACTGATAGTTGCGTTCAAAACTGTATTTCTTGAGTGAAGTAGAGGCAGGCGGAATTC	Ballou	Clostridium	80% Study
97d6cbad16754cd12a5546de1ed6b512	CGTTGTCCGGAATTACTGGGTGTAAAGGGAGCGTAGGCGGGAATGCAAGTTGAATGTCAAATCTACCGGCTTAACTGGTAGCCGCGTTCAAAACTGCGTTTCTTGAGTGAAGTAGAGGCAGGCGGAATTC	Ballou	Clostridium	80% Study
e36661026126cf24b81cdbc844ee5873	CGTTATCCGGATTTACTGGGTGTAAAGGGTGAGTAGGCGGTTATGCAAGTCATATGTGAAATGTCGGGGCTCAACTCCGGCCTGCATAAGAAACTGTATAACTAGAGTGCAGGAGAGGCAAGCGGAATTC	Ballou	Clostridium	80% Study
0771b47fc09872df2a38dd8d33542e98	CGTTGTCCGGAATTACTGGGTGTAAAGGGAGCGTAGGCGGTCTTGCAAGTTGAATGTTTAAACTATCGGCTTAACTGGTAGTCGCGTTCAAAACTGCAGGACTTGAGTGAAGTAGAGGCAGGCGGAATTC	Ballou	Clostridium	80% Study
7f61174c6ebcd5e47f46d5be44254a49	CGTTGTCCGGAATTACTGGGTGTAAAGGGAGCGTAGGCGGGGAAACAAGTTGAATGTTAAATCTATCGGCTCAACCGATAGCTGCGTTCAAAACTGTATCTCTTGAGTGAAGTAGAGGCAGGCGGAATTC	Ballou	Clostridium	80% Study
a12d2641d389e9f65559363efec66cce	CGTTGTCCGGAATTACTGGGTGTAAAGGGAGCGTAGGCGGGATTGCAAGTTAAATGTGAAATCTATCGGCTCAACCGGTAGCTGCGTTTAAAACTGTAGTTCTTGAGTGAAGTAGAGGCAGGCGGAATTC	Ballou	Clostridium	80% Study
dd31b643a75f017cade479dd6173253c	CAATGGGGGGAACCCTGACCGAGCAACGCCGCGTGAAGGAAGAAGGAATTCGTTCTGTAAACTTCTGTTATAAAGGAAGAACGGCACATATAGGGAATGATATGTGAGTGACGGTACTTTATGAGGAAGC	Ballou	Clostridium	80% Study
0536966f7c18eb91ddf4ae0d067c60e2	CAGTGAGGAATATTGGTCAATGGGCGAGAGCCTGAACCAGCCAAGTAGCGTGAAGGATGACTGCCCTACGGGTTGTAAACTTCTTTTATAAGGGAATAAAGTTCTCTACGTGTAGAGTTTTGTATGTACC	Biasalto	Bacteroides	80% Study
fe62dd40eb96b995251682474b8d6863	CAGTGAGGAATATTGGTCAATGGACGAGAGTCTGAACCAGCCAAGTAGCGTGAAGGATGAAGGTCCTACGGATTGTAAACTTCTTTTATAAGGGAATAAACCCTCCCACGTGTGGGAGCTTGTATGTACC	Biasalto	Bacteroides	80% Study
5656f42d4036f09fc3ddebf73e8a6e08	CAGTGAGGAATATTGGTCAATGGGCGAGAGCCTGAACCAGCCAAGTAGCGTGAAGGATGACTGCCCTACGGGTTGTAAACTTCTTTTATAAGGGAATAAAGTGATTCACGTGTGGATTATTGCATGTACC	Biasalto	Bacteroides	80% Study
006dcd37fa86dbdeb0e81c4098e4b55f	CAGTGAGGAATATTGGTCAATGGGCGAGAGCCTGAACCAGCCAAGTAGCGTGAAGGATGACGGCCCTACGGGTTGTAAACTTCTTTTGTGCGGGAATAAAGGAGCCTACGTGTAGGCTTTTGCATGTACC	Biasalto	Bacteroides	80% Study
b4c3909194f5f2b8eeb043b35b1f3940	CAGTGAGGAATATTGGTCAATGGACGAGAGTCTGAACCAGCCAAGTAGCGTGAAGGATGAAGGTCCTACGGATTGTAAACTTCTTTTATAAGGGAATAAACCCTTCCACGTGTGGGAGCTTGTATGTACC	Biasalto	Bacteroides	80% Study
fe9ac85d0027d796984e65d58c461576	CAGTGAGGAATATTGGTCAATGGGCGAGAGCCTGAACCAGCCAAGTAGCGTGAAGGATGACTGCCCTATGGGTTGTAAACTTCTTTTATACGGGAATAACATCATCCACGTGTGGGTGTCTGCATGTACC	Biasalto	Bacteroides	80% Study
24b9d35f34a38ace19b96d3fdb44e045	AGTGAGGAATATTGGTCAATGGGCGAGAGCCTGAACCAGCCAAGTAGCGTGAAGGATGACTGCCCTACGGGTTGTAAACTTCTTTTATAAGGGAATAAAGTTCTCTACGTGTAGAGTTTTGTATGTACCT	Biasalto	Bacteroides	80% Study
0b78d592693a50908856d2b6ba1ae01f	CAGTGAGGAATATTGGTCAATGGGCGAGAGCCTGAACCAGCCAAGTAGCGTGAAGGAAGACTGCCCTATGGGTTGTAAACTTCTTTTATACGGGAATAAAGTCATCCACGTGTGGATGTTTGTATGTACC	Biasalto	Bacteroides	80% Study
09ad83563bcd91c668230e451da6cd13	CAGTGAGGAATATTGGTCAATGGGCGAGAGCCTGAACCAGCCAAGTAGCGTGAAGGATGACTGCCCTATGGGTTGTAAACTTCTTTTATACGGGAATAACAAGCGGCACGTGTGCCGCTCTGCATGTACC	Biasalto	Bacteroides	80% Study
35ec70e7950ff43068c356d9e4bcc575	CAGTGAGGAATATTGGTCAATGGGCGAGAGCCTGAACCAGCCAAGTAGCGTGAAGGATGAAGGTCCTACGGATTGTAAACTTCTTTTATACGGGAATAAAGTATCCTACGTGTAGGATTTTGTATGTACC	Biasalto	Bacteroides	80% Study
933094b5bc9cf8b0d16c056d7df214ab	CAGTGAGGAATATTGGTCAATGGGCGAGAGCCTGAACCAGCCAAGTAGCGTGAAGGATGACTGCCCTATGGGTTGTAAACTTCTTTTATACGGGAATAACACGCGGCACGTGTGCCGCTCTGCATGTACC	Biasalto	Bacteroides	80% Study
ee9798a96bfece930eef6b9431cc6d1f	CAGTGAGGAATATTGGTCAATGGACGAGAGTCTGAACCAGCCAAGTAGCGTGAAGGACGACTGCCCTATGGGTTGTAAACTTCTTTTATATAGGAATAAAGTGCAGCACGTGTGCTGTTTTGTATGTACT	Biasalto	Bacteroides	80% Study
37937a5aa57df22f0a72faed4d6a2c45	CAGTGAGGAATATTGGTCAATGGGCGAGAGCCTGAACCAGCCAAGTAGCGTGAAGGATGACGGCCCTACGGGTTGTAAACTTCTTTTGTGCGGGAATAAAGGAGCCTACGTGTAGGTTTTTGCATGTACC	Biasalto	Bacteroides	80% Study
46818b74445ee130e105873de9ecbb56	CAGTGAGGAATATTGGTCAATGGACGAGAGTCTGAACCAGCCAAGTAGCGTGAAGGATGAAGGTCCTACGGATTGTAAACTTCTTTTATAAGGGAATAAACCCTCCCACGTGTGGGAGCTTGCATGTACC	Biasalto	Bacteroides	80% Study
51eb54c7cb52a3cc5fbd2a2c88af6f5a	CAGTGAGGAATATTGGTCAATGGACGCAAGTCTGAACCAGCCAAGTAGCGTGAAGGATGACCGCCCTATGGGTTGTAAACTTCTTTTATAAGGGAATAAATTGAGGTACGCGTACCTTTTTGTATGTACC	Biasalto	Bacteroides	80% Study
78449cfd3d035cec544c540fb41d829d	AGTGAGGAATATTGGTCAATGGACGAGAGTCTGAACCAGCCAAGTAGCGTGAAGGATGAAGGTCCTACGGATTGTAAACTTCTTTTATAAGGGAATAAACCCTTCCACGTGTGGGAGCTTGTATGTACCT	Biasalto	Bacteroides	80% Study
feba14ecc34d12aba197c7bbe1c5f6b2	CAGTGAGGAATATTGGTCAATGGACGAGAGTCTGAACCAGCCAAGTAGCGTGAAGGATGACTGCCCTATGGGTTGTAAACTTCTTTTATACGGGAATAAAGTGAGGCACGCGTGCCTTTTTGTATGTACC	Biasalto	Bacteroides	80% Study
e105409ee59f5e1db29abcc9eb45e0d6	AGTGAGGAATATTGGTCAATGGGCGAGAGCCTGAACCAGCCAAGTAGCGTGAAGGATGACGGCCCTACGGGTTGTAAACTTCTTTTGTGCGGGAATAAAGGAGCCTACGTGTAGGCTTTTGCATGTACCG	Biasalto	Bacteroides	80% Study
7aeaf0e44a532680600af1ee609b9fca	CAGTGAGGAATATTGGTCAATGGACGAGAGTCTGAACCAGCCAAGTAGCGTGAAGGATGACTGCCCTATGGGTTGTAAACTTCTTTTATAAGGGAATAAAGTGAGGTACGCGTACCTTTTTGTATGTACC	Biasalto	Bacteroides	80% Study
c55aa3c3d6d24f34ef5329a2c53983cd	AGTGAGGAATATTGGTCAATGGGCGAGAGCCTGAACCAGCCAAGTAGCGTGAAGGATGACTGCCCTATGGGTTGTAAACTTCTTTTATACGGGAATAACACGCGGCACGTGTGCCGCTCTGCATGTACCG	Biasalto	Bacteroides	80% Study
7073c37466711ceef0b5ca5fbb082c11	AGTGAGGAATATTGGTCAATGGACGAGAGTCTGAACCAGCCAAGTAGCGTGAAGGATGAAGGTCCTACGGATTGTAAACTTCTTTTATAAGGGAATAAACCCTCCCACGTGTGGGAGCTTGTATGTACCT	Biasalto	Bacteroides	80% Study
32925c948fbde7c79f4c8503d14070f9	AGTGAGGAATATTGGTCAATGGGCGAGAGCCTGAACCAGCCAAGTAGCGTGAAGGATGACTGCCCTATGGGTTGTAAACTTCTTTTATACGGGAATAACATCATCCACGTGTGGGTGTCTGCATGTACCG	Biasalto	Bacteroides	80% Study
7e6c24ffed8b7dfda93dea67edb26383	CAGTGAGGAATATTGGTCAATGGGCGAGAGCCTGAACCAGCCAAGTAGCGTGAAGGATGACTGCCCTACGGGTTGTAAACTTCTTTTATAAGGGAATAAAGTATTCTACGTGTAGAGTTTTGTATGTACC	Biasalto	Bacteroides	80% Study
400360c9165bcd025c07a939f72e62c9	CAATGGGCGAGAGCCTGAACCAGCCAAGTAGCGTGAAGGATGACTGCCCTACGGGTTGTAAACTTCTTTTATAAGGGAATAAAGTATTCTACGTGTAGAGTTTTGTATGTACCTTATGAATAAGCATCGG	Biasalto	Bacteroides	80% Study
e7c65418afc8909cb84084ffe91d55d3	CAATGGGCGAGAGCCTGAACCAGCCAAGTAGCGTGAAGGATGACTGCCCTACGGGTTGTAAACTTCTTTTATAAGGGAATAAAGTTCTCTACGTGTAGAGTTTTGTATGTACCTTATGAATAAGCATCGG	Biasalto	Bacteroides	80% Study
4eed35f3dafbcb34876fa75c83e91d96	CAATGGACGAGAGTCTGAACCAGCCAAGTAGCGTGAAGGATGAAGGTCCTACGGATTGTAAACTTCTTTTATAAGGGAATAAACCCTCCCACGTGTGGGAGCTTGTATGTACCTTATGAATAAGCATCGG	Biasalto	Bacteroides	80% Study
1bf62f2fbff25cd3ac158e2d065339b7	CAATGGGCGAGAGCCTGAACCAGCCAAGTAGCGTGAAGGATGACTGCCCTATGGGTTGTAAACTTCTTTTATACGGGAATAACACCTTCCACGTGTGGAGGGCTGCATGTACCGTATGAATAAGCATCGG	Biasalto	Bacteroides	80% Study
1558cc9de8364d8d57288078190b78b1	CAATGGGCGAGAGCCTGAACCAGCCAAGTAGCGTGAAGGATGACTGCCCTATGGGTTGTAAACTTCTTTTATACGGGAATAACACGCGGCACGTGTGCCGCTCTGCATGTACCGTATGAATAAGCATCGG	Biasalto	Bacteroides	80% Study
522b3bb04a687c8e9f1687f703d9f0e5	CAATGGGCGAGAGCCTGAACCAGCCAAGTAGCGTGAAGGATGACGGCCCTACGGGTTGTAAACTTCTTTTGTGCGGGAATAAAGGAGCCTACGTGTAGGCTTTTGCATGTACCGTAACGAATAAGCATCG	Biasalto	Bacteroides	80% Study
327ae0ddb5399f2a8bf13f2b68ce036d	CAATGGGCGAGAGCCTGAACCAGCCAAGTAGCGTGAAGGATGACTGCCCTATGGGTTGTAAACTTCTTTTATACGGGAATAACATCATCCACGTGTGGGTGTCTGCATGTACCGTATGAATAAGCATCGG	Biasalto	Bacteroides	80% Study
65e95f1b3eca715843c916386580164d	CAATGGGCGAGAGCCTGAACCAGCCAAGTAGCGTGAAGGAAGACTGCCCTATGGGTTGTAAACTTCTTTTATACGGGAATAAAGTCATCCACGTGTGGATGTTTGTATGTACCGTATGAATAAGGATCGG	Biasalto	Bacteroides	80% Study
f5aec87f6388c3f0d59bbef91c443ccb	CAATGGACGAGAGTCTGAACCAGCCAAGTAGCGTGAAGGATGAAGGTCCTACGGATTGTAAACTTCTTTTATAAGGGAATAAAACCTTCCACGTGTGGGAGCTTGTATGTACCTTATGAATAAGCATCGG	Biasalto	Bacteroides	80% Study
01e8756bd32a90dfcdd18a01e771510c	CAATGGACGAGAGTCTGAACCAGCCAAGTAGCGTGAAGGACGACTGCCCTATGGGTTGTAAACTTCTTTTATATGGGAATAAAAAAGTCCACGTGTGGATTCTTGTATGTACCATATGAATAAGCATCGG	Biasalto	Bacteroides	80% Study
4bc309128b8aa441db71214f492c6cf3	AGTGAGGAATATTGGTCAATGGACGCAAGTCTGAACCAGCCAAGTAGCGTGAAGGATGACCGCCCTATGGGTTGTAAACTTCTTTTATAAGGGAATAAATTGAGGTACGCGTACCTTTTTGTATGTACCT	Biasalto	Bacteroides	80% Study
e5c6f917dd48f20aa5f94299d098bb4c	CAGTGAGGAATATTGGTCAATGGACGAGAGTCTGAACCAGCCAAGTAGCGTGAAGGACGACTGCCCTATGGGTTGTAAACTTCTTTTATATAGGAATAAAGTGAGGTATGTATACCTTTTTGTATGTACT	Biasalto	Bacteroides	80% Study
05e8aedc369d2ba0f074a3fc00a8f0d7	CAGTGAGGAATATTGGTCAATGGACGAGAGTCTGAACCAGCCAAGTAGCGTGAAGGATGACTGCCCTATGGGTTGTAAACTTCTTTTATATAGGAATAAAGTGTAGCACGTGTGCTGTTTTGTATGTACT	Biasalto	Bacteroides	80% Study
ebb82d3a01e47618ff8ce374ad0f7c5b	CAGTGAGGAATATTGGTCAATGGACGAGAGTCTGAACCAGCCAAGTAGCGTGAAGGATGACTGCCCTATGGGTTGTAAACTTCTTTTATATAGGAATAAAGTGAGGTATGTATACCTTTTTGTATGTACT	Biasalto	Bacteroides	80% Study
7562b73eaf3ebf14b95c7b1fc9baa520	CAGTGAGGAATATTGGTCAATGGACGAGAGTCTGAACCAGCCAAGTAGCGTGAAGGACGACTGCCCTATGGGTTGTAAACTTCTTTTATATGGGAATAAAAAAGTCCACGTGTGGATTCTTGTATGTACC	Biasalto	Bacteroides	80% Study
c6edf68351a44e4fd31c3ae9a075687e	CAGTGAGGAATATTGGTCAATGGACGAGAGTCTGAACCAGCCAAGTAGCGTGAAGGATGACTGCCCTATGGGTTGTAAACTTCTTTTATATGGGAATAAAAAAGGCCACGTGTGGCCTATTGTATGTACC	Biasalto	Bacteroides	80% Study
0c004a9f0bdf9e6e9c582a573d2b7fcb	CAGTGAGGAATATTGGTCAATGGCCGAGAGGCTGAACCAGCCAAGTCGCGTGAAGGAAGAAGGATCTATGGTTTGTAAACTTCTTTTATACGGGAATAAAGTGAGTCACGTGTGATTTTTTGTATGTACC	Biasalto	Parabacteroides	80% Study
4284628e6aa187c0c64b5d0dfe7b74a9	CAGTGAGGAATATTGGTCAATGGCCGGAAGGCTGAACCAGCCAAGTCGCGTGGAGGAAGAAGGATCTATGGTTTGTAAACTTCTTTTGTGCGGGGGTAAAGGTCGGTATGTATACCGCATTGAAAGTACC	Biasalto	Parabacteroides	80% Study
32e911069f5642b568ca42470cfa06be	CAGTGAGGAATATTGGTCAATGGCCGGAAGGCTGAACCAGCCAAGTCGCGTGAAGGAAGAAGGATCTATGGTTTGTAAACTTCTTTTGTACGGGGGTAAAGAGAGGGACGCGTCCCTTATTGCAAGTACC	Biasalto	Parabacteroides	80% Study
2e329c758fb61062d784ac67510229ea	CAGTGAGGAATATTGGTCAATGGCCGGAAGGCTGAACCAGCCAAGTCGCGTGGAGGAAGAAGGATCTATGGTTTGTAAACTTCTTTTGTGCGGGGGTAAAGGGCGGTATGTATACCGCATTGAAAGTACC	Biasalto	Parabacteroides	80% Study
9000adf70810dfe3b3a595857fa9c7d4	CAGTGAGGAATATTGGTCAATGGCCGGAAGGCTGAACCAGCCAAGTCGCGTGGAGGAAGAAGGATCTATGGTTTGTAAACTTCTTTTGTGCGGGGGTAAAGGTCGGTACGCGTACCGATTTGCAAGTACC	Biasalto	Parabacteroides	80% Study
d5e7fa020e5370bcc64b02e733a91163	CAGTGAGGAATATTGGTCAATGGCCGAGAGGCTGAACCAGCCAAGTCGCGTGAAGGAAGAAGGATCTATGGTTTGTAAACTTCTTTTATACGGGAATAAAGTGTGGAACGTGTTCCATTTTGTATGTACC	Biasalto	Parabacteroides	80% Study
015ddcfdcbee2f58e2150a6dcd8d584b	CAGTGAGGAATATTGGTCAATGGCCGGAAGGCTGAACCAGCCAAGTCGCGTGAAGGAAGAAGGATCTATGGTTTGTAAACTTCTTTTGTACGGGGGTAAAATGAGGGACGTGTCCCTTATTGCAAGTACC	Biasalto	Parabacteroides	80% Study
68a9d6ded67f28fe98a26b445086905b	CAGTGAGGAATATTGGTCAATGGCCGGAAGGCTGAACCAGCCAAGTCGCGTGAAGGATGAAGGATCTATGGTTTGTAAACTTCTTTTGTACGGGGGTAAAGTGAGGGACGTGTCCCTTATTGCAAGTACC	Biasalto	Parabacteroides	80% Study
3595b017273b3640f42db8dbe4b39c2a	CAATGGCCGGAAGGCTGAACCAGCCAAGTCGCGTGAAGGAAGAAGGATCTATGGTTTGTAAACTTCTTTTGTACGGGGGTAAAATGAGGGACGTGTCCCTTATTGCAAGTACCGTACGAATAAGCATCGG	Biasalto	Parabacteroides	80% Study
66ee0f839238ea1d792f7aee45ac523d	CAATGGCCGGAAGGCTGAACCAGCCAAGTCGCGTGGAGGAAGAAGGATCTATGGTTTGTAAACTTCTTTTGTGCGGGGGTAAAGGTCGGTATGTATACCGCATTGAAAGTACCGCACGAATAAGCATCGG	Biasalto	Parabacteroides	80% Study
fe2c2e4b70e1414b57c4fb6b688913c8	CAATGGCCGGAAGGCTGAACCAGCCAAGTCGCGTGGAGGAAGAAGGATCTATGGTTTGTAAACTTCTTTTGTGCGGGGGTAAAGGTCGGTACGTGTACCGATTTGCAAGTACCGCACGAATAAGCATCGG	Biasalto	Parabacteroides	80% Study
e04420ebf0a5e9c063cce460dcc2f2cf	CAATGGCCGGAAGGCTGAACCAGCCAAGTCGCGTGAAGGAAGAAGGATCTATGGTTTGTAAACTTCTTTTGTACGGGGGTAAAGAGAGGGACGTGTCCCTTATTGCAAGTACCGTACGAATAAGCATCGG	Biasalto	Parabacteroides	80% Study
b0a0d839d0be0a913f62c22c69d7bff4	CAATGGCCGGAAGGCTGAACCAGCCAAGTCGCGTGGAGGAAGAAGGATCTATGGTTTGTAAACTTCTTTTGTGCGGGGGTAAAGGGCGGTATGTATACCGCATTGAAAGTACCGCACGAATAAGCATCGG	Biasalto	Parabacteroides	80% Study
48910a78fe2232b26c346965f3915b81	CAATGGCCGGAAGGCTGAACCAGCCAAGTCGCGTGAAGGATGAAGGATCTATGGTTTGTAAACTTCTTTTGTACGGGGGTAAAGTGAGGGACGCGTCCCTTATTGCAAGTACCGTACGAATAAGCATCGG	Biasalto	Parabacteroides	80% Study
9e10e76bac156fda93f968e5cd9f295a	CAATGGCCGGAAGGCTGAACCAGCCAAGTCGCGTGGAGGAAGAAGGATCTATGGTTTGTAAACTTCTTTTGTGCGGGGGTAAAGGTCGGTACGCGTACCGATTTGCAAGTACCGCACGAATAAGCATCGG	Biasalto	Parabacteroides	80% Study
e0a8d4acbcd404dad643c81d8c40e1d0	CAATGGCCGTAAGGCTGAACCAGCCAAGTCGCGTGAAGGAAGAAGGATCTATGGTTTGTAAACTTCTTTTGTACGGGGGTAAAGTGAAGGACGTGTCCTTTATTGCAAGTACCGTACGAATAAGCATCGG	Biasalto	Parabacteroides	80% Study
1043d114079f0d7b9982c43421680b37	CAATGGGCGATAGCCTGAACCAGCCAAGTCGCGTGAGGGATGAAGGCCCTACGGGTCGTAAACCTCTTTTATAAGGGAATAAAGTGTGGGACGTGTCCCATTTTGTATGTACCTTATGAATAAGCATCGG	Biasalto	Parabacteroides	80% Study
12d978e525932ba3c01a6cb566b22bf2	CAATGGCCGGAAGGCTGAACCAGCCAAGTCGCGTGAAGGATGAAGGATCTATGGTTTGTAAACTTCTTTTGTACGGGGGTAAAGTGAGGGACGTGTCCCTTATTGCAAGTACCGTACGAATAAGCATCGG	Biasalto	Parabacteroides	80% Study
491b0fc811add9f97d32b9959367fa67	CAATGGCCGAGAGGCTGAACCAGCCAAGTCGCGTGAAGGAAGAAGGATCTATGGTTTGTAAACTTCTTTTATACGGGAATAAAGTGTGGAACGTGTTCCATTTTGTATGTACCGTATGAATAAGCATCGG	Biasalto	Parabacteroides	80% Study
a33661147913cbb14171c8f11226097f	CAGTGGGGAATATTGGGCAATGGGCGAAAGCCTGACCCAGCAACGCCGCGTGAAGGAAGAAGGCTTTCGGGTTGTAAACTTCTTTTATCAGGGACGAAGGATGTGACGGTACCTGATGAATAAGCCACGG	Biasalto	Oscillospira	80% Study
7c94470dcf767fabdafd0de968f9e8e4	CAGTGGGGAATATTGGGCAATGGGCGCAAGCCTGACCCAGCAACGCCGCGTGAAGGAAGAAGGCTTTCGGGTTGTAAACTTCTTTTGTCAGGGAAGAGCAGAAGACGGTACCTGACGAATAAGCCACGGC	Biasalto	Oscillospira	80% Study
8517e479828218ee209dbd1e1d63263d	CAGTGGGGAATATTGGGCAATGGGCGCAAGCCTGACCCAGCAACGCCGCGTGAAGGAAGAAGGCTTTCGGGTTGTAAACTTCTTTTGTCAGGGACGAACAAATGACGGTACCTGACGAATAAGCCACGGC	Biasalto	Oscillospira	80% Study
39723f5181435556c37a632d739ed615	CAGTGGGGAATATTGGGCAATGGACGCAAGTCTGACCCAGCAACGCCGCGTGAAGGAAGAAGGCTTTCGGGTTGTAAACTTCTTTTGTCAGGGAACAGTAGAAGAGGGTACCTGACGAATAAGCCACGGC	Biasalto	Oscillospira	80% Study
197362dd8cafd457904cab3cb4e4b92e	CAGTGGGGAATATTGGGCAATGGGCGCAAGCCTGACCCAGCAACGCCGCGTGAAGGAAGAAGGCCCTCGGGTTGTAAACTTCTTTTGTCAGGGACGAAGCAAGTGACGGTACCTGACGAATAAGCCACGG	Biasalto	Oscillospira	80% Study
9cd6255e879fc1ffdd8ee315d2e88fca	CAGTGGGGAATATTGGGCAATGGGCGCAAGCCTGACCCAGCAACGCCGCGTGAAGGAAGAAGGCTTTCGGGTTGTAAACTTCTTTTGTCAGGGAACAGTAGAAGAGGGTACCTGACGAATAAGCCACGGC	Biasalto	Oscillospira	80% Study
c7f3024ffffb158b0afed68189ac160c	CAGTGGGGAATATTGGGCAATGGGCGCAAGCCTGACCCAGCAACGCCGCGTGAAGGAAGAAGGCTTTCGGGTTGTAAACTTCTTTTGTCAGGGAACAGTAGAAGAGGGTACCTGACGAATAAGCTCCGGC	Biasalto	Oscillospira	80% Study
fdb879447526d3cbcbc19735ee78a7b5	CAATGGGCGCAAGCCTGACCCAGCAACGCCGCGTGAAGGAAGAAGGCCCTCGGGTTGTAAACTTCTTTTGTCAGGGACGAAGCAAGTGACGGTACCTGACGAATAAGCCACGGCTAACTACGTGCCAGCA	Biasalto	Oscillospira	80% Study
82da4148485d6eb448efa10e42ec1d47	CAATGGGCGCAAGCCTGACCCAGCAACGCCGCGTGAAGGAAGAAGGCTTTCGGGTTGTAAACTTCTTTTGTCAGGGAACAGTAGAAGAGGGTACCTGACGAATAAGCCACGGCTAACTACGTGCCAGCAG	Biasalto	Oscillospira	80% Study
d7ff55a70157b9e88fa3cb92636e1cf6	CAATGGGCGAAAGCCTGACCCAGCAACGCCGCGTGAAGGAAGAAGGCTTTCGGGTTGTAAACTTCTTTTATCAGGGACGAAGGATGTGACGGTACCTGATGAATAAGCCACGGCTAACTACGTGCCAGCA	Biasalto	Oscillospira	80% Study
e8848b3dc781ce19d2bd7bce9c4fdd7a	CAATGGGCGCAAGCCTGACCCAGCAACGCCGCGTGAAGGAAGAAGGCTTTCGGGTTGTAAACTTCTTTTGTCAGGGACGAACAAATGACGGTACCTGACGAATAAGCCACGGCTAACTACGTGCCAGCAG	Biasalto	Oscillospira	80% Study
968dfccd3413010d45f277037c37f70f	CAATGGGCGCAAGCCTGACCCAGCAACGCCGCGTGAAGGAAGAAGGCTTTCGGGTTGTAAACTTCTTTTGTCAGGGAACAGTAGAAGAGGGTACCTGACGAATAAGCTCCGGCTAACTACGTGCCAGCAG	Biasalto	Oscillospira	80% Study
f1dc1342e68dbf404ee037deacbe7b93	CAATGGGCGCAAGCCTGACCCAGCAACGCCGCGTGAAGGAAGAAGGCTTTCGGGTTGTAAACTTCTTTTGTCAGGGAAGAGGAGAAGACTGTACCTGACGAATAAGCTCCGGCTAACTACGTGCCAGCAG	Biasalto	Oscillospira	80% Study
fa1815ef7d6a72eb8e6a6060b3960f31	CAATGGGCGCAAGCCTGACCCAGCAACGCCGCGTGAAGGAAGAAGGCTTTCGGGTTGTAAACTTCTTTTATTCGGGACGATAGTGACGGTACCGAATGAATAAGCCACGGCTAACTACGTGCCAGCAGCC	Biasalto	Oscillospira	80% Study
078e7befe5ed38e1d46644bb93805858	CAATGGGCGAAAGCCTGACCCAGCAACGCCGCGTGAAGGAAGAAGGCTTTCGGGTTGTAAACTTCTTTTATCAGGGACGAAGTAGTGACGGTACCTGATGAATAAGCTCCGGCTAACTACGTGCCAGCAG	Biasalto	Oscillospira	80% Study
50c6ad36b44679ed3432f29cae3aeaf9	CAATGGGCGCAAGCCTGACCCAGCAACGCCGCGTGAAGGAAGAAGGCTTTCGGGTTGTAAACTTCTTTTCTTAGGGACGAAGGAAGTGACGGTACCTAAGGAATAAGCTCCGGCTAACTACGTGCCAGCA	Biasalto	Oscillospira	80% Study
883c45fb8e42f84d665cbfe49b27972c	CAATGGGCGCAAGCCTGACCCAGCAACGCCGCGTGAAGGAAGAAGGCTTTCGGGTTGTAAACTTCTTTTCTTGGGGACGAAACAAATGACGGTACCTAAGGAATAAGCTCCGGCTAACTACGTGCCAGCA	Biasalto	Oscillospira	80% Study
833c369f9867ad1ae128212a3f5d3439	CAATGGGCGCAAGCCTGACCCAGCAACGCCGCGTGAAGGAAGAAGGCTTTCGGGTTGTAAACTTCTTTTGTCAGGGAAGATGAAAGAGACTGTACCTGACGAATAAGCCACGGCTAACTACGTGCCAGCA	Biasalto	Oscillospira	80% Study
a2de5a82fbe20bd5a562892b3260b387	CAATGGACGCAAGTCTGACCCAGCAACGCCGCGTGAAGGAAGAAGGCTTTCGGGTTGTAAACTTCTTTTGTCAGGGAACAGTAGAAGAGGGTACCTGACGAATAAGCCACGGCTAACTACGTGCCAGCAG	Biasalto	Oscillospira	80% Study
1039e01fbbd09d024e085c66093311ef	CAATGGGCGCAAGCCTGACCCAGCAACGCCGCGTGAAGGAAGAAGGCTTTCGGGTTGTAAACTTCTTTTATTCGGGACGAAGCAAGTGACGGTACCGAATGAATAAGCCACGGCTAACTACGTGCCAGCA	Biasalto	Oscillospira	80% Study
6013f2d680276a29488635d7857b5d11	CAATGGGCGCAAGCCTGACCCAGCAACGCCGCGTGAAGGAAGAAGGCTTTCGGGTTGTAAACTTCTTTTGTCAGGGAAGATGAACGAGACTGTACCTGACGAATAAGCCACGGCTAACTACGTGCCAGCA	Biasalto	Oscillospira	80% Study
5ac0da8ea328604105b9eab464d17d9d	CAGTGAGGAATATTGGTCAATGGTCGGCAGACTGAACCAGCCAAGTCGCGTGAAGGAAGACGGCCCTAAGGGTTGTAAACTTCTTTTGTCGGAGAGTAAAGGTCTTCACGAGTGGAGATTTGCAAGTATC	Biasalto	Barnesiella	80% Study
98ee7d8a2b09598d755bf4ab96951f16	CAGTGAGGAATATTGGTCAATGGTCGGCAGACTGAACCAGCCAAGTCGCGTGAGGGAAGACGGCCCTACGGGTTGTAAACCTCTTTTGTCGGAGAGTAAAGAGCGCCACGGGTGGCGCGTTGCAAGTATC	Biasalto	Barnesiella	80% Study
8450d9e99c6ea3e55eafaa7bd7560649	CAATGGTCGGCAGACTGAACCAGCCAAGTCGCGTGAAGGAAGACGGCCCTACGGGTTGTAAACTTCTTTTGTCGGAGAGTAAAGTGCGCTACGCGTAGCGTATTGCAAGTATCCGAAGAAAAAGCATCGG	Biasalto	Barnesiella	80% Study
980fc8d4833f947f5aab28ecb228c090	CAATGGTCGGCAGACTGAACCAGCCAAGTCGCGTGAAGGAAGACGGCCCTACGGGTTGTAAACTTCTTTTGTCGGAGAGTAAAGGGCACTACGTGTAGTGTTTTGCAAGTATCCGAAGAAAAAGCATCGG	Biasalto	Barnesiella	80% Study
14d4305db30d54a6df708db169e2e297	CAGTGAGGAATATTGGTCAATGGTCGGCAGACTGAACCAGCCAAGTCGCGTGAAGGAAGACGGCCCTACGGGTTGTAAACTTCTTTTGTCGGAGAGTAAAGTGCGCTACGTGTAGCGTATTGCAAGTATC	Biasalto	Barnesiella	80% Study
5e3d8f6b6194a8ae5f986222d2de46a2	CAGTGGGGAATATTGCGCAATGGGCGAAAGCCTGACGCAGCAACGCCGCGTGAGGGATGAAGGTCTTCGGATCGTAAACCTCTGTCGGGAGGGAAAAACGTGCAGTGTGCTAATCAGCATTGCAGTGATG	Biasalto	Desulfovibrio	80% Study
64b0ea85eb6eb657b7db08df441b506e	CAGTGGGGAATATTGCGCAATGGGCGAAAGCCTGACGCAGCGACGCCGCGTGAGGGATGAAGGTCTTCGGATCGTAAACCTCTGTCGGGAGGGAAAAACGTACACTGTGCTAATCAGCAGTGTAGTGATG	Biasalto	Desulfovibrio	80% Study
c7fc5ac45c1ef7f809cc2fe1cbd405d8	AGTGGGGAATATTGCGCAATGGGCGAAAGCCTGACGCAGCAACGCCGCGTGAGGGATGAAGGTCTTCGGATCGTAAACCTCTGTCGGGAGGGAAAAACGTGCAGTGTGCTAATCAGCATTGCAGTGATGG	Biasalto	Desulfovibrio	80% Study
020f82cd0331eed51334fe3ba60a501b	CAGTGGGGAATATTGCGCAATGGGCGAAAGCCTGACGCAGCGACGCCGCGTGAGGGATGAAGGTCTTCGGATCGTAAACCTCTGTCAGAAGGGAAGAAACTAGGGTGCTCTAATCATCATCCTACTGACG	Biasalto	Desulfovibrio	80% Study
565944ab7cc8e95cbd63147076a8be6a	CAGTGGGGAATATTGCGCAATGGGCGAAAGCCTGACGCAGCGACGCCGCGTGAGGGATGAAGGTCTTCGGATCGTAAACCTCTGTCAGAAGGGAAGAAACCGGAGCGTGCTAATCAGCGCTCCATTGACG	Biasalto	Desulfovibrio	80% Study
3a91cf3ba8b609508f53f1c961d0595b	CAGTGGGGAATATTGCGCAATGGGCGAAAGCCTGACGCAGCGACGCCGCGTGAGGGATGAAGGTCTTCGGATCGTAAACCTCTGTCAGAAGGGAAGAACGTACTGTGTGCTAATCAGCGCAGTAGTGACG	Biasalto	Desulfovibrio	80% Study
cf7471ae322a2e04c76bfdd000a214ab	CAGTGGGGAATATTGCGCAATGGGCGAAAGCCTGACGCAGCGACGCCGCGTGAGGGATGAAGGTCTTCGGATCGTAAACCTCTGTCAGAAGGGAAGAAACCGGAGTGTGCTAATCAGCACTCCATTGACG	Biasalto	Desulfovibrio	80% Study
69fa714a1689135436be059a846236ca	CAGTGGGGAATATTGCGCAATGGGCGAAAGCCTGACGCAGCGACGCCGCGTGAGGGATGAAGGTCTTCGGATCGTAAACCTCTGTCGGGAGGGAAAAACGTACATTGTGCTAATCAGCAGTGTAGTGATG	Biasalto	Desulfovibrio	80% Study
47313d3e01db6a95726ae5f3b551891b	CAATGGGCGAAAGCCTGACGCAGCGACGCCGCGTGAGGGATGAAGGTCTTCGGATCGTAAACCTCTGTCAGAAGGGAAGAACGTACTGTGTGCTAATCAGCGCAGTAGTGACGGTACCTTCAAAGGAAGC	Biasalto	Desulfovibrio	80% Study
db2746d1c000f7314a8f7b92c3cbfd99	CAATGGGCGAAAGCCTGACGCAGCAACGCCGCGTGAGGGATGAAGGTCTTCGGATCGTAAACCTCTGTCGGGAGGGAAAAACGTGCAGTGTGCTAATCAGCATTGCAGTGATGGTACCTCCAAAGGAAGC	Biasalto	Desulfovibrio	80% Study
149e2916eca88b74713e7fb41d2a25fb	CAATGGGCGAAAGCCTGACGCAGCGACGCCGCGTGAGGGATGAAGGTCTTCGGATCGTAAACCTCTGTCAGAAGGGAAGAAACTAGGGTGCTCTAATCATCATCCTACTGACGGTACCTTCAAAGGAAGC	Biasalto	Desulfovibrio	80% Study
203c9709fd7b98ce2614c13210bbb764	CAGTGAGGAATATTGGTCAATGGCCGGAAGGCTGAACCAGCCAAGTCGCGTGAGGGAAGACTGCCCTATGGGTTGTAAACCTCTTTTGCAAGGGAAGAATAAGGGTTACGTGTAGCCCGATGCCAGTACT	Biasalto	Odoribacter	80% Study
9d61816f508bf7123b773564cceb2eab	CAGTGAGGAATATTGGTCAATGGGCGAGAGCCTGAACCAGCCAAGTCGCGTGAGGGATGACTGCCCTATGGGTTGTAAACCTCTTTTGCAAGGGAAGAATAAGCCTTACGTGTAAGGCGATGCCTGTACC	Biasalto	Odoribacter	80% Study
5046607ba125af22ce22598a4d1b915a	CAGTGAGGAATATTGGTCAATGGTCGAGAGACTGAACCAGCCAAGTCGCGTGAGGGAAGAATGGTCCATGGCCTGTAAACCTCTTTTGACGGGGACGAATAAAGGGAACGTGTTCCCTCTTGCCGGTACC	Biasalto	Odoribacter	80% Study
3374a68dcf2458df51c5f0bd52f9d70b	CAGTGAGGAATATTGGTCAATGGCCGGAAGGCTGAACCAGCCAAGTCGCGTGAGGGAAGACTGCCCTATGGGTTGTAAACCTCTTTTGCAAGGGAAGAATAAGGGCTACGTGTAGCCCGATGCCAGTACT	Biasalto	Odoribacter	80% Study
ae66cddace2624d35132785f46a0d858	CAGTGAGGAATATTGGTCAATGGTCGAGAGACTGAACCAGCCAAGTCGCGTGAGGGAAGAATGGTCCATGGCCTGTAAACCTCTTTTGACGGGGACGAATAAAGGGAACGCGTTCCCTCTTGCCGGTACC	Biasalto	Odoribacter	80% Study
31de8208e44d88a96eaf58848c535ec0	CAGTGAGGAATATTGGTCAATGGGCGAGAGCCTGAACCAGCCAAGTCGCGTGAGGGAAGACTGCCCTATGGGTTGTAAACCTCTTTTGCAAGGGAAGAATAAGCCTTACGAGTAGGGCGATGCCTGTACC	Biasalto	Odoribacter	80% Study
0aa4bb99aed5c579409a93205721789b	CAATGGCCGGAAGGCTGAACCAGCCAAGTCGCGTGAGGGAAGACTGCCCTATGGGTTGTAAACCTCTTTTGCAAGGGAAGAATAAGGGTTACGTGTAGCCCGATGCCAGTACTTTGCGAATAAGCATCGG	Biasalto	Odoribacter	80% Study
35ce2f1334675edb50e6d8062965c595	CAATGGCCGGAAGGCTGAACCAGCCAAGTCGCGTGAGGGAAGACTGCCCTATGGGTTGTAAACCTCTTTTGCAAGGGAAGAATAAGGGCTACGTGTAGCCCGATGCCAGTACTTTGCGAATAAGCATCGG	Biasalto	Odoribacter	80% Study
e5eea7c36e196cb1e32e7590ca104082	CAATGGCCGGAAGGCTGAACCAGCCAAGTCGCGTGAGGGAAGACTGCCCTATGGGTTGTAAACCTCTTTTGCAAGGGAAGAATAAGGGCTACGCGTAGCCCGATGCCAGTACTTTGCGAATAAGCATCGG	Biasalto	Odoribacter	80% Study
6206668e13d65301a32e590ab7f69f42	CAGTGGGGAATATTGCACAATGGGGGAAACCCTGATGCAGCGACGCCGCGTGGAGGAAGAAGGTCTTCGGATTGTAAACTCCTGTTGTTGGGGAAAAGAAGGATGGTACCCAACAAGGAAGTGACGGCTA	Biasalto	Faecalibacterium	80% Study
fc0c0312f6f0d1dfb9d9876438385ee6	CAGTGGGGAATATTGCACAATGGGGGAAACCCTGATGCAGCGACGCCGCGTGGAGGAAGAAGGTCTTCGGATTGTAAACTCCTGTTGTTGAGGAAAAAGAGGATGGTACTCAACAAGGAAGTGACGGCTA	Biasalto	Faecalibacterium	80% Study
d2184b9aba3a7e48712b6a8240d01ed8	CAGTGGGGAATATTGCACAATGGGGGGAACCCTGATGCAGCGACGCCGCGTGGAGGAAGAAGGTCTTCGGATTGTAAACTCCTGTTGTTGGGGAAAAGAAGGATGGTACCCAACAAGGAAGTGACGGCTA	Biasalto	Faecalibacterium	80% Study
c55f67b311e7cd7a27b90bd9a0795984	AGTGGGGAATATTGCACAATGGGGGAAACCCTGATGCAGCGACGCCGCGTGGAGGAAGAAGGTCTTCGGATTGTAAACTCCTGTTGTTGGGGAAAAGAAGGATGGTACCCAACAAGGAAGTGACGGCTAA	Biasalto	Faecalibacterium	80% Study
9a412458a6dc5697a88c3cb511c15d74	CAATGGGGGAAACCCTGATGCAGCGACGCCGCGTGGAGGAAGAAGGTCTTCGGATTGTAAACTCCTGTTGTTGGGGAAAAGAAGGATGGTACCCAACAAGGAAGTGACGGCTAACTACGTGCCAGCAGCC	Biasalto	Faecalibacterium	80% Study
ac4bf7183c04f14dfe5ff5b33f9e199a	CAATGGGGGAAACCCTGATGCAGCGACGCCGCGTGGAGGAAGAAGGTCTTCGGATTGTAAACTCCTGTTGTTGAGGAAAAAGAGGATGGTACTCAACAAGGAAGTGACGGCTAACTACGTGCCAGCAGCC	Biasalto	Faecalibacterium	80% Study
4f363419a78a771969b7790a4691fc16	CAATGGGGGAAACCCTGATGCAGCGACGCCGCGTGGAGGAAGAAGGTCTTCGGATTGTAAACTCCTGTTGTTGGGGAAAAAGAGGATGGTACCCAACAAGGAAGTGACGGCTAACTACGTGCCAGCAGCC	Biasalto	Faecalibacterium	80% Study
dc846579894eb4d82db9b190dbeab518	CAGTGAGGAATATTGGTCAATGGACGCAAGTCTGAACCAGCCATGCCGCGTGCAGGAAGACGGCTCTATGAGTTGTAAACTGCTTTTGTACGAGGGTAAACTCAGATACGTGTATCTGACTGAAAGTACC	Biasalto	Alistipes	80% Study
7a5a01239dc71e8f4b6cae247ee12f6d	CAGTGAGGAATATTGGTCAATGGACGCAAGTCTGAACCAGCCATGCCGCGTGCAGGAAGACGGCTCTATGAGTTGTAAACTGCTTTTGTACGAGGGTAAACTCAGATACGTGTATCTGACTGAAAGTATC	Biasalto	Alistipes	80% Study
6dc08089643c8ad0317240640024b6a4	CAGTGAGGAATATTGGTCAATGGACGCAAGTCTGAACCAGCCATGCCGCGTGCAGGAAGACGGCTCTATGAGTTGTAAACTGCTTTTGTACGAGGGTAAACCCGGGTACACGTACCCGGCTGAAAGTATC	Biasalto	Alistipes	80% Study
b2c9ac9507a0665adbcaba07aa4962c5	CAGTGAGGAATATTGGTCAATGGACGCAAGTCTGAACCAGCCATGCCGCGTGCAGGAAGAATGTGCTATGCATTGTAAACTGCTTTTGTACGAGGGTAATAACAGGTACGTGTACCTGGATGAAAGTATC	Biasalto	Alistipes	80% Study
56115473e8381c17be2f1cffd096bd99	CAGTGAGGAATATTGGTCAATGGACGCAAGTCTGAACCAGCCATGCCGCGTGCAGGAAGACGGCTCTATGAGTTGTAAACTGCTTTTGTACGAGGGTAAACTCACCTACGTGTAGGTGACTGAAAGTATC	Biasalto	Alistipes	80% Study
9c5f95958ca143bda0a6a47f7139e542	CAGTGGGGAATTTTGCGCAATGCTCGGTAGAGTGACGCAGCGACGCCGCGTGAATGACGAAGGCCTTCGGGTCGTAAAGTTCTTTCGACAGGGAAGAAAATGTGTATGAGTAACTGCATACGTAGTGACG	Biasalto	Mucispirillum	80% Study
93656de73a79f466b64b280432406083	CAGTGGGGAATTTTGCGCAATGCTCGGTAGAGTGACGCAGCGACGCCGCGTGAATGACGAAGGCCTTCGGGTCGTAAAGTTCTTTCGACAGGGAAGAAAATGCGTATGAGTAACTGCATACGTAGTGACG	Biasalto	Mucispirillum	80% Study
4c085022ebad4bd6e537d0e60f0a9bf7	CAGTGGGGAATTTTGCGCAATGCTCGGTAGAGTGACGCAGCGACGCCGCGTGAATGACGAAGGCCTTCGGGTCGTAAAGTTCTTTCGACAGGGAAGAAAATGCGTATGAGTAACTGCGTACGTAGTGACG	Biasalto	Mucispirillum	80% Study
276b8d1ae50e8e360f047f9f3721b8dc	CAATGCTCGAGAGAGTGACGCAGCGACGCCGCGTGAATGACGAAGGCCTTCGGGTCGTAAAGTTCTTTCGACAGGGAAGAATGTGTATAGTAGTAACTGACTATACAGTGACGGTACCTGTATAAGCAGC	Biasalto	Mucispirillum	80% Study
fb2886523d5a6fc607ccffea23901bd9	CAATGCTCGTTAGAGTGACGCAGCGACGCCGCGTGAATGACGAAGGCCTTCGGGTCGTAAAGTTCTTTCGACAGGGAAGAAAATGCGTATGAGTAACTGCATACGTAGTGACGGTACCTGTATAAGCAGC	Biasalto	Mucispirillum	80% Study
e1cf262c3b0557d82a4f05cb7ceecf98	CAATGCTCGGTAGAGTGACGCAGCGACGCCGCGTGAATGACGAAGGCCTTCGGGTCGTAAAGTTCTTTCGACAGGGAAGAAAATGCGTATGAGTAACTGCGTACGTAGTGACGGTACCTGTATAAGCAGC	Biasalto	Mucispirillum	80% Study
91f889d164ce72ac0204e982e1efaf88	AGCGCAGGCGGGAAACTAAGCGGATCTTAAAAGTGCGGGGCTCAACCCCGTGAGGGGGTCCGAACTGGTTTTCTTGAGTGCAGGAGAGGAAAGCGGAATTCCCAGTGTAGCGGTGAAATGCGTAGATATT	Costa	Megamonas	80% Study
5267ee6f263948271e9e558140cae589	AGCGCAGGCGGGAAACTAAGCGGATCTTAAAAGTGCGGGGCTCAACCCCGTGATGGGGTCCGAACTGGTTTTCTTGAGTGCAGGAGAGGAAAGCGGAATTCCCAGTGTAGCGGTGAAATGCGTAGATATT	Costa	Megamonas	80% Study
1ce095d7454935e6bd073e5f42806b9a	AGCGCAGGCGGGAAGTTAAGCGGACTTTAAAAGTGCGGGGCTCAACCCCGTGAGGGGGTCCGAACTGACTTTCTTGAGTGCAGGAGAGGGAAGCGGAATTCCTAGTGTAGCGGTGAAATGCGTAGATATT	Costa	Megamonas	80% Study
c16260d1a3c7a3ed9293a20ffc54745d	AGCGCAGGCGGGGAACTAAGCGGATCTTAAAAGTGCGGGGCTCAACCCCGTGAGGGGGTCCGAACTGGTTTTCTTGAGTGCAGGAGAGGAAAGCGGAATTCCCAGTGTAGCGGTGAAATGCGTAGATATT	Costa	Megamonas	80% Study
315f3f89a705710f453e9b4c95bba752	AGCGTAGGCGGGAAACTAAGCGGATCTTAAAAGTGCGGGGCTCAACCCCGTGAGGGGGTCCGAACTGGTTTTCTTGAGTGCAGGAGAGGAAAGCGGAATTCCCAGTGTAGCGGTGAAATGCGTAGATATT	Costa	Megamonas	80% Study
668b7f9bc9d1071a828512ab80dc07bf	CAATGGGCGAAAGCCTGACGGAGCAACGCCGCGTGAACGATGAAGGTCTTAGGATCGTAAAGTTCTGTTGTTAGGGACGAAGGGTAAGAATCATAATACGGTTTTTATTTGACGGTACCTAACGAGGAAG	Costa	Megamonas	80% Study
1d8575369f31dff32eda730cc5da3838	CAATGGGCGAAAGCCTGACGGAGCAACGCCGCGTGAACGAAGAAGGTCTTAGGATCGTAAAGTTCTGTTGTTAGGGGCGAAGGGCGATAGTTTAAATAAGGCTATTGTTTGACGGTACTTAACGAGGAAG	Costa	Megamonas	80% Study
8121626c102f0e7ad488674bd531c7e5	CAATGGGCGAAAGCCTGACGGAGCAACGCCGCGTGAACGATGAAGGTCTTAGGATCGTAAAGTTCTGTTGTTAGGGACGAAGGGTAAGAATCATAATAAGGTTTTTATTTGACGGTACCTAACGAGGAAG	Costa	Megamonas	80% Study
b765e1ee4de1c5a578e23a7ac8408da8	CAATGGGCGAAAGCCTGACGGAGCAACGCCGCGTGAACGAAGAAGGTCTTAGGATCGTAAAGTTCTGTTGTTAGGGGCGAAGGGCAACATTTTGAATAAGGGTGTTGTTTGACGGTACTTAACGAGGAAG	Costa	Megamonas	80% Study
ad7fd24de90914eae73fd58a99225146	CAATGGGCGAAAGCCTGACGGAGCAACGCCGCGTGAACGATGAAGGTCTTAGGATCGTAAAGTTCTGTTGTTAGGGACGAAGGGTAAGAATAATAATACGGTTTTTATTTGACGGTACCTAACGAGGAAG	Costa	Megamonas	80% Study
73fc887a7d0d78d0dd664a322350947f	CAATGGGCGAAAGCCTGACGGAGCAACGCCGCGTGAATGAAGAAGGTCTTAGGATCGTAAAGTTCTGTTGTTAGGGGCGAAGGGCAACATTTTGAATAAGGGTGTTGTTTGACGGTACTTAACGAGGAAG	Costa	Megamonas	80% Study
126bdaa96820007fba0c2481590977db	CAATGGGCGAAAGCCTGACGGAGCAACGCCGCGTGAACGAAGAAGGTCTTAGGATCGTAAAGTTCTGTTGTTAGGGGCGAAGGGTGCTACTTTGAATAAGGGTAGTATTTGACGGTACTTAACGAGGAAG	Costa	Megamonas	80% Study
bacd25946445cc042595c8aed73defe6	CGTGTAGGCGGGCTGGCAAGTCAGATGTGAAAACCATGGGCTCAACCCATGGCCTGCATTTGAAACTGTTGGTCTTGAGTGCTGGAGAGGCAATCGGAATTCCGTGTGTAGCGGTGAAATGCGTAGATAT	Costa	Oscillospira	80% Study
393f4701dca1b3649c4b0e55176e45ba	CGTGTAGGCGGGATTGCAAGTCAGATGTGAAAACCACGGGCTCAACCTGTGGCCTGCATTTGAAACTGCAGTTCTTGAGTACTGGAGAGGCAGACGGAATTCCTAGTGTAGCGGTGAAATGCGTAGATAT	Costa	Oscillospira	80% Study
6c8898ad709fa5d93432d8a3a4dc3399	CGTGTAGGCGGGACTGCAAGTCAGATGTGAAAACTATGGGCTCAACCCATAGCCTGCATTTGAAACTGTAGTTCTTGAGTGCTGGAGAGGCAATCGGAATTCCGTGTGTAGCGGTGAAATGCATAGATAT	Costa	Oscillospira	80% Study
f1a326685cceaa3fdc388c9196b68582	CGTGTAGGCGGGACTGCAAGTCAGGTGTGAAAACCACGGGCTCAACCTGTGGCCTGCATTTGAAACTGTAGTTCTTGAGTGCTGGAGAGGCAATCGGAATTCCGTGTGTAGCGGTGAAATGCGTAGATAT	Costa	Oscillospira	80% Study
d104c902217ae6a349a88d35deb26fc3	CGTGCAGCCGGGCTGGTAAGTCAGATGTGAAATCTGGAGGCTCAACCTCCAAACTGCATTTGAAACTGCTGGTCTTGAGTACCGGAGAGGTTATCGGAATTCCTTGTGTAGCGGTGAAATGCGTAGATAT	Costa	Oscillospira	80% Study
04581da39c02ff0ba41992b12f2840dc	CGTGCAGCCGGGCCGGCAAGTCAGATGTGAAATCTGGAGGCTTAACCTCCAAACTGCATTTGAAACTGTTGGTCTTGAGTACCGGAGAGGTTATCGGAATTCCTTGTGTAGCGGTGAAATGCGTAGATAT	Costa	Oscillospira	80% Study
fa84c70e00f2714b1f5959185ce83a5f	CGTGTAGGCGGGACTGCAAGTCAGATGTGAAAACCACGGGCTCAACCTGTGGCCTGCATTTGAAACTGTAGTTCTTGAGTGTCGGAGAGGCAATCGGAATTCCGTGTGTAGCGGTGAAATGCGTAGATAT	Costa	Oscillospira	80% Study
16d0d1f5ec634f67ca631e5292782614	CGTGTAGGCGGGAAGGCAAGTCAGATGTGAAAACTATGGGCTCAACCCATAGCCTGCATTTGAAACTGTTTTTCTTGAGTGATGGAGAGGCAGGCGGAATTCCGTGTGTAGCGGTGAAATGCGTAGATAT	Costa	Oscillospira	80% Study
78dc2be4d19e53261fcf3bdc686cb000	CGTGTAGGCGGGATTGTAAGTCAGATGTGAAAACCAGGGGCTCAACCTCTGGCCTGCATTTGAAACTGCAGTTCTTGAGTACTGGAGAGGCAGACGGAATTCCTAGTGTAGCGGTGAAATGCGTAGATAT	Costa	Oscillospira	80% Study
68d2ebafe654bfcd92079aee27adaa64	CGTGTAGCCGGGGAGACAAGTCAGATGTGAAATCTGGAGGCTCAACCTCCAAACTGCATTTGAAACTGTTTCTCTTGAGTATCGGAGAGGTAATCGGAATTCCTAGTGTAGCGGTGAAATGCGTAGATAT	Costa	Oscillospira	80% Study
944d79c7a553212cde6611f3d4e77f04	CGTGTAGGCGGGACTGCAAGTCAGGTGTGAAAACTATGGGCTCAACCCATAGCCTGCACTTGAAACTGTAGTTCTTGAGTGCTGGAGAGGCAATCGGAATTCCGTGTGTAGCGGTGAAATGCGTAGATAT	Costa	Oscillospira	80% Study
87a740099e0a16a60dd3ba90b14516da	CGTGTAGGCGGGATTGCAAGTCAGGCGTGAAAACTATGGGCTCAACCCATAGCCTGCGTTTGAAACTGTAGTTCTTGAGTGCTGGAGAGGCAATCGGAATTCCGTGTGTAGCGGTGAAATGCATAGATAT	Costa	Oscillospira	80% Study
bd8e194f3bfe4a1aac48ffd59c9cf2f4	CGTGTAGGCGGGATGGTAAGTCAGATGTGAAAACTATGGGCTCAACTCATAGCCTGCATTTGAAACTGCTGTTCTTGAGTACTGGAGAGGCAGACGGAATTCCTAGTGTAGCGGTGAAATGCGTAGATAT	Costa	Oscillospira	80% Study
47fbfb1104923beef394793d80487b23	CGTGTAGGCGGGAGTGTAAGTCAGATGTGAAAACTATGGGCTCAACCCATAGCCTGCATTTGAAACTGCATTTCTTGAGTACTGGAGAGGCAGACGGAATTCCTAGTGTAGCGGTGAAATGCGTAGATAT	Costa	Oscillospira	80% Study
548bb244ed13187aef165437def106e1	CGTGTAGGCGGGATTGCAAGTCAGATGTGAAAACCAGGGGCTCAACCTCTGGCCTGCATTTGAAACTGTAGTTCTTGAGTGCTGGAGAGGCAATCGGAATTCCGTGTGTAGCGGTGAAATGCGTAGATAT	Costa	Oscillospira	80% Study
8b6a352961e41284050c37764977fc80	CGTGTAGGCGGGAGTGCAAGTCAGATGTGAAAACTATGGGCTCAACCCATAGCCTGCATTTGAAACTGTACTTCTTGAGTACTGGAGAGGCAGGCGGAATTCCGTGTGTAGCGGTGAAATGCGTAGATAT	Costa	Oscillospira	80% Study
97e71966122d33f409d6ba194ad1bb51	CGTGTAGGCGGGATTGCAAGTCAGACGTGAAAACTATGGGCTCAACCCATAGCCTGCGTTTGAAACTGTAGTTCTTGAGTGCTGGAGAGGCAATCGGAATTCCGTGTGTAGCGGTGAAATGCGTAGATAT	Costa	Oscillospira	80% Study
c27e83bd802eb55b73ee643ef44dc532	CGTGTAGGCGGGATGGCAAGTCAGATGTGAAACCCACGGGCTCAACCCATGGCCTGCATTTGAAACTGTCGTTCTTGAGTACTGGAGAGGCAGACGGAATTCCTAGTGTAGCGGTGAAATGCGTAGATAT	Costa	Oscillospira	80% Study
35727e80476f635a5d9a4e079cace765	CGTGTAGGCGGGACTGCAAGTCAGATGTGAAAACCAGGGGCTCAACCTCTGGCCTGCATTTGAAACTGTAGTTCTTGAGTGCTGGAGAGGCAATCGGAATTCCGTGTGTAGCGGTGAAATGCGTAGATAT	Costa	Oscillospira	80% Study
bf4cdd8ad072d7020297cffadc174c4a	CGTGCAGCCGGGCTGGTAAGTCAGATGTGAAATCCGTGGGCTCAACCCGCGAACTGCATTTGAAACTGCTGGTCTTGAGTACCGGAGAGGTTATCGGAATTCCTTGTGTAGCGGTGAAATGCGTAGATAT	Costa	Oscillospira	80% Study
918bbd43d9fbf22fc054a810a5e94a80	CGTGTAGCCGGGAAGACAAGTCAGATGTGAAATCTGGAGGCTCAACCTCCAAACTGCATTTGAAACTGTTTTTCTTGAGTATCGGAGAGGTAATCGGAATTCCTAGTGTAGCGGTGAAATGCGTAGATAT	Costa	Oscillospira	80% Study
95b2ebe28dd20c58a0f7ef541a1e17d8	CGTGTAGGCGGGACTGCAAGTCAGATGTGAAAACCATGGGCTCAACCTGTGGCCTGCATTTGAAACTGTAGTTCTTGAGTGTCGGAGAGGCAATCGGAATTCCGTGTGTAGCGGTGAAATGCGTAGATAT	Costa	Oscillospira	80% Study
8d757ce4b5faefd5da9d3f5f45f534bd	CGTGTAGGCGGGACCGCAAGTCAGATGTGAAAACTATGGGCTCAACCCATAGCCTGCATTTGAAACTGTGGTTCTTGAGTGCTGGAGAGGCAATCGGAATTCCGTGTGTAGCGGTGAAATGCGTAGATAT	Costa	Oscillospira	80% Study
59bf52bbaa56cc83d486d7c3fdead54d	CGTGTAGGCGGGACTGCAAGTCAGATGTGAAAACTATGGGCTCAACCCATAGCCTGCATTTGAAACTGTAGTTCTTGAGTGCTGGAGAGGCAATCGGAATTCCGTGTGTAGCGGTGAAATGCGTAGATAT	Costa	Oscillospira	80% Study
9ce8ca013b64953cf638469e2b4df372	CGTGTAGGCGGGACTGCAAGTCAGATGTGAAAACCATGGGCTCAACCCATGGCCTGCATTTGAAACTGTAGTTCTTGAGTGCTGGAGAGGCAATCGGAATTCCGTGTGTAGCGGTGAAATGCGTAGATAT	Costa	Oscillospira	80% Study
2634f5f8d193718eded2659918b0b582	CGTGTAGGCGGGACGGCAAGTCAGATGTGAAAACTATGGGCTCAACTCATAGCCTGCATTTGAAACTGCTGTTCTTGAGTGCTGGAGAGGCAATCGGAATTCCGTGTGTAGCGGTGAAATGCGTAGATAT	Costa	Oscillospira	80% Study
6fecbe650326797c9aa2dd4c767ee623	CGTGTAGGCGGGATGGCAAGTCAGATGTGAAAACCATGGGCTCAACCCATGGCCTGCATTTGAAACTGTCGTTCTTGAGTACTGGAGAGGCAGACGGAATTCCTAGTGTAGCGGTGAAATGCGTAGATAT	Costa	Oscillospira	80% Study
638816134de00bb98b3988db4c678a7e	CGTGTAGGCGGGCGAGCAAGTCAGATGTGAAATTCCAGGGCTCAACCCTGGAACTGCATTTGAAACTGTTGGTCTTGAGTGCTGGAGAGGCAATCGGAATTCCGTGTGTAGCGGTGAAATGCGTAGATAT	Costa	Oscillospira	80% Study
802359f85fc9a616c770e397ea1ae673	CGTGTAGGCGGGATTGCAAGTCAGATGTGAAAACCACGGGCTCAACCTGTGGCCTGCATTTGAAACTGTAGTTCTTGAGTACTGGAGAGGCAGACGGAATTCCTAGTGTAGCGGTGAAATGCGTAGATAT	Costa	Oscillospira	80% Study
66e8086d3f06896f1945cf05fae28eba	CGTGTAGGCGGGATGGCAAGTCAGATGTGAAACCCATGGGCTCAACCCATGGCCTGCATTTGAAACTGTCGTTCTTGAGTACTGGAGAGGCAGACGGAATTCCTAGTGTAGCGGTGAAATGCGTAGATAT	Costa	Oscillospira	80% Study
0ed8f2f6f52ca7e71300cb2525126d84	CGTGTAGGCGGGATTGCAAGTCAGATGTGAAAACCATGGGCTCAACTCATGGCCTGCATTTGAAACTGTAGTTCTTGAGTACTGGAGAGGCAGACGGAATTCCTAGTGTAGCGGTGAAATGCGTAGATAT	Costa	Oscillospira	80% Study
7853989fc688b6030f9aabd32a88cc8f	CGTGTAGGCGGGATTGCAAGTCAGATGTGAAAACTATGGGCTCAACCCATAGCCTGCATTTGAAACTGTAGTTCTTGAGTGCTGGAGAGGCAATCGGAATTCCGTGTGTAGCGGTGAAATGCGTAGATAT	Costa	Oscillospira	80% Study
a463dfb81ebca4b635779540f658c250	CGTGTAGGCGGGATTGTAAGTCAGATGTGAAAACCAGGGGCTCAACTTCTGGCCTGCATTTGAAACTGCAGTTCTTGAGTACTGGAGAGGCAGACGGAATTCCTAGTGTAGCGGTGAAATGCGTAGATAT	Costa	Oscillospira	80% Study
8d3df9d62f2f06a84971cc1c9efda620	CGTGTAGGCGGGATTGCAAGTCAGATGTGAAAACTAGAGGCTCAACCTCTAGCCTGCATTTGAAACTGTAGTTCTTGAGTACTGGAGAGGCAGACGGAATTCCTAGTGTAGCGGTGAAATGCGTAGATAT	Costa	Oscillospira	80% Study
4f8144504c9e9ede160bf7da23cdf005	CGTGTAGGCGGGATGGCAAGTCAGATGTGAAAACCACGGGCTCAACCTGTGGCCTGCATTTGAAACTGCTGTTCTTGAGTGATGGAGAGGCAGGCGGAATTCCGTGTGTAGCGGTGAAATGCGTAGATAT	Costa	Oscillospira	80% Study
371649685d7e46aa359c65411df24611	CGTGTAGGCGGGATTGCAAGTCAGGCGTGAAAACTATGGGCTCAACCCATAGCTTGCGTTTGAAACTGTAGTTCTTGAGTGCTGGAGAGGCAATCGGAATTCCGTGTGTAGCGGTGAAATGCATAGATAT	Costa	Oscillospira	80% Study
cba6f7f89ce2c421947f4666b1c0b5d1	CGTGTAGCCGGGAGTACAAGTCAGATGTGAAATGCCGAGGCTCAACCTCGGAGCTGCATTTGAAACTGTATTTCTTGAGTACTGGAGAGGCAGACGGAATTCCTAGTGTAGCGGTGAAATGCGTAGATAT	Costa	Oscillospira	80% Study
eeddcb87694f0bae855c39b17a737f45	CGTGTAGGCGGGCTGGCAAGTCAGATGTGAAAACCAGGGGCTCAACCTCTGGCCTGCATTTGAAACTGCTGGTCTTGAGTGCTGGAGAGGCAATCGGAATTCCGTGTGTAGCGGTGAAATGCGTAGATAT	Costa	Oscillospira	80% Study
844f15c9cc54ff4244d84490a6ce486f	CGTGTAGGCGGGATTGCAAGTCAGGCGTGAAAACTATGGGCTCAACCCATAGCCTGCGTTTGAAACTGTAGTTCTTGAGTGCTGGAGAGGCAATCGGAATTCCGTGTGTAGCGGTGAAATGCGTAGATAT	Costa	Oscillospira	80% Study
d2a6cd7c31445613acaa230a7f2a031d	CGTGTAGGCGGGAATGTAAGTCAGATGTGAAAACTATGGGCTCAACCCATAGCCTGCATTTGAAACTGCATTTCTTGAGTACTGGAGAGGCAGACGGAATTCCTAGTGTAGCGGTGAAATGCGTAGATAT	Costa	Oscillospira	80% Study
fdb879447526d3cbcbc19735ee78a7b5	CAATGGGCGCAAGCCTGACCCAGCAACGCCGCGTGAAGGAAGAAGGCCCTCGGGTTGTAAACTTCTTTTGTCAGGGACGAAGCAAGTGACGGTACCTGACGAATAAGCCACGGCTAACTACGTGCCAGCA	Costa	Oscillospira	80% Study
82da4148485d6eb448efa10e42ec1d47	CAATGGGCGCAAGCCTGACCCAGCAACGCCGCGTGAAGGAAGAAGGCTTTCGGGTTGTAAACTTCTTTTGTCAGGGAACAGTAGAAGAGGGTACCTGACGAATAAGCCACGGCTAACTACGTGCCAGCAG	Costa	Oscillospira	80% Study
d7ff55a70157b9e88fa3cb92636e1cf6	CAATGGGCGAAAGCCTGACCCAGCAACGCCGCGTGAAGGAAGAAGGCTTTCGGGTTGTAAACTTCTTTTATCAGGGACGAAGGATGTGACGGTACCTGATGAATAAGCCACGGCTAACTACGTGCCAGCA	Costa	Oscillospira	80% Study
e8848b3dc781ce19d2bd7bce9c4fdd7a	CAATGGGCGCAAGCCTGACCCAGCAACGCCGCGTGAAGGAAGAAGGCTTTCGGGTTGTAAACTTCTTTTGTCAGGGACGAACAAATGACGGTACCTGACGAATAAGCCACGGCTAACTACGTGCCAGCAG	Costa	Oscillospira	80% Study
968dfccd3413010d45f277037c37f70f	CAATGGGCGCAAGCCTGACCCAGCAACGCCGCGTGAAGGAAGAAGGCTTTCGGGTTGTAAACTTCTTTTGTCAGGGAACAGTAGAAGAGGGTACCTGACGAATAAGCTCCGGCTAACTACGTGCCAGCAG	Costa	Oscillospira	80% Study
f1dc1342e68dbf404ee037deacbe7b93	CAATGGGCGCAAGCCTGACCCAGCAACGCCGCGTGAAGGAAGAAGGCTTTCGGGTTGTAAACTTCTTTTGTCAGGGAAGAGGAGAAGACTGTACCTGACGAATAAGCTCCGGCTAACTACGTGCCAGCAG	Costa	Oscillospira	80% Study
fa1815ef7d6a72eb8e6a6060b3960f31	CAATGGGCGCAAGCCTGACCCAGCAACGCCGCGTGAAGGAAGAAGGCTTTCGGGTTGTAAACTTCTTTTATTCGGGACGATAGTGACGGTACCGAATGAATAAGCCACGGCTAACTACGTGCCAGCAGCC	Costa	Oscillospira	80% Study
078e7befe5ed38e1d46644bb93805858	CAATGGGCGAAAGCCTGACCCAGCAACGCCGCGTGAAGGAAGAAGGCTTTCGGGTTGTAAACTTCTTTTATCAGGGACGAAGTAGTGACGGTACCTGATGAATAAGCTCCGGCTAACTACGTGCCAGCAG	Costa	Oscillospira	80% Study
50c6ad36b44679ed3432f29cae3aeaf9	CAATGGGCGCAAGCCTGACCCAGCAACGCCGCGTGAAGGAAGAAGGCTTTCGGGTTGTAAACTTCTTTTCTTAGGGACGAAGGAAGTGACGGTACCTAAGGAATAAGCTCCGGCTAACTACGTGCCAGCA	Costa	Oscillospira	80% Study
883c45fb8e42f84d665cbfe49b27972c	CAATGGGCGCAAGCCTGACCCAGCAACGCCGCGTGAAGGAAGAAGGCTTTCGGGTTGTAAACTTCTTTTCTTGGGGACGAAACAAATGACGGTACCTAAGGAATAAGCTCCGGCTAACTACGTGCCAGCA	Costa	Oscillospira	80% Study
833c369f9867ad1ae128212a3f5d3439	CAATGGGCGCAAGCCTGACCCAGCAACGCCGCGTGAAGGAAGAAGGCTTTCGGGTTGTAAACTTCTTTTGTCAGGGAAGATGAAAGAGACTGTACCTGACGAATAAGCCACGGCTAACTACGTGCCAGCA	Costa	Oscillospira	80% Study
a2de5a82fbe20bd5a562892b3260b387	CAATGGACGCAAGTCTGACCCAGCAACGCCGCGTGAAGGAAGAAGGCTTTCGGGTTGTAAACTTCTTTTGTCAGGGAACAGTAGAAGAGGGTACCTGACGAATAAGCCACGGCTAACTACGTGCCAGCAG	Costa	Oscillospira	80% Study
1039e01fbbd09d024e085c66093311ef	CAATGGGCGCAAGCCTGACCCAGCAACGCCGCGTGAAGGAAGAAGGCTTTCGGGTTGTAAACTTCTTTTATTCGGGACGAAGCAAGTGACGGTACCGAATGAATAAGCCACGGCTAACTACGTGCCAGCA	Costa	Oscillospira	80% Study
6013f2d680276a29488635d7857b5d11	CAATGGGCGCAAGCCTGACCCAGCAACGCCGCGTGAAGGAAGAAGGCTTTCGGGTTGTAAACTTCTTTTGTCAGGGAAGATGAACGAGACTGTACCTGACGAATAAGCCACGGCTAACTACGTGCCAGCA	Costa	Oscillospira	80% Study
75654e37d48169b3b52f63ea4e4d0601	TGCGTAGGCGGTTTGGTAAGTCAGAAGTGAAATCCATGGGCTTAACCCATGAACTGCTTTTGAAACTATCGAACTTGAGTGAAGTAGAGGTAGGCGGAATTCCCGGTGTAGCGGTGAAATGCGTAGAGAT	Costa	Ruminococcus	80% Study
e5c0d0407cca9155677405ae5eae5fd3	TGCGTAGGCGGCAGAGCAAGTCAGATGTGAAATCCGTGGGCTTAACCCACGAACTGCATTTGAAACTGTTTTGCTTGAGTGAAGTAGAGGCAGGCGGAATTCCCTGTGTAGCGGTGAAATGCGTAGAGAT	Costa	Ruminococcus	80% Study
3ba5e54117766e2085a84f41cd1b90cc	TGCGTAGGCGGTTTGGTAAGTCAGAAGTGAAATCCATGGGCTTAACCCATGAACTGCTTTTGAAACTATCGGACTTGAGTGAAGTAGAGGTAGGCGGAATTCCCGGTGTAGCGGTGAAATGCGTAGAGAT	Costa	Ruminococcus	80% Study
63331678fa4b92a7fd153057b24548c7	TGCGTAGGCGGATCTGCAAGTCAGTAGTGAAATCCCAGGGCTTAACCCTGGAACTGCTATTGAAACTGTGGGTCTTGAGTGAGGTAGAGGCAGGCGGAATTCCCGGTGTAGCGGTGAAATGCGTAGAGAT	Costa	Ruminococcus	80% Study
b7326c792251fbd44da2126d607a2823	TGCGTAGGCGGATTGGCAAGTCAGAAGTGAAATCCATGGGCTTAACCCATGAACTGCTTTTGAAACTGTTAATCTTGAGTGAAGTAGAGGTAGGCGGAATTCCCGGTGTAGCGGTGAAATGCGTAGAGAT	Costa	Ruminococcus	80% Study
749f5df73c3204beee93b41aafc9058b	TGCGTAGGCGGTTTTGCAAGTCAGGAGTGAAATCCATGGGCTTAACCCATGAACTGCTTTTGAAACTGCAAGACTTGAGTGAAGTAGAGGTAGGCGGAATTCCCGGTGTAGCGGTGAAATGCGTAGAGAT	Costa	Ruminococcus	80% Study
ebcca4a98f33eea0a368aee2894159e0	AGCGTAGACGGAGAGGCAAGTCTGATGTGAAAGGCCGGGGCTCAACCCCGGGACTGCATTGGAAACTGTTTATCTAGAGTGTCGGAGAGGCAAGTGGAATTCCTAGTGTAGCGGTGAAATGCGTAGATAT	Costa	Ruminococcus	80% Study
b6fa44db1450fbbaeec1d8bf89ea0596	TGCGTAGGCGGCTCGGCAAGTCAGAGGTGAAATCCATGGGCTTAACCCATGAACTGCCTTTGAAACTGCCGAACTTGAGTGAAGTAGAGGTAGGCGGAATTCCCGGTGTAGCGGTGAAATGCGTAGAGAT	Costa	Ruminococcus	80% Study
97424b9cea69d55c40979480d35900f9	TGCGTAGGCGGAAGAGCAAGTCAGTAGTGAAATCTGGGGGCTTAACCCCCAAACTGCTATTGAAACTGTTTTTCTTGAGTGGAGTAGAGGTAGGCGGAATTCCCGGTGTAGCGGTGAAATGCGTAGAGAT	Costa	Ruminococcus	80% Study
ed159b31c245e53ba7768dc623afdd54	TGCGTAGGCGGAAGAGCAAGTCAGTAGTGAAATCTGGGGGCTTAACCCCCAAACTGCTATTGAAACTGTTCTTCTTGAGTGGAGTAGAGGTAGGCGGAATTCCCGGTGTAGCGGTGAAATGCGTAGAGAT	Costa	Ruminococcus	80% Study
c4c3614f3ad8c4491b18fef5c38f8e47	TGCGTAGGCGGACTGGCAAGTCAGTGGTGAAAACTATGGGCTTAACCCATAGACTGCCATTGAAACTGTTGGTCTTGAGTGAAGTAGAGGCAGGCGGAATTCCCGGTGTAGCGGTGAAATGCGTAGAGAT	Costa	Ruminococcus	80% Study
b82c1a7875574d8c599ee8447a921085	AGTGTAGGCGGGACTGCAAGTCAGGTGTGAAAACTATGGGCTTAACCCATAGACTGCACTTGAAACTGCGGTTCTTGAGTGAAGTAGAGGTAAGCGGAATTCCTAGTGTAGCGGTGAAATGCGTAGATAT	Costa	Ruminococcus	80% Study
8114b513401f950f34471d359fd6855e	TGCGTAGGCGGCCTAGCAAGTCAGGCGTGAAATACATGGGCTTAACCCATGGACTGCGCTTGAAACTGTATGGCTTGAGTGAAGTAGAGGCAGGCGGAATTCCCGGTGTAGCGGTGAAATGCGTAGAGAT	Costa	Ruminococcus	80% Study
fdd2a90935ff8ef9062974251711b1a7	TGCGTAGGCGGCAGAGCAAGTCAGGCGTGAAAACTATGGGCTTAACCCATAGCCTGCGTTTGAAACTGTTCAGCTTGAGTGAAGTAGAGGCAGATGGAATTCCCGGTGTAGCGGTGGAATGCGTAGAGAT	Costa	Ruminococcus	80% Study
10b6ff84e36132c535d24f57287f2634	TGCGTAGGCGGCAGAGCAAGTCAGATGTGAAATACACGGGCTTAACCCGTGGGCTGCATTTGAAACTGTTCAGCTTGAGTGAAGCAGAGGCAGGCGGAATTCCCGGTGTAGCGGTGAAATGCGTAGAGAT	Costa	Ruminococcus	80% Study
446ba72b75a1d0adc75d0508cb5e94a7	TGCGTAGGCGGACTGGCAAGTCAGTGGTGAAAACTATGGGCTTAACCCATAGACTGCCATTGAAACTGTTGGTCTTGAGTGAAGTAGAGGTAGGCGGAATTCCCGGTGTAGCGGTGAAATGCGTAGAGAT	Costa	Ruminococcus	80% Study
1fa0dbce9634d57c6d077f662c949caf	TGCGTAGGCGGAAAGGCAAGTCAGTAGTGAAATCTATGGGCTTAACCCATAAACTGCTATTGAAACTGTTTTTCTTGAGTGAAGTAGAGGTAGGCGGAATTCCCGGTGTAGCGGTGAAATGCGTAGAGAT	Costa	Ruminococcus	80% Study
b450419a7b24d72c28ffe853d54f4f12	TGCGTAGGCGGCTCTGCAAGTCAGTCGTGAAAACCATGGGCTCAACCCGTGGACTGCGATTGAAACTGTGGAACTTGAGTGAAGTAGAGGCAGGCGGAATTCCCGGTGTAGCGGTGAAATGCATAGAGAT	Costa	Ruminococcus	80% Study
f0d54e7a74845a34256ad03a737676bb	TGCGTAGGCGGCTTTGCAAGTCAGAAGTGAAATCCATGGGCTTAACCCATGAACTGCTTTTGAAACTGTAGAGCTTGAGTGAAGTAGAGGTAGGCGGAATTCCCGGTGTAGCGGTGAAATGCGTAGAGAT	Costa	Ruminococcus	80% Study
6aa47359bb4e9b65646e7a1a82b93f9b	TGCGTAGGCGGCTGTGCAAGTCAGGCGTGAAATGCAGGGGCTTAACCCCTGAGCTGCGTTTGAAACTGCACGGCTTGAGTGAAGTAGAGGTAGGCGGAATTCCCGGTGTAGCGGTGAAATGCGTAGAGAT	Costa	Ruminococcus	80% Study
2285139e46aeea3f7e050de7a99ae0c7	TGCGTAGGCGGAAGAGCAAGTCAGTAGTGAAATCCATGGGCTTAACCCGTGAACTGCTATTGAAACTGTTTTTCTTGAGTGAAGTAGAGGTAGGCGGAATTCCCGGTGTAGCGGTGAAATGCGTAGAGAT	Costa	Ruminococcus	80% Study
f63d762abc07310d8898f302dc855a56	TGCGTAGGCGGCAGAGCAAGTCAGATGTGAAATACACGGGCTTAACCCGTGGGCTGCATTTGAAACTGTTCAGCTTGAGTGGAGCAGAGGCAGGCGGAATTCCCGGTGTAGCGGTGAAATGCGTAGAGAT	Costa	Ruminococcus	80% Study
44367a6338c71f2fb121288f6fefc3d6	TGCGTAGGCGGAAGAGCAAGTCAGTAGTGAAATCTATGGGCTTAACCCATAAACTGCTATTGAAACTGTTTTTCTTGAGTGAAGTAGAGGTAGGCGGAATTCCCGGTGTAGCGGTGAAATGCGTAGAGAT	Costa	Ruminococcus	80% Study
d040d74d535d1c58c2a90ffb35831171	TGCGTAGGCGGATTGGCAAGTCAGTAGTGAAATCCATGGGCTTAACCCATGACGTGCTATTGAAACTGTTGATCTTGAGTGAAGTAGAGGTAAGCGGAATTCCCGGTGTAGCGGTGAAATGCGTAGAGAT	Costa	Ruminococcus	80% Study
ddda11c05cb1b39ffaff9aeae1c09bed	AGCGTAGGCGGGACTGCAAGTCAGATGTGAAAATTATGGGCTCAACCCATAACCTGCATTTGAAACTGTGGTTCTTGAGTGAAGTAGAGGTAAGCGGAATTCCTAGTGTAGCGGTGAAATGCGTAGATAT	Costa	Ruminococcus	80% Study
fd8fde14bf987f71463650917288cd9d	TGCGTAGGCGGCTAGGCAAGTCAGAAGTGAAATCCATGGGCTTAACCCATGAACTGCTTTTGAAACTGCTTAGCTTGAGTGAAGTAGAGGTAGGCGGAATTCCCGGTGTAGCGGTGAAATGCGTAGAGAT	Costa	Ruminococcus	80% Study
07b23e4d0fd135839ed08b5756b666d8	TGCGTAGGCGGCTCGGCAAGTCAGAGGTGAAATCCATGGGCTTAACCCATGAACTGCCTTTGAAACTGTCGAACTTGAGTGAAGTAGAGGTAGGCGGAATTCCCGGTGTAGCGGTGAAATGCGTAGAGAT	Costa	Ruminococcus	80% Study
b1d7ae6ee3126e20b84a27ec77ce7104	AGCGTAGACGGAGAAGCAAGTCTGGAGTGAAAACCCGGGGCTCAACCCCGGGACTGCTTTGGAAACTGTTTTTCTAGAGTGCCGGAGAGGTAAGCGGAATTCCTAGTGTAGCGGTGAAATGCGTAGATAT	Costa	Ruminococcus	80% Study
4da0e63bb6f8a46820992de04daf9ffe	TGCGTAGGCGGAAGAGCAAGTCAGTAGTGAAATCTATGGGCTTAACCCATAAACTGCTATTGAAACTGTTCTTCTTGAGTGAAGTAGAGGTAGGCGGAATTCCCGGTGTAGCGGTGAAATGCGTAGAGAT	Costa	Ruminococcus	80% Study
8e0b257708e7e2e4f9d1f5edd0ee75cf	TGCGTAGGCGGATCTGCAAGTCAGGCGTGAAATCCATGGGCTTAACCCATGAACTGCGCTTGAAACTGTGGGTCTTGAGTGAAGTAGAGGTAGGCGGAATTCCCGGTGTAGCGGTGAAATGCGTAGAGAT	Costa	Ruminococcus	80% Study
8242ccbefd9f54476f89ad9535f3f945	TGCGTAGGCGGAAGAGCAAGTCAGTAGTGAAATCTGGGGGCTTAACTCCCAAACTGCTATTGAAACTGTTCTTCTTGAGTGGAGTAGAGGTAGGCGGAATTCCCGGTGTAGCGGTGAAATGCGTAGAGAT	Costa	Ruminococcus	80% Study
5119eadb752f07239dad16fe1ef7721f	AGCGTAGACGGAGTGGCAAGTCTGGAGTGAAAACCCAGGGCTCAACCCTGGGACTGCTTTGGAAACTGTCAATCTAGAGTGCTGGAGAGGTAAGTGGAATTCCTAGTGTAGCGGTGAAATGCGTAGATAT	Costa	Ruminococcus	80% Study
659ba7c128c876257ae9e93ab1d9d993	TGCGTAGGCGGCTCTGGTAAGTTAGTGGTGAAAACTATGGGCTTAACCCATAGCCTGCCATTAAAACTGCTGGGCTTGAGTGAAGTAGAGGTAGGCGGAATTCCCGGTGTAGCGGTGAAATGCGTAGAGA	Costa	Ruminococcus	80% Study
f3ca2b44d951c1e86c7f788431480962	TGCGTAGGCGGCTTTGCAAGTCAGTTGTGAAATCTATGGGCTTAACCCATAGCCTGCAATTGAAACTGTAGAGCTTGAGTGAAGTAGAGGTAGGCGGAATTCCCGGTGTAGCGGTGAAATGCGTAGAGAT	Costa	Ruminococcus	80% Study
130945512d1f88ab3ba0b87ea3ae6c18	TGCGTAGGCGGCTCGGCAAGTCAGAGGTGAAATCCATGGGCTTAACCCATGAACTGCCTTTGAAACTGCCGGACTTGAGTGAAGTAGAGGTAGGCGGAATTCCCGGTGTAGCGGTGAAATGCGTAGAGAT	Costa	Ruminococcus	80% Study
ec12623cb62ea202787d5a8b47891413	AGCGCAGGCGGGATGGCAAGTCAGATGTGAAACCTATGGGCTCAACCCATAGACTGCATTTGAAACTGTTGTTCTTGAGTGAGGTAGAGGTAAGCGGAATTCCTGGTGTAGCGGTGAAATGCGTAGAGAT	Costa	Ruminococcus	80% Study
5859f8843e350141784437a03e61b866	TGCGTAGGCGGCTTTGCAAGTCAGATGTGAAATCTATGGGCTCAACCCATAAACTGCATTTGAAACTGTAGAGCTTGAGTGAAGTAGAGGCAGGCGGAATTCCCCGTGTAGCGGTGAAATGCGTAGAGAT	Costa	Ruminococcus	80% Study
0211b4ca7f53205891c49ade94d36d94	CAATGGGGGAAACCCTGAACCAGCAACGCCGCGTGAGGGAAGACGGTTTTCGGATTGTAAACCTCTGTCCTCTGTGAAAATGATGATGGTAGCAGAGGAGGAAGCTCCGGCTAACTACGTGCCAGCAGCC	Costa	Ruminococcus	80% Study
bd6bbef5e63fae426c58288b581c0292	AGTGTAGGCGGGACTGCAAGTCAGGTGTGAAAACTATGGGCTTAACCCATAGACTGCACTTGAAACTGTAGTTCTTGAGTGAAGTAGAGGTAAGCGGAATTCCTAGTGTAGCGGTGAAATGCGTAGATAT	Costa	Ruminococcus	80% Study
12a39fc6fcb442b495316a0a06f97283	AACGCAGGCGGTCTTTTAAGTCTGATGTGAAAGCCTTCGGCTTAACCGGAGTAGTGCATTGGAAACTGGAAGACTTGAGTGCAGAAGAGGAGAGTGGAACTCCATGTGTAGCGGTGAAATGCGTAGATAT	Costa	Lactobacillus	80% Study
6040a9279235924ab305ef63c88a28b6	AACGCAGGCGGTTTTTTAAGTCTGATGTGAAAGCCTTCGGCTTAACCGGAGATGTGCATTGGAAACTGGAAGACTTGAGTGCAGAAGAGGAGAGTGGAACTCCATGTGTAGCGGTGAAATGCGTAGATAT	Costa	Lactobacillus	80% Study
6308f01795637ba8919b570021ba4871	AGCGCAGGCGGAAGAATAAGTCTGATGTGAAAGCCCTCGGCTTAACCGAGGAACTGCATCGGAAACTGTTTTTCTTGAGTGCAGAAGAGGAGAGTGGAACTCCATGTGTAGCGGTGGAATGCGTAGATAT	Costa	Lactobacillus	80% Study
0d8e186c537878c8830d4ad2b13ba669	AGTGCAGGCGGTTCAATAAGTCTGATGTGAAAGCCTTCGGCTCAACCGGAGAATTGCATCAGAAACTGTTGAACTTGAGTGCAGAAGAGGAGAGTGGAACTCCATGTGTAGCGGTGGAATGCGTAGATAT	Costa	Lactobacillus	80% Study
ee87413baf8767ac1bae29f75a81cc8a	AACGCAGGTGGTCTTTTAAGTCTGATGTGAAAGCCTTCGGCTTAACCGGAGTAGTGCATTGGAAACTGGAAGACTTGAGTGCAGAAGAGGAGAGTGGAACTCCATGTGTAGCGGTGAAATGCGTAGATAT	Costa	Lactobacillus	80% Study
8ab4bc6bc3cd0eb6aada31081bb75548	AGCGCAGGCGGAAAAATAAGTCTGATGTGAAAGCCCTCGGCTTAACCGAGGAACTGCATCGGAAACTGTTTTTCTTGAGTGCAGAAGAGGAGAGTGGAACTCCATGTGTAGCGGTGGAATGCGTAGATAT	Costa	Lactobacillus	80% Study
aeda2ae8ba3cde129d2e750504caad99	AGCGCAGGCGGTTGCTTAGGTCTGATGTGAAAGCCTTCGGCTTAACCGAAGAAGTGCATCGGAAACCGGGCGACTTGAGTGCAGAAGAGGACAGTGGAACTCCATGTGTAGCGGTGGAATGCGTAGATAT	Costa	Lactobacillus	80% Study
2bc68b2bd6201869e224242899c0a21e	AGCGCAGGCGGTTTTTTAAGTCTGATGTGAAAGCCTTCGGCTTAACCGGAGATGTGCATTGGAAACTGGAAGACTTGAGTGCAGAAGAGGAGAGTGGAACTCCATGTGTAGCGGTGAAATGCGTAGATAT	Costa	Lactobacillus	80% Study
7fb798786a93efe73de8e9b5486a17c9	AGCGCAGGCGGTTGTTTAGGTCTGATGTGAAAGCCTTCGGCTTAACCGAAGAAGTGCATCGGAAACCGGGCAACTTGAGTGCAGAAGAGGACAGTGGAACTCCATGTGTAGCGGTGGAATGCGTAGATAT	Costa	Lactobacillus	80% Study
2690e6e3daabea5d0eb4f60426d31270	AGCGCAGGCGGTTGTTTAGGTCTGATGTGAAAGCCTTCGGCTTAACCGAAGAAGTGCATCGGAAACCGGGCGACTTGAGTGCAGAAGAGGACAGTGGAACTCCATGTGTAGCGGTGGAATGCGTAGATAT	Costa	Lactobacillus	80% Study
e2907b8d3493fcc5bfafaa7923995b0b	AGCGCGGGCGGTTTTCTAAGTCTGATGTGAAAGCCTTCGGCTTAACCGAAGAAGTGCATCGGAAACTGGATGACTTGAGTGCAGAAGAGGGCAGTGGAACTCCATGTGTAGCGGTGGAATGCGTAGATAT	Costa	Lactobacillus	80% Study
4678d6575e5695185ba0c07e1201e1d8	AGCGCAGGCGGTTGCTTAGGTCTGATGTGAAAGCCTTCGGCTTAACCGAAGAAGGGCATCGGAAACCGGGCGACTTGAGTGCAGAAGAGGACAGTGGAACTCCATGTGTAGCGGTGGAATGCGTAGATAT	Costa	Lactobacillus	80% Study
aaf408d31f2f102219fb21a32cd88010	AACGCAGGCGGTTTTTTAAGTCTGATGTGAAAACCTTCGGCTTAACCGGAGATGTGCATTGGAAACTGGAAGACTTGAGTGCAGAAGAGGAGAGTGGAACTCCATGTGTAGCGGTGAAATGCGTAGATAT	Costa	Lactobacillus	80% Study
aa39699262551247949fdcda3b065ecb	AGCGCAGGCGGTTTTCTAAGTCTGATGTGAAAGCCTTCGGCTTAACCGGAGAAGTGCATCGGAAACTGGATAACTTGAGTGCAAGAGAGGACAGTGGAACTCCATGTGTAGCGGTGGAATGCGTAGATAT	Costa	Lactobacillus	80% Study
b5598a838645d7fbcca9878ac859e5b3	AGCGCAGGCGGTTACTTAGGTCTGATGTGAAAGCCTTCGGCTTAACCGAAGAAGTGCATCGGAAACCGGGCGACTTGAGTGCAGAAGAGGACAGTGGAACTCCATGTGTAGCGGTGGAATGCGTAGATAT	Costa	Lactobacillus	80% Study
f5fe656e43508883a978c1d5ff30649f	AGCGCAGGCGGTTTTCTAAGTCTGATGTGAAAGCCTTCGGCTTAACCGAAGAAGTGCATCGGAAACTGGATGACTTGAGTGCAGAAGAGGGCAGTGGAACTCCATGTGTAGCGGTGGAATGCGTAGATAT	Costa	Lactobacillus	80% Study
09b498bdaa205f6439af26ec9be4979e	AGCGCAGGCGGATAAATAAGTCTGATGTGAAAGCCCTCGGCTTAACCGGGGAATTGCATCGGAAACTGTCTATCTTGAGTGCAGAAGAGGAGAGTGGAACTCCATGTGTAGCGGTGGAATGCGTAGATAT	Costa	Lactobacillus	80% Study
0cb1aa5e30815db502ebcfa619fa454e	CAATGGACGCAAGTCTGATGGAGCAACGCCGCGTGAGTGAAGAAGGTTTTCGGATCGTAAAGCTCTGTTGTTGGTGAAGAAGGATAGAGGTAGTAACTGGCCTTTATTTGACGGTAATCAACCAGAAAGT	Costa	Lactobacillus	80% Study
4f462d86e0499b5c08e7b30d1a943162	CAATGGACGCAAGTCTGATGGAGCAACGCCGCGTGAGTGAAGAAGGTCTTCGGATCGTAAAACTCTGTTGTTAGAGAAGAACACGAGTGAGAGTAACTGTTCATTCGATGACGGTATCTAACCAGCAAGT	Costa	Lactobacillus	80% Study
581d192498e15b48812efa6284a4ad4b	CGCGTAGGCGGGGTAGTAAGTCAGATGTGAAATCCTATGGCTTAACCATAGAACTGCATTTGAAACTACTACTCTAGAGTATGGGAGAGGTAGGTGGAATTCTTGGTGTAGGGGTAAAATCCGTAGAGAT	Costa	Helicobacter	80% Study
caf4ef628267f7652b97d17bc4627392	CGTAGGCGGGGTAGTAAGTCAGATGTGAAATCCTATGGCTTAACCATAGAACTGCATTTGAAACTACTACTCTAGAGTATGGGAGAGGTAGGTGGAATTCTTGGTGTAGGGGTAAAATCCGTAGAGATCA	Costa	Helicobacter	80% Study
0e74b2fe2fcff23bee27f090c084dae9	CAATGGGGGAAACCCTGAAGCAGCAACGCCGCGTGGAGGATGAAGGTTTTCGGATTGTAAACTCCTTTTGTTAGAGAAGATAATGACGGTACCTAACGAATAAGCACCGGCTAACTCCGTGCCAGCAGCC	Costa	Helicobacter	80% Study
d2233f25be1fea6120147979e98e8d75	CGCGTAGGCGGATGTTTAAGTCAGGTGTGAAAACTCTGGGCTCAACCTGGAGACTGCACTTGAAACTGGATATCTTGAGGGCAGGAGAGGAAAGTGGAATTCCTAGTGTAGCGGTGAAATGCGTAGATAT	Costa	Dehalobacterium	80% Study
1d1cc58d12b3374406aeda270eecb705	CGTGTAGGCGGGGTTTTAAGCAGGATGTGAAATATATGGGCTCAACCCGTAGGCTGCATTCTGAACTGGAACTCTTGAGGGCAGGAGAGGAAAGTGGAATTCCTAGTGTAGCGGTGAAATGCGTAGATAT	Costa	Dehalobacterium	80% Study
826f2dfafba47f7f02e8a59c096c20f5	CGCGTAGGCGGGAATTTAAGTAAGGTGTGAAAACTCCGGGCTCAACTTGGAGACTGCACTTTAAACTGGATTTCTTGAGGGCAGGAGAGGAAAGTGGAATTCCTAGTGTAGCGGTGAAATGCGTAGATAT	Costa	Dehalobacterium	80% Study
82ba3dd12268da480c7243f7a47fdb9b	CGCGTAGGCGGGGTTTTAAGTAGGGTGTGAAAACTATAGGCTTAACCTGTAGACTGCATCCTAAACTGGGACTCTTGAGGGCAGGAGAGGAAAGTGGAATTCCTAGTGTAGCGGTGAAATGCGTAGATAT	Costa	Dehalobacterium	80% Study
8f0275ca30ba9bd7c1d8c5fd0c7d3daa	CGTGTAGGCGGGAATTTAAGTAAGGTGTGAAAACTCCGGGCTTAACCTGGAGACTGCACTTTAAACTGGATTTCTTGAGGGCAGGAGAGGAAAGTGGAATTCCTAGTGTAGCGGTGAAATGCGTAGATAT	Costa	Dehalobacterium	80% Study
5e6212a85615c6bcf8a4fe6222012543	CGCGTAGGCGGGAATTTAAGTTAGATGTGAAAACTAAGGGCTCAACCTTTAGACTGCATTTAAAACTGGATTTCTTGAGGGCAGGAGAGGAAAGTGGAATTCCTAGTGTAGCGGTGAAATGCGTAGATAT	Costa	Dehalobacterium	80% Study
73bd79f4de21207f0af0e95357ef0dcc	CGCGTAGGTGGACATTTAAGTCAGATGTGAAAACTCTGGGCTCAACTTGGAGATTGCATTTGAAACTGGACGTCTTGAGGGTAGGAGAGGAAAGTGGAATTCCTAGTGTAGCGGTGAAATGCGTAGATAT	Costa	Dehalobacterium	80% Study
3188b9c719b91e3fd59fdd9418c929f7	CGCGTAGGCGGGAATTTAAGTAGGGTGTGAAAACTCCGGGCTCAACCTGGAGACTGCACTTTAAACTGGATTTCTTGAGGGCAGGAGAGGAAAGTGGAATTCCTAGTGTAGCGGTGAAATGCGTAGATAT	Costa	Dehalobacterium	80% Study
75646a228ee370eb83d8c7cf90a6c441	CGCGTAGGCGGGAATTTAAGTTAGATGTGAAAACTCTGGGCTCAACCCGGGGACTGCATTTAAAACTGGATTTCTTGAGGGCAGGAGAGGAAAGTGGAATTCCTAGTGTAGCGGTGAAATGCGTAGATAT	Costa	Dehalobacterium	80% Study
c61398ad2387e8fd43a3f37319cf67c2	CGCGTAGGTGGATGTTTAAGTCAGATGTGAAAACTCCGGGCTCAACTTGGAGACTGCATTTGAAACTGGATATCTTGAGGGTAGGAGAGGAAAGTGGAATTCCTAGTGTAGCGGTGAAATGCGTAGATAT	Costa	Dehalobacterium	80% Study
803e8327208654502091575a5f915dd2	CGTGTAGGCGGGAATTTAAGTAAGGTGTGAAAACTCCGGGCTTAACCCGGAGACTGCACTTTAAACTGGATTTCTTGAGGGCAGGAGAGGAAAGTGGAATTCCTAGTGTAGCGGTGAAATGCGTAGATAT	Costa	Dehalobacterium	80% Study
781329daf97aa022e3c4a5cc69ba6afe	CGCGTAGGCGGATATTTAAGTCAGATGTGAAATCTCCGGGCTCAACCTGGAGCGTGCATTTGAAACTGGGTATCTTGAGGGCAGGAGAGGAAAGTGGAATTCCTAGTGTAGCGGTGAAATGCGTAGATAT	Costa	Dehalobacterium	80% Study
0fef5d532c638f120a863e5119e48385	CGCGTAGGCGGGGACTTAAGTTAGGTGTGAAAACTTCGGGCTTAACCTGAAGACTGCACTTAAAACTGGGTTTCTTGAGGGCAGGAGAGGAAAGTGGAATTCCTAGTGTAGCGGTGAAATGCGTAGATAT	Costa	Dehalobacterium	80% Study
7645160f1f7909bb764d86cbd61f5952	CGCGTAGGCGGATATTTAAGTCAGATGTGAAATCTCCGGGCTCAACTTGGAGCGTGCATTTGAAACTGGATATCTTGAGGGCAGGAGAGGAAAGTGGAATTCCTAGTGTAGCGGTGAAATGCGTAGATAT	Costa	Dehalobacterium	80% Study
bf9ef8353e55d1c9e586ef18178996db	CGCGTAGGCGGGTGAATAAGTCAGATGTGAAAACTCTGGGCTCAACCTGGAGACTGCATTTGAAACTGTTTATCTTGAGGGCAGGAGAGGAAAGTGGAATTCCTAGTGTAGCGGTGAAATGCGTAGATAT	Costa	Dehalobacterium	80% Study
3dd753a0843d366f4af0812dbc0c7464	CGCGTAGGTGGATATTTAAGTCAGATGTGAAAACTCCGGGCTCAACTTGGAGATTGCATTTGAAACTGGACATCTTGAGGGTAGGAGAGGAAAGTGGAATTCCTAGTGTAGCGGTGAAATGCGTAGATAT	Costa	Dehalobacterium	80% Study
a5aa0eb49d0c6d375e89c0023aeb48c0	CGCGTAGGCGGGGATTTAAGTTAGATGTGAAAACTCCGGGCTCAACCTGGAGACTGCATTTAAAACTGGATTTCTTGAGGGCAGGAGAGGAAAGTGGAATTCCTAGTGTAGCGGTGAAATGCGTAGATAT	Costa	Dehalobacterium	80% Study
c53e2719117cef6e67a9c86338a9862f	AGCGCAGGCGGGTATGCAAGTTGGGAGTGAAATACATGGGCTCAACCCATGAACTGCTCTCAAAACTGTGTATCTTGAGTAGTGCAGAGGTAGGCGGAATTCCCGGTGTAGCGGTGGAATGCGTAGATAT	Costa	Faecalibacterium	80% Study
889cf1b86016fb321c038cdab35bd4b7	AGCGCAGGCGGGGCGGCAAGTTGGAAGTGAAATCTATGGGCTCAACCCATAAACTGCTTTCAAAACTGCTGGTCTTGAGTAGTGCAGAGGTAGGCGGAATTCCCGGTGTAGCGGTGGAATGCGTAGATAT	Costa	Faecalibacterium	80% Study
e70a1cadb64d3ff6215e934f040afe06	AGCGCAGGCGGGAGAGCAAGTTGGGAGTGAAATCTATGGGCTCAACCCATAAATTGCTTTCAAAACTGCTTTTCTTGAGTAGTGCAGAGGTAGGCGGAATTCCCGGTGTAGCGGTGGAATGCGTAGATAT	Costa	Faecalibacterium	80% Study
a9f69a28b83af3c5b55f2c1e561ad5da	AGCGCAGGCGGGTATGCAAGTTGGGAGTGAAATGCATGGGCTCAACCCATGAACTGCTCTCAAAACTGTGTATCTTGAGTAGTGCAGAGGTAGGCGGAATTCCCGGTGTAGCGGTGGAATGCGTAGATAT	Costa	Faecalibacterium	80% Study
506f6f03e784e6459096378f0b3ae1da	AGCGCAGGCGGGTCTGCAAGTTGGAAGTGAAACCCATGGGCTCAACCCATGAACTGCTTTCAAAACTGCGGATCTTGAGTGGTGTAGAGGTAGGCGGAATTCCCGGTGTAGCGGTGGAATGCGTAGATAT	Costa	Faecalibacterium	80% Study
620c39b4b4ea606919ee28053f06ba49	AGCGCAGGCGGGTGTGCAAGTTGGGAGTGAAATGCATGGGCTCAACCCATGAACTGCTCTCAAAACTGTGTATCTTGAGTAGTGCAGAGGTAGGCGGAATTCCCGGTGTAGCGGTGGAATGCGTAGATAT	Costa	Faecalibacterium	80% Study
fb9604c1803f0a892ab13552c3c09fcf	AGCGCAGGCGGATTGACAAGTTGGAGGTGAAATTCATGGGCTCAACCCATGACCTGCCTTCAAAACTGTCAGTCTTGAGTGGTGTAGAGGTAGGCGGAATTCCCGGTGTAGCGGTGGAATGCGTAGATAT	Costa	Faecalibacterium	80% Study
fd94a1e53ca047c232b170b306113bea	AGCGCAGGCGGAGCTGCAAGTTGGGCGTCAAATCTACGGGCTTAACCCGTATCCGCGCTCAAAACTGTAGTTCTTGAGTAGTGCAGAGGTAGGCGGAATTCCCGGTGTAGCGGTGGAATGCGTAGATATC	Costa	Faecalibacterium	80% Study
b4a0be7f52bc50acb9e470d1ea1b37ec	AGCGCAGGCGGGTATGCAAGTTGGGAGTGAAATACATGGGCTCAACCCATGAATTGCTCTCAAAACTGTGTATCTTGAGTAGTGCAGAGGTAGGCGGAATTCCCGGTGTAGCAGTGGAATGCGTAGATAT	Costa	Faecalibacterium	80% Study
33235b49eeb03973c195313f5c5b6506	AGCGCAGGCGGGTCTGCAAGTTGGAAGTGAAACTCATGGGCTCAACCCATGAACTGCTTTCAAAACTGCGGATCTTGAGTGGTGTAGAGGTAGGCGGAATTCCCGGTGTAGCGGTGGAATGCGTAGATAT	Costa	Faecalibacterium	80% Study
f008dae80e6a37ba0a6ae25079bc268f	AGCGCAGGCGGGTAGACAAGTTGGGAGTGAAATGCATGGGCTCAACCCATGAACTGCTCTCAAAACTGTAGATCTTGAGTAGTGCAGAGGTAGGCGGAATTCCCGGTGTAGCGGTGGAATGCGTAGATAT	Costa	Faecalibacterium	80% Study
7d7e84f3338671f9aff8fe9c069535fc	AGCGCAGGCGGGAGAGCAAGTTGGAAGTGAAATCTATGGGCTCAACCCATAAATTGCTTTCAAAACTGCTTTTCTTGAGTAGTGCAGAGGTAGGCGGAATTCCCGGTGTAGCGGTGGAATGCGTAGATAT	Costa	Faecalibacterium	80% Study
d0f24248d19f39848b2c7d98ab72b5dd	AGCGCAGGCGGGAATGCAAGTTGGGAGTGAAATCTACGGGCTCAACCCGTAAACTGCTCTCAAAACTGTATTTCTTGAGTAGTGCAGAGGTAGGCGGAATTCCCGGTGTAGCGGTGGAATGCGTAGATAT	Costa	Faecalibacterium	80% Study
9a412458a6dc5697a88c3cb511c15d74	CAATGGGGGAAACCCTGATGCAGCGACGCCGCGTGGAGGAAGAAGGTCTTCGGATTGTAAACTCCTGTTGTTGGGGAAAAGAAGGATGGTACCCAACAAGGAAGTGACGGCTAACTACGTGCCAGCAGCC	Costa	Faecalibacterium	80% Study
ac4bf7183c04f14dfe5ff5b33f9e199a	CAATGGGGGAAACCCTGATGCAGCGACGCCGCGTGGAGGAAGAAGGTCTTCGGATTGTAAACTCCTGTTGTTGAGGAAAAAGAGGATGGTACTCAACAAGGAAGTGACGGCTAACTACGTGCCAGCAGCC	Costa	Faecalibacterium	80% Study
4f363419a78a771969b7790a4691fc16	CAATGGGGGAAACCCTGATGCAGCGACGCCGCGTGGAGGAAGAAGGTCTTCGGATTGTAAACTCCTGTTGTTGGGGAAAAAGAGGATGGTACCCAACAAGGAAGTGACGGCTAACTACGTGCCAGCAGCC	Costa	Faecalibacterium	80% Study
a3c01eca98586653da9d7de3602bfe3c	AGTGCAGGCGGGACGGCAAGTTGGAAGTGAAACCCATGGGCTTAACCCATGAACTGCTTTCAAAACTGCCGTTCTTGAGTGGTGCAGAGGTAGGCGGAATTCCCGGTGTAGCGGTGGAATGCGTAGATAT	Costa	Faecalibacterium	80% Study
f312c172c4a8d335a7825269bae356c1	TGCGTAGGTGGCAGGGCAAGTCAGAAGTGAAAACCCGGGGCTCAACTCCGGGACTGCTTTTGAAACTGTCCAGCTGGAGTGCAGGAGAGGTAAGCGGAATTCCTAGTGTAGCGGTGAAATGCGTAGATAT	Costa	Coprococcus	80% Study
fd4beccbb775c3d00a7c2d6e44a5b924	AGCGTAGGCGGTCTGACAAGTCAGAAGTGAAAGCCCGGGGCTCAACCTCGGGACTGCTTTTGAAACTGCCGGACTAGATTGCAGGAGAGGTAAGTGGAATTCCTAGTGTAGCGGTGAAATGCGTAGATAT	Costa	Coprococcus	80% Study
b537d8fdc3caa4f1ca9dfb72c66cde18	TGCGTAGGTGGCAGGGCAAGTCAGAAGTGAAAACCCGGGGCTCAACTCCGGGACTGCTTTTGAAACTGTCCAGCTAGAGTGCAGGAGAGGTAAGCGGAATTCCTAGTGTAGCGGTGAAATGCGTAGATAT	Costa	Coprococcus	80% Study
ec19f1115f967c62513381d7183ccdd8	AGCGCAGGCGGCGCAGTAAGTCAGAAGTGAAAGCCCGGGGCTTAACTCCGGGACTGCTTTTGAAACTGCCGTGCTTGATTTCAGGAGAGGCAAGCGGAATTCCTAGTGTAGCGGTGAAATGCGTAGATAT	Costa	Coprococcus	80% Study
ac5d1b9c512a5532817cb629fc4ce1fe	AGCGTAGGCGGTCTGACAAGTCAGAAGTGAAAGCCCAGGGCTCAACTCTGGGACTGCTTTTGAAACTGCCGGACTAGATTGCAGGAGAGGTAAGTGGAATTCCTAGTGTAGCGGTGAAATGCGTAGATAT	Costa	Coprococcus	80% Study
222c8a69e62f8aa22752fbd575aa6dcd	TGCGTAGGTGGCAGGGCAAGTCAGAAGTGAAAACCCGGGGCTTAACTCCGGGACTGCTTTTGAAACTGTCCAGCTGGAGTGCAGGAGAGGTAAGCGGAATTCCTAGTGTAGCGGTGAAATGCGTAGATAT	Costa	Coprococcus	80% Study
4cbb0b357a2f9beb377a4a464bb3d55b	AGCGTAGGCGGCCATGCAAGTCAGAAGTGAAAGCCCGGGGCTCAACCCCGGGACTGCTTTTGAAACTGTAAGGCTAGATTGCCGGAGAGGTAAGCGGAATTCCTAGTGTAGCGGTGAAATGCGTAGATAT	Costa	Coprococcus	80% Study
5904cdf70ea22617c490c96c2dd81c81	AGCGTAGGCGGCTTTGCAAGTCAGAAGTGAAAGCCCGGGGCTCAACTCCGGGACTGCTTTTGAAACTGTAGAGCTAGATTGCAGGAGAGGTAAGTGGAATTCCTAGTGTAGCGGTGAAATGCGTAGATAT	Costa	Coprococcus	80% Study
18ad6bd545062b4628b45094eb87ec4c	AGCGTAGATGGATGTTTAAGTCAGTTGTGAAAGTTTGCGGCTCAACCGTAAAATTGCAGTTGATACTGGATGTCTTGAGTGCAGTTGAGGCAGGCGGAATTCGTGGTGTAGCGGTGAAATGCTTAGATAT	Costa	Bacteroides	80% Study
209b28f9093084026536ca67141c0fe7	AGCGTAGGCGGACGCTTAAGTCAGTTGTGAAAGTTTGCGGCTCAACCGTAAAATTGCAGTTGATACTGGGTGTCTTGAGTACAGTAGAGGCAGGCGGAATTCGTGGTGTAGCGGTGAAATGCTTAGATAT	Costa	Bacteroides	80% Study
9f603ff1584e298aef8f4c6325ee5b0a	AGCGTAGGTGGACAGTTAAGTCAGTTGTGAAAGTTTGCGGCTCAACCGTAAAATTGCAGTTGATACTGGCTGTCTTGAGTACAGTAGAGGTGGGCGGAATTCGTGGTGTAGCGGTGAAATGCTTAGATAT	Costa	Bacteroides	80% Study
fb84cb1be4c3230ac71a5ae08f5dc52a	AGCGTAGGTGGATTGTTAAGTCAGTTGTGAAAGTTTGCGGCTCAACCGTAAAATTGCAGTTGAAACTGGCAGTCTTGAGTACAGTAGAGGTGGGCGGAATTCGTGGTGTAGCGGTGAAATGCTTAGATAT	Costa	Bacteroides	80% Study
c72f7c4612c8d28c075ef174071b3403	AGCGTAGGTGGACTGGTAAGTCAGTTGTGAAAGTTTGCGGCTCAACCGTAAAATTGCAGTTGATACTGTCAGTCTTGAGTACAGTAGAGGTGGGCGGAATTCGTGGTGTAGCGGTGAAATGCTTAGATAT	Costa	Bacteroides	80% Study
9fc9c6fa73dde43b31411c79e93f907f	AGCGTAGACGGGATGTCAAGTCAGCTGTGAAAGTTTGCGGCTCAACCGTAAAATTGCAGTTGAAACTGGCTTTCTTGAGTGCGTTCGAGGCAGGCGGAATTCGTGGTGTAGCGGTGAAATGCATAGATAT	Costa	Bacteroides	80% Study
6cf584cd649d11493e8ec8786a97adf7	AGCGTAGACGGCGGTTTAAGTCAGCTGTGAAATGGTGCGGCTCAACCGTAGCACTGCAGTTGAAACTGGACGGCTTGAGTGCAGTTGAGGCAGGCGGAATTCGTGGTGTAGCGGTGAAATGCTTAGATAT	Costa	Bacteroides	80% Study
cd8f8fe516d443725f832641e45604bf	AGCGTAGGCGGACTATTAAGTCAGCTGTGAAAGTTTGCGGCTCAACCGTAAAATTGCAGTTGATACTGGTCGTCTTGAGTGCAGTAGAGGTAGGCGGAATTCGTGGTGTAGCGGTGAAATGCTTAGATAT	Costa	Bacteroides	80% Study
4217394ef8da28d3637c7b47436996eb	AGCGTAGATGGATGTTTAAGTCAGTTGTGAAAGTTTGCGGCTCAACCGTAAAATTGCAGTTGATACTGGATATCTTGAGTGCAGTTGAGGCAGGCGGAATTCGTGGTGTAGCGGTGAAATGCTTAGATAT	Costa	Bacteroides	80% Study
400360c9165bcd025c07a939f72e62c9	CAATGGGCGAGAGCCTGAACCAGCCAAGTAGCGTGAAGGATGACTGCCCTACGGGTTGTAAACTTCTTTTATAAGGGAATAAAGTATTCTACGTGTAGAGTTTTGTATGTACCTTATGAATAAGCATCGG	Costa	Bacteroides	80% Study
e7c65418afc8909cb84084ffe91d55d3	CAATGGGCGAGAGCCTGAACCAGCCAAGTAGCGTGAAGGATGACTGCCCTACGGGTTGTAAACTTCTTTTATAAGGGAATAAAGTTCTCTACGTGTAGAGTTTTGTATGTACCTTATGAATAAGCATCGG	Costa	Bacteroides	80% Study
4eed35f3dafbcb34876fa75c83e91d96	CAATGGACGAGAGTCTGAACCAGCCAAGTAGCGTGAAGGATGAAGGTCCTACGGATTGTAAACTTCTTTTATAAGGGAATAAACCCTCCCACGTGTGGGAGCTTGTATGTACCTTATGAATAAGCATCGG	Costa	Bacteroides	80% Study
1bf62f2fbff25cd3ac158e2d065339b7	CAATGGGCGAGAGCCTGAACCAGCCAAGTAGCGTGAAGGATGACTGCCCTATGGGTTGTAAACTTCTTTTATACGGGAATAACACCTTCCACGTGTGGAGGGCTGCATGTACCGTATGAATAAGCATCGG	Costa	Bacteroides	80% Study
1558cc9de8364d8d57288078190b78b1	CAATGGGCGAGAGCCTGAACCAGCCAAGTAGCGTGAAGGATGACTGCCCTATGGGTTGTAAACTTCTTTTATACGGGAATAACACGCGGCACGTGTGCCGCTCTGCATGTACCGTATGAATAAGCATCGG	Costa	Bacteroides	80% Study
522b3bb04a687c8e9f1687f703d9f0e5	CAATGGGCGAGAGCCTGAACCAGCCAAGTAGCGTGAAGGATGACGGCCCTACGGGTTGTAAACTTCTTTTGTGCGGGAATAAAGGAGCCTACGTGTAGGCTTTTGCATGTACCGTAACGAATAAGCATCG	Costa	Bacteroides	80% Study
327ae0ddb5399f2a8bf13f2b68ce036d	CAATGGGCGAGAGCCTGAACCAGCCAAGTAGCGTGAAGGATGACTGCCCTATGGGTTGTAAACTTCTTTTATACGGGAATAACATCATCCACGTGTGGGTGTCTGCATGTACCGTATGAATAAGCATCGG	Costa	Bacteroides	80% Study
65e95f1b3eca715843c916386580164d	CAATGGGCGAGAGCCTGAACCAGCCAAGTAGCGTGAAGGAAGACTGCCCTATGGGTTGTAAACTTCTTTTATACGGGAATAAAGTCATCCACGTGTGGATGTTTGTATGTACCGTATGAATAAGGATCGG	Costa	Bacteroides	80% Study
f5aec87f6388c3f0d59bbef91c443ccb	CAATGGACGAGAGTCTGAACCAGCCAAGTAGCGTGAAGGATGAAGGTCCTACGGATTGTAAACTTCTTTTATAAGGGAATAAAACCTTCCACGTGTGGGAGCTTGTATGTACCTTATGAATAAGCATCGG	Costa	Bacteroides	80% Study
01e8756bd32a90dfcdd18a01e771510c	CAATGGACGAGAGTCTGAACCAGCCAAGTAGCGTGAAGGACGACTGCCCTATGGGTTGTAAACTTCTTTTATATGGGAATAAAAAAGTCCACGTGTGGATTCTTGTATGTACCATATGAATAAGCATCGG	Costa	Bacteroides	80% Study
4aa378d94b17c9166972fcdb02ebe363	AGCGTAGATGGGTTGTTAAGTCAGTTGTGAAAGTTTGCGGCTCAACCGTAAAATTGCAATTGATACTGGCAGTCTTGAGTACAGTTGAGGTAGGCGGAATTCGTGGTGTAGCGGTGAAATGCTTAGATAT	Costa	Bacteroides	80% Study
d5abfc1a5ebfd941a29eb6b4d33fe4a4	AGCGTAGACGGCGAAGCAAGTCTGAAGTGAAAACCCAGGGCTCAACCCTGGGACTGCTTTGGAAACTGTTTTGCTAGAGTGCTGGAGAGGTAAGTGGAATTCCTAGTGTAGCGGTGAAATGCGTAGATAT	Costa	Clostridium	80% Study
82adf22bcc2928ef5e73f544c16dd5ae	GGAGCAGGCGGCAGCAAGGGTCTGTGGTGAAAGGCTGAAGCTTAACTTCAGTGTGCCAGAGAAACCGGGCAGCTAGAGTGCAGGAGAGGATCGTGGAATTCCATGTGTAGCGGTGAAATGCGTAGATATA	Costa	Clostridium	80% Study
54b7794fcace34ca49cc1c876f0d1509	GGAGCAGGCGGCGGCAGAGGTCTGTGGTGAAAGACTGAAGCTTAACTTCAGTAAGCCATAGAAACCGGGCTGCTAGAGTGCAGGAGAGGATCGTGGAATTCCATGTGTAGCGGTGAAATGCGTAGATATA	Costa	Clostridium	80% Study
c294d5cc2cacf38bec57583860a06773	AGCGTAGACGGCGAAGCAAGTCCGAAGTGAAAACCCGGGGCTCAACCTCGGGACTGCTTTGGAAACTGTTTTGCTAGAGTGCTGGAGAGGTAAGTGGAATTCCTAGTGTAGCGGTGAAATGCGTAGATAT	Costa	Clostridium	80% Study
be5c6c554dbb0c0361bec2ae3e8f9495	AGCGTAGGCGGACTTTTAAGTGAGATGTGAAATACCCGGGCTCAACTTGGGTGCTGCATTTCAAACTGGAAGTCTAGAGTGCAGGAGAGGAGAATGGAATTCCTAGTGTAGCGGTGAAATGCGTAGAGAT	Costa	Clostridium	80% Study
dd31b643a75f017cade479dd6173253c	CAATGGGGGGAACCCTGACCGAGCAACGCCGCGTGAAGGAAGAAGGAATTCGTTCTGTAAACTTCTGTTATAAAGGAAGAACGGCACATATAGGGAATGATATGTGAGTGACGGTACTTTATGAGGAAGC	Costa	Clostridium	80% Study
ceb63202771c780aa160df1ceede97e5	TGAGTAGGCGGTTAAGCAAGTCATATGTGAAATTCTGGGGCTCAACCTCAGAGCTGCATAAGAAACTGTTTAACTAGAGTACAGGAGAGGTAAGCGGAATTCCTAGTGTAGCGGTGAAATGCGTAGATAT	Costa	Clostridium	80% Study
5f9e7181420fff699507d8572a80e267	TGAGTAGGCGGTTATGCAAGTCATATGTGAAATTCTGGAGCTCAACTCCAGCGCTGCATAAGAAACTGTGTAACTAGAGTACAGGAGAGGTAAGCGGAATTCCTAGTGTAGCGGTGAAATGCGTAGATAT	Costa	Clostridium	80% Study
aeb2a7d5c8965f92f676434f55898e75	TGCGTAGGTGGCACGATAAGTCTGGAGTAAAAGGGAGCGGCTCAACCGCTGTTGGCTCTGGAAACTGTCGAGCTAGAGAGCAGGAGAGGGCGATGGAATTCCATGTGTAGCGGTAAAATGCGTAGATATA	Costa	cc_115	80% Study
22178114591a88c7da56676cec1de377	TGCGTAGGTGGCACGATAAGTCTGTAGTAAAAGGCAGCGGCTCAACCGCTGTTGGCTATGGAAACTGTCGAGCTGGAGTGCAGAAGAGGGCGATGGAATTCCATGTGTAGCGGTAAAATGCGTAGATATA	Costa	cc_115	80% Study
c1f4fe75ab0e672bffddd419f8f0de9a	TGCGTAGGTGGCACGTTAAGTCTGGAGTAAAAGGGAGCGGCTCAACCGCTGTTGGCTCTGGAAACTGGCGAGCTAGAGTGCAGGAGAGGGCGATGGAATTCCATGTGTAGCGGTAAAATGCGTAGATATA	Costa	cc_115	80% Study
05175f140ee0b8dfde805a566181d9c9	TGCGTAGGTGGCACGATAAGTCTGGAGTAAAAGGGAGCGGCTCAACCGCTGTTGGCTCTGGAAACTGTCGAGCTAGAGTGCAGGAGAGGGCGATGGAATTCCATGTGTAGCGGTAAAATGCGTAGATATA	Costa	cc_115	80% Study
625901921b8a0a68dda18d9e304eb468	AGCGTAGACGGAGCAGCAAGTCTGATGTGAAAGGCAGGGGCTCAACCCCTGGACTGCATTGGAAACTGTTGATCTTGAGTACCGGAGGGGTAAGCGGAATTCCTAGTGTAGCGGTGAAATGCGTAGATAT	Costa	Blautia	80% Study
8150eb2f2900482fef76312a21bf21dd	AGCGTAGACGGAATGGCAAGTCTGATGTGAAAGGCGGGGGCTCAACCCCTGGACTGCATTGGAAACTGCCAGTCTTGAGTACCGGAGGGGTAAGCGGAATTCCTAGTGTAGCGGTGAAATGCGTAGATAT	Costa	Blautia	80% Study
2a1384847397cf9d5bb393d31c1a8e14	AGCGTAGACGGGACAGCAAGTCTGATGTGAAAGGCAGGGGCTCAACCCCTGGACTGCATTGGAAACTGTTGACCTGGAGTACCGGAGGGGTAAGCGGAATTCCTAGTGTAGCGGTGAAATGCGTAGATAT	Costa	Blautia	80% Study
aa7d04da44a46b949152dfd8f89ef795	AGCGTAGACGGCGGAGCAAGTCTGATGTGAAAGGCAGGGGCTTAACCCCTGGACTGCATTGGAAACTGTTTAGCTGGAGTGCCGGAGAGGTAAGCGGAATTCCTAGTGTAGCGGTGAAATGCGTAGATAT	Costa	Blautia	80% Study
220296a2070145b2891e65fcc01f2d67	AGCGTAGACGGAGGAGCAAGTCTGGTGTGAAAGGCGGGGGCTTAACCCCTGGACTGCATTGGAAACTGTTTTTCTAGAGTGCCGGAGAGGTAAGCGGAATTCCTAGTGTAGCGGTGAAATGCGTAGATAT	Costa	Blautia	80% Study
d2ec0f7a53a58d539374b1ab6f23aca0	AGCGTAGACGGAGAGGCAAGTCTGATGTGAAAGGCATGGGCTCAACCTGTGGACTGCATTGGAAACTGTTTTTCTAGAGTGCCGGAGAGGCAGGCGGAATTCCTAGTGTAGCGGTGAAATGCGTAGATAT	Costa	Blautia	80% Study
f2879e0398909de7f102b265becd014e	AGCGTAGACGGAGCAGCAAGTCTGATGTGAAAGGCGGGGGCTCAACCCCCGGACTGCATTGGAAACTGCTGATCTTGAGTACCGGAGGGGTAAGCGGAATTCCTAGTGTAGCGGTGAAATGCGTAGATAT	Costa	Blautia	80% Study
a0c79e73186d4ceda991799032ce49dc	AGCGTAGACGGATGGACAAGTCTGATGTGAAAGGCGGGGGCCCAACCCCCGGACTGCATTGGAAACTGCCCGTCTTGAGTGCCGGAGAGGTAAGCGGAATTCCTAGTGTAGCGGTGAAATGCGTAGATAT	Costa	Blautia	80% Study
6f205231cbb0c86de2f642fb9bc9ad39	AGCGTAGACGGATGGACAAGTCTGATGTGAAAGGCAGGGGCCCAACCCCTGGACTGCATTGGAAACTGCCCGTCTTGAGTGCCGGAGAGGTAAGCGGAATTCCTAGTGTAGCGGTGAAATGCGTAGATAT	Costa	Blautia	80% Study
1fb3c483528c4b3ee55cd033e3dedd41	AGCGTAGACGGTGAGGCAAGTCTGATGTGAAAGGCATGGGCTCAACCTGTGGACTGCATTGGAAACTGTCTTACTTGAGTGCCGGAGAGGCAGGCGGAATTCCTAGTGTAGCGGTGAAATGCGTAGATAT	Costa	Blautia	80% Study
4fb150f57edfe32f3c2e3f5685ee981f	AGCGTAGACGGCGAGGCAAGTCTGATGTGAAAGGCAGGGGCTTAACCCCTGGACTGCATTGGAAACTGTCAGGCTAGAGTGCCGGAGAGGTAAGCGGAATTCCTAGTGTAGCGGTGAAATGCGTAGATAT	Costa	Blautia	80% Study
10c26873bcca33cd72b857878fc14417	AGCGTAGACGGATGAGCAAGTCTGATGTGAAAGGCAGGGGCCCAACCCCTGGACTGCATTGGAAACTGTTGATCTTGAGTGCCGGAGAGGTAAGCGGAATTCCTAGTGTAGCGGTGAAATGCGTAGATAT	Costa	Blautia	80% Study
7627b03f58c9cd55b09dfd594b98ae93	CAATGGGGGAAACCCTGATGCAGCGACGCCGCGTGAAGGAAGAAGTATCTCGGTATGTAAACTTCTATCAGCAGGGAAGAAAATGACGGTACCTGACTAAGAAGCCCCGGCTAACTACGTGCCAGCAGCC	Costa	Blautia	80% Study
d5abfc1a5ebfd941a29eb6b4d33fe4a4	AGCGTAGACGGCGAAGCAAGTCTGAAGTGAAAACCCAGGGCTCAACCCTGGGACTGCTTTGGAAACTGTTTTGCTAGAGTGCTGGAGAGGTAAGTGGAATTCCTAGTGTAGCGGTGAAATGCGTAGATAT	Costa	Clostridium	80% Study
82adf22bcc2928ef5e73f544c16dd5ae	GGAGCAGGCGGCAGCAAGGGTCTGTGGTGAAAGGCTGAAGCTTAACTTCAGTGTGCCAGAGAAACCGGGCAGCTAGAGTGCAGGAGAGGATCGTGGAATTCCATGTGTAGCGGTGAAATGCGTAGATATA	Costa	Clostridium	80% Study
54b7794fcace34ca49cc1c876f0d1509	GGAGCAGGCGGCGGCAGAGGTCTGTGGTGAAAGACTGAAGCTTAACTTCAGTAAGCCATAGAAACCGGGCTGCTAGAGTGCAGGAGAGGATCGTGGAATTCCATGTGTAGCGGTGAAATGCGTAGATATA	Costa	Clostridium	80% Study
c294d5cc2cacf38bec57583860a06773	AGCGTAGACGGCGAAGCAAGTCCGAAGTGAAAACCCGGGGCTCAACCTCGGGACTGCTTTGGAAACTGTTTTGCTAGAGTGCTGGAGAGGTAAGTGGAATTCCTAGTGTAGCGGTGAAATGCGTAGATAT	Costa	Clostridium	80% Study
be5c6c554dbb0c0361bec2ae3e8f9495	AGCGTAGGCGGACTTTTAAGTGAGATGTGAAATACCCGGGCTCAACTTGGGTGCTGCATTTCAAACTGGAAGTCTAGAGTGCAGGAGAGGAGAATGGAATTCCTAGTGTAGCGGTGAAATGCGTAGAGAT	Costa	Clostridium	80% Study
dd31b643a75f017cade479dd6173253c	CAATGGGGGGAACCCTGACCGAGCAACGCCGCGTGAAGGAAGAAGGAATTCGTTCTGTAAACTTCTGTTATAAAGGAAGAACGGCACATATAGGGAATGATATGTGAGTGACGGTACTTTATGAGGAAGC	Costa	Clostridium	80% Study
ceb63202771c780aa160df1ceede97e5	TGAGTAGGCGGTTAAGCAAGTCATATGTGAAATTCTGGGGCTCAACCTCAGAGCTGCATAAGAAACTGTTTAACTAGAGTACAGGAGAGGTAAGCGGAATTCCTAGTGTAGCGGTGAAATGCGTAGATAT	Costa	Clostridium	80% Study
5f9e7181420fff699507d8572a80e267	TGAGTAGGCGGTTATGCAAGTCATATGTGAAATTCTGGAGCTCAACTCCAGCGCTGCATAAGAAACTGTGTAACTAGAGTACAGGAGAGGTAAGCGGAATTCCTAGTGTAGCGGTGAAATGCGTAGATAT	Costa	Clostridium	80% Study
581d192498e15b48812efa6284a4ad4b	CGCGTAGGCGGGGTAGTAAGTCAGATGTGAAATCCTATGGCTTAACCATAGAACTGCATTTGAAACTACTACTCTAGAGTATGGGAGAGGTAGGTGGAATTCTTGGTGTAGGGGTAAAATCCGTAGAGAT	Costa	Campylobacter	80% Study
326a440850fcf4ac4558e482e67a340b	CGCGTAGGCGGATTATCAAGTCTCTTGTGAAATCTAATGGCTTAACCATTAAACTGCTTGGGAAACTGATAGTCTAGAGTGAGGGAGAGGCAGATGGAATTGGTGGTGTAGGGGTAAAATCCGTAGATAT	Costa	Campylobacter	80% Study
caf4ef628267f7652b97d17bc4627392	CGTAGGCGGGGTAGTAAGTCAGATGTGAAATCCTATGGCTTAACCATAGAACTGCATTTGAAACTACTACTCTAGAGTATGGGAGAGGTAGGTGGAATTCTTGGTGTAGGGGTAAAATCCGTAGAGATCA	Costa	Campylobacter	80% Study
53930fd5aef0de1573654f556ebf6623	CAATGGGCGAAAGCCTGACGCAGCAACGCCGCGTGGAGGATGACACTTTTCGGAGCGTAAACTCCTTTTCTTAGGGAAGAATTCTGACGGTACCTAAGGAATAAGCACCGGCTAACTCCGTGCCAGCAGC	Costa	Campylobacter	80% Study
0e74b2fe2fcff23bee27f090c084dae9	CAATGGGGGAAACCCTGAAGCAGCAACGCCGCGTGGAGGATGAAGGTTTTCGGATTGTAAACTCCTTTTGTTAGAGAAGATAATGACGGTACCTAACGAATAAGCACCGGCTAACTCCGTGCCAGCAGCC	Costa	Campylobacter	80% Study
1b327a06048867c2ffd574a2f06a764c	TGCGTAGGCGGTTTATTAAGTTAGTGGTTAAATATTTGAGCTAAACTCAATTGTGCCATTAATACTGGTAAACTGGAGTACAGACGAGGTAGGCGGAATAAGTTAAGTAGCGGTGAAATGCATAGATATA	Costa	Odoribacter	80% Study
0aa4bb99aed5c579409a93205721789b	CAATGGCCGGAAGGCTGAACCAGCCAAGTCGCGTGAGGGAAGACTGCCCTATGGGTTGTAAACCTCTTTTGCAAGGGAAGAATAAGGGTTACGTGTAGCCCGATGCCAGTACTTTGCGAATAAGCATCGG	Costa	Odoribacter	80% Study
35ce2f1334675edb50e6d8062965c595	CAATGGCCGGAAGGCTGAACCAGCCAAGTCGCGTGAGGGAAGACTGCCCTATGGGTTGTAAACCTCTTTTGCAAGGGAAGAATAAGGGCTACGTGTAGCCCGATGCCAGTACTTTGCGAATAAGCATCGG	Costa	Odoribacter	80% Study
e5eea7c36e196cb1e32e7590ca104082	CAATGGCCGGAAGGCTGAACCAGCCAAGTCGCGTGAGGGAAGACTGCCCTATGGGTTGTAAACCTCTTTTGCAAGGGAAGAATAAGGGCTACGCGTAGCCCGATGCCAGTACTTTGCGAATAAGCATCGG	Costa	Odoribacter	80% Study
fa72ef13aa677b1e110b660eab664291	TGCGTAGGCGGTTTATTAAGTTAGTGGTTAAACGGTTGAGCTAAACTCAATTTTGCCATTAATACTGGTAAACTCGAGTACAGACGAGGTAGGCGGAATAAGTTAAGTAGCGGTGAAATGCATAGATATA	Costa	Odoribacter	80% Study
c63b04a29eebb73a4ab32b732caa920e	CGCGTAGGCGGGACGCCAAGTCAGCGGTAAAAGACTGCAGCTAAACTGTAGCACGCCGTTGAAACTGGCGCCCTCGAGACGAGACGAGGGAGGCGGAACAAGTGAAGTAGCGGTGAAATGCTTAGATATC	Costa	Odoribacter	80% Study
b0cbd1b71590bd73eb2cb4f1ae98f150	CGCGTAGGCGGGACGCCAAGTCAGCGGTAAAAGACTGCAGCTAAACTGTAGCACGCCGTTGAAACTGGCGACCTGGAGACGAGACGAGGGAGGCGGAACAAGTGAAGTAGCGGTGAAATGCTTAGATATC	Costa	Odoribacter	80% Study
f96533369e0f0494fd942ef7ec91e632	CACGTAGGCGGCTTGGTAAGTCAGGGGTGAAATCCCACAGCCCAACTGTGGAACTGCCTTTGATACTGCCAGGCTTGAGTACCGGAGAGGGTGGCGGAATTCCAGGTGTAGGAGTGAAATCCGTAGATAT	Costa	Bilophila	80% Study
537b743f66c9da15180ebc326f3039ed	CACGTAGGCGGCCCGGTAAGTCAGGGGTGAAATCCCACAGCCCAACTGTGGAACTGCCCTTGATACTGCCGGGCTTGAGTACCGGAGAGGGTGGCGGAATTCCAGGTGTAGGAGTGAAATCCGTAGATAT	Costa	Bilophila	80% Study
728c7bb79baa87e35a9b93d68f9c8a8a	AGTGGGGAATATTGGGCAATGGGCGCAAGCCTGACCCAGCAACGCCGCGTGAAGGAAGAAGGCCCTCGGGTTGTAAACTTCTTTTGTCAGGGACGAAGCAAGTGACGGTACCTGACGAATAAGCCACGGC	Mancabelli	Oscillospira	80% Study
24335f309d02be1e15658315fc80972e	AGTGGGGAATATTGGGCAATGGACGCAAGTCTGACCCAGCAACGCCGCGTGAAGGAAGAAGGCTTTCGGGTTGTAAACTTCTTTTGTCAGGGAAGAGTAGAAGACGGTACCTGACGAATAAGCCACGGCT	Mancabelli	Oscillospira	80% Study
fce17b06cfd19755370f203ae8253b7c	AGTGGGGAATATTGGGCAATGGGCGCAAGCCTGACCCAGCAACGCCGCGTGAAGGATGAAGGCTTTCGGGTTGTAAACTTCTTTTATCAGGGACGAAGAAAATGACGGTACCTGATGAATAAGCCACGGC	Mancabelli	Oscillospira	80% Study
e015a4fbe58761aec7fe0fe24ebdbb47	AGTGGGGAATATTGGGCAATGGGCGAAAGCCTGACCCAGCAACGCCGCGTGAAGGAAGAAGGCTTTCGGGTTGTAAACTTCTTTTATCAGGGACGAAGGATGTGACGGTACCTGATGAATAAGCCACGGC	Mancabelli	Oscillospira	80% Study
5bbab7ca3bb4ee7a5ec30480ba5ab89a	AGTGGGGAATATTGGGCAATGGGCGCAAGCCTGACCCAGCAACGCCGCGTGAAGGAAGAAGGCTTTCGGGTTGTAAACTTCTTTTGTCAGGGACGAACAAATGACGGTACCTGACGAATAAGCCACGGCT	Mancabelli	Oscillospira	80% Study
6c31ab61f77d843aec28b44b72c282ec	AGTGGGGAATATTGGGCAATGGGCGCAAGCCTGACCCAGCAACGCCGCGTGAAGGATGAAGGCCCTCGGGTTGTAAACTTCTTTTAACAGGGACGAATTCTGACGGTACCTGTTGAATAAGCCACGGCTA	Mancabelli	Oscillospira	80% Study
ce65af5edc95c036f15584a2d74c9e54	AGTGGGGAATATTGGGCAATGGACGCAAGTCTGACCCAGCAACGCCGCGTGAAGGAAGAAGGCTTTCGGGTTGTAAACTTCTTTTGTCAGGGAACAGTAGAAGAGGGTACCTGACGAATAAGCCACGGCT	Mancabelli	Oscillospira	80% Study
7c94151a0827daccee5209e730789690	AGTGGGGAATATTGGGCAATGGGCGCAAGCCTGACCCAGCAACGCCGCGTGAAGGAAGAAGGCTTTCGGGTTGTAAACTTCTTTTCTCAGGGACGAAGGACGTGACGGTACCTGAGGAATAAGCTCCGGC	Mancabelli	Oscillospira	80% Study
867e67b54679954e00147d2e9786240d	AGGGGGGGAATATTGGGCAATGGGCGCAAGCCTGACCCAGCAACGCCGCGTGAAGGAAGAAGGCCCTCGGGTTGTAAACTTCTTTTGTCAGGGACGAAGCAAGTGACGGTACCTGACGAATAAGCCACGG	Mancabelli	Oscillospira	80% Study
9e68e43512fbf0048cdf01d48a4de3f5	AGTGGGGAATATTGGGCAATGGGCGCAAGCCTGACCCAGCAACGCCGCGTGAAGGAAGAAGGCTTTCGGGTTGTAAACTTCTTTTGTCAGGGAACAGTAGAAGAGGGTACCTGACGAATAAGCTCCGGCT	Mancabelli	Oscillospira	80% Study
8a53cfef99cf451994a5f7806bb82023	AGTGGGGAATATTGGGCAATGGGGGCAACCCTGACCCAGCAACGCCGCGTGAAGGAAGAAGGCTTTCGGGTTGTAAACTTCTTTTACCAGGGACGAAGACGTGACGGTACCTGGAGAAAAAGCCACGGCT	Mancabelli	Oscillospira	80% Study
3ff33a09ec4d7d6e4040d5b45a0e1058	AGTGGGGAATATTGGGCAATGGGCGCAAGCCTGACCCAGCAACGCCGCGTGAAGGAAGAAGGCTCTCGGGTTGTAAACTTCTTTTATCAGGGACGAAGCAAGTGACGGTACCTGATGAATAAGCCACGGC	Mancabelli	Oscillospira	80% Study
cf5b9363e00a34e8c03728962bbecf34	AGGGGGGAATATTGGGCAATGGGCGCAAGCCTGACCCAGCAACGCCGCGTGAAGGAAGAAGGCCCTCGGGTTGTAAACTTCTTTTGTCAGGGACGAAGCAAGTGACGGTACCTGACGAATAAGCCACGGC	Mancabelli	Oscillospira	80% Study
a140e71098a737afd54aae82ce1ab6c5	AGTGGGGAATATTGGGCAATGGGCGCAAGCCTGACCCAGCAATGCCGCGTGAAGGAAGAAGGCTTTCGGGTTGTAAACTTCTTTTGTCAGGGAAGAGAAGAAGACGGTACCTGACGAATAAGCCACGGCT	Mancabelli	Oscillospira	80% Study
a932d7a480058732776d9e10e247a333	AGTGGGGAATATTGGGCAATGGGGGCAACCCTGACCCAGCAACGCCGCGTGAAGGAAGAAGGCTTTCGGGTTGTAAACTTCTTTTACCAGGGACGAAGGACGTGACGGTACCTGGAGAAAAAGCCACGGC	Mancabelli	Oscillospira	80% Study
01c1d4e885b4f0f82ced66f6e45dba33	AGTGGGGAATATTGGGCAATGGGCGCAAGCCTGACCCAGCAACGCCGCGTGAAGGAAGAAGGCCCTCGGGTTGTAAACTTCTTTTATCAGGGACGAAGCAAGTGACGGTACCTGATGAATAAGCCACGGC	Mancabelli	Oscillospira	80% Study
bc2c9aa4bc014e31290717d68057d785	AGTGGGGAATATTGGGCAATGGGCGCAAGCCTGACCCAGCAACGCCGCGTGAAGGAAGAAGGCTTTCGGGTTGTAAACTTCTTTTGTCAGGGACGAAGGACGTGACGGTACCTGACGAATAAGCCACGGC	Mancabelli	Oscillospira	80% Study
b278714561608b3bff21149d9f332960	AGTGGGGAATATTGGGCAATGGGCGCAAGCCTGACCCAGCAACGCCGCGTGAAGGAAGAAGGCTCTCGGGTTGTAAACTTCTTTTAAGAGGGACGAAACAAATGACGGTACCTCTTGAATAAGCCACGGC	Mancabelli	Oscillospira	80% Study
965dd4ad0ff5c79acf06aa4895b45eb8	AGTGGGGAATATTGGGCAATGGGCGCAAGCCTGACCCAGCAACGCCGCGTGAAGGAAGAAGGCTTTCGGGTTGTAAACTTCTTTTGTCAGGGAACAGTAGAAGAGGGTACCTGACGAATAAGCCACGGCT	Mancabelli	Oscillospira	80% Study
3ce552451e21bf01225827402bf69d43	AGTGGGGAATATTGGGCAATGGGCGCAAGCCTGACCCAGCAACGCCGCGTGAAGGAAGAAGGCTTTCGGGTTGTAAACTTCTTTTATCAGGGACGAAATAAATGACGGTACCTGATGAATAAGCCACGGC	Mancabelli	Oscillospira	80% Study
5c91ed753c18282861fdc36c33796ab0	AGTGGGGAATATTGGGCAATGGGCGCAAGCCTGACCCAGCAACGCCGCGTGAAGGATGAAGGCTTTCGGGTTGTAAACTTCTTTTATCAGGGACGAATTCTGACGGTACCTGATGAATAAGCCACGGCTA	Mancabelli	Oscillospira	80% Study
54d1c8705058f07882872f82feb1b2da	AGTGGGGAATATTGGGCAATGGGCGCAAGCCTGACCCAGCAACGCCGCGTGAAGGAAGAAGGCCCTCGGGTTGTAAACTTCTTTTGACAGGGACGAAGAAAATGACGGTACCTGTCGAATAAGCCACGGC	Mancabelli	Oscillospira	80% Study
2b48750a7440371a9a0e393a221c317a	AGTGGGGAATATTGGGCAATGGGCGCAAGCCTGACCCAGCAACGCCGCGTGAAGGAAGAAGGCTTTCGGGTTGTAAACTTCTTTTGTCAGGGACGAAACAAATGACGGTACCTGACGAATAAGCCACGGC	Mancabelli	Oscillospira	80% Study
1ae79cff8ee44a218aae9a10d68cb81c	AGTGGGGAATATTGGGCAATGGGCGCAAGCCTGACCCAGCAACGCCGCGTGAAGGAAGAAGGCTCTCGGGTTGTAAACTTCTTTTAAGAGGGACGAACACAATGACGGTACCTCTTGAATAAGCCACGGC	Mancabelli	Oscillospira	80% Study
6c69183b3f3482bad2a55e8474ecf8c1	AGTGGGGAATATTGGGCAATGGGCGCAAGCCTGACCCAGCAACGCCGCGTGAAGGAAGAAGGCTTTCGGGTTGTAAACTTCTTTTGTCAGGGACGAAGCAAGTGACGGTACCTGACGAATAAGCTCCGGC	Mancabelli	Oscillospira	80% Study
4dd21861f0d122b36300d7d6bfda3018	AGTGGGGAATATTGGGCAATGGGCGCAAGCCTGACCCAGCAACGCCGCGTGAAGGAAGAAGGCTTTCGGGTTGTAAACTTCTTTTGTCAGGGACGAAGACGTGACGGTACCTGACGAATAAGCTCCGGCT	Mancabelli	Oscillospira	80% Study
ddf1f8e0fdef60ae40952e5bf59d4c1e	AGTGGGGAATATTGGGCAATGGGCGCAAGCCTGACCCAGCAACGCCGCGTGAAGGAAGAAGGCTTTCGGGTTGTAAACTTCTTTTGTTAGGGACGAACAAATGACGGTACCTGACGAATAAGCCACGGCT	Mancabelli	Oscillospira	80% Study
26294e2020da04ec9f6e92c77584df67	AGGGGGGGAATATTGGGCAATGGGCGCAAGCCTGACCCAGCAACGCCGCGTGAAGGAAGAAGGCTTTCGGGTTGTAAACTTCTTTTGTCAGGGAACAGTAGAAGAGGGTACCTGACGAATAAGCCACGGC	Mancabelli	Oscillospira	80% Study
134e539fff95cc795846e058aad20080	AGGGGGGGAATATTGGGCAATGGGCGCAAGCCTGACCCAGCAACGCCGCGTGAAGGAAGAAGGCTCTCGGGTTGTAAACTTCTTTTAAGAGGGACGAAACAAATGACGGTACCTCTTGAATAAGCCACGG	Mancabelli	Oscillospira	80% Study
d9ca0906ed0453ce2c1a3ea9515d41d5	AGGGGGGGAATATTGGGCAATGGGCGCAAGCCTGACCCAGCAACGCCGCGTGAAGGAAGAAGGCCCTCGGGTTGTAAACTTCTTTTGACAGGGACGAAGAAAATGACGGTACCTGTCGAATAAGCCACGG	Mancabelli	Oscillospira	80% Study
6b54b3045f4dacb73b1326f125cd6cf6	AGTGGGGAATATTGGGCAATGGGCGCAAGCCTGACCCAGCAACGCCGCGTGAAGGAAGAAGGCTTTCGGGTTGTAAACTTCTTTTATCAGGGAAGATGGATGAGACTGTACCTGATGAATAAGCCACGGC	Mancabelli	Oscillospira	80% Study
47fae025ba909c25b2620fc690bbe6c3	AGTGGGGAATATTGGGCAATGGACGCAAGTCTGACCCAGCAACGCCGCGTGAAGGAAGAAGGCTTTCGGGTTGTAAACTTCTTTTGTCAGGGAAGAGCAGAAGACGGTACCTGACGAATAAGCCACGGCT	Mancabelli	Oscillospira	80% Study
4c53f9fc7c6832fe48e6c0d0f187f962	AGGGGGGGAATATTGGGCAATGGGCGCAAGCCTGACCCAGCAACGCCGCGTGAAGGAAGAAGGCCCTCGGGTTGTAAACTTCTTTTGACAGGGACGAAGAAAAATGACGGTACCTGTCGAATAAGCCACG	Mancabelli	Oscillospira	80% Study
5a6d704fd8bcbac8dc3586c38f6bb710	AGTGGGGAATATTGGGCAATGGGCGCAAGCCTGACCCAGCAACGCCGCGTGAAGGAAGAAGGCCCTCGGGTTGTAAACTTCTTTTGACAGGGACGAAGAAAATGACGGTAACCTGTCGAATAAGCCACGG	Mancabelli	Oscillospira	80% Study
7a65e1e3faad61f64df8ad58048c5975	AGTGGGGAATATTGGGCAATGGGCGCAAGCCTGACCCAGCAACGCCGCGTGAAGGAAGAAGGCCCTCGGGTTGTAAACTTCTTTTGTCAGGGACGAACAGATGACGGTACCTGACGAATAAGCTCCGGCT	Mancabelli	Oscillospira	80% Study
a1db95599711063e70c1c8c52b9a3ddd	AGTGGGGAATATTGGGCAATGGACGCAAGTCTGACCCAGCAACGCCGCGTGAAGGAAGAAGGCTTTCGGGTTGTAAACTTCTTTTAAGAGGGAACAGGAGAAGAGGGTACCTCTTGAATAAGCCACGGCT	Mancabelli	Oscillospira	80% Study
bc72cac2160d6272d6827328ca6b0f84	AGTGGGGAATATTGGGCAATGGGCGCAAGCCTGACCCAGCAACGCCGCGTGAAGGAAGAAGGCTTTCGGGTTGTAAACTTCTTTTGTCAGGGAACAGTAGAAGAGGGTACCTGACGAATAAGCACGGCTA	Mancabelli	Oscillospira	80% Study
ee767a93e9135d1707b8d5231038ae33	AGTGGGGAATATTGGGCAATGGGCGCAAGCCTGACCCAGCAATGCCGCGTGAAGGAAGAAGGCTTTCGGGTTGTAAACTTCTTTGACGAGGGAAGAGTAGAAGACGGTACCTCGAAAACAAGCCACGGCT	Mancabelli	Oscillospira	80% Study
1ee76509596c829336a7e918ab444b23	AGTGGGGAATATTGGGCAATGGGCGCAAGCCTGACCCAGCAACGCCGCGTGAAGGAAGAAGGCTTTCGGGTTGTAAACTTCTTTTATTAAGGACGAAGCAATGACGGTACTTAATGAATAAGCTCCGGCT	Mancabelli	Oscillospira	80% Study
c8659ffaf66d9aace0c9736a989a3f36	AGTGGGGAATATTGGGCAATGGGCGCAAGCCTGACCCAGCAACGCCGCGTGAAGGAAGAAGGCTTTCGGGTTGTAAACTTCTTTTATTGGGGACGAACGCAATGACGGTACCCATTGAATAAGCTCCGGC	Mancabelli	Oscillospira	80% Study
57be565b5b1d4e1a883de6e68c0bad9d	AGTGGGGAATATTGGGCAATGGGCGCAAGCCTGACCCAGCAACGCCGCGTGAAGGAAGAAGGCTTTCGGGTTGTAAACTTCTTTTATTAAGGACGAAACAAATGACGGTACTTAATGAATAAGCTCCGGC	Mancabelli	Oscillospira	80% Study
5771a1c235a56d3e4643858a0d35a97d	AGTGGGGAATATTGGGCAATGGGCGCAAGCCTGACCCAGCAACGCCGCGTGAAGGAAGAAGGCCCTCGGGTTGTAAACTTCTTTTGTCAGGGACGAAGAGATGACGGTACCTGACGAATAAGCTCCGGCT	Mancabelli	Oscillospira	80% Study
822f3a6ebadf015aeba51935dd31d773	AGTGGGGAATATTGGGCAATGGGCGCAAGCCTGACCCAGCAACGCCGCGTGAAGGATGAAGGCTTTCGGGTTGTAAACTTCTTTTATCAGGGACGAAATAAATGACGGTACCTGATGAATAAGCCACGGC	Mancabelli	Oscillospira	80% Study
d207680615255465d987802e52a66184	AGTGGGGAATATTGGGCAATGGGCGCAAGCCTGACCCAGCAACGCCGCGTGAAGGAAGAAGGCTTTCGGGTTGTAAACTTCTTTTATTAAGGACGAAAGAAATGACGGTACTTAATGAATAAGCTCCGGC	Mancabelli	Oscillospira	80% Study
36519877369f6526bb8e65bcd82c9cdb	GTGGGGAATATTGGGCAATGGGCGCAAGCCTGACCCAGCAACGCCGCGTGAAGGAAGAAGGCCCTCGGGTTGTAAACTTCTTTTGTCAGGGACGAAGCAAGTGACGGTACCTGACGAATAAGCCACGGCT	Mancabelli	Oscillospira	80% Study
8db4fe2520e17fb52d9ba976bc620312	AGTGGGGAATATTGGGCAATGGGCGCAAGCCTGACCCAGCAACGCCGCGTGAAGGATGAAGGCTTTCGGGTTGTAAACTTCTTTTATCAGGGACGAACAAAATGACGGTACCTGATGAATAAGCCACGGC	Mancabelli	Oscillospira	80% Study
57472862df2c0f7bf853c91f252cfd76	AGTGGGGAATATTGGGCAATGGGCGCAAGCCTGACCCAGCAATGCCGCGTGAAGGAAGAAGGCTTTCGGGTTGTAAACTTCTTTTGTCAGGGAAGAGTAGAAGACGGTACCTGACGAATAAGCCACGGCT	Mancabelli	Oscillospira	80% Study
11a7905f5ec84232ef43c21436a854f4	AGTGGGGAATATTGGGCAATGGGCGCAAGCCTGACCCAGCAACGCCGCGTGAAGGAAGAAGGCTTTCGGGTTGTAAACTTCTTTTATCAGGGAAGATGAATGAGACTGTACCTGATGAATAAGCCACGGC	Mancabelli	Oscillospira	80% Study
14919c112daa9ac2fdf45470836d3c4b	AGTGGGGAATATTGGGCAATGGGCGCAAGCCTGACCCAGCAATGCCGCGTGAAGGAAGAAGGCTTTCGGGTTGTAAACTTCTTTTGTCAGGGAAGAGCAGAAGACGGTACCTGACGAATAAGCTCCGGCT	Mancabelli	Oscillospira	80% Study
db7a68a77de6c4bb0269fc4ba3073960	AGTGGGGAATATTGGGCAATGGGCGCAAGCCTGACCCAGCAACGCCGCGTGAAGGATGAAGGCTTTCGGGTTGTAAACTTCTTTTATCAGGGACGAAAAAATGACGGTACCTGATGAATAAGCCACGGCT	Mancabelli	Oscillospira	80% Study
7d502022502fddab3775097f2d7c079d	AGTGGGGAATATTGGGCAATGGGGGCAACCCTGACCCAGCAACGCCGCGTGAAGGAAGAAGGCTTTCGGGTTGTAAACTTCTTTGACAAGGGACGAAGAAAGTGACGGTACCTTGAAAACAAGCCACGGC	Mancabelli	Oscillospira	80% Study
019e51b2e7d771513ced3e0fedf9e03f	AGTGGGGAATATTGGGCAATGGGCGCAAGCCTGACCCAGCAACGCCGCGTGAAGGATGAAGGCTTTCGGGTTGTAAACTTCTTTTATTCGGGACGAAGAAAATGACGGTACCGAATGAATAAGCCACGGC	Mancabelli	Oscillospira	80% Study
48450075ceed9b8c86a706598c9fcbf0	AGTGGGGAATATTGGGCAATGGGCGCAAGCCTGACCCAGCAACGCCGCGTGAAGGAAGAAGGCTTTCGGGTTGTAAACTTCTTTTGTCAGGGAAGAGCAGAAGACTGTACCTGACGAATAAGCTCCGGCT	Mancabelli	Oscillospira	80% Study
ef4f3140bf072191b21c59922c2dbc3c	AGTGGGGAATATTGGGCAATGGACGCAAGTCTGACCCAGCAACGCCGCGTGAAGGAAGAAGGCTTTCGGGTTGTAAACTTCTTTTAAGGGGGAAGAGCAGAAGACGGTACCCCTTGAATAAGCCACGGCT	Mancabelli	Oscillospira	80% Study
e3f37049601d4caacf4c19cffbd67bac	AGTGGGGAATATTGGGCAATGGGCGCAAGCCTGACCCAGCAACGCCGCGTGAAGGAAGAAGGCTTTCGGGTTGTAAACTTCTTTTCTCAGGGACGAAGAAAGTGACGGTACCTGAGGAATAAGCCACGGC	Mancabelli	Oscillospira	80% Study
22f079b9a37051cf4047ef7109a30d70	AGTGGGGAATATTGGGCAATGGGCGCAAGCCTGACCCAGCAACGCCGCGTGAAGGAAGAAGGCTTTCGGGTTGTAAACTTCTTTTGTCAGGGACGAAGCAAGTGACGGTACCTGACGAATAAGCCACGGC	Mancabelli	Oscillospira	80% Study
b4f950d2cd145ad4ba6bdddeacadf696	AGTGGGGAATATTGGGCAATGGGCGCAAGCCTGACCCAGCAACGCCGCGTGAAGGATGAAGGCTTTCGGGTTGTAAACTTCTTTTATTCGGGACGAAACAAATGACGGTACCGAATGAATAAGCCACGGC	Mancabelli	Oscillospira	80% Study
a01cf0ff9100c764e043715e3b130342	AGTGGGGAATATTGGGCAATGGGCGCAAGCCTGACCCAGCAACGCCGCGTGAAGGAAGAAGGCTTTCGGGTTGTAAACTTCTTTTCTCAGGGACGAAGCAAGTGACGGTACCTGAGGAATAAGCCACGGC	Mancabelli	Oscillospira	80% Study
82d1a10e708275ada028db58a9a6f28f	AGGGGGGAATATTGGGCAATGGGCGCAAGCCTGACCCAGCAACGCCGCGTGAAGGAAGAAGGCTTTCGGGTTGTAAACTTCTTTTAAGGGGGAAGAGCAGAAGACGGTACCCCTTGAATAAGCCACGGCT	Mancabelli	Oscillospira	80% Study
af74cf3056d7f5070d3e8839eb206dff	AGTGGGGAATATTGGGCAATGGGCGCAAGCCTGACCCAGCAACGCCGCGTGAAGGAAGAAGGCTTTCGGGTTGTAAACTTCTTTTAAGAGGGAAGAGCAGAAGACGGTACCTCTTGAATAAGCCACGGCT	Mancabelli	Oscillospira	80% Study
338454faa263e39db6d6ac250bef74c5	AGTGGGGAATATTGGGCAATGGGCGCAAGCCTGACCCAGCAATGCCGCGTGAAGGAAGAAGGCTTTCGGGTTGTAAACTTCTTTTAAGAGGGAAGAGCAGAAGACGGTACCTCTTGAATAAGCCACGGCT	Mancabelli	Oscillospira	80% Study
6df523f8c674d4612bd00fde28d5d44e	AGTGGGGAATATTGGGCAATGGGCGCAAGCCTGACCCAGCAACGCCGCGTGAAGGAAGAAGGCTTTCGGGTTGTAAACTTCTTTTGACAGGGAAGAGCAGAAGACGGTACCTGTCGAATAAGCCACGGCT	Mancabelli	Oscillospira	80% Study
b0ff8ca4dc2f654d57a1b3a2d9f79fc0	AGTGGGGAATATTGGGCAATGGGCGCAAGCCTGACCCAGCAACGCCGCGTGAAGGAAGAAGGCTTTCGGGTTGTAAACTTCTTTTGTCAGGGACGAGTAGAAGACGGTACCTGACGAATAAGCCACGGCT	Mancabelli	Oscillospira	80% Study
df6f53e1765db5cdff7cc3b488bf94f9	AGTGGGGAATATTGGGCAATGGGCGCAAGCCTGACCCAGCAACGCCGCGTGAAGGAAGAAGGCTTTCGGGTTGTAAACTTCTTTTAAGAGGGAAGAGCAGAAGACGGTACCTCTTGAATAAGCTCCGGCT	Mancabelli	Oscillospira	80% Study
a2423472442af49ff0ddbfe1acf40a9f	AGTGGGGAATATTGGGCAATGGGCGCAAGCCTGACCCAGCAACGCCGCGTGAAGGAAGAAGGCTTTCGGGTTGTAAACTTCTTTTCTGAGGGACGAAGAAAGTGACGGTACCTCAGGAATAAGCCACGGC	Mancabelli	Oscillospira	80% Study
1cc3354778692956f6ad93d930e05405	AGTGGGGAATATTGGGCAATGGGCGCAAGCCTGACCCAGCAACGCCGCGTGAAGGAAGAAGGCCTTCGGGTTGTAAACTTCTTTTCTTAGGGACGAAGAAAGTGACGGTACCTAAGGAATAAGCCACGGC	Mancabelli	Oscillospira	80% Study
b77e15afc7d6014a4930e9a8ddb2b6a5	AGTGGGGAATATTGGGCAATGGGCGCAAGCCTGACCCAGCAACGCCGCGTGAAGGAAGAAGGCTTTCGGGTTGTAAACTTCTTTTCTTAGGGACGAAGCAAGTGACGGTACCTAAGGAATAAGCCACGGC	Mancabelli	Oscillospira	80% Study
3d6a15ad19a194c293668287ec980e43	AGTGGGGAATATTGGGCAATGGGCGCAAGCCTGACCCAGCAACGCCGCGTGAAGGATGAAGGCTTTCGGGTTGTAAACTTCTTTTATCAGGGACGAAACAAATGACGGTACCTGATGAATAAGCCACGGC	Mancabelli	Oscillospira	80% Study
a504a67b8616f81fb70faeb868c2b441	AGTGGGGAATATTGGGCAATGGGCGAAAGCCTGACCCAGCAACGCCGCGTGAAGGAAGAAGGCCTTCGGGTTGTAAACTTCTTTTAAGAGGGACGAAGAAGTGACGGTACCTCTTGAATAAGCCACGGCT	Mancabelli	Oscillospira	80% Study
50acb479e3e70fc2ce5f7eb75607fb8c	AGGGGGGAATATTGGGCAATGGGCGCAAGCCTGACCCAGCAACGCCGCGTGAAGGAAGAAGGCCCTCGGGTTGTAAACTTCTTTTATTCGGGACGAAACAAATGACGGTACCGAATGAATAAGCCACGGC	Mancabelli	Oscillospira	80% Study
7f33ae6690d8145b828b4353e8b011c8	AGTGGGGAATATTGGGCAATGGGCGCAAGCCTGACCCAGCAACGCCGCGTGAAGGATGAAGGCTTTCGGGTTGTAAACTTCTTTTGTCAGGGACGAAACAAATGACGGTACCTGACGAATAAGCCACGGC	Mancabelli	Oscillospira	80% Study
9d145ccf8614e27058515b5f33c906c3	AGTGGGGAATATTGGGCAATGGGCGCAAGCCTGACCCAGCAACGCCGCGTGAAGGAAGAAGGCTTTCGGGTTGTAAACTTCTTTTAAGAGGGAAGAGTAGAAGACGGTACCTCTTGAATAAGCCACGGCT	Mancabelli	Oscillospira	80% Study
1af1096338fec201348e23110fb84409	AGTGGGGAATATTGGGCAATGGGCGCAAGCCTGACCCAGCAACGCCGCGTGAAGGATGAAGGCCCTCGGGTTGTAAACTTCTTTTATTCAGGACGAACAAAATGACGGTACTGAATGAATAAGCCACGGC	Mancabelli	Oscillospira	80% Study
665800969116563c3c336a1e72b2602a	AGTGGGGAATATTGGGCAATGGGCGCAAGCCTGACCCAGCAACGCCGCGTGAAGGAAGAAGGCTTTCGGGTTGTAAACTTCTTTTATTGGGGACGAATCGATGACGGTACCCATTGAATAAGCTCCGGCT	Mancabelli	Oscillospira	80% Study
7017018a8947a1226b34664e3e18bffe	AGGGGGGAATATTGGGCAATGGGCGCAAGCCTGACCCAGCAACGCCGCGTGAAGGAAGAAGGCTTTCGGGTTGTAAACTTCTTTTCTGGGGGACGAACAAATGACGGTACCCCAGGAATAAGCCACGGCT	Mancabelli	Oscillospira	80% Study
32fae52881d7d11ab52ee6821963d416	AGTGGGGAATATTGGGCAATGGGCGCAAGCCTGACCCAGCAACGCCGCGTGAAGGATGAAGGTTTTCGGATTGTAAACTTCTTTTGTGGGGGACGAAACAAATGACGGTACCCCAAGAATAAGCCACGGC	Mancabelli	Oscillospira	80% Study
6af4faf8c1e611c46c8fe9aa2bcbe944	AGTGGGGAATATTGGGCAATGGGCGCAAGCCTGACCCAGCAACGCCGCGTGAAGGAAGAAGGCTTTCGGGTTGTAAACTTCTTTTGTCGGGGACGAAACAAATGACGGTACCCGACGAATAAGCCACGGC	Mancabelli	Oscillospira	80% Study
6732d36c10c94bd9a479f013e32f99a1	AGGGGGGAATATTGGGCAATGGGCGCAAGCCTGACCCAGCAACGCCGCGTGAAGGAAGAAGGCTTTCGGGTTGTAAACTTCTTTTAAGAGGGAAGAGCAGAAGACGGTACCTCTTGAATAAGCCACGGCT	Mancabelli	Oscillospira	80% Study
683ef6249bd51106483539b7587f2f8a	AGGGGGGAATATTGGGCAATGGGCGCAAGCCTGACCCAGCAACGCCGCGTGAAGGAAGAAGGCTTTCGGGTTGTAAACTTCTTTTAAGAGGGAAGAGTAGAAGACGGTACCTCTTGAATAAGCCACGGCT	Mancabelli	Oscillospira	80% Study
aa05d4a4f0e1e6f798d62a285287d26a	AGGGGGGAATATTGGGCAATGGGCGCAAGCCTGACCCAGCAACGCCGCGTGAAGGAAGAAGGCTTTCGGGTTGTAAACTTCTTTTAAGGGGGACGAACAAATGACGGTACCCCTTGAATAAGCCACGGCT	Mancabelli	Oscillospira	80% Study
6ba59078c79592232136cbc71b2d2ee6	AGTGGGGAATATTGGGCAATGGGCGCAAGCCTGACCCAGCAACGCCGCGTGAAGGAAGAAGGCTTTCGGGTTGTAAACTTCTTTTGACAGGGAAGAGTAGAAGACGGTACCTGTCGAATAAGCCACGGCT	Mancabelli	Oscillospira	80% Study
d3c39eece97da3d286063141b7bc5c8e	AGTGGGGAATATTGGGCAATGGGCGCAAGCCTGACCCAGCAACGCCGCGTGAAGGAAGAAGGCTTTCGGGTTGTAAACTTCTTTTGTCGGGGACGAGTAGAAGACGGTACCTGGCGAATAAGCCACGGCT	Mancabelli	Oscillospira	80% Study
2cb9848baea86babb7dbba488739c1bb	AGGGGGGAATATTGGGCAATGGACGCAAGTCTGACCCAGCAACGCCGCGTGAAGGAAGAAGGCTTTCGGGTTGTAAACTTCTTTTAAGGGGGAAGAGCAGAAGACGGTACCCCTTGAATAAGCCACGGCT	Mancabelli	Oscillospira	80% Study
09603db3cbb6df70b3f11d59793b7b8b	CCTACGGGGCGCAGCAGTGGGGAATATTGGGCAATGGGCGCAAGCCTGACCCAGCAACGCCGCGTGAAGGAAGAAGGCTCTCGGGTTGTAAACTTCTTTTAAGAGGGACGAAACAAATGACGGTACCTCT	Mancabelli	Oscillospira	80% Study
08bc163d763d9769dbdfe4fec89dbfa7	CCTACGGGGCGCAGCAGTGGGGAATATTGGGCAATGGGCGCAAGCCTGACCCAGCAACGCCGCGTGAAGGAAGAAGGCTTTCGGGTTGTAAACTTCTTTTGTCAGGGACGAACAAATGACGGTACCTGAC	Mancabelli	Oscillospira	80% Study
c22f9eba27b2b32f1412afb3d58484b0	CCTACGGGGCGCAGCAGTGGGGAATATTGGGCAATGGGCGCAAGCCTGACCCAGCAACGCCGCGTGAAGGAAGAAGGCTTTCGGGTTGTAAACTTCTTTTGTCAGGGAACAGTAGAAGAGGGTACCTGAC	Mancabelli	Oscillospira	80% Study
1a9feb2424993d51913c867c527403a0	AGTGGGGAATATTGGGCAATGGGCGCAAGCCTGACCCAGCAACGCCGCGTGAAGGATGAAGGCCCTCGGGTTGTAAACTTCTTTTAACAGGGACGAATAAAGTGACGGTACCTGTTGAATAAGCCACGGC	Mancabelli	Oscillospira	80% Study
14924c5d7c9a5f6bf34b03232ed2c1f7	AGTGGGGAATATTGGGCAATGGGCGAAAGCCTGACCCAGCAACGCCGCGTGAAGGAAGAAGGCTTTCGGGTTGTAAACTTCTTTTATCAGGGACGAAGTGAGTGACGGTACCTGATGAATAAGCTCCGGC	Mancabelli	Oscillospira	80% Study
ef4c77ec23b479d038f6c49c0cc43a4f	AGTGGGGAATATTGGGCAATGGGCGCAAGCCTGACCCAGCAACGCCGCGTGAAGGAAGAAGGCTTTCGGGTTGTAAACTTCTTTTGTCAGGGACGAATAAATGACGGTACCTGACGAATAAGCCACGGCT	Mancabelli	Oscillospira	80% Study
84217420343790787c606b40e28d58cc	AGTGGGGAATATTGGGCAATGGGCGCAAGCCTGACCCAGCAACGCCGCGTGAAGGAAGAAGGCTTTCGGGTTGTAAACTTCTTTTGTTAGGGACGAACAAATGACGGTACCTAACGAATAAGCCACGGCT	Mancabelli	Oscillospira	80% Study
a8479067680a84f96a1b4c85e58d136b	AGTGGGGAATATTGGGCAATGGGCGCAAGCCTGACCCAGCAACGCCGCGTGAAGGAAGAAGGCTTTCGGGTTGTAAACTTCTTTTATCAGGGACGAAGGAATGACGGTACCTGATGAATAAGCCACGGCT	Mancabelli	Oscillospira	80% Study
bb3cf45f1853a7d170eecd11a5c99088	AGTGGGGAATATTGGGCAATGGGCGCAAGCCTGACCCAGCAACGCCGCGTGAAGGAAGAAGGCTTTCGGGTTGTAAACTTCTTTTGTCAGGGAAGAGGAGAAGACTGTACCTGACGAATAAGCTCCGGCT	Mancabelli	Oscillospira	80% Study
dd6b6bb316d46b42058ca108eefb8c8f	AGTGGGGAATATTGGGCAATGGGCGCAAGCCTGACCCAGCAACGCCGCGTGAAGGAAGAAGGCTTTCGGGTTGTAAACTTCTTTTATCAGGGACGAAGAGATGACGGTACCTGATGAATAAGCCACGGCT	Mancabelli	Oscillospira	80% Study
41985de9f56458ef3c552d1b2b66eaa8	AGTGGGGAATATTGGGCAATGGGCGCAAGCCTGACCCAGCAACGCCGCGTGAAGGAAGAAGGCCCTCGGGTTGTAAACTTCTTTTGTCAGGGACGAAGAAAGTGACGGTACCTGACGAATAAGCCACGGC	Mancabelli	Oscillospira	80% Study
83bb3e9d80e1a4bbfb1188adc3049f71	AGTGGGGAATATTGGGCAATGGGCGCAAGCCTGACCCAGCAACGCCGCGTGAAGGAAGAAGGCCCTCGGGTTGTAAACTTCTTTTCTTAGGGACGAAGCAAGTGACGGTACCTAAGGAATAAGCCACGGC	Mancabelli	Oscillospira	80% Study
5b53e1602a2409f1c1705b28bfa8ead8	AGGGGGGGAATATTGGGCAATGGGCGCAAGCCTGACCCAGCAACGCCGCGTGAAGGATGAAGGCCCTCGGGTTGTAAACTTCTTTTAACAGGGACGAATAAAGTGACGGTACCTGTTGAATAAGCCACGG	Mancabelli	Oscillospira	80% Study
25ef2ca831ed3b94b1e280085fa64e73	AGTGGGGAATATTGGGCAATGGGCGCAAGCCTGACCCAGCAACGCCGCGTGAAGGAAGAAGGCTTTCGGGTTGTAAACTTCTTTTGTCAGGGAAGAGCAGAAGACGGTACCTGACGAATAAGCCACGGCT	Mancabelli	Oscillospira	80% Study
5bed566ed151a1e9471e092fc8e51af0	AGTGGGGAATATTGGGCAATGGGCGCAAGCCTGACCCAGCAACGCCGCGTGAAGGAAGAAGGCTTTCGGGTTGTAAACTTCTTTTATTCGGGACGATGATGACGGTACCGAATGAATAGCTCCGGCTAAC	Mancabelli	Oscillospira	80% Study
2ccc722461261f5b3db350214b7462fa	AGTGGGGAATATTGGGCAATGGGCGCAAGCCTGACCCAGCAACGCCGCGTGAAGGATGAAGGCTTTCGGGTTGTAAACTTCTTTTATCAGGGACGAAGAAGATGACGGTACCTGATGAATAAGCCACGGC	Mancabelli	Oscillospira	80% Study
e7c451e4cd94a2973896485ff55ee15d	AGGGGGGGAATATTGGGCAATGGGCGCAAGCCTGACCCAGCAACGCCGCGTGAAGGAAGAAGGCTTTCGGGTTGTAAACTTCTTTTGTCAGGGACGAACAAATGACGGTACCTGACGAATAAGCCACGGC	Mancabelli	Oscillospira	80% Study
6dfc03b84f65c555a11717b8528aad81	AGTGGGGAATATTGGGCAATGGGCGAAAGCCTGACCCAGCAACGCCGCGTGAAGGAAGAAGGCTTTCGGGTTGTAAACTTCTTTTATCAGGGACGAAGGATGTGACGGTACCTGATGAATAAGCTCCGGC	Mancabelli	Oscillospira	80% Study
350206747a3dc4d0d50122df5e1445d3	AGTGGGGAATATTGGGCAATGGGCGCAAGCCTGACCCAGCAACGCCGCGTGAAGGAAGAAGGCTTTCGGGTTGTAAACTTCTTTTGTCAGGGAAGATGAACGAGACTGTACCTGACGAATAAGCCACGGC	Mancabelli	Oscillospira	80% Study
0ae3debfa5a8dac5d0cc336ef97c7c75	AGTGGGGAATATTGGGCAATGGGCGCAAGCCTGACCCAGCAACGCCGCGTGAAGGATGAAGGCTTTCGGGTTGTAAACTTCTTTTATTCGGGACGAAGAAAATGACGGTACCGAATGAAATAAGCCACGG	Mancabelli	Oscillospira	80% Study
7f692d156133e4e3d97a8bbe4edb5fc8	AGTGGGGAATATTGGGCAATGGGCGCAAGCCTGACCCAGCAACGCCGCGTGAAGGATGAAGGCCCTCGGGTTGTAAACTTCTTTTAACAGGGACGAATAAAAGTGACGGTACCTGTTGAATAAGCCACGG	Mancabelli	Oscillospira	80% Study
85d23cb0bf9643fa65de6554c49e7c62	AGTGGGGAATATTGGGCAATGGGCGCAAGCCTGACCCAGCAACGCCGCGTGAAGGAAGAAGGCTTTCGGGTTGTAAACTTCTTTTAAGGGGGAAGAGCAGAAGACGGTACCCCTTGAATAAGCCACGGCT	Mancabelli	Oscillospira	80% Study
e6ca7968199f8666da29a7b7fa1079b7	AGTGGGGAATATTGGGCAATGGGCGCAAGCCTGACCCAGCAACGCCGCGTGAAGGAAGAAGGCTTTCGGGTTGTAAACTTCTTTTCTCAGGGACGAACGCAATGACGGTACCTGAGGAATAAGCCACGGC	Mancabelli	Oscillospira	80% Study
61aca2f3d42b1bdaaa5c71ddf2f22e2c	AGTGGGGAATATTGGGCAATGGGCGCAAGCCTGACCCAGCAACGCCGCGTGAAGGAAGAAGGCTTTCGGGTTGTAAACTTCTTTTGTCAGGGAAGAGTAGAAGACGGTACCTGACGAATAAGCCACGGCT	Mancabelli	Oscillospira	80% Study
8a152b20bbb271e71c8d55b1b9225746	AGTGGGGAATATTGGGCAATGGGCGCAAGCCTGACCCAGCAACGCCGCGTGAAGGAAGAAGGCTTTCGGGTTGTAAACTTCTTTTCTGGGGGACGAACAAATGACGGTACCCCAGGAATAAGCCACGGCT	Mancabelli	Oscillospira	80% Study
64c57c25bf64b9071ecd5b6eee90fa5c	AGTGGGGAATATTGGGCAATGGGCGCAAGCCTGACCCAGCAACGCCGCGTGAAGGAAGAAGGCCCTCGGGTTGTAAACTTCTTTTCTATAGGACGAAGAAGTGACGGTACTATAGGAATAAGCCACGGCT	Mancabelli	Oscillospira	80% Study
0fd5b464f8b67067c13d1a85f89a2e10	AGGGGGGAATATTGGGCAATGGGCGCAAGCCTGACCCAGCAACGCCGCGTGAAGGAAGAAGGCTTTCGGGTTGTAAACTTCTTTTGTCAGGGAAGAGTAGAAGACGGTACCTGACGAATAAGCCACGGCT	Mancabelli	Oscillospira	80% Study
a65b4b0e119c646e6d35cc27d28675ac	AGGGGGGAATATTGGGCAATGGGCGCAAGCCTGACCCAGCAACGCCGCGTGAAGGAAGAAGGCTTTCGGGTTGTAAACTTCTTTTGTCAGGGACGAGTAGAAGACGGTACCTGACGAATAAGCCACGGCT	Mancabelli	Oscillospira	80% Study
21768e56ed5bdbf74dbd1c079e4403fe	AGTGGGGAATATTGGGCAATGGGCGCAAGCCTGACCCAGCAACGCCGCGTGAAGGAAGAAGGCTTTCGGGTTGTAAACTTCTTTTAAGGGGGACGAACAAATGACGGTACCCCTTGAATAAGCCACGGCT	Mancabelli	Oscillospira	80% Study
852cba6247bdb4fbc21ade8006fbb64e	AGTGGGGAATATTGGGCAATGGGCGCAAGCCTGACCCAGCAACGCCGCGTGAAGGAAGAAGGCTTTCGGGTTGTAAACTTCTTTTATTCGGGACGAAGAAATGACGGTACCGAATGAATAAGCCACGGCT	Mancabelli	Oscillospira	80% Study
bfec7cb39170fbe2e68438826e0b266f	AGTGGGGAATATTGGGCAATGGGCGCAAGCCTGACCCAGCAACGCCGCGTGAAGGATGAAGGCTTTCGGGTTGTAAACTTCTTTTATTCGGGACGAAGCAAGTGACGGTACCGAATGAATAAGCCACGGC	Mancabelli	Oscillospira	80% Study
0ac429dea0d0e2624a085ca972c0399f	AGGGGGGAATATTGGGCAATGGGCGCAAGCCTGACCCAGCAACGCCGCGTGAAGGAAGAAGGCTTTCGGGTTGTAAACTTCTTTTGTCAGGGAACAGTAGAAGAGGGTACCTGACGAATAAGCTCCGGCT	Mancabelli	Oscillospira	80% Study
ee527d1c0a3eb9264f3d356b73e5f58c	AGTGGGGAATATTGGGCAATGGGCGCAAGCCTGACCCAGCAACGCCGCGTGAAGGAAGAAGGCCTTCGGGTTGTAAACTTCTTTTCTTAGGGACGAATGAAGTGACGGTACCTAAGGAATAAGCCACGGC	Mancabelli	Oscillospira	80% Study
293c1d0729f596a615416d25148e320e	AGTGGGGAATATTGGGCAATGGGCGCAAGCCTGACCCAGCAACGCCGCGTGAAGGAAGAAGGCTTTCGGGTTGTAAACTTCTTTTAACAGGGAAGAGCAGAAGACGGTACCTGTTGAATAAGCCACGGCT	Mancabelli	Oscillospira	80% Study
e9f136f27977897c292b9fa8136b64f6	GTGGGGAATATTGGGCAATGGGCGCAAGCCTGACCCAGCAACGCCGCGTGAAGGAAGAAGGCTTTCGGGTTGTAAACTTCTTTTGTCAGGGACGAACAAATGACGGTACCTGACGAATAAGCCACGGCTA	Mancabelli	Oscillospira	80% Study
36360657fefa4f6e13d4c78297f3eb44	AGGGGGGGAATATTGGGCAATGGGCGCAAGCCTGACCCAGCAACGCCGCGTGAAGGAAGAAGGCTTTCGGGTTGTAAACTTCTTTTGTCAGGGAACAGTAGAAGAGGGTACCTGACGAATAAGCTCCGGC	Mancabelli	Oscillospira	80% Study
732ad991f4ef648552ee904fc288f6fd	AGTGGGGAATATTGGGCAATGGGCGCAAGCCTGACCCAGCAACGCCGCGTGAAGGAAGAAGGCTTTCGGGTTGTAAACTTCTTTTCTTAGGGACGAAGGAAGTGACGGTACCTAAGGAATAAGCTCCGGC	Mancabelli	Oscillospira	80% Study
8651a505fc97913ae0fec710600d3376	AGGGGGGGAATATTGGGCAATGGGCGCAAGCCTGACCCAGCAACGCCGCGTGAAGGAAGAAGGCTTTCGGGTTGTAAACTTCTTTTATCAGGGACGAAGGAATGACGGTACCTGATGAATAAGCCACGGC	Mancabelli	Oscillospira	80% Study
ab2b40c217111ff79412be647c868f2f	AGTGGGGAATATTGGGCAATGGGCGAAAGCCTGACCCAGCAACGCCGCGTGAAGGAAGAAGGCTTTCGGGTTGTAAACTTCTTTTATCAGGGACGAAGTAGTGACGGTACCTGATGAATAAGCTCCGGCT	Mancabelli	Oscillospira	80% Study
e089b9276dd948eafb0e914f76d047b9	AGTGGGGAATATTGGGCAATGGGCGCAAGCCTGACCCAGCAACGCCGCGTGAAGGAAGAAGGCCTTCGGGTTGTAAACTTCTTTTGTCAGGGACGAAGAAGTGACGGTACCTGACGAATAAGCCACGGCT	Mancabelli	Oscillospira	80% Study
678937c7b25c7361ebd95ceb323dee55	AGGGGGGAATATTGGGCAATGGGCGCAAGCCTGACCCAGCAACGCCGCGTGAAGGAAGAAGGCTTTCGGGTTGTAAACTTCTTTTCTCAGGGACGAAGAAAGTGACGGTACCTGAGGAATAAGCCACGGC	Mancabelli	Oscillospira	80% Study
3d12dac7dc56412a0d7d26101901bfb1	AGTGGGGAATATTGGGCAATGGGCGCAAGCCTGACCCAGCAACGCCGCGTGAAGGAAGAAGGCCCTCGGGTTGTAAACTTCTTTTATTCGGGACGAAACAAATGACGGTACCGAATGAATAAGCCACGGC	Mancabelli	Oscillospira	80% Study
149de90dcf3cf176f5ac290ef58fd424	AGTGGGGAATATTGGGCAATGGGCGCAAGCCTGACCCAGCAACGCCGCGTGAAGGAAGAAGGCCCTCGGGTTGTAAACTTCTTTTATCAGGGACGAAACAAATGACGGTACCTGATGAATAAGCCACGGC	Mancabelli	Oscillospira	80% Study
6306f15ea1c063197559cffa0f1b120f	AGGGGGGAATATTGGGCAATGGGCGCAAGCCTGACCCAGCAACGCCGCGTGAAGGAAGAAGGCTTTCGGGTTGTAAACTTCTTTTAACAGGGAAGAGCAGAAGACGGTACCTGTTGAATAAGCCACGGCT	Mancabelli	Oscillospira	80% Study
81dda9586efd21c0c99d6519c9d9e5c2	AGTGGGGAATATTGGGCAATGGGCGCAAGCCTGACCCAGCAACGCCGCGTGAAGGAAGAAGGCTTTCGGGTTGTAAACTTCTTTTCTCAGGGACGAAGAAAATGACGGTACCTGAGGAATAAGCCACGGC	Mancabelli	Oscillospira	80% Study
0ad61941e593d60d7b759ab8d112c031	AGTGGGGAATATTGGGCAATGGGCGCAAGCCTGACCCAGCAACGCCGCGTGAAGGAAGAAGGCTTTCGGGTTGTAAACTTCTTTTGTTAGGGACGAACCAATGACGGTACCTAACGAATAAGCCACGGCT	Mancabelli	Oscillospira	80% Study
dc6aa4fbb5bc9bf0c421318afd11befb	AGTGGGGAATATTGGGCAATGGGCGCAAGCCTGACCCAGCAACGCCGCGTGAAGGAAGAAGGCTTTCGGGTTGTAAACTTCTTTTCTCAGGGACGAAACAAATGACGGTACCTGAGGAATAAGCCACGGC	Mancabelli	Oscillospira	80% Study
b6f653144d4a334d55eb89af5890624c	AGTGGGGAATATTGGGCAATGGGCGCAAGCCTGACCCAGCAACGCCGCGTGAAGGAAGAAGGCTTTCGGGTTGTAAACTTCTTTTGTTAGGGACGAATCAATGACGGTACCTAACGAATAAGCCACGGCT	Mancabelli	Oscillospira	80% Study
9a340b0b0c7637612a38ef25e84799ca	AGTGGGGAATATTGGGCAATGGGCGCAAGCCTGACCCAGCAACGCCGCGTGAAGGAAGAAGGCCCTCGGGTTGTAAACTTCTTTTGACAGGGACGAAACAAATGACGGTACCTGTCGAATAAGCCACGGC	Mancabelli	Oscillospira	80% Study
10f19ab3ebef04460c0008b71c51e939	AGTGGGGAATATTGGGCAATGGGCGCAAGCCTGACCCAGCAACGCCGCGTGAAGGAAGAAGGCTTTCGGGTTGTAAACTTCTTTTCTCAGGGACGAAATAAATGACGGTACCTGAGGAATAAGCCACGGC	Mancabelli	Oscillospira	80% Study
c53af0b8b568eef23104e2c9f685e4c7	AGTGGGGAATATTGGGCAATGGGCGCAAGCCTGACCCAGCAACGCCGCGTGAAGGAAGAAGGCTCTCGGGTTGTAAACTTCTTTTGACAGGGACGAAGAAAATGACGGTACCTGTCGAATAAGCTCCGGC	Mancabelli	Oscillospira	80% Study
fae46a3b1e7546660165a49fbd414aa0	AGTGGGGAATATTGGGCAATGGGCGCAAGCCTGACCCAGCAACGCCGCGTGAAGGAAGAAGGCTTTCGGGTTGTAAACTTCTTTTCTCAGGGACGAAGGAAGTGACGGTACCTGAGGAACAAGCCACGGC	Mancabelli	Oscillospira	80% Study
08a1e2775be5f2a876e3e79d76ba4b9b	AGGGGGGAATATTGGGCAATGGGCGCAAGCCTGACCCAGCAACGCCGCGTGAAGGAAGAAGGCTTTCGGGTTGTAAACTTCTTTTGACAGGGAAGAGCAGAAGACGGTACCTGTCGAATAAGCCACGGCT	Mancabelli	Oscillospira	80% Study
2397cb5b969bbc0bea6f6685e2fe64ee	CTACGGGGCGCAGCAGTGGGGAATATTGGGCAATGGGCGCAAGCCTGACCCAGCAACGCCGCGTGAAGGAAGAAGGCTTTCGGGTTGTAAACTTCTTTTCTCAGGGACGAAGCAAGTGACGGTACCTGAG	Mancabelli	Oscillospira	80% Study
b9795f784df50e850472535c6b130a2c	CTACGGGGCGCAGCAGTGGGGAATATTGGGCAATGGGCGCAAGCCTGACCCAGCAACGCCGCGTGAAGGATGAAGGCTTTCGGGTTGTAAACTTCTTTTGTCAGGGACGAAACAAATGACGGTACCTGAC	Mancabelli	Oscillospira	80% Study
7a5dfdfc9be9fe137eceff55a8f4c9d8	CTACGGGACGCAGCAGTGGGGAATATTGGGCAATGGGCGCAAGCCTGACCCAGCAACGCCGCGTGAAGGAAGAAGGCTTTCGGGTTGTAAACTTCTTTTCTCAGGGACGAAGCAAGTGACGGTACCTGAG	Mancabelli	Oscillospira	80% Study
a1ef3cd98a7666b20f8652583aba9f32	CTACGGGGCGCAGCAGTGGGGAATATTGGGCAATGGGCGCAAGCCTGACCCAGCAACGCCGCGTGAAGGAAGAAGGCTTTCGGGTTGTAAACTTCTTTTGTCAGGGACGAAGCAAGTGACGGTACCTGAC	Mancabelli	Oscillospira	80% Study
eab6e67f881637e92b61918aba005bd1	CTACGGGGCGCAGCAGTGGGGAATATTGGGCAATGGGCGAAAGCCTGACCCAGCAACGCCGCGTGAAGGAAGAAGGCTTTCGGGTTGTAAACTTCTTTTATCAGGGACGAAGGATGTGACGGTACCTGAT	Mancabelli	Oscillospira	80% Study
257fb143ece837e00b7a51fc3ed619de	CTACGGGGCGCAGCAGTGGGGAATATTGGGCAATGGGCGCAAGCCTGACCCAGCAACGCCGCGTGAAGGAAGAAGGCTTTCGGGTTGTAAACTTCTTTTCTCAGGGACGAAACAAATGACGGTACCTGAG	Mancabelli	Oscillospira	80% Study
cabe7149c62a5f308e9328b29acfef87	CTACGGGGCGCAGCAGTGGGGAATATTGGGCAATGGGCGCAAGCCTGACCCAGCAACGCCGCGTGAAGGAAGAAGGCTTTCGGGTTGTAAACTTCTTTTGTCGGGGACGAGTAGAAGACGGTACCTGGCG	Mancabelli	Oscillospira	80% Study
abc55ae5b7987858b5eefc0deb250a6f	CTACGGGGCGCAGCAGTGGGGAATATTGGGCAATGGGCGCAAGCCTGACCCAGCAACGCCGCGTGAAGGAAGAAGGCCCTCGGGTTGTAAACTTCTTTTGTCAGGGACGAAGCAAGTGACGGTACCTGAC	Mancabelli	Oscillospira	80% Study
d7e291713bad2ee1ba119157ff3dd524	CTACGGGGCGCAGCAGTGGGGAATATTGGGCAATGGGCGCAAGCCTGACCCAGCAACGCCGCGTGAAGGAAGAAGGCTTTCGGGTTGTAAACTTCTTTTGTCAGGGAACAGTAGAAGAGGGTACCTGACG	Mancabelli	Oscillospira	80% Study
19d363e788ccbfe8f4934f67d3c1173b	CTACGGGGCGCAGCAGTGGGGAATATTGGGCAATGGGCGCAAGCCTGACCCAGCAACGCCGCGTGAAGGAAGAAGGCTTTCGGGTTGTAAACTTCTTTTGTCAGGGACGAGTAGAAGACGGTACCTGACG	Mancabelli	Oscillospira	80% Study
047cde35c2966195f305a8587f512c4b	AGTGGGGAATATTGGGCAATGGGCGCAAGCCTGACCCAGCAACGCCGCGTGAAGGAAGAAGGCTTTCGGGTTGTAAACTTCTTTTCTCAGGGACGAAGGAAGTGACGGTACCTGAGGAATAAGCCACGGC	Mancabelli	Oscillospira	80% Study
3db9d9ea387cee36c76f26837198a960	AGTGGGGAATATTGGGCAATGGGCGGAAGCCTGACCCAGCAACGCCGCGTGAAGGAAGAAGGCCCTCGGGTTGTAAACTTCTTTTGTCAGGGACGAAGCAAGTGACGGTACCTGACGAATAAGCCACGGC	Mancabelli	Oscillospira	80% Study
ccfa3cc582aec5bd544c451d1690ef24	AGTGGGGAATATTGGGCAATGGGCGCAAGCCTGACCCAGCAACGCCGCGTGAAGGATGAAGGCTTTCGGGTTGTAAACTTCTTTTATCAGGGACGAAAAAAATGACGGTACCTGATGAATAAGCCACGGC	Mancabelli	Oscillospira	80% Study
0b82cad8aee80e097018f2ed3464e5dd	AGTGGGGAATATTGGGCAATGGACGCAAGTCTGACCCAGCAACGCCGCGTGAAGGAAGAAGGCTTTCGGGTTGTAAACTTCTTTGACAGGGGAAGAGCAGAAGACGGTACCCTGAAAACAAGCCACGGCT	Mancabelli	Oscillospira	80% Study
0b22d7a53d1d5736a42fb7310d8a7d03	TACGGGGCGCAGCAGTGGGGAATATTGGGCAATGGGCGCAAGCCTGACCCAGCAACGCCGCGTGAAGGAAGAAGGCTTTCGGGTTGTAAACTTCTTTTGTCAGGGACGAACAAATGACGGTACCTGACGA	Mancabelli	Oscillospira	80% Study
a869963b19d000895cb8f7107f6bcc42	TACGGGGCGCAGCAGTGGGGAATATTGGGCAATGGGCGCAAGCCTGACCCAGCAACGCCGCGTGAAGGAAGAAGGCTTTCGGGTTGTAAACTTCTTTTGTCAGGGACGAAGCAAGTGACGGTACCTGACG	Mancabelli	Oscillospira	80% Study
cc4c057efbab0d03545e53a1381079ec	TACGGGGCGCAGCAGTGGGGAATATTGGGCAATGGGCGCAAGCCTGACCCAGCAACGCCGCGTGAAGGATGAAGGCCCTCGGGTTGTAAACTTCTTTTAACAGGGACGAATAAAGTGACGGTACCTGTTG	Mancabelli	Oscillospira	80% Study
5b17fac42ccfc20d1040b252a608c80e	TACGGGGCGCAGCAGTGGGGAATATTGGGCAATGGGCGCAAGCCTGACCCAGCAACGCCGCGTGAAGGAAGAAGGCCCTCGGGTTGTAAACTTCTTTTGTCAGGGACGAAGCAAGTGACGGTACCTGACG	Mancabelli	Oscillospira	80% Study
7926315ec79c0ee7b77bae3d6a321ce1	TACGGGGCGCAGCAGTGGGGAATATTGGGCAATGGACGCAAGTCTGACCCAGCAACGCCGCGTGAAGGAAGAAGGCTTTCGGGTTGTAAACTTCTTTTGTCAGGGAAGAGTAGAAGACGGTACCTGACGA	Mancabelli	Oscillospira	80% Study
419a2617ce1ef52aeb94b166ad338a27	TACGGGGCGCAGCAGTGGGGAATATTGGGCAATGGGCGCAAGCCTGACCCAGCAACGCCGCGTGAAGGAAGAAGGCTTTCGGGTTGTAAACTTCTTTTGTCAGGGAACAGTAGAAGAGGGTACCTGACGA	Mancabelli	Oscillospira	80% Study
f7086c7065b3e3824bc94d7ae29748f7	TACGGGACGCAGCAGTGGGGAATATTGGGCAATGGACGCAAGTCTGACCCAGCAACGCCGCGTGAAGGAAGAAGGCTTTCGGGTTGTAAACTTCTTTTGTCAGGGAAGAGTAGAAGACGGTACCTGACGA	Mancabelli	Oscillospira	80% Study
68c638adaebcaa4429b572eab41b17ba	TACGGGGGGCAGCAGTGGGGAATATTGGGCAATGGGCGCAAGCCTGACCCAGCAACGCCGCGTGAAGGAAGAAGGCCCTCGGGTTGTAAACTTCTTTTGTCAGGGACGAAGCAAGTGACGGTACCTGACG	Mancabelli	Oscillospira	80% Study
1e127b544dc93b4ef46fd3710e0e5ab7	TACGGGGCGCAGCAGTGGGGAATATTGGGCAATGGGCGCAAGCCTGACCCAGCAACGCCGCGTGAAGGAAGAAGGCCTTCGGGTTGTAAACTTCTTTTCTTAGGGACGAATGAAGTGACGGTACCTAAGG	Mancabelli	Oscillospira	80% Study
71cbe15210f7ed1822b46cfb49575493	TACGGGACGCAGCAGTGGGGAATATTGGGCAATGGGCGCAAGCCTGACCCAGCAACGCCGCGTGAAGGAAGAAGGCTTTCGGGTTGTAAACTTCTTTTCTCAGGGACGAAGAAAATGACGGTACCTGAGG	Mancabelli	Oscillospira	80% Study
7807261ee3babf65d77e6a850a7c7ef0	TACGGGACGCAGCAGTGGGGAATATTGGGCAATGGGCGCAAGCCTGACCCAGCAACGCCGCGTGAAGGAAGAAGGCCCTCGGGTTGTAAACTTCTTTTGTCAGGGACGAAGCAAGTGACGGTACCTGACG	Mancabelli	Oscillospira	80% Study
c684acb862bf33c9ad28c660205716db	TACGGGACGCAGCAGTGGGGAATATTGGGCAATGGGCGCAAGCCTGACCCAGCAACGCCGCGTGAAGGAAGAAGGCTTTCGGGTTGTAAACTTCTTTTGTCAGGGAACAGTAGAAGAGGGTACCTGACGA	Mancabelli	Oscillospira	80% Study
c84fa591caa24053024a9a537cdcb4cc	TACGGGGCGCAGCAGTGGGGAATATTGGGCAATGGGCGCAAGCCTGACCCAGCAACGCCGCGTGAAGGAAGAAGGCTTTCGGGTTGTAAACTTCTTTTGTCAGGGAAGAGCAGAAGACTGTACCTGACGA	Mancabelli	Oscillospira	80% Study
bd8779e36d774dbbdac722c0c269c59d	AGTGGGGAATATTGGGCAATGGGCGCAAGCCTGACCCAGCAACGCCGCGTGAAGGAAGAAGGCTTTCGGGTTGTAAACTTCTTTTGTCAGGGAAGATGAAAGAGACTGTACCTGACGAATAAGCCACGGC	Mancabelli	Oscillospira	80% Study
89a846e605091c05bd100666e65c08df	AGTGGGGAATATTGGGCAATGGGCGCAAGCCTGACCCAGCAACGCCGCGTGAAGGAAGAAGGCTCTCGGGTTGTAAACTTCTTTTGTCAGGGACGAACACAATGACGGTACCTGACGAATAAGCCACGGC	Mancabelli	Oscillospira	80% Study
784fb45a5544df1da903ab21594ceab3	AGTGGGGAATATTGGGCAATGGGCGCAAGCCTGACCCAGCAATGCCGCGTGAAGGAAGAAGGCTTTCGGGTTGTAAACTTCTTTGACAGGGGAAGAGCAGAAGACGGTACCCTGAAAACAAGCCACGGCT	Mancabelli	Oscillospira	80% Study
32b0dbfbb9b2b98062f48e5dfd8e026a	AGGGGGGGAATATTGGGCAATGGGCGCAAGCCTGACCCAGCAACGCCGCGTGAAGGAAGAAGGCTTTCGGGTTGTAAACTTCTTTTCTCAGGGACGAAGAAAATGACGGTACCTGAGGAATAAGCCACGG	Mancabelli	Oscillospira	80% Study
6607b4249fab54686ca08e6c18ea4880	AGTGGGGAATATTGGGCAATGGGCGCAAGCCTGACCCAGCAACGCCGCGTGAAGGAAGAAGGCTCTCGGGTTGTAAACTTCTTTTGACAGGGACGAAACAAATGACGGTACCTGTCGAATAAGCTCCGGC	Mancabelli	Oscillospira	80% Study
33cccfc95e01ec9da1a883a20cce1fc6	AGTGGGGAATATTGGGCAATGGGCGCAAGCCTGACCCAGCAACGCCGCGTGAAGGAAGAAGGCTTTCGGGTTGTAAACTTCTTTTGTCAGGGAAGAGCAGAAGACTGTACCTGACGAATAAGCCACGGCT	Mancabelli	Oscillospira	80% Study
473657e7bb737c570e835b0ddea4d3f6	AGTGGGGAATATTGGGCAATGGGCGCAAGCCTGACCCAGCAATGCCGCGTGAAGGAAGAAGGCTTTCGGGTTGTAAACTTCTTTGACAGGGGAAGAGACGAAGACGGTACCCTGAAAACAAGCCACGGCT	Mancabelli	Oscillospira	80% Study
b6013921e1d645999daaceffdd6038ec	AGTGGGGAATATTGGGCAATGGGCGCAAGCCTGACCCAGCAACGCCGCGTGAAGGAAGAAGGCTTTCGGGTTGTAAACTTCTTTTATTCGGGACGATGATGACGGTACCGAATGAATAAGCTCCGGCTAA	Mancabelli	Oscillospira	80% Study
f4be37fd2babe7ee7bebc1a1d36a4ffc	AGTGGGGAATATTGGGCAATGGGCGCAAGCCTGACCCAGCAACGCCGCGTGAAGGAAGAAGGCTTTCGGGTTGTAAACTTCTTTTGTCAGGGACGAAGTAAGTGACGGTACCTGACGAATAAGCCACGGC	Mancabelli	Oscillospira	80% Study
24ced03f009c7b7a08cea34841947d40	TACGGGGCGCAGCAGTGGGGAATATTGGGCAATGGGCGCAAGCCTGACCCAGCAACGCCGCGTGAAGGAAGAAGGCTCTCGGGTTGTAAACTTCTTTTAAGAGGGACGAAACAAATGACGGTACCTCTTG	Mancabelli	Oscillospira	80% Study
984b918df7586e34f66da1f6bf90bed5	ACGGGGGGCAGCAGTGGGGAATATTGGGCAATGGGCGCAAGCCTGACCCAGCAACGCCGCGTGAAGGATGAAGGCCCTCGGGTTGTAAACTTCTTTTAACAGGGACGAATAAAGTGACGGTACCTGTTGA	Mancabelli	Oscillospira	80% Study
fdb879447526d3cbcbc19735ee78a7b5	CAATGGGCGCAAGCCTGACCCAGCAACGCCGCGTGAAGGAAGAAGGCCCTCGGGTTGTAAACTTCTTTTGTCAGGGACGAAGCAAGTGACGGTACCTGACGAATAAGCCACGGCTAACTACGTGCCAGCA	Mancabelli	Oscillospira	80% Study
82da4148485d6eb448efa10e42ec1d47	CAATGGGCGCAAGCCTGACCCAGCAACGCCGCGTGAAGGAAGAAGGCTTTCGGGTTGTAAACTTCTTTTGTCAGGGAACAGTAGAAGAGGGTACCTGACGAATAAGCCACGGCTAACTACGTGCCAGCAG	Mancabelli	Oscillospira	80% Study
d7ff55a70157b9e88fa3cb92636e1cf6	CAATGGGCGAAAGCCTGACCCAGCAACGCCGCGTGAAGGAAGAAGGCTTTCGGGTTGTAAACTTCTTTTATCAGGGACGAAGGATGTGACGGTACCTGATGAATAAGCCACGGCTAACTACGTGCCAGCA	Mancabelli	Oscillospira	80% Study
e8848b3dc781ce19d2bd7bce9c4fdd7a	CAATGGGCGCAAGCCTGACCCAGCAACGCCGCGTGAAGGAAGAAGGCTTTCGGGTTGTAAACTTCTTTTGTCAGGGACGAACAAATGACGGTACCTGACGAATAAGCCACGGCTAACTACGTGCCAGCAG	Mancabelli	Oscillospira	80% Study
968dfccd3413010d45f277037c37f70f	CAATGGGCGCAAGCCTGACCCAGCAACGCCGCGTGAAGGAAGAAGGCTTTCGGGTTGTAAACTTCTTTTGTCAGGGAACAGTAGAAGAGGGTACCTGACGAATAAGCTCCGGCTAACTACGTGCCAGCAG	Mancabelli	Oscillospira	80% Study
f1dc1342e68dbf404ee037deacbe7b93	CAATGGGCGCAAGCCTGACCCAGCAACGCCGCGTGAAGGAAGAAGGCTTTCGGGTTGTAAACTTCTTTTGTCAGGGAAGAGGAGAAGACTGTACCTGACGAATAAGCTCCGGCTAACTACGTGCCAGCAG	Mancabelli	Oscillospira	80% Study
fa1815ef7d6a72eb8e6a6060b3960f31	CAATGGGCGCAAGCCTGACCCAGCAACGCCGCGTGAAGGAAGAAGGCTTTCGGGTTGTAAACTTCTTTTATTCGGGACGATAGTGACGGTACCGAATGAATAAGCCACGGCTAACTACGTGCCAGCAGCC	Mancabelli	Oscillospira	80% Study
078e7befe5ed38e1d46644bb93805858	CAATGGGCGAAAGCCTGACCCAGCAACGCCGCGTGAAGGAAGAAGGCTTTCGGGTTGTAAACTTCTTTTATCAGGGACGAAGTAGTGACGGTACCTGATGAATAAGCTCCGGCTAACTACGTGCCAGCAG	Mancabelli	Oscillospira	80% Study
50c6ad36b44679ed3432f29cae3aeaf9	CAATGGGCGCAAGCCTGACCCAGCAACGCCGCGTGAAGGAAGAAGGCTTTCGGGTTGTAAACTTCTTTTCTTAGGGACGAAGGAAGTGACGGTACCTAAGGAATAAGCTCCGGCTAACTACGTGCCAGCA	Mancabelli	Oscillospira	80% Study
883c45fb8e42f84d665cbfe49b27972c	CAATGGGCGCAAGCCTGACCCAGCAACGCCGCGTGAAGGAAGAAGGCTTTCGGGTTGTAAACTTCTTTTCTTGGGGACGAAACAAATGACGGTACCTAAGGAATAAGCTCCGGCTAACTACGTGCCAGCA	Mancabelli	Oscillospira	80% Study
833c369f9867ad1ae128212a3f5d3439	CAATGGGCGCAAGCCTGACCCAGCAACGCCGCGTGAAGGAAGAAGGCTTTCGGGTTGTAAACTTCTTTTGTCAGGGAAGATGAAAGAGACTGTACCTGACGAATAAGCCACGGCTAACTACGTGCCAGCA	Mancabelli	Oscillospira	80% Study
a2de5a82fbe20bd5a562892b3260b387	CAATGGACGCAAGTCTGACCCAGCAACGCCGCGTGAAGGAAGAAGGCTTTCGGGTTGTAAACTTCTTTTGTCAGGGAACAGTAGAAGAGGGTACCTGACGAATAAGCCACGGCTAACTACGTGCCAGCAG	Mancabelli	Oscillospira	80% Study
1039e01fbbd09d024e085c66093311ef	CAATGGGCGCAAGCCTGACCCAGCAACGCCGCGTGAAGGAAGAAGGCTTTCGGGTTGTAAACTTCTTTTATTCGGGACGAAGCAAGTGACGGTACCGAATGAATAAGCCACGGCTAACTACGTGCCAGCA	Mancabelli	Oscillospira	80% Study
6013f2d680276a29488635d7857b5d11	CAATGGGCGCAAGCCTGACCCAGCAACGCCGCGTGAAGGAAGAAGGCTTTCGGGTTGTAAACTTCTTTTGTCAGGGAAGATGAACGAGACTGTACCTGACGAATAAGCCACGGCTAACTACGTGCCAGCA	Mancabelli	Oscillospira	80% Study
5fd2e68885eebe52ee3457416a71b41b	AGCGGGGAATATTGGGCAATGGGCGCAAGCCTGACCCAGCAACGCCGCGTGAAGGAAGAAGGCCCTCGGGTTGTAAACTTCTTTTGTCAGGGACGAAGCAAGTGACGGTACCTGACGAATAAGCCACGGC	Mancabelli	Oscillospira	80% Study
326e79768b7ea35f8a67680928cd5752	AGCGGGGAATATTGGGCAATGGGCGCAAGCCTGACCCAGCAACGCCGCGTGAAGGAAGAAGGCCCTCGGGTTGTAAACTTCTTTTGTCAGGGACGAAGAAAGTGACGGTACCTGACGAATAAGCCACGGC	Mancabelli	Oscillospira	80% Study
def473b1a8515a085e9461e7eb8bdbe5	AGCGGGGAATATTGGGCAATGGGCGCAAGCCTGACCCAGCAACGCCGCGTGAAGGAAGAAGGCTTTCGGGTTGTAAACTTCTTTTGTCAGGGACGAACAAATGACGGTACCTGACGAATAAGCCACGGCT	Mancabelli	Oscillospira	80% Study
1c6836cf5e1150f5e103131544624386	AGCGGGGAATATTGGGCAATGGGCGCAAGCCTGACCCAGCAACGCCGCGTGAAGGAAGAAGGCTTTCGGGTTGTAAACTTCTTTTATCAGGGACGAAGGAATGACGGTACCTGATGAATAAGCCACGGCT	Mancabelli	Oscillospira	80% Study
18e81b188ed69f08a474831cd082541e	AGCGGGGAATATTGGGCAATGGGCGCAAGCCTGACCCAGCAACGCCGCGTGAAGGATGAAGGCCCTCGGGTTGTAAACTTCTTTTAACAGGGACGAATAAAGTGACGGTACCTGTTGAATAAGCCACGGC	Mancabelli	Oscillospira	80% Study
456107e466ff98b945ab3181fc523197	AGCGGGGAATATTGGGCAATGGGCGCAAGCCTGACCCAGCAACGCCGCGTGAAGGATGAAGGCTTTCGGGTTGTAAACTTCTTTTATCAGGGACGAAATAAATGACGGTACCTGATGAATAAGCCACGGC	Mancabelli	Oscillospira	80% Study
9a3a3a1eef9ea5ac15a25aeb3c04e229	AGCGGGGAATATTGGGCAATGGGCGCAAGCCTGACCCAGCAATGCCGCGTGAAGGAAGAAGGCTTTCGGGTTGTAAACTTCTTTTGTCAGGGAAGAGAAGAAGACGGTACCTGACGAATAAGCCACGGCT	Mancabelli	Oscillospira	80% Study
b35ac551d1490d32dd8b42403686aca2	AGCGGGGAATATTGGGCAATGGGCGCAAGCCTGACCCAGCAACGCCGCGTGAAGGAAGAAGGCTTTCGGGTTGTAAACTTCTTTTGTCAGGGAACAGTAGAAGAGGGTACCTGACGAATAAGCCACGGCT	Mancabelli	Oscillospira	80% Study
2db423d203fd9549b6cbc7c130aad31a	AGGGGGGAATATTGGGCAATGGGCGCAAGCCTGACCCAGCAACGCCGCGTGAAGGAAGAAGGCTTTCGGGTTGTAAACTTCTTTTCTCAGGGACGAAGCAAGTGACGGTACCTGAGGAATAAGCCACGGC	Mancabelli	Oscillospira	80% Study
ac858b6edf645a266010457d642120de	AGTGGGGAATATTGGGCAATGGGCGCAAGCCTGACCCAGCAACGCCGCGTGAAGGATGAAGGCTTTCGGGTTGTAAACTTCTTTTATCAGGGACGAACAAAGTGACGGTACCTGATGAATAAGCCACGGC	Mancabelli	Oscillospira	80% Study
30e045d3ab1a3b43f3d0eb1491fba4f0	AGTGGGGAATATTGGGCAATGGGCGCAAGCCTGACCCAGCAACGCCGCGTGAAGGAAGAAGGCTTTCGGGTTGTAAACTTCTTTTGTCGGGGACGAACAAATGACGGTACCTGACGAATAAGCCACGGCT	Mancabelli	Oscillospira	80% Study
0d051874f7ed07da34c0b56950afe3db	TACGGGAGGCAGCAGTGGGGAATATTGGGCAATGGGCGCAAGCCTGACCCAGCAACGCCGCGTGAAGGAAGAAGGCTTTCGGGTTGTAAACTTCTTTTGTCAGGGACGAACAAATGACGGTACCTGACGA	Mancabelli	Oscillospira	80% Study
36db8957df512560ff6eeeb868ed0bb8	TACGGGAGGCAGCAGTGGGGAATATTGGGCAATGGGCGCAAGCCTGACCCAGCAACGCCGCGTGAAGGAAGAAGGCCCTCGGGTTGTAAACTTCTTTTGTCAGGGACGAAGCAAGTGACGGTACCTGACG	Mancabelli	Oscillospira	80% Study
8ea0ae3de7994a92724af73d40503b41	TACGGGGGGCAGCAGTGGGGAATATTGGGCAATGGGCGCAAGCCTGACCCAGCAACGCCGCGTGAAGGAAGAAGGCTTTCGGGTTGTAAACTTCTTTTGTCAGGGACGAACAAATGACGGTACCTGACGA	Mancabelli	Oscillospira	80% Study
7143dae184b65902a9d58f08d8f1a5dd	TACGGGACGCAGCAGTGGGGAATATTGGGCAATGGGCGCAAGCCTGACCCAGCAACGCCGCGTGAAGGAAGAAGGCTTTCGGGTTGTAAACTTCTTTTGTCAGGGACGAACAAATGACGGTACCTGACGA	Mancabelli	Oscillospira	80% Study
2cbaa3d274f0568d126a58f72f0f4952	TACGGGGCGCAGCAGTGGGGAATATTGGGCAATGGGCGCAAGCCTGACCCAGCAACGCCGCGTGAAGGAAGAAGGCTTTCGGGTTGTAAACTTCTTTTGTCGGGGACGAACAAATGACGGTACCTGACGA	Mancabelli	Oscillospira	80% Study
fad183ee2a75434e688e584f3a96091f	TACGGGGGGCAGCAGTGGGGAATATTGGGCAATGGGCGCAAGCCTGACCCAGCAACGCCGCGTGAAGGATGAAGGCCCTCGGGTTGTAAACTTCTTTTAACAGGGACGAATAAAGTGACGGTACCTGTTG	Mancabelli	Oscillospira	80% Study
1aa278b7c3be18d27131aeb66c9be5cb	TACGGGAGGCAGCAGTGGGGAATATTGGGCAATGGGCGCAAGCCTGACCCAGCAACGCCGCGTGAAGGAAGAAGGCTTTCGGGTTGTAAACTTCTTTTGTCGGGGACGAACAAATGACGGTACCTGACGA	Mancabelli	Oscillospira	80% Study
7f8eedec52d105256fb0871bc728ff22	TACGGGACGCAGCAGTGGGGAATATTGGGCAATGGGCGCAAGCCTGACCCAGCAACGCCGCGTGAAGGATGAAGGCCCTCGGGTTGTAAACTTCTTTTAACAGGGACGAATAAAGTGACGGTACCTGTTG	Mancabelli	Oscillospira	80% Study
81e8aafd1b437b7edbb6933e68e02fa0	TACGGGAGGCAGCAGTGGGGAATATTGGGCAATGGGCGCAAGCCTGACCCAGCAACGCCGCGTGAAGGAAGAAGGCTTTCGGGTTGTAAACTTCTTTTGTCAGGGAACAGTAGAAGAGGGTACCTGACGA	Mancabelli	Oscillospira	80% Study
abe8c19294c02cd5e15b79fc7924238d	TACGGGAGGCAGCAGTGGGGAATATTGGGCAATGGGCGCAAGCCTGACCCAGCAACGCCGCGTGAAGGATGAAGGCCCTCGGGTTGTAAACTTCTTTTAACAGGGACGAATAAAGTGACGGTACCTGTTG	Mancabelli	Oscillospira	80% Study
d3fff1688434a7c556c085396a0711c4	TACGGGAGGCAGCAGTGGGGAATATTGGGCAATGGGCGCAAGCCTGACCCAGCAACGCCGCGTGAAGGAAGAAGGCTTTCGGGTTGTAAACTTCTTTTGTCAGGGAAGAGCAGAAGACTGTACCTGACGA	Mancabelli	Oscillospira	80% Study
a6694d260249f34fbcb473797afee806	TACGGGGGGCAGCAGTGGGGAATATTGGGCAATGGGCGCAAGCCTGACCCAGCAACGCCGCGTGAAGGAAGAAGGCTTTCGGGTTGTAAACTTCTTTTGTCAGGGAACAGTAGAAGAGGGTACCTGACGA	Mancabelli	Oscillospira	80% Study
c989ad572478e429f36a0010d45459cb	TACGGGAGGCAGCAGTGGGGAATATTGGGCAATGGGCGCAAGCCTGACCCAGCAACGCCGCGTGAAGGAAGAAGGCTTTCGGGTTGTAAACTTCTTTTATCAGGGAAGATGAATGAGACTGTACCTGATG	Mancabelli	Oscillospira	80% Study
6b732c7efe6401ec4b623efb3573f888	TACGGGGGGCAGCAGTGGGGAATATTGGGCAATGGGCGCAAGCCTGACCCAGCAACGCCGCGTGAAGGAAGAAGGCTTTCGGGTTGTAAACTTCTTTTCTCAGGGACGAAACAAATGACGGTACCTGAGG	Mancabelli	Oscillospira	80% Study
4c14a9381c344d5850a7567d83491a93	TACGGGAGGCAGCAGTGGGGAATATTGGGCAATGGGCGCAAGCCTGACCCAGCAACGCCGCGTGAAGGATGAAGGCCCTCGGGTTGTAAACTTCTTTTAACAGGGACGAATTCTGACGGTACCTGTTGAA	Mancabelli	Oscillospira	80% Study
31373f2e57dd3063cfb2566a6ea63b28	TACGGGAGGCAGCAGTGGGGAATATTGGGCAATGGGGGCAACCCTGACCCAGCAACGCCGCGTGAAGGAAGAAGGCTTTCGGGTTGTAAACTTCTTTTACCAGGGACGAAGGACGTGACGGTACCTGGAG	Mancabelli	Oscillospira	80% Study
8300616824f0f6d68cbd5ef98d25631a	TACGGGAGGCAGCAGTGGGGAATATTGGGCAATGGGGGCAACCCTGACCCAGCAACGCCGCGTGAAGGAAGAAGGCTTTCGGGTTGTAAACTTCTTTTACCAGGGACGAAGACGTGACGGTACCTGGAGA	Mancabelli	Oscillospira	80% Study
5ac9d6d5c1fe222c05321fa3a5c03280	TACGGGGGGCAGCAGTGGGGAATATTGGGCAATGGGCGCAAGCCTGACCCAGCAACGCCGCGTGAAGGATGAAGGCCCTCGGGTTGTAAACTTCTTTTAACAGGGACGAATTCTGACGGTACCTGTTGAA	Mancabelli	Oscillospira	80% Study
c65595782d6edbe665cc532631a5d221	TACGGGAGGCAGCAGTGGGGAATATTGGGCAATGGGCGCAAGCCTGACCCAGCAACGCCGCGTGAAGGAAGAAGGCTTTCGGGTTGTAAACTTCTTTTCTCAGGGACGAAACAAATGACGGTACCTGAGG	Mancabelli	Oscillospira	80% Study
71c3e2135c889ffd6a8c2cead88f936c	TACGGGGGGCAGCAGTGGGGAATATTGGGCAATGGGCGCAAGCCTGACCCAGCAACGCCGCGTGAAGGATGAAGGCTTTCGGGTTGTAAACTTCTTTTATTCGGGACGAAGAAAATGACGGTACCGAATG	Mancabelli	Oscillospira	80% Study
5440efc9597143ad149f7ce3151435b5	TACGGGAGGCAGCAGTGGGGAATATTGGGCAATGGGCGCAAGCCTGACCCAGCAACGCCGCGTGAAGGAAGAAGGCTCTCGGGTTGTAAACTTCTTTTAAGAGGGACGAAACAAATGACGGTACCTCTTG	Mancabelli	Oscillospira	80% Study
b4b16537f03eca549c3db79ed8802071	TACGGGGCGCAGCAGTGGGGAATATTGGGCAATGGGGGCAACCCTGACCCAGCAACGCCGCGTGAAGGAAGAAGGCTTTCGGGTTGTAAACTTCTTTTACCAGGGACGAAGACGTGACGGTACCTGGAGA	Mancabelli	Oscillospira	80% Study
a941c7615c01c98843aedb9db129ee0b	TACGGGACGCAGCAGTGGGGAATATTGGGCAATGGGCGCAAGCCTGACCCAGCAACGCCGCGTGAAGGAAGAAGGCTCTCGGGTTGTAAACTTCTTTTAAGAGGGACGAAACAAATGACGGTACCTCTTG	Mancabelli	Oscillospira	80% Study
ae65c35cc95c4088eae45e5be0c92e2f	TACGGGGGGCAGCAGTGGGGAATATTGGGCAATGGGCGCAAGCCTGACCCAGCAACGCCGCGTGAAGGAAGAAGGCTTTCGGGTTGTAAACTTCTTTTGTCAGGGAAGAGCAGAAGACTGTACCTGACGA	Mancabelli	Oscillospira	80% Study
18907c545fb08b54f46ee9978da1cda1	AGGGGGGAATATTGGGCAATGGGCGCAAGCCTGACCCAGCAACGCCGCGTGAAGGAAGAAGGCTTTCGGGTTGTAAACTTCTTTTGTCAGGGACGAAGCAAGTGACGGTACCTGACGAATAAGCCACGGC	Mancabelli	Oscillospira	80% Study
f29d4ba48657ae212c01ec0768ea511f	AGTGGGGAATATTGGGCAATGGGCGCAAGCCTGACCCAGCAACGCCGCGTGAAGGAAGAAGGCTTTCGGGTTGTAAACTTCTTTTAAGAGGGAAGAGCAGAAGACTGTACCTCTAGAATAAGCCACGGCT	Mancabelli	Oscillospira	80% Study
759af3fc57ff0e5c4c1b373a8d37112b	AGGGGGGAATATTGGGCAATGGGCGCAAGCCTGACCCAGCAACGCCGCGTGAAGGAAGAAGGCTTTCGGGTTGTAAACTTCTTTTCTGAGGGACGAAGAAAGTGACGGTACCTCAGGAATAAGCCACGGC	Mancabelli	Oscillospira	80% Study
f92c94b0b2f9620881722d5c5d6554d7	AGTGGGGAATATTGGGCAATGGGCGCAAGCCTGACCCAGCAACGCCGCGTGAAGGAAGAAGGCTTTCGGGTTGTAAACTTCTTTTATCAGGGACGAAGCAAGTGACGGTACCTGATGAATAAGCCACGGC	Mancabelli	Oscillospira	80% Study
12351250e9b196e1ab2254e34afccb1a	AGGGGGGGAATATTGGGCAATGGGCGCAAGCCTGACCCAGCAACGCCGCGTGAAGGAAGAAGGCTTTCGGGTTGTAAACTTCTTTTATTCGGGACGAAGAAATGACGGTACCGAATGAATAAGCCACGGC	Mancabelli	Oscillospira	80% Study
5481a7288bb800b234ab3abc449f02c7	AGTGGGGAATATTGGGCAATGGGCGCAAGCCTGACCCAGCAACGCCGCGTGAAGGAAGAAGGCTCTCGGGTTGTAAACTTCTTTTAAGAGGGACGAAAAAAATGACGGTACCTCTTGAATAAGCCACGGC	Mancabelli	Oscillospira	80% Study
03c6f6450b97cc723637253b4ac218af	AGCGGGGAATATTGGGCAATGGGCGCAAGCCTGACCCAGCAACGCCGCGTGAAGGATGAAGGCTTTCGGGTTGTAAACTTCTTTTATTCGGGACGAAACAAATGACGGTACCGAATGAATAAGCCACGGC	Mancabelli	Oscillospira	80% Study
2687a4ca41016c6501afd92b33cfc25e	AGCGGGGAATATTGGGCAATGGGCGCAAGCCTGACCCAGCAACGCCGCGTGAAGGAAGAAGGCTTTCGGGTTGTAAACTTCTTTTGTCAGGGAAGAGCAGAAGACGGTACCTGACGAATAAGCCACGGCT	Mancabelli	Oscillospira	80% Study
07790647a063f47093d320fed8a851d3	AGTGGGGAATATTGGGCAATGGGCGCAAGCCTGACCCAGCAACGCCGCGTGAAGGAAGAAGGCCTTCGGGTTGTAAACTTCTTTTCTTAGGGACGAAGAAAATGACGGTACCTAAGGAATAAGCCACGGC	Mancabelli	Oscillospira	80% Study
47acbee15e80decc619da06edbdbd42a	AGGGGGGGAATATTGGGCAATGGGCGCAAGCCTGACCCAGCAACGCCGCGTGAAGGAAGAAGGCTTTCGGGTTGTAAACTTCTTTTCTCAGGGACGAAACAAATGACGGTACCTGAGGAATAAGCCACGG	Mancabelli	Oscillospira	80% Study
49262d1c5a4618ff3b40ab562c1883e1	AGGGGGGGAATATTGGGCAATGGGCGCAAGCCTGACCCAGCAACGCCGCGTGAAGGAAGAAGGCTTTCGGGTTGTAAACTTCTTTTCTCAGGGACGAAGCAAGTGACGGTACCTGAGGAATAAGCCACGG	Mancabelli	Oscillospira	80% Study
3821edf9b9d77bd473ca767a7f125457	AGTGGGGAATATTGGGCAATGGGCGCAAGCCTGACCCAGCAACGCCGCGTGAAGGATGAAGGCTTTCGGGTTGTAAACTTCTTTTATTCGGGATGAAACAAATGACGGTACCGAATGAATAAGCCACGGC	Mancabelli	Oscillospira	80% Study
e955640e96996025962d0b3d427d004e	AGGGGGGGAATATTGGGCAATGGGCGCAAGCCTGACCCAGCAACGCCGCGTGAAGGAAGAAGGCTTTCGGGTTGTAAACTTCTTTTGTCAGGGACGAAGGACGTGACGGTACCTGACGAATAAGCCACGG	Mancabelli	Oscillospira	80% Study
4aa9aaeccbcb7fe9f82fe2a2ff13c0eb	AGTGGGGAATATTGGGCAATGGGCGCAAGCCTGACCCAGCAACGCCGCGTGAAGGAAGAAGGCTTTCGGGTTGTAAACTTCTTTTCTCAGGGACGAAGAAAGTGACGGTACCTGAGGAACAAGCCACGGC	Mancabelli	Oscillospira	80% Study
7f11bdc119f13b0204776778eca6ab9f	TACGGGGCGCAGCAGTGGGGAATATTGGGCAATGGGCGCAAGCCTGACCCAGCAACGCCGCGTGAAGGAAGAAGGCTTTCGGGTTGTAAACTTCTTTTCTCAGGGACGAAGAAAATGACGGTACCTGAGG	Mancabelli	Oscillospira	80% Study
d4833a5b513e2135e0720b66ccf47c93	TACGGGAGGCAGCAGTGGGGAATATTGGGCAATGGGCGCAAGCCTGACCCAGCAACGCCGCGTGAAGGAAGAAGGCTTTCGGGTTGTAAACTTCTTTTCTCAGGGACGAAGAAAATGACGGTACCTGAGG	Mancabelli	Oscillospira	80% Study
a6e04a5896eb95dccf26141369e361f4	TACGGGGGGGCAGCAGTGGGGAATATTGGGCAATGGGCGCAAGCCTGACCCAGCAACGCCGCGTGAAGGATGAAGGCCCTCGGGTTGTAAACTTCTTTTAACAGGGACGAATAAAGTGACGGTACCTGTT	Mancabelli	Oscillospira	80% Study
44ff73c9f6987a1211095345f22c21a5	TACGGGGGGCAGCAGTGGGGAATATTGGGCAATGGGCGAAAGCCTGACCCAGCAACGCCGCGTGAAGGAAGAAGGCTTTCGGGTTGTAAACTTCTTTTATCAGGGACGAAGGATGTGACGGTACCTGATG	Mancabelli	Oscillospira	80% Study
57ffc40c185085691682e8ec1dd83c52	ACGGGACGCAGCAGTGGGGAATATTGGGCAATGGGCGCAAGCCTGACCCAGCAACGCCGCGTGAAGGATGAAGGCCCTCGGGTTGTAAACTTCTTTTAACAGGGACGAATAAAGTGACGGTACCTGTTGA	Mancabelli	Oscillospira	80% Study
d4d815402ac598a54a9c7e7599f15ea9	ACGGGGGCAGCAGTGGGGAATATTGGGCAATGGGCGCAAGCCTGACCCAGCAACGCCGCGTGAAGGATGAAGGCCCTCGGGTTGTAAACTTCTTTTAACAGGGACGAATAAAGTGACGGTACCTGTTGAA	Mancabelli	Oscillospira	80% Study
236d43b56b99a29bc82ea4a7f34990cb	ACGGGAGGCAGCAGTGGGGAATATTGGGCAATGGGCGCAAGCCTGACCCAGCAACGCCGCGTGAAGGATGAAGGCCCTCGGGTTGTAAACTTCTTTTAACAGGGACGAATAAAGTGACGGTACCTGTTGA	Mancabelli	Oscillospira	80% Study
472493ddb44fc1edb1e8d3d1934765e6	ACGGGGCAGCAGTGGGGAATATTGGGCAATGGGCGCAAGCCTGACCCAGCAACGCCGCGTGAAGGATGAAGGCCCTCGGGTTGTAAACTTCTTTTAACAGGGACGAATAAAGTGACGGTACCTGTTGAAT	Mancabelli	Oscillospira	80% Study
93c9d30a194c701e9f595f3a4983db46	TACGGGGCGCAGCAGTGGGGAATATTGGGCAATGGGCGCAAGCCTGACCCAGCAACGCCGCGTGAAGGATGAAGGCCCTCGGGTTGTAAACTTCTTTTTAACAGGGACGAATAAAGTGACGGTACCTGTT	Mancabelli	Oscillospira	80% Study
b7974bd8b73b315c5b24dbd60a8952ca	ACGGGGGGCAGCAGTGGGGAATATTGGGCAATGGGCGCAAGCCTGACCCAGCAACGCCGCGTGAAGGATGAAGGCCCTCGGGTTGTAAACTTCTTTTTAACAGGGACGAATAAAGTGACGGTACCTGTTG	Mancabelli	Oscillospira	80% Study
5d749ef6520ba871a58657ca1ce2d37e	AGTGGGGAATATTGGGCAATGGGCGCAAGCCTGACCCAGCAACGCCGCGTGAAGGATGAAGGCTTTCGGGTTGTAAACTTCTTTTATCAGGGACGAACAAATGACGGTACCTGATGAATAAGCCACGGCT	Mancabelli	Oscillospira	80% Study
a0e876e82bead4ef1a643e202f3d3097	AGTGGGGAATATTGGGCAATGGGCGCAAGCCTGACCCAGCAACGCCGCGTGAAGGATGAAGGCTCTCGGGTTGTAAACTTCTTTTATTCAGGACGAACAAAATGACGGTACTGAATGAATAAGCCACGGC	Mancabelli	Oscillospira	80% Study
e6319e683ef6de6f05379675e98793fc	AGTGGGGAATATTGGGCAATGGGCGCAAGCCTGACCCAGCAACGCCGCGTGAAGGAAGAAGGCTCTCGGGTTGTAAACTTCTTTTAAGAGGGACGAAACAAATGACGGTACCCCTTGAATAAGCCACGGC	Mancabelli	Oscillospira	80% Study
cd6eb2ac873035af1485c579b2cbcf2b	AGTGGGGAATATTGGGCAATGGGCGCAAGCCTGACCCAGCAACGCCGCGTGAAGGATGAAGGCCCTCGGGTTGTAAACTTCTTTTATTCAGGACGAACAAAAATGACGGTACTGAATGAATAAGCCACGG	Mancabelli	Oscillospira	80% Study
6d5c356a63a711901cfefd938bb60ea1	AGTGGGGAATATTGGGCAATGGGCGCAAGCCTGACCCAGCAACGCCGCGTGAAGGATGAAGGCTTTCGGGTTGTAAACTTCTTTTAACAGGGACGAATGAAGTGACGGTACCTGTTGAATAAGCCACGGC	Mancabelli	Oscillospira	80% Study
9a4322debde9963f3c87a79e1039bb68	AGTGGGGAATATTGGGCAATGGGCGCAAGCCTGACCCAGCAACGCCGCGTGAAGGAAGAAGGCTTTCGGGTTGTAAACTTCTTTTGTCAGGGAAGAGTAGAAGACGGTACCTGACGAATAAGCTCCGGCT	Mancabelli	Oscillospira	80% Study
16f84a4f2c51d89569490585fe78f4db	AGTGGGGAATATTGGGCAATGGGCGCAAGCCTGACCCAGCAACGCCGCGTGAAGGAAGAAGGCTTTCGGGTTGTAAACTTCTTTTATCAGAGACGAAGGAATGACGGTACCTGATGAATAAGCCACGGCT	Mancabelli	Oscillospira	80% Study
c0b3ae008e887d706f6ff1436a0a2c2a	AGTGGGGAATATTGGGCAATGGGCGCAAGCCTGACCCAGCAACGCCGCGTGAAGGAAGAAGGCTTTCTGGTTGTAAACTTCTTTTCTCAGGGACGAAACAAATGACGGTACCTGAGGAATAAGCCACGGC	Mancabelli	Oscillospira	80% Study
0533c1ac4fc380925a6db6a2916ac246	AGTGGGGAATATTGGGCAATGGGCGCAAGCCTGACCCAGCAACGCCGCGTGAAGGAAGAAGGCTTTCGGGTTGTAAACTTCTTTTATCGGGGACGAAGAAATGACGGTACCTGATGAATAAGCCACGGCT	Mancabelli	Oscillospira	80% Study
b50852ac24b4d3f14fbd096a351bf028	TACGGGGGGCAGCAGTGGGGAATATTGGGCAATGGGCGCAAGCCTGACCCAGCAACGCCGCGTGAAGGAAGAAGGCTCTCGGGTTGTAAACTTCTTTTAAGAGGGACGAAACAAATGACGGTACCTCTTG	Mancabelli	Oscillospira	80% Study
994f7416e42b4432f32a7e50e5d55786	TACGGGGGGCAGCAGTGGGGAATATTGGGCAATGGGCGCAAGCCTGACCCAGCAACGCCGCGTGAAGGATGAAGGCTTTCGGGTTGTAAACTTCTTTTATTCGGGACGAAACAAATGACGGTACCGAATG	Mancabelli	Oscillospira	80% Study
65da076f1ba4fbdf23608dbb29b451e4	AGTGGGGAATATTGGGCAATGGGCGCAAGCTTGACCCAGCAACGCCGCGTGAAGGATGAAGGCTTTCGGGTTGTAAACTTCTTTTATCAGGGACGAAACAAATGACGGTACCTGATGAATAAGCCACGGC	Mancabelli	Oscillospira	80% Study
0ad189dab05183645d9542650688f998	TACGGGGGGCAGCAGTGGGGAATATTGGGCAATGGGCGCAAGCCTGACCCAGCAACGCCGCGTGAAGGAAGAAGGCTTTCGGGTTGTAAACTTCTTTTCTCAGGGACGAAGGAAGTGACGGTACCTGAGG	Mancabelli	Oscillospira	80% Study
a89a01cd51249ce22bf1d607836c32b3	TACGGGAGGCAGCAGTGGGGAATATTGGGCAATGGGCGCAAGCCTGACCCAGCAACGCCGCGTGAAGGAAGAAGGCTTTCGGGTTGTAAACTTCTTTTCTCAGGGACGAAGGAAGTGACGGTACCTGAGG	Mancabelli	Oscillospira	80% Study
29e7505e2394200ab6f0757a6f243ece	AGGGGGGGAATATTGGGCAATGGGCGCAAGCCTGACCCAGCAACGCCGCGTGAAGGAAGAAGGCTTTCGGGTTGTAAACTTCTTTTGTCAGGGAAGAGCAGAAGACGGTACCTGACGAATAAGCCACGGC	Mancabelli	Oscillospira	80% Study
f54b0d208b3f8f983b300d4861621b5d	TACGGGAGGCAGCAGTGGGGAATATTGGGCAATGGGCGCAAGCCTGACCCAGCAACGCCGCGTGAAGGATGAAGGCTTTCGGGTTGTAAACTTCTTTTATTCGGGACGAAACAAATGACGGTACCGAATG	Mancabelli	Oscillospira	80% Study
6ac4ed3f01b42336c9716261c5a84c97	TACGGGGCGCAGCAGTGGGGAATATTGGGCAATGGGCGCAAGCCTGACCCAGCAACGCCGCGTGAAGGATGAAGGCTTTCGGGTTGTAAACTTCTTTTATTCGGGACGAAACAAATGACGGTACCGAATG	Mancabelli	Oscillospira	80% Study
e9c928be36ebfbf05fb57def0bce2d50	TACGGGACGCAGCAGGGGGGAATATTGGGCAATGGGCGCAAGCCTGACCCAGCAACGCCGCGTGAAGGAAGAAGGCTTTCGGGTTGTAAACTTCTTTTAACAGGGAAGAGCAGAAGACGGTACCTGTTGA	Mancabelli	Oscillospira	80% Study
a35bb29e6f799c6aa766c6ad4c777dba	AGTGAGGAATATTGGTCAATGGACGAGAGTCTGAACCAGCCAAGTAGCGTGAAGGATGACTGCCCTATGGGTTGTAAACTTCTTTTATACGGGAATAAAGTGAGGCACGTGTGCCTTTTTGTATGTACCG	Mancabelli	Bacteroides	80% Study
509291c501e554413023f76deb8dc549	AGGGAGGAATATTGGTCAATGGACGAGAGTCTGAACCAGCCAAGTAGCGTGAAGGATGACTGCCCTATGGGTTGTAAACTTCTTTTATACGGGAATAAAGTGAGGCACGTGTGCCTTTTTGTATGTACCG	Mancabelli	Bacteroides	80% Study
8f29d15602a50a1b8735b2b578d75f08	AGGGAGGAATATTGGTCAATGGGCGCAGGCCTGAACCAGCCAAGTAGCGTGAAGGATGACTGCCCTATGGGTTGTAAACTTCTTTTATATGGGAATAAAGTTTTCCACGTGTGGAATTTTGTATGTACCA	Mancabelli	Bacteroides	80% Study
d73182a4d8e589cd1ef9e6af3ef779d9	AGGGAGGAATATTGGTCAATGGGCGAGAGCCTGAACCAGCCAAGTAGCGTGAAGGATGACTGCCCTATGGGTTGTAAACTTCTTTTATAAAGGAATAAAGTCGGGTATGGATACCCGTTTGCATGTACTT	Mancabelli	Bacteroides	80% Study
42c486d3df22f06f6a9d3362744e298f	AGTGAGGAATATTGGTCAATGGGCGAGAGCCTGAACCAGCCAAGTAGCGTGAAGGATGACTGCCCTATGGGTTGTAAACTTCTTTTATAAAGGAATAAAGTCGGGTATGCATACCCGTTTGCATGTACTT	Mancabelli	Bacteroides	80% Study
54e24a91b69512d6f9dc5c334301de24	AGTGAGGAATATTGGTCAATGGGCGATGGCCTGAACCAGCCAAGTAGCGTGAAGGATGACTGCCCTATGGGTTGTAAACTTCTTTTATAAAGGAATAAAGTCGGGTATGCATACCCGTTTGCATGTACTT	Mancabelli	Bacteroides	80% Study
12fdb63017f80b9faff4272b5ede23ae	AGGGAGGAATATTGGTCAATGGACGAGAGTCTGAACCAGCCAAGTAGCGTGAAGGATGACTGCCCTATGGGTTGTAAACTTCTTTTATATGGGAATAAAGTATTCCACGTGTGGAATTTTGTATGTACCA	Mancabelli	Bacteroides	80% Study
edfe5646755aee23b5860e3c3d6e7b5e	AGTGAGGAATATTGGTCAATGGGCGAGAGCCTGAACCAGCCAAGTAGCGTGAAGGATGACTGCCCTATGGGTTGTAAACTTCTTTTATAAAGGAATAAAGTCGGTATGCATACCCGTTTGCATGTACTTT	Mancabelli	Bacteroides	80% Study
04744d3b29a779e0a3931c1d4424d1e4	AGTGAGGAATATTGGTCAATGGGCGCAGGCCTGAACCAGCCAAGTAGCGTGAAGGATGACTGCCCTATGGGTTGTAAACTTCTTTTATATGGGAATAAAGTTTTCCACGTGTGGAATTTTGTATGTACCA	Mancabelli	Bacteroides	80% Study
818ee252faf4c93bbc58f2fdc2d3a333	AGTGAGGAATATTGGTCAATGGGCGAGAGCCTGAACCAGCCAAGTAGCGTGAAGGATGAAGGCTCTATGGGTCGTAAACTTCTTTTATATGGGAATAAAGTTTTCCACGTGTGGAATTTTGTATGTACCA	Mancabelli	Bacteroides	80% Study
cddac42a905fe9ae68ef7e30be9ffb19	AGGGAGGAATATTGGTCAATGGGCGATGGCCTGAACCAGCCAAGTAGCGTGAAGGATGACTGCCCTATGGGTTGTAAACTTCTTTTATAAAGGAATAAAGTCGGTATGCATACCCGTTTGCATGTACTTT	Mancabelli	Bacteroides	80% Study
613e0ffbf74f9f69c4c390cedad49583	AGGGAGGAATATTGGTCAATGGGCGAGAGCCTGAACCAGCCAAGTAGCGTGAAGGATGACTGCCCTATGGGTTGTAAACTTCTTTTATAAAGGAATAAAGTCGGTATGCATACCCGTTTGCATGTACTTT	Mancabelli	Bacteroides	80% Study
5183b4083b7a6bb063477e1c98a24342	AGTGAGGAATATTGGTCAATGGGCGAGAGCCTGAACCAGCCAAGTAGCGTGAAGGATGACTGCCCTATGGGTTGTAAACTTCTTTTATAAAGGAATAAAGTCGGGTATGGATACCCGTTTGCATGTACTT	Mancabelli	Bacteroides	80% Study
82b0422823609ab1a9fb27cf8c3f6ed4	AGGGAGGAATATTGGTCAATGGGCGAGAGCCTGAACCAGCCAAGTAGCGTGAAGGATGACTGCCCTATGGGTTGTAAACTTCTTTTATAAAGGAATAAAGTCGGGTATGCATACCCGTTTGCATGTACTT	Mancabelli	Bacteroides	80% Study
9a45a398799a9125cec0a2e2afdbcb63	AGTGAGGAATATTGGTCAATGGACGAGAGTCTGAACCAGCCAAGTAGCGTGAAGGATGAAGGTTCTATGGATTGTAAACTTCTTTTATACGGGAATAAACGAATCCACGTGTGGATTTTTGCATGTACCG	Mancabelli	Bacteroides	80% Study
a388e715a30256257a92dc0327318321	AGTGAGGAATATTGGTCAATGGGCGATGGCCTGAACCAGCCAAGTAGCGTGAAGGATGACTGCCCTATGGGTTGTAAACTTCTTTTATAAAGGAATAAAGTCGGTATGCATACCCGTTTGCATGTACTTT	Mancabelli	Bacteroides	80% Study
7a46b7347e53fef20af8e757439554c3	GTGAGGAATATTGGTCAATGGACGAGAGTCTGAACCAGCCAAGTAGCGTGAAGGATGACTGCCCTATGGGTTGTAAACTTCTTTTATACGGGAATAAAGTGAGGCACGTGTGCCTTTTTGTATGTACCGT	Mancabelli	Bacteroides	80% Study
3cf564aad45e2b14254380bad98e08fd	AGGGAGGAATATTGGTCAATGGGCGATGGCCTGAACCAGCCAAGTAGCGTGAAGGATGACTGCCCTATGGGTTGTAAACTTCTTTTATAAAGGAATAAAGTCGGGTATGCATACCCGTTTGCATGTACTT	Mancabelli	Bacteroides	80% Study
91ec3141eb669bf6d445e7cde53e77a7	AGTGAGGAATATTGGTCAATGGACGAGAGTCTGAACCAGCCAAGTAGCGTGAAGGATGACTGCCCTATGGGTTGTAAACTTCTTTTATATGGGAATAAAATGTTTCACGTGTGGGATTTTGTATGTACCA	Mancabelli	Bacteroides	80% Study
299eddade494a9499e322459f7239f33	AGTGAGGAATATTGGTCAATGGACGAGAGTCTGAACCAGCCAAGTAGCGTGAAGGATGACTGCCCTATGGGTTGTAAACTTCTTTTATACGGGAATAAAGTTAGCCACGTGTGGTTTTTTGCATGTACCG	Mancabelli	Bacteroides	80% Study
4067aee1a9c2444aef0295e390ca02b9	AGTGAGGAATATTGGTCAATGGACGAGAGTCTGAACCAGCCAAGTAGCGTGAAGGATGACTGCCCTATGGGTTGTAAACTTCTTTTATATGGGAATAAAGTATTCCACGTGTGGGATTTTGTATGTACCA	Mancabelli	Bacteroides	80% Study
6982b014146a5892d8d865f3cd5e11a1	AGTGAGGAATATTGGTCAATGGGCGCTAGCCTGAACCAGCCAAGTAGCGTGAAGGATGAAGGCTCTATGGGTCGTAAACTTCTTTTATATAAGAATAAAGTGCAGTATGTATACTGTTTTGTATGTATTA	Mancabelli	Bacteroides	80% Study
40c380754f7901213190f16f2a9f5667	AGTGAGGAATATTGGTCAATGGACGAGAGTCTGAACCAGCCAAGTAGCGTGAAGGATGACTGCCCTATGGGTTGTAAACTTCTTTTATACGGGAATAAAGTGAGGCACGTGTGCCTTTTGTATGTACCGT	Mancabelli	Bacteroides	80% Study
82ef454d8e2a95c0caaa09d2cceab435	AGTGAGGAATATTGGTCAATGGGCGCGAGCCTGAACCAGCCAAGTAGCGTGAAGGATGAAGGCTCTATGGGTCGTAAACTTCTTTTATATGGGAATAAAGTTTTCCACGTGTGGAATTTTGTATGTACCA	Mancabelli	Bacteroides	80% Study
664cc369751d0186d9f020e40b60c062	AGTGAGGAATATTGGTCAATGGGCGATGGCCTGAACCAGCCAAGTAGCGTGAAGGATGACTGCCCTATGGGTTGTAAACTTCTTTTATAAAGGAATAAAGTCGTATGCATACCCGTTTGCATGTACTTTA	Mancabelli	Bacteroides	80% Study
907acb0cfbf16fe6585e7ecfb495535e	AGTGAGGAATATTGGTCAATGGACGAGAGTCTGAACCAGCCAAGTAGCGTGAAGGATGACTGCCCTATGGGTTGTAAACTTCTTTTATATGGGAATAAAGTATTCCACGTGTGGAATTTTGTATGTACCA	Mancabelli	Bacteroides	80% Study
61b7aef2066e6fe30f18ddb51be7b669	AGTGAGGAATATTGGTCAATGGACGAGAGTCTGAACCAGCCAAGTAGCGTGAAGGATGACTGCCCTATGGGTTGTAAACTTCTTTTATATGGGAATAAAGTTTTCCACGTGTGGAATTTTGTATGTACCA	Mancabelli	Bacteroides	80% Study
fd327fe560a173280b3ba9f303b6221c	AGTGAGGAATATTGGTCAATGGGCGCGAGCCTGAACCAGCCAAGTAGCGTGAAGGATGACTGCCCTATGGGTTGTAAACTTCTTTTATACGGGAATAAAGTCACTTACGTGTAAGTGTTTGTATGTACCT	Mancabelli	Bacteroides	80% Study
7073c37466711ceef0b5ca5fbb082c11	AGTGAGGAATATTGGTCAATGGACGAGAGTCTGAACCAGCCAAGTAGCGTGAAGGATGAAGGTCCTACGGATTGTAAACTTCTTTTATAAGGGAATAAACCCTCCCACGTGTGGGAGCTTGTATGTACCT	Mancabelli	Bacteroides	80% Study
d434ec6c604b291c0c80f8380e81e14b	AGGGAGGAATATTGGTCAATGGACGAGAGTCTGAACCAGCCAAGTAGCGTGAAGGATGACTGCCCTATGGGTTGTAAACTTCTTTTATATGGGAATAAAGTATTCCACGTGTGGGATTTTGTATGTACCA	Mancabelli	Bacteroides	80% Study
e2393f61096732d34716345db1a10ce6	AGGGAGGAATATTGGTCAATGGGCGAGAGCCTGAACCAGCCAAGTAGCGTGAAGGATGACTGCCCTATGGGTTGTAAACTTCTTTTATACGGGAATAAAGTGAGGCACGTGTGCCTTTTTGTATGTACCG	Mancabelli	Bacteroides	80% Study
137d63d2ced1de876e519f183f4dee1e	AGGGAGGAATATTGGTCAATGGACGAGAGTCTGAACCAGCCAAGTAGCGTGAAGGATGACTGCCCTATGGGTTGTAAACTTCTTTTATAAAGGAATAAAGTCGGGTATGGATACCCGTTTGCATGTACTT	Mancabelli	Bacteroides	80% Study
ee3a2bf91a214d0919ee082b8ae42c2b	AGTGAGGAATATTGGTCAATGGACGAGAGTCTGAACCAGCCAAGTAGCGTGAAGGATGACTGCCCTATGGGTTGTAAACTTCTTTTATAAGGGAATAAAGTCAGGTACGCGTACCTGTTTGCATGTACCT	Mancabelli	Bacteroides	80% Study
d61913667ba9463884c06bdb15682024	AGTGAGGAATATTGGTCAATGGGCGAGAGCCTGAACCAGCCAAGTAGCGTGAAGGATGAAGGCTCTATGGGTCGTAAACTTCTTTTATATGGGAATAAAGTATTCCACGTGTGGAATTTTGTATGTACCA	Mancabelli	Bacteroides	80% Study
32925c948fbde7c79f4c8503d14070f9	AGTGAGGAATATTGGTCAATGGGCGAGAGCCTGAACCAGCCAAGTAGCGTGAAGGATGACTGCCCTATGGGTTGTAAACTTCTTTTATACGGGAATAACATCATCCACGTGTGGGTGTCTGCATGTACCG	Mancabelli	Bacteroides	80% Study
8b32ac040b0a271637057a56d4b48e4f	GTGAGGAATATTGGTCAATGGACGAGAGTCTGAACCAGCCAAGTAGCGTGAAGGATGAAGGTCCTACGGATTGTAAACTTCTTTTATAAGGGAATAAACCCTCCCACGTGTGGGAGCTTGTATGTACCTT	Mancabelli	Bacteroides	80% Study
eb4d40a5aa6c9ca4ef2a23aad88e4e3c	AGTGAGGAATATTGGTCAATGGGCGCTAGCCTGAACCAGCCAAGTAGCGTGAAGGATGACTGCCCTATGGGTTGTAAACTTCTTTTATATGGGAATAAAGTGCAGTATGTATACTGCTTTGCATGTACCT	Mancabelli	Bacteroides	80% Study
24b9d35f34a38ace19b96d3fdb44e045	AGTGAGGAATATTGGTCAATGGGCGAGAGCCTGAACCAGCCAAGTAGCGTGAAGGATGACTGCCCTACGGGTTGTAAACTTCTTTTATAAGGGAATAAAGTTCTCTACGTGTAGAGTTTTGTATGTACCT	Mancabelli	Bacteroides	80% Study
52294fa69080f058d843357592fdf7b1	AGTGAGGAATATTGGTCAATGGGCGAGAGCCTGAACCAGCCAAGTAGCGTGAAGGATGACTGCCCTATGGGTTGTAAACTTCTTTTATACGGGAATAACAAGCGGCACGTGTGCCGCTCTGCATGTACCG	Mancabelli	Bacteroides	80% Study
4bc309128b8aa441db71214f492c6cf3	AGTGAGGAATATTGGTCAATGGACGCAAGTCTGAACCAGCCAAGTAGCGTGAAGGATGACCGCCCTATGGGTTGTAAACTTCTTTTATAAGGGAATAAATTGAGGTACGCGTACCTTTTTGTATGTACCT	Mancabelli	Bacteroides	80% Study
95ba19d32e729d0abdbf1e95598666b0	AGTGAGGAATATTGGTCAATGGACGAGAGTCTGAACCAGCCAAGTAGCGTGAAGGATGACTGCCCTATGGGTTGTAAACTTCTTTTATATGGGAATAAAAAAGGCCACGTGTGGCCTATTGTATGTACCT	Mancabelli	Bacteroides	80% Study
84611fc30f52edb37b69d6a98694f24a	AGTGAGGAATATTGGTCAATGGACGAGAGTCTGAACCAGCCAAGTAGCGTGAAGGATGACTGCCCTATGGGTTGTAAACTTCTTTTATATGGGAATAAAACAGGGTATGCATACCCTCTTGTATGTACCA	Mancabelli	Bacteroides	80% Study
82fb605c6fbbebb0542b069154f32842	AGTGAGGAATATTGGTCAATGGGCGAGAGCCTGAACCAGCCAAGTAGCGTGAAGGAAGACTGCCCTATGGGTTGTAAACTTCTTTTATACGGGAATAAAGTCATCCACGTGTGGATGTTTGTATGTACCG	Mancabelli	Bacteroides	80% Study
3c1c09924b27a1eafcbb7661cf9c0b54	AGTGAGGAATATTGGTCAATGGACGAGAGTCTGAACCAGCCAAGTAGCGTGAAGGACGACTGCCCTATGGGTTGTAAACTTCTTTTATATGGGAATAAAAAAGTCCACGTGTGGATTCTTGTATGTACCA	Mancabelli	Bacteroides	80% Study
7d6c3e8ecd1718dd89d691bb2a67e558	AGTGAGGAATATTGGTCAATGGGCGCGAGCCTGAACCAGCCAAGTAGCGTGAAGGATGACTGCCCTATGGGTTGTAAACTTCTTTTATACGGGAATAAAGTCCGGCACGTGTGCCGGTTTGCATGTACCG	Mancabelli	Bacteroides	80% Study
4dff7f665f9ea8894afce84f47a0530a	AGGGAGGAATATTGGTCAATGGGCGCTAGCCTGAACCAGCCAAGTAGCGTGAAGGATGACTGCCCTATGGGTTGTAAACTTCTTTTATATGGGAATAAAGTGCAGTATGTATACTGCTTTGCATGTACCT	Mancabelli	Bacteroides	80% Study
e105409ee59f5e1db29abcc9eb45e0d6	AGTGAGGAATATTGGTCAATGGGCGAGAGCCTGAACCAGCCAAGTAGCGTGAAGGATGACGGCCCTACGGGTTGTAAACTTCTTTTGTGCGGGAATAAAGGAGCCTACGTGTAGGCTTTTGCATGTACCG	Mancabelli	Bacteroides	80% Study
35091e5e6bdce30e29afc44691c95faa	AGTGAGGAATATTGGTCAATGGACGAGAGTCTGAACCAGCCAAGTAGCGTGAAGGATGACTGCCCTATGGGTTGTAAACTTCTTTTATACGGGAATAAAGTTAGCCACGTGTGGCTTTTTGTATGTACCG	Mancabelli	Bacteroides	80% Study
c55aa3c3d6d24f34ef5329a2c53983cd	AGTGAGGAATATTGGTCAATGGGCGAGAGCCTGAACCAGCCAAGTAGCGTGAAGGATGACTGCCCTATGGGTTGTAAACTTCTTTTATACGGGAATAACACGCGGCACGTGTGCCGCTCTGCATGTACCG	Mancabelli	Bacteroides	80% Study
1cbf64028fe311d0b7a8fd8fff4f0c40	AGTGAGGAATATTGGTCAATGGACGAGAGTCTGAACCAGCCAAGTAGCGTGAAGGATGAAGGTCCTACGGATTGTAAACTTCTTTTATAAGGGAATAAAACCTCCCACGTGTGGGAGCTTGTATGTACCT	Mancabelli	Bacteroides	80% Study
ddb8354b6185015271e85f36eac95b5a	AGTGAGGAATATTGGTCAATGGACGAGAGTCTGAACCAGCCAAGTAGCGTGAAGGATGACTGCCCTATGGGTTGTAAACTTCTTTTATATGGGAATAAAAAAGGCCACGTGTGGCCTGTTGTATGTACCT	Mancabelli	Bacteroides	80% Study
2afab0bfa6b0c7306c659110d54aa09d	AGTGAGGAATATTGGTCAATGGACGAGAGTCTGAACCAGCCAAGTAGCGTGAAGGATGACTGCCCTATGGGTTGTAAACTTCTTTTATATGGGAATAAAACGTTCCACGTGTGGAATTTTGTATGTACCA	Mancabelli	Bacteroides	80% Study
1569e2faca995cb364cdbda8dc0999dd	AGTGAGGAATATTGGTCAATGGACGAGAGTCTGAACCAGCCAAGTAGCGTGAAGGATGACTGCCCTATGGGTTGTAAACTTCTTTTATAAGGGAATAAAGTGTGCCACGTGTGGTGTTTTGTATGTACCT	Mancabelli	Bacteroides	80% Study
6005b507c8a44a0a60d0595df1f9f687	AGTGAGGAATATTGGTCAATGGACGAGAGTCTGAACCAGCCAAGTAGCGTGAAGGATGACTGCCCTATGGGTTGTAAACTTCTTTTATACGGGAATAAAGTGGAGTATGCATACTCCTTTGTATGTACCG	Mancabelli	Bacteroides	80% Study
9d9f07e3ce1d62b22d9c838ce36ee769	AGTGAGGAATATTGGTCAATGGGCGAGAGCCTGAACCAGCCAAGTAGCGTGAAGGATGAAGGTCCTACGGATTGTAAACTTCTTTTATACGGGAATAAAGTATCCTACGTGTAGGATTTTGTATGTACCG	Mancabelli	Bacteroides	80% Study
4bcb222e25cbc7cffa6f9283a3c5d543	AGTGAGGAATATTGGTCAATGGGCGTTAGCCTGAACCAGCCAAGTAGCGTGAAGGATGAAGGCTCTATGGGTCGTAAACTTCTTTTATATAAGAATAAAGTGCAGTATGTATACTGTTTTGTATGTATTA	Mancabelli	Bacteroides	80% Study
be85fb1629eb3046995d71328fbc04c4	AGTGAGGAATATTGGTCAATGGACGAGAGTCTGAACCAGCCAAGTAGCGTGAAGGATGAAGGTTCTATGGATTGTAAACTTCTTTTATACGGGAATAAACGGATCCACGTGTGGATTTTTGCATGTACCG	Mancabelli	Bacteroides	80% Study
dc57372d86fd12f19e35c5b97ba7c304	GTGAGGAATATTGGTCAATGGGCGATGGCCTGAACCAGCCAAGTAGCGTGAAGGATGACTGCCCTATGGGTTGTAAACTTCTTTTATAAAGGAATAAAGTCGGGTATGCATACCCGTTTGCATGTACTTT	Mancabelli	Bacteroides	80% Study
701ae7b689ca1b8b71ec4f73a9c0febc	AGTGAGGAATATTGGTCAATGGGCGAGAGCCTGAACCAGCCAAGTAGCGTGAAGGATGACGGCCCTACGGGTTGTAAACTTCTTTTGTGCGGGAATAAAGGAGCCTACGTGTAGGTTTTTGCATGTACCG	Mancabelli	Bacteroides	80% Study
be6ee401e3d261594d7b8284710abcc6	AGTGAGGAATATTGGTCAATGGGCGAGAGCCTGAACCAGCCAAGTAGCGTGAAGGATGACTGCCCTATGGGTTGTAAACTTCTTTTATACGGGAATAACACGCGGCACGTGTGCCGTTCTGCATGTACCG	Mancabelli	Bacteroides	80% Study
78449cfd3d035cec544c540fb41d829d	AGTGAGGAATATTGGTCAATGGACGAGAGTCTGAACCAGCCAAGTAGCGTGAAGGATGAAGGTCCTACGGATTGTAAACTTCTTTTATAAGGGAATAAACCCTTCCACGTGTGGGAGCTTGTATGTACCT	Mancabelli	Bacteroides	80% Study
f52d93e7fc7c233cf6357ddcfe7694f4	CCTACGGGGCGCAGCAGTGAGGAATATTGGTCAATGGGCGTTAGCCTGAACCAGCCAAGTAGCGTGAAGGATGAAGGCTCTATGGGTCGTAAACTTCTTTTATATAAGAATAAAGTGCAGTATGTATACT	Mancabelli	Bacteroides	80% Study
9cbf74b7f552a178cfb5ce21a361a5e2	CCTACGGGACGCAGCAGTGAGGAATATTGGTCAATGGGCGTTAGCCTGAACCAGCCAAGTAGCGTGAAGGATGAAGGCTCTATGGGTCGTAAACTTCTTTTATATAAGAATAAAGTGCAGTATGTATACT	Mancabelli	Bacteroides	80% Study
c9fd35c37c08457dd8a77d736e38c38c	CCTACGGGGCGCAGCAGTGAGGAATATTGGTCAATGGGCGATGGCCTGAACCAGCCAAGTAGCGTGAAGGATGACTGCCCTATGGGTTGTAAACTTCTTTTATAAAGGAATAAAGTCGGTATGCATACCC	Mancabelli	Bacteroides	80% Study
8324e6168b4d07a9bdf9590d74f2c937	CCTACGGGGCGCAGCAGTGAGGAATATTGGTCAATGGACGAGAGTCTGAACCAGCCAAGTAGCGTGAAGGATGACTGCCCTATGGGTTGTAAACTTCTTTTATACGGGAATAAAGTGAGGCACGTGTGCC	Mancabelli	Bacteroides	80% Study
e68b0ab21e052dc6b152b069c0ff8389	AGTGAGGAATATTGGTCAATGGGCGCAGGCCTGAACCAGCCAAGTAGCGTGAAGGATGAAGGCTCTATGGGTCGTAAACTTCTTTTATATGGGAATAAAGTTTTCCACGTGTGGAATTTTGTATGTACCA	Mancabelli	Bacteroides	80% Study
069a7c4de92b1ccf361a72087b5631c3	GTGAGGAATATTGGTCAATGGGCGATGGCCTGAACCAGCCAAGTAGCGTGAAGGATGACTGCCCTATGGGTTGTAAACTTCTTTTATAAAGGAATAAAGTCGGTATGCATACCCGTTTGCATGTACTTTA	Mancabelli	Bacteroides	80% Study
980cbf3654417ff5c1947540bc1baecf	AGTGAGGAATATTGGTCAATGGACGAGAGTCTGAACCAGCCAAGTAGCGTGAAGGATGACTGCCCTATGGGTTGTAAACTTCTTTTATACGGGAATAAAGTGCAGTATGTATACTGTTTGTATTGTACGT	Mancabelli	Bacteroides	80% Study
2be0d5ee643aab31de96e27c706b33f1	AGTGAGGAATATTGGTCAATGGACGAGAGTCTGAACCAGCCAAGTAGCGTGAAGGATGACTGCCCTATGGGTTGTAAACTTCTTTTATACGGGAATAAAGTGCAGTATGTATACTGTTTTGTATGTACGT	Mancabelli	Bacteroides	80% Study
69800e70a1d0198d01921bb72d63d35d	AGTGAGGAATATTGGTCAATGGACGAGAGTCTGAACCAGCCAAGTAGCGTGAAGGATGACTGCCCTATGGGTTGTAAACTTCTTTTATACGGGAATAAAGTGCAGTATGTATACTGTTTGTATGTACGTA	Mancabelli	Bacteroides	80% Study
c5ac5d128e9faf8816c2743b291f45e9	AGTGAGGAATATTGGTCAATGGACGAGAGTCTGAACCAGCCAAGTAGCGTGAAGGATGACTGCCCTATGGGTTGTAAACTTCTTTTTATACGGGAATAAAGTGAGGCACGTGTGCCTTTTTGTATGTACC	Mancabelli	Bacteroides	80% Study
610568a77627638b824318412f17f45a	AGGGAGGAATATTGGTCAATGGACGAGAGTCTGAACCAGCCAAGTAGCGTGAAGGATGACTGCCCTATGGGTTGTAAACTTCTTTTATATGGGAATAAAACAGGGTATGCATACCCTCTTGTATGTACCA	Mancabelli	Bacteroides	80% Study
b3fb4a108921c25bd2e9113f0b5f7637	AGTGAGGAATATTGGTCAATGGACGAGAGTCTGAACCAGCCAAGTAGCGTGAAGGATGACTGCCCTATGGGTTGTAAACTTCTTTTATATGGGAATAAAGTGAGCCACGTGTGGCTTTTTGTATGTACCA	Mancabelli	Bacteroides	80% Study
a104a55577cd693b2a82dbc05cab2d86	AGTGAGGAATATTGGTCAATGGGCGCAGGCCTGAACCAGCCAAGTAGCGTGAAGGATGACTGCCCTATGGGTTGTAAACTTCTTTTATAAAGGAATAAAGTCGGGTATGTATACCCGTTTGCATGTACTT	Mancabelli	Bacteroides	80% Study
41f75dc1b9b177b96b39b0f870b3fe85	AGTGAGGAATATTGGTCAATGGACGAGAGTCTGAACCAGCCAAGTAGCGTGAAGGATGACTGCCCTATGGGTTGTAAACTTCTTTTATATGGGAATAAAGTGGTCCACGTGTGGATTTTTGTATGTACCA	Mancabelli	Bacteroides	80% Study
f9866583185c3b4b334eb48f14c68219	AGTGAGGAATATTGGTCAATGGGCGAGAGCCTGAACCAGCCAAGTAGCGTGAAGGATGACTGCCCTATGGGTTGTAAACTTCTTTTATGAAGGAATAAAGTCGGGTATGGATACCCGTTTGCATGTACTT	Mancabelli	Bacteroides	80% Study
3cf26c03a40614f002db7e825fd45776	AGTGAGGAATATTGGTCAATGGACGAGAGTCTGAACCAGCCAAGTAGCGTGAAGGATGACTGCCCTATGGGTTGTAAACTTCTTTTATATGGGAATAAAACGTTCCACGTGTGGGATTTTGTATGTACCA	Mancabelli	Bacteroides	80% Study
e9071017f544c5f1a0f5addee9ea3377	AGTGAGGAATATTGGTCAATGGACGAGAGTCTGAACCAGCCAAGTAGCGTGAAGGAAGACTGCCCTATGGGTTGTAAACTTCTTTTATATGGGAATAAAAAAGGCCACGTGTGGCCTATTGTATGTACCT	Mancabelli	Bacteroides	80% Study
223727346d32c10a187607854373d9db	AGTGAGGAATATTGGTCAATGGGCGAGAGCCTGAACCAGCCAAGTAGCGTGAAGGATGACTGCCCTACGGGTTGTAAACTTCTTTTATAAGGGAATAAAGTATTCTACGTGTAGAGTTTTGTATGTACCT	Mancabelli	Bacteroides	80% Study
577f8531d5d355690943ce3218a0b75e	AGGGAGGAATATTGGTCAATGGGCGCTAGCCTGAACCAGCCAAGTAGCGTGAAGGATGAAGGCTCTATGGGTCGTAAACTTCTTTTATATAAGAATAAAGTGCAGTATGTATACTGTTTTGTATGTATTA	Mancabelli	Bacteroides	80% Study
c3bd9d26e77d766c3ea2b27cde2aaf80	AGTGAGGAATATTGGTCAATGGACGAGAGTCTGAACCAGCCAAGTAGCGTGAAGGATGACTGCCCTATGGGTTGTAAACTTCTTTTATACGGGAATAAAGTGAGGCACGCGTGCCTTTTTGTATGTACCG	Mancabelli	Bacteroides	80% Study
bd61b40e932b274221c5084af64be1b0	GTGAGGAATATTGGTCAATGGGCGCTAGCCTGAACCAGCCAAGTAGCGTGAAGGATGACTGCCCTATGGGTTGTAAACTTCTTTTATATGGGAATAAAGTGCAGTATGTATACTGCTTTGCATGTACCTT	Mancabelli	Bacteroides	80% Study
c757a47a6941685d628b4b43e1b24ebe	AGTGAGGAATATTGGTCAATGGGCGAGAGCCTGAACCAGCCAAGTAGCGTGAAGGATGAAGGTCCTACGGATTGTAAACTTCTTTTATACGGGAATAAAGTTTCCTACGTGTAGGATTTTGTATGTACCG	Mancabelli	Bacteroides	80% Study
2b354e1372d34cdd4c59751a5b5d2cf9	AGGGAGGAATATTGGTCAATGGGCGAGAGCCTGAACCAGCCAAGTAGCGTGAAGGATGAAGGCTCTATGGGTCGTAAACTTCTTTTATATGGGAATAAAGTTTTCCACGTGTGGAATTTTGTATGTACCA	Mancabelli	Bacteroides	80% Study
7f4972ca93988437176a01a65fbe608e	AGTGAGGAATATTGGTCAATGGACGAGAGTCTGAACCAGCCAAGTAGCGTGAAGGAAGACTGCCCTATGGGTTGTAAACTTCTTTTATATGGGAATAAAAAAGGTCACGTGTGGCCTATTGTATGTACCT	Mancabelli	Bacteroides	80% Study
2bfba0bb9c782a4224822dcda44e71d6	AGTGAGGAATATTGGTCAATGGGCGAGAGCCTGAACCAGCCAAGTAGCGTGAAGGATGACTGCCCTATGGGTTGTAAACTTCTTTTATAAAGGAATAAAGTCGGGTATGTATACCCGTTTGCATGTACTT	Mancabelli	Bacteroides	80% Study
80fd6ab54bf49cc96cfe5bb6d19412c8	AGTGAGGAATATTGGTCAATGGACGAGAGTCTGAACCAGCCAAGTAGCGTGAAGGATGACTGCCCTATGGGTTGTAAACTTCTTTTATATGGGAATAAAAAGGTCACGTGTGGCCTATTGTATGTACCTT	Mancabelli	Bacteroides	80% Study
e13a9f93d0e86dd4459dcd506263a64b	AGTGAGGAATATTGGTCAATGGACGAGAGTCTGAACCAGCCAAGTAGCGTGAAGGACGACTGCCCTATGGGTTGTAAACTTCTTTTATATAGGAATAAAGTGAGGTATGTATACCTTTTTGTATGTACTA	Mancabelli	Bacteroides	80% Study
2818c9b643390e75e1b019f2a7e73fef	AGTGAGGAATATTGGTCAATGGACGAGAGTCTGAACCAGCCAAGTAGCGTGAAGGATGACTGCCCTATGGGTTGTAAACTTCTTTTATATGGGAATAAAAAAGTCCACGTGTGGATTCTTGTATGTACCA	Mancabelli	Bacteroides	80% Study
ee9e735357e726f8027db66be4b5d943	AGTGAGGAATATTGGTCAATGGACGAGAGTCTGAACCAGCCAAGTAGCGTGAAGGAAGACTGCCCTATGGGTTGTAAACTTCTTTTATATAGGAATAAAGTGCAGCACGTGTGCTGTTTTGTATGTACTA	Mancabelli	Bacteroides	80% Study
f41cc747de2f661bbf96195aa146aac7	CTACGGGGCGCAGCAGTGAGGAATATTGGTCAATGGGCGATGGCCTGAACCAGCCAAGTAGCGTGAAGGATGACTGCCCTATGGGTTGTAAACTTCTTTTATAAAGGAATAAAGTCGGTATGCATACCCG	Mancabelli	Bacteroides	80% Study
1b56ff8f4097c1112513f08842ef9db1	CTACGGGGCGCAGCAGTGAGGAATATTGGTCAATGGGCGAGAGCCTGAACCAGCCAAGTAGCGTGAAGGATGACTGCCCTATGGGTTGTAAACTTCTTTTATAAAGGAATAAAGTCGGGTATGGATACCC	Mancabelli	Bacteroides	80% Study
e5bb385585dfca8d5945188824871db7	CTACGGGGCGCAGCAGTGAGGAATATTGGTCAATGGACGAGAGTCTGAACCAGCCAAGTAGCGTGAAGGATGACTGCCCTATGGGTTGTAAACTTCTTTTATACGGGAATAAAGTGAGGCACGTGTGCCT	Mancabelli	Bacteroides	80% Study
176d75b5cd4e7768db142847cc6fd387	CTACGGGACGCAGCAGTGAGGAATATTGGTCAATGGACGAGAGTCTGAACCAGCCAAGTAGCGTGAAGGATGACTGCCCTATGGGTTGTAAACTTCTTTTATACGGGAATAAAGTGAGGCACGTGTGCCT	Mancabelli	Bacteroides	80% Study
6b9b0e4c9158d69ec67ebf800124790b	CTACGGGGCGCAGCAGTGAGGAATATTGGTCAATGGGCGAGAGCCTGAACCAGCCAAGTAGCGTGAAGGATGACTGCCCTATGGGTTGTAAACTTCTTTTATAAAGGAATAAAGTCGGTATGCATACCCG	Mancabelli	Bacteroides	80% Study
cfb000dc3621c97c8f74a81f49a1ffdd	CTACGGGGCGCAGCAGTGAGGAATATTGGTCAATGGACGAGAGTCTGAACCAGCCAAGTAGCGTGAAGGATGACTGCCCTATGGGTTGTAAACTTCTTTTATACGGGAATAAAGTTAGGCACGTGTGCCT	Mancabelli	Bacteroides	80% Study
3bc3c2086836d9bd4875764998d70d9d	CTACGGGGCGCAGCAGTGAGGAATATTGGTCAATGGGCGCAGGCCTGAACCAGCCAAGTAGCGTGAAGGATGACTGCCCTATGGGTTGTAAACTTCTTTTATATGGGAATAAAGTTTTCCACGTGTGGAA	Mancabelli	Bacteroides	80% Study
62c5a110d7685810e6f740222a62fcbd	CTACGGGGCGCAGCAGTGAGGAATATTGGTCAATGGACGAGAGTCTGAACCAGCCAAGTAGCGTGAAGGATGACTGCCCTATGGGTTGTAAACTTCTTTTATACGGGAATAAAGTGGAGTATGCATACTC	Mancabelli	Bacteroides	80% Study
b25831350256410ee123d6ea0dd7af76	CTACGGGGCGCAGCAGTGAGGAATATTGGTCAATGGGCGATGGCCTGAACCAGCCAAGTAGCGTGAAGGATGACTGCCCTATGGGTTGTAAACTTCTTTTATAAAGGAATAAAGTCGGGTATGCATACCC	Mancabelli	Bacteroides	80% Study
34c4e87227e7e7d1398f35a9ce79f90d	CTACGGGAGGCAGCAGTGAGGAATATTGGTCAATGGGCGCTAGCCTGAACCAGCCAAGTAGCGTGAAGGATGAAGGCTCTATGGGTCGTAAACTTCTTTTATATAAGAATAAAGTGCAGTATGTATACTG	Mancabelli	Bacteroides	80% Study
a0fc22b645015a66a925316bc1d3c540	CTACGGGGCGCAGCAGTGAGGAATATTGGTCAATGGGCGCTAGCCTGAACCAGCCAAGTAGCGTGAAGGATGAAGGCTCTATGGGTCGTAAACTTCTTTTATATAAGAATAAAGTGCAGTATGTATACTG	Mancabelli	Bacteroides	80% Study
212e7aa4d26678d6fde5caf477c56f92	CTACGGGACGCAGCAGTGAGGAATATTGGTCAATGGGCGCTAGCCTGAACCAGCCAAGTAGCGTGAAGGATGAAGGCTCTATGGGTCGTAAACTTCTTTTATATAAGAATAAAGTGCAGTATGTATACTG	Mancabelli	Bacteroides	80% Study
7e43c99cbb62d29ea44ca487d2516833	CTACGGGGGGCAGCAGTGAGGAATATTGGTCAATGGGCGCTAGCCTGAACCAGCCAAGTAGCGTGAAGGATGAAGGCTCTATGGGTCGTAAACTTCTTTTATATAAGAATAAAGTGCAGTATGTATACTG	Mancabelli	Bacteroides	80% Study
bf0fa1e799eef1f059c2823739d7c144	CTACGGGGCGCAGCAGTGAGGAATATTGGTCAATGGACGAGAGTCTGAACCAGCCAAGTAGCGTGAAGGATGAAGGTTCTATGGATTGTAAACTTCTTTTATACGGGAATAAACGAATCCACGCGTGGAT	Mancabelli	Bacteroides	80% Study
c87c4252ff8d449dd8450e0c8a300c8a	CTACGGGAGGCAGCAGTGAGGAATATTGGTCAATGGACGAGAGTCTGAACCAGCCAAGTAGCGTGAAGGATGAAGGTTCTATGGATTGTAAACTTCTTTTATACGGGAATAAACGAATCCACGCGTGGAT	Mancabelli	Bacteroides	80% Study
fb819652b19bccf4d5ea0d0074e6089f	CTACGGGACGCAGCAGTGAGGAATATTGGTCAATGGACGAGAGTCTGAACCAGCCAAGTAGCGTGAAGGATGAAGGTTCTATGGATTGTAAACTTCTTTTATACGGGAATAAACGAATCCACGCGTGGAT	Mancabelli	Bacteroides	80% Study
5d916997b09f28da8edef09e709ec400	CTACGGGGGCAGCAGTGAGGAATATTGGTCAATGGGCGCTAGCCTGAACCAGCCAAGTAGCGTGAAGGATGAAGGCTCTATGGGTCGTAAACTTCTTTTATATAAGAATAAAGTGCAGTATGTATACTGT	Mancabelli	Bacteroides	80% Study
171009d1db48843a40a9bbd34c982971	CTACGGGACGCAGCAGTGAGGAATATTGGTCAATGGGCGCAGGCCTGAACCAGCCAAGTAGCGTGAAGGATGACTGCCCTATGGGTTGTAAACTTCTTTTATATGGGAATAAAGTTTTCCACGTGTGGAA	Mancabelli	Bacteroides	80% Study
32ba1c7ddd74a6e088b174c55fe4f9da	CTACGGGGGGCAGCAGTGAGGAATATTGGTCAATGGGCGCAGGCCTGAACCAGCCAAGTAGCGTGAAGGATGACTGCCCTATGGGTTGTAAACTTCTTTTATATGGGAATAAAGTTTTCCACGTGTGGAA	Mancabelli	Bacteroides	80% Study
aedf4fa1ddcec7e2663e0e5aede2dfa2	AGTGAGGAATATTGGTCAATGGACGCGAGTCTGAACCAGCCAAGTAGCGTGAAGGATGACTGCCCTATGGGTTGTAAACTTCTTTTATATGGGAATAAAGTTTTCCACGTGTGGAATTTTGTATGTACCA	Mancabelli	Bacteroides	80% Study
317a5d31a61559813452bd9983d2e16c	TACGGGGCGCAGCAGTGAGGAATATTGGTCAATGGGCGATGGCCTGAACCAGCCAAGTAGCGTGAAGGATGACTGCCCTATGGGTTGTAAACTTCTTTTATAAAGGAATAAAGTCGGTATGCATACCCGT	Mancabelli	Bacteroides	80% Study
b39af60c8f35e40afe61cadfc6af71bb	TACGGGGGGCAGCAGTGAGGAATATTGGTCAATGGGCGATGGCCTGAACCAGCCAAGTAGCGTGAAGGATGACTGCCCTATGGGTTGTAAACTTCTTTTATAAAGGAATAAAGTCGGTATGCATACCCGT	Mancabelli	Bacteroides	80% Study
6b0a0fa9bc78b9a958a2ee98567718eb	TACGGGGCGCAGCAGTGAGGAATATTGGTCAATGGGCGATGGCCTGAACCAGCCAAGTAGCGTGAAGGATGACTGCCCTATGGGTTGTAAACTTCTTTTATAAAGGAATAAAGTCGGGTATGCATACCCG	Mancabelli	Bacteroides	80% Study
4d990e560a2b190e159663b88f220019	TACGGGGCGCAGCAGTGAGGAATATTGGTCAATGGACGAGAGTCTGAACCAGCCAAGTAGCGTGAAGGATGACTGCCCTATGGGTTGTAAACTTCTTTTATACGGGAATAAAGTGAGGCACGTGTGCCTT	Mancabelli	Bacteroides	80% Study
0d8264b099b2d5adec94acf9af225712	TACGGGACGCAGCAGTGAGGAATATTGGTCAATGGACGAGAGTCTGAACCAGCCAAGTAGCGTGAAGGATGACTGCCCTATGGGTTGTAAACTTCTTTTATACGGGAATAAAGTGAGGCACGTGTGCCTT	Mancabelli	Bacteroides	80% Study
a6a4d1a423a904fcdd438362f75818a4	TACGGGGCGCAGCAGTGAGGAATATTGGTCAATGGGCGAGAGCCTGAACCAGCCAAGTAGCGTGAAGGATGACTGCCCTATGGGTTGTAAACTTCTTTTATAAAGGAATAAAGTCGGGTATGGATACCCG	Mancabelli	Bacteroides	80% Study
c8ca4340a064244beff00974539fcef7	TACGGGACGCAGCAGGGAGGAATATTGGTCAATGGGCGAGAGCCTGAACCAGCCAAGTAGCGTGAAGGATGACTGCCCTATGGGTTGTAAACTTCTTTTATAAAGGAATAAAGTCGGGTATGGATACCCG	Mancabelli	Bacteroides	80% Study
b2af93beac21ebdba4b432262ca1283a	TACGGGGCGCAGCAGTGAGGAATATTGGTCAATGGACGAGAGTCTGAACCAGCCAAGTAGCGTGAAGGATGACTGCCCTATGGGTTGTAAACTTCTTTTATACGGGAATAAAGTTAGCCACGTGTGGTTT	Mancabelli	Bacteroides	80% Study
6592dce104b758bd65008f6003322c5e	TACGGGGGGCAGCAGTGAGGAATATTGGTCAATGGACGAGAGTCTGAACCAGCCAAGTAGCGTGAAGGATGACTGCCCTATGGGTTGTAAACTTCTTTTATACGGGAATAAAGTTAGCCACGTGTGGTTT	Mancabelli	Bacteroides	80% Study
6708127eca53fd1fa35fcb5242d53d0a	TACGGGACGCAGCAGTGAGGAATATTGGTCAATGGGCGATGGCCTGAACCAGCCAAGTAGCGTGAAGGATGACTGCCCTATGGGTTGTAAACTTCTTTTATAAAGGAATAAAGTCGGTATGCATACCCGT	Mancabelli	Bacteroides	80% Study
209196f838cf1d18274a71d743f199b2	TACGGGACGCAGCAGTGAGGAATATTGGTCAATGGGCGAGAGCCTGAACCAGCCAAGTAGCGTGAAGGATGACTGCCCTATGGGTTGTAAACTTCTTTTATAAAGGAATAAAGTCGGGTATGGATACCCG	Mancabelli	Bacteroides	80% Study
6804560e4b319a5068605d615bdc15ba	TACGGGACGCAGCAGTGAGGAATATTGGTCAATGGGCGAGAGCCTGAACCAGCCAAGTAGCGTGAAGGATGACTGCCCTATGGGTTGTAAACTTCTTTTATAAAGGAATAAAGTCGGTATGCATACCCGT	Mancabelli	Bacteroides	80% Study
e2e5387abecc01b72373a327bd55b9c8	TACGGGGCGCAGCAGGGAGGAATATTGGTCAATGGGCGATGGCCTGAACCAGCCAAGTAGCGTGAAGGATGACTGCCCTATGGGTTGTAAACTTCTTTTATAAAGGAATAAAGTCGGTATGCATACCCGT	Mancabelli	Bacteroides	80% Study
3ad9f555b6e325d02d75d700accc5b14	TACGGGACGCAGCAGTGAGGAATATTGGTCAATGGGCGCTAGCCTGAACCAGCCAAGTAGCGTGAAGGATGACTGCCCTATGGGTTGTAAACTTCTTTTATATGGGAATAAAGTGCAGTATGTATACTGC	Mancabelli	Bacteroides	80% Study
ef0ce6b4b6ae5a7f4be5ff6731e59722	TACGGGGCGCAGCAGTGAGGAATATTGGTCAATGGGCGAGAGCCTGAACCAGCCAAGTAGCGTGAAGGATGAAGGCTCTATGGGTCGTAAACTTCTTTTATATGGGAATAAAGTTTTCCACGTGTGGAAT	Mancabelli	Bacteroides	80% Study
53ee7a74d74e32e1f05040b7ac731ded	TACGGGACGCAGCAGTGAGGAATATTGGTCAATGGGCGCAGGCCTGAACCAGCCAAGTAGCGTGAAGGATGACTGCCCTATGGGTTGTAAACTTCTTTTATATGGGAATAAAGTTTTCCACGTGTGGAAT	Mancabelli	Bacteroides	80% Study
ed4ddf0f4d5a16ee78bd01421caa51fb	TACGGGGCGCAGCAGTGAGGAATATTGGTCAATGGGCGCAGGCCTGAACCAGCCAAGTAGCGTGAAGGATGACTGCCCTATGGGTTGTAAACTTCTTTTATATGGGAATAAAGTTTTCCACGTGTGGAAT	Mancabelli	Bacteroides	80% Study
516b3461e071dfeb20e3355da4f71e31	TACGGGACGCAGCAGTGAGGAATATTGGTCAATGGGCGATGGCCTGAACCAGCCAAGTAGCGTGAAGGATGACTGCCCTATGGGTTGTAAACTTCTTTTATAAAGGAATAAAGTCGGGTATGCATACCCG	Mancabelli	Bacteroides	80% Study
6ac7010b5a37ecd1475fd7d84d0ddc6f	TACGGGGGGCAGCAGTGAGGAATATTGGTCAATGGGCGCTAGCCTGAACCAGCCAAGTAGCGTGAAGGATGACTGCCCTATGGGTTGTAAACTTCTTTTATATGGGAATAAAGTGCAGTATGTATACTGC	Mancabelli	Bacteroides	80% Study
5877389383d0cf597b92909e46af8a79	AGTGAGGAATATTGGTCAATGGGCGGTAGCCTGAACCAGCCAAGTAGCGTGAAGGATGAAGGCTCTATGGGTCGTAAACTTCTTTTATATAAGAATAAAGTGCAGTATGTATACTGTTTTGTATGTATTA	Mancabelli	Bacteroides	80% Study
95340f98bc3630f373fb57901e04968c	AGTGAGGAATATTGGTCAATGGACGGGAGTCTGAACCAGCCAAGTAGCGTGAAGGATGACTGCCCTATGGGTTGTAAACTTCTTTTATATGGGAATAAAGTTTTCCACGTGTGGAATTTTGTATGTACCA	Mancabelli	Bacteroides	80% Study
753a2d561ec9b61729b83f07f028a50f	AGTGAGGAATATTGGTCAATGGGCGCTAGCCTGAACCAGCCAAGTAGCGTGAAGGATGAAGGCTCTATGGGTCGTAAACTTCTTTTATATAAGAATAAAGTGCAGTATGTATACTGTTTGTATGTATTAT	Mancabelli	Bacteroides	80% Study
2ca8c796586e010cd3becfd8b2748137	AGTGAGGAATATTGGTCAATGGGCGCTAGCCTGAACCAGCCAAGTAGCGTGAAGGATGAAGGCTCTATGGGTCGTAAACTTCTTTTTATATAAGAATAAAGTGCAGTATGTATACTGTTTTGTATGTATT	Mancabelli	Bacteroides	80% Study
0599104f9833fcb046aff6d56797f7f0	GTGAGGAATATTGGTCAATGGGCGGTAGCCTGAACCAGCCAAGTAGCGTGAAGGATGAAGGCTCTATGGGTCGTAAACTTCTTTTATATAAGAATAAAGTGCAGTATGTATACTGTTTTGTATGTATTAT	Mancabelli	Bacteroides	80% Study
2c0952a8edddafe4993aed0af0da3e1f	AGTGAGGAATATTGGTCAATGGGCGGTAGCCTGAACCAGCCAAGTAGCGTGAAGGATGAAGGCTCTATGGGTCGTAAACTTCTTTTATATAAGAATAAAGTGCAGTATGTATACTGTTTGTATGTATTAT	Mancabelli	Bacteroides	80% Study
a3d80c5cdaf8d549a6ec4f34ee54764f	AGTGAGGAATATTGGTCAATGGACGAGAGTCTGAACCAGCCAAGTAGCGTGAAGGATGACTGCCCTATGGGTTGTAAACTTCTTTTATATGGGAATAAAAAAGGTCACGTGTGGCCTATTGTATGTACCT	Mancabelli	Bacteroides	80% Study
7202cb5ebf700006734725dcd20e9d67	AGGGAGGAATATTGGTCAATGGACGAGAGTCTGAACCAGCCAAGTAGCGTGAAGGATGACTGCCCTATGGGTTGTAAACTTCTTTTATATGGGAATAAAATGTTTCACGTGTGGGATTTTGTATGTACCA	Mancabelli	Bacteroides	80% Study
a5b2c2bf72f7d3625899439c19bc7f5d	AGTGAGGAATATTGGTCAATGGACGAGAGTCTGAACCAGCCAAGTAGCGTGAAGGAAGACTGCCCTATGGGTTGTAAACTTCTTTTATATGGGAATAAAAAAGGCCACGTGTGGTCTATTGTATGTACCT	Mancabelli	Bacteroides	80% Study
10659f32b2df76b6b7c4295f777409e3	AGTGAGGAATATTGGTCAATGGACGAGAGTCTGAACCAGCCAAGTAGCGTGAAGGATGACTGCCCTATGGGTTGTAAACTTCTTTTATATGGGAATAAAAAAGGCCACGTGTGACCTATTGTATGTACCT	Mancabelli	Bacteroides	80% Study
2544b9eb9f634dc5826251cd8eb92e13	AGTGAGGAATATTGGTCAATGGACGAGAGTCTGAACCAGCCAAGTAGCGTGAAGGATGACTGCCCTACGGGTTGTAAACTTCTTTTATAAGGGAATAAAGTGATCCACGTGTGGATTATTGCATGTACCT	Mancabelli	Bacteroides	80% Study
3b44465280d0849fd6a3837ed77e9534	AGTGAGGAATATTGGTCAATGGACGAGAGTCTGAACCAGCCAAGTAGCGTGAAGGATGACTGCCCTACGGGTTGTAAACTTCTTTTATAAGGGAATAAAGTGATCCACGTGTGGGTTATTGCATGTACCT	Mancabelli	Bacteroides	80% Study
e572381bf2db2dae7445d76b78535a61	ACGGGGCGCAGCAGTGAGGAATATTGGTCAATGGGCGATGGCCTGAACCAGCCAAGTAGCGTGAAGGATGACTGCCCTATGGGTTGTAAACTTCTTTTATAAAGGAATAAAGTCGGTATGCATACCCGTT	Mancabelli	Bacteroides	80% Study
ef653647ec4a1893bed88788cda02245	ACGGGGCGCAGCAGTGAGGAATATTGGTCAATGGACGAGAGTCTGAACCAGCCAAGTAGCGTGAAGGATGACTGCCCTATGGGTTGTAAACTTCTTTTATACGGGAATAAAGTGGAGTATGCATACTCCT	Mancabelli	Bacteroides	80% Study
6b2853f07805be498b06ae7befbc33cb	ACGGGGCGCAGCAGTGAGGAATATTGGTCAATGGGCGATGGCCTGAACCAGCCAAGTAGCGTGAAGGATGACTGCCCTATGGGTTGTAAACTTCTTTTATAAAGGAATAAAGTCGGGTATGCATACCCGT	Mancabelli	Bacteroides	80% Study
d0ef630d3b17aa334085ea0a0dbf7f83	ACGGGGGGCAGCAGTGAGGAATATTGGTCAATGGGCGATGGCCTGAACCAGCCAAGTAGCGTGAAGGATGACTGCCCTATGGGTTGTAAACTTCTTTTATAAAGGAATAAAGTCGGTATGCATACCCGTT	Mancabelli	Bacteroides	80% Study
acd2d99dfa875cdcbdf160b6b1fc27f0	ACGGGGGGCAGCAGTGAGGAATATTGGTCAATGGGCGATGGCCTGAACCAGCCAAGTAGCGTGAAGGATGACTGCCCTATGGGTTGTAAACTTCTTTTATAAAGGAATAAAGTCGGGTATGCATACCCGT	Mancabelli	Bacteroides	80% Study
458179c99ae56665c9b1b4fcfef18181	ACGGGGGGCAGCAGTGAGGAATATTGGTCAATGGACGAGAGTCTGAACCAGCCAAGTAGCGTGAAGGATGACTGCCCTATGGGTTGTAAACTTCTTTTATACGGGAATAAAGTGGAGTATGCATACTCCT	Mancabelli	Bacteroides	80% Study
6ec3279c40f88b0b05e7a514e2835cf7	ACGGGACGCAGCAGTGAGGAATATTGGTCAATGGGCGATGGCCTGAACCAGCCAAGTAGCGTGAAGGATGACTGCCCTATGGGTTGTAAACTTCTTTTATAAAGGAATAAAGTCGGTATGCATACCCGTT	Mancabelli	Bacteroides	80% Study
1ec9e82d0307605b08284d0c793faa1f	ACGGGACGCAGCAGTGAGGAATATTGGTCAATGGACGAGAGTCTGAACCAGCCAAGTAGCGTGAAGGATGACTGCCCTATGGGTTGTAAACTTCTTTTATACGGGAATAAAGTGGAGTATGCATACTCCT	Mancabelli	Bacteroides	80% Study
400360c9165bcd025c07a939f72e62c9	CAATGGGCGAGAGCCTGAACCAGCCAAGTAGCGTGAAGGATGACTGCCCTACGGGTTGTAAACTTCTTTTATAAGGGAATAAAGTATTCTACGTGTAGAGTTTTGTATGTACCTTATGAATAAGCATCGG	Mancabelli	Bacteroides	80% Study
e7c65418afc8909cb84084ffe91d55d3	CAATGGGCGAGAGCCTGAACCAGCCAAGTAGCGTGAAGGATGACTGCCCTACGGGTTGTAAACTTCTTTTATAAGGGAATAAAGTTCTCTACGTGTAGAGTTTTGTATGTACCTTATGAATAAGCATCGG	Mancabelli	Bacteroides	80% Study
4eed35f3dafbcb34876fa75c83e91d96	CAATGGACGAGAGTCTGAACCAGCCAAGTAGCGTGAAGGATGAAGGTCCTACGGATTGTAAACTTCTTTTATAAGGGAATAAACCCTCCCACGTGTGGGAGCTTGTATGTACCTTATGAATAAGCATCGG	Mancabelli	Bacteroides	80% Study
1bf62f2fbff25cd3ac158e2d065339b7	CAATGGGCGAGAGCCTGAACCAGCCAAGTAGCGTGAAGGATGACTGCCCTATGGGTTGTAAACTTCTTTTATACGGGAATAACACCTTCCACGTGTGGAGGGCTGCATGTACCGTATGAATAAGCATCGG	Mancabelli	Bacteroides	80% Study
1558cc9de8364d8d57288078190b78b1	CAATGGGCGAGAGCCTGAACCAGCCAAGTAGCGTGAAGGATGACTGCCCTATGGGTTGTAAACTTCTTTTATACGGGAATAACACGCGGCACGTGTGCCGCTCTGCATGTACCGTATGAATAAGCATCGG	Mancabelli	Bacteroides	80% Study
522b3bb04a687c8e9f1687f703d9f0e5	CAATGGGCGAGAGCCTGAACCAGCCAAGTAGCGTGAAGGATGACGGCCCTACGGGTTGTAAACTTCTTTTGTGCGGGAATAAAGGAGCCTACGTGTAGGCTTTTGCATGTACCGTAACGAATAAGCATCG	Mancabelli	Bacteroides	80% Study
327ae0ddb5399f2a8bf13f2b68ce036d	CAATGGGCGAGAGCCTGAACCAGCCAAGTAGCGTGAAGGATGACTGCCCTATGGGTTGTAAACTTCTTTTATACGGGAATAACATCATCCACGTGTGGGTGTCTGCATGTACCGTATGAATAAGCATCGG	Mancabelli	Bacteroides	80% Study
65e95f1b3eca715843c916386580164d	CAATGGGCGAGAGCCTGAACCAGCCAAGTAGCGTGAAGGAAGACTGCCCTATGGGTTGTAAACTTCTTTTATACGGGAATAAAGTCATCCACGTGTGGATGTTTGTATGTACCGTATGAATAAGGATCGG	Mancabelli	Bacteroides	80% Study
f5aec87f6388c3f0d59bbef91c443ccb	CAATGGACGAGAGTCTGAACCAGCCAAGTAGCGTGAAGGATGAAGGTCCTACGGATTGTAAACTTCTTTTATAAGGGAATAAAACCTTCCACGTGTGGGAGCTTGTATGTACCTTATGAATAAGCATCGG	Mancabelli	Bacteroides	80% Study
01e8756bd32a90dfcdd18a01e771510c	CAATGGACGAGAGTCTGAACCAGCCAAGTAGCGTGAAGGACGACTGCCCTATGGGTTGTAAACTTCTTTTATATGGGAATAAAAAAGTCCACGTGTGGATTCTTGTATGTACCATATGAATAAGCATCGG	Mancabelli	Bacteroides	80% Study
c9d7f5ab06156bb8eaf3d6bb0658bc2d	AGTGAGGAATATTGGTCAATGGACGAGAGTCTGAACCAGCCAAGTAGCGTGAAGGATGACTGCCCTATGGGTTGTAAACTTCTTTTATATGGGAATAAAATGTTCCACGTGTGGGATTTTGTATGTACCA	Mancabelli	Bacteroides	80% Study
6350380ab81ce9cd1954c666c688b320	AGCGAGGAATATTGGTCAATGGGCGATGGCCTGAACCAGCCAAGTAGCGTGAAGGATGACTGCCCTATGGGTTGTAAACTTCTTTTATAAAGGAATAAAGTCGGTATGCATACCCGTTTGCATGTACTTT	Mancabelli	Bacteroides	80% Study
e08f40e5e595791c99235d2f88b3ab14	AGCGAGGAATATTGGTCAATGGGCGATGGCCTGAACCAGCCAAGTAGCGTGAAGGATGACTGCCCTATGGGTTGTAAACTTCTTTTATAAAGGAATAAAGTCGGGTATGCATACCCGTTTGCATGTACTT	Mancabelli	Bacteroides	80% Study
9debdf769ffd089c0762cfad7d22c72b	AGCGAGGAATATTGGTCAATGGACGAGAGTCTGAACCAGCCAAGTAGCGTGAAGGATGACTGCCCTATGGGTTGTAAACTTCTTTTATATGGGAATAAAGTGAGCCACGTGTGGCTTTTTGTATGTACCA	Mancabelli	Bacteroides	80% Study
b1eaf074cdbaf9225df7e9874cc4f39e	AGCGAGGAATATTGGTCAATGGACGAGAGTCTGAACCAGCCAAGTAGCGTGAAGGATGACTGCCCTATGGGTTGTAAACTTCTTTTATACGGGAATAAAGTGAGGCACGTGTGCCTTTTTGTATGTACCG	Mancabelli	Bacteroides	80% Study
7f1e99490f7d9929892780a26702d913	AGCGAGGAATATTGGTCAATGGGCGCTAGCCTGAACCAGCCAAGTAGCGTGAAGGATGAAGGCTCTATGGGTCGTAAACTTCTTTTATATAAGAATAAAGTGCAGTATGTATACTGTTTTGTATGTATTA	Mancabelli	Bacteroides	80% Study
eeb0a349fd2bc44d5739cedc71abc57e	AGTGAGGAATATTGGTCAATGGACGAGAGTCTGAACCAGCCAAGTAGCGTGAAGGATGAAGGTCCTACGGATTGTAAACTTCTTTTATAAGGGAATAAAACCTTCCACGTGTGGGAGCTTGTATGTACCT	Mancabelli	Bacteroides	80% Study
4ab69955ae7da3e93095fa2258a186c6	TACGGGAGGCAGCAGTGAGGAATATTGGTCAATGGGCGATGGCCTGAACCAGCCAAGTAGCGTGAAGGATGACTGCCCTATGGGTTGTAAACTTCTTTTATAAAGGAATAAAGTCGGTATGCATACCCGT	Mancabelli	Bacteroides	80% Study
ad463839bd6cd565805d303bf23358d2	TACGGGGGGCAGCAGTGAGGAATATTGGTCAATGGGCGATGGCCTGAACCAGCCAAGTAGCGTGAAGGATGACTGCCCTATGGGTTGTAAACTTCTTTTATAAAGGAATAAAGTCGGGTATGCATACCCG	Mancabelli	Bacteroides	80% Study
2c62de7ac6cd4b52afc238bcef2c231a	TACGGGGGGCAGCAGTGAGGAATATTGGTCAATGGACGAGAGTCTGAACCAGCCAAGTAGCGTGAAGGATGACTGCCCTATGGGTTGTAAACTTCTTTTATACGGGAATAAAGTGAGGCACGTGTGCCTT	Mancabelli	Bacteroides	80% Study
da1d8eab3a39a730dc31edcfaeb3e91e	TACGGGAGGCAGCAGTGAGGAATATTGGTCAATGGACGAGAGTCTGAACCAGCCAAGTAGCGTGAAGGATGACTGCCCTATGGGTTGTAAACTTCTTTTATACGGGAATAAAGTTAGCCACGTGTGGTTT	Mancabelli	Bacteroides	80% Study
ace4d1a75dac81edcf02d54e58ee0e14	TACGGGAGGCAGCAGTGAGGAATATTGGTCAATGGGCGATGGCCTGAACCAGCCAAGTAGCGTGAAGGATGACTGCCCTATGGGTTGTAAACTTCTTTTATAAAGGAATAAAGTCGGGTATGCATACCCG	Mancabelli	Bacteroides	80% Study
5a015c2059c1f92c977cf631ee270962	TACGGGGGGCAGCAGTGAGGAATATTGGTCAATGGGCGCGAGCCTGAACCAGCCAAGTAGCGTGAAGGATGACTGCCCTATGGGTTGTAAACTTCTTTTATATGGGAATAAAGTTTTCCACGTGTGGAAT	Mancabelli	Bacteroides	80% Study
c363ea2142a5f699a01670c7a8e0ba0e	TACGGGAGGCAGCAGTGAGGAATATTGGTCAATGGACGAGAGTCTGAACCAGCCAAGTAGCGTGAAGGATGACTGCCCTATGGGTTGTAAACTTCTTTTATACGGGAATAAAGTGAGGCACGTGTGCCTT	Mancabelli	Bacteroides	80% Study
2d80be28d9f779b8e8e88919640352fb	AGTGAGGAATATTGGTCAATGGACGGAAGTCTGAACCAGCCAAGTAGCGTGAAGGATGACTGCCCTATGGGTTGTAAACTTCTTTTATAAGGGAATAAAGTACGCCACGTGTGGTGTTTTGCATGTACCT	Mancabelli	Bacteroides	80% Study
1f8e8370bbe2507aa10899a58d553b7a	AGGGAGGAATATTGGTCAATGGACGGGAGTCTGAACCAGCCAAGTAGCGTGAAGGATGACTGCCCTATGGGTTGTAAACTTCTTTTATATGGGAATAAAGTTTTCCACGTGTGGAATTTTGTATGTACCA	Mancabelli	Bacteroides	80% Study
80c46d1522e9bef640101c1fce1078dc	AGGGAGGAATATTGGTCAATGGGCGGTAGCCTGAACCAGCCAAGTAGCGTGAAGGATGAAGGCTCTATGGGTCGTAAACTTCTTTTATATAAGAATAAAGTGCAGTATGTATACTGTTTTGTATGTATTA	Mancabelli	Bacteroides	80% Study
de2ea43c846ae6ff8ca0a5830ba6c175	AGGGAGGAATATTGGTCAATGGACGAGAGTCTGAACCAGCCAAGTAGCGTGAAGGATGACTGCCCTACGGGTTGTAAACTTCTTTTATATGGGAATAAAATGTTCCACGTGTGGGATTTTGTATGTACCA	Mancabelli	Bacteroides	80% Study
057a57813fe64feec55a7c5512a8afed	AGTGAGGAATATTGGTCAATGGACGAGAGTCTGAACCAGCCAAGTAGCGTGAAGGATGAAGGTTCTATGGATTGTAAACTTCTTTTATACGGGAATAAACGAATCCACGCGTGGATTTTTGCATGTACCG	Mancabelli	Bacteroides	80% Study
6475a7d44d39f161f538a43862704fad	AGTGAGGAATATTGGTCAATGGGCGAGAGCCTGAACCAGCCAAGTAGCGTGAAGGATGACTGCCTACGGGTTGTAAACTTCTTTTATAAGGGAATAAAGTTCTCTACGTGTAGAGTTTTGTATGTACCTT	Mancabelli	Bacteroides	80% Study
0536966f7c18eb91ddf4ae0d067c60e2	CAGTGAGGAATATTGGTCAATGGGCGAGAGCCTGAACCAGCCAAGTAGCGTGAAGGATGACTGCCCTACGGGTTGTAAACTTCTTTTATAAGGGAATAAAGTTCTCTACGTGTAGAGTTTTGTATGTACC	Mancabelli	Bacteroides	80% Study
1851a6af46d4764fc581bdfd1adde247	AGTGAGGAATATTGGTCAATGGACGAGAGTCTGAACCAGCCAAGTAGCGTGAAGGATGAAGGTCCTACGGATTGTAAACTTCTTTTATAAGGGAATAAACCTTCCACGTGTGGGAGCTTGTATGTACCTT	Mancabelli	Bacteroides	80% Study
5faac561a475531b209d122e1526c2d4	CAGTGAGGAATATTGGTCAATGGGCGATGGCCTGAACCAGCCAAGTAGCGTGAAGGATGACTGCCCTATGGGTTGTAAACTTCTTTTATAAAGGAATAAAGTCGGTATGCATACCCGTTTGCATGTACTT	Mancabelli	Bacteroides	80% Study
0ee446eff169d784afb251c770990756	CAGCGAGGAATATTGGTCAATGGGCGATGGCCTGAACCAGCCAAGTAGCGTGAAGGATGACTGCCCTATGGGTTGTAAACTTCTTTTATAAAGGAATAAAGTCGGTATGCATACCCGTTTGCATGTACTT	Mancabelli	Bacteroides	80% Study
f7c6ce0bb3e12beb398a085d28065b10	CAGTGAGGAATATTGGTCAATGGGCGATGGCCTGAACCAGCCAAGTAGCGTGAAGGATGACTGCCCTATGGGTTGTAAACTTCTTTTATAAAGGAATAAAGTCGGGTATGCATACCCGTTTGCATGTACT	Mancabelli	Bacteroides	80% Study
dbef49eed6f413d608b09e15460a12f4	AGTGAGGAATATTGGTCAATGGACGAGAGTCTGAACCAGCCAAGTAGCGTGAAGGATGACTGCCCTATGGGTTGTAAACTTCTTTTATACGGGAATAAAGTGGAGTATGATACTCCTTTGTATGTACCGT	Mancabelli	Bacteroides	80% Study
6d803a210959a09bd7dd96242d0ab75a	CCTACGGGGGGCAGCAGTGAGGAATATTGGTCAATGGACGAGAGTCTGAACCAGCCAAGTAGCGTGAAGGATGACTGCCCTATGGGTTGTAAACTTCTTTTATACGGGAATAAAGTGAGGCACGTGTGCC	Mancabelli	Bacteroides	80% Study
6b47726550e6185d93c554e8dc58d69d	CCTACGGGACGCAGCAGTGAGGAATATTGGTCAATGGACGAGAGTCTGAACCAGCCAAGTAGCGTGAAGGATGACTGCCCTATGGGTTGTAAACTTCTTTTATACGGGAATAAAGTGAGGCACGTGTGCC	Mancabelli	Bacteroides	80% Study
fdc209bec955e29fc3b0d37a9740b595	AGTGAGGAATATTGGTCAATGGACGCAAGTCTGAACCAGCCAAGTAGCGTGAAGGATTACGGCCTTCAGGGTTTTAAACTTCTTTTATACGGGAATAAAGGGCTCCACGTGTGGGGTATTGCATGTACCG	Mancabelli	Bacteroides	80% Study
37301da0438d95952dc2def0b524862f	AGTGAGGAATATTGGTCAATGGGCGAGAGCCTGAACCAGCCAAGTAGCGTGAAGGATGACTGCCTACGGGTTGTAAACTTCTTTTATAAGGGAATAAAGTATTCTACGTGTAGAGTTTTGTATGTACCTT	Mancabelli	Bacteroides	80% Study
418c0f4b8c074d66165d37b0360b0ea8	AGTGAGGAATATTGGTCAATGGACGAGAGTCTGAACCAGCCAAGTAGCGTGAAGGATGACTGCCCTATGGGTTGTAAACTTCTTTTATATGGGAATAAAAAAGATCACGTGTGGTCTATTGTATGTACCT	Mancabelli	Bacteroides	80% Study
d4ff7cbfe30e68d6f067350ca3388029	CTACGGGACGCAGCAGTGAGGAATATTGGTCAATGGGCGATGGCCTGAACCAGCCAAGTAGCGTGAAGGATGACTGCCCTATGGGTTGTAAACTTCTTTTATAAAGGAATAAAGTCGGTATGCATACCCG	Mancabelli	Bacteroides	80% Study
c17743640e8e73b04d0eeb64c9575861	AGGGAGGAATATTGGTCAATGGACGAGAGTCTGAACCAGCCAAGTAGCGTGAAGGATGAAGGTCCTACGGATTGTAAACTTCTTTTATAAGGGAATAAACCCTCCCACGTGTGGGAGCTTGTATGTACCT	Mancabelli	Bacteroides	80% Study
6dbc20511f1d21ac85aca7082cb8303d	AGTGAGGAATATTGGTCAATGGGCGAGAGCCTGAACCAGCCAAGTAGCGTGAAGGATGACGGCCCTACGGGTTGTAAACTTCTTTTGTGCGGGAATAAAGGAACCTACGTGTAGGTTTTTGCATGTACCG	Mancabelli	Bacteroides	80% Study
d8ca897c27eb3386173375f2b2e86808	AGGGGGGGAATATTGCACAATGGGGGAAACCCTGATGCAGCGACGCCGCGTGGAGGAAGAAGGTCTTCGGATTGTAAACTCCTGTTGTTGGGGAAAAGAAGGATGGTACCCAACAAGGAAGTGACGGCTA	Mancabelli	Faecalibacterium	80% Study
4ff7fe982f507009b6c5a687040e4a10	AGTGGGGAATATTGCACAATGGGGGAAACCCTGATGCAGCGACGCCGCGTGGAGGAAGAAGGTCTTCGGATTGTAAACTCCTGTTGTTGAGGAAGATAATGACGGTACTCAACAAGGAAGTGACGGCTAA	Mancabelli	Faecalibacterium	80% Study
66d38e2921a834d09efc7ff519bf8a4f	AGTGGGGAATATTGCACAATGGAGGAAACTCTGATGCAGCGACGCCGCGTGGAGGAAGAAGGTCTTCGGATTGTAAACTCCTGTTGTTGAGGACGATAATGACGGTACTCAACAAGGAAGTGACGGCTAA	Mancabelli	Faecalibacterium	80% Study
4b42ae9beafdbb8ef5c816fa21a97ee7	AGTGGGGAATATTGCACAATGGGGGAAACCCTGATGCAGCGACGCCGCGTGGAGGAAGAAGGTCTTCGGATTGTAAACTCCTGTTGTTGAGGAAGAAAAGGACGGTACTCAACAAGGAAGTGACGGCTAA	Mancabelli	Faecalibacterium	80% Study
4d194952ab08b28c7e02076824c488a1	AGTGGGGAATATTGCACAATGGGGGGAAACCCTGATGCAGCGACGCCGCGTGGAGGAAGAAGGTCTTCGGATTGTAAACTCCTGTTGTTGAGGAAGAAAAGGACGGTACTCAACAAGGAAGTGACGGCTA	Mancabelli	Faecalibacterium	80% Study
32d25ee7924e06763e946e79352e35b7	AGTGGGGAATATTGCACAATGGGGGAAACCCTGATGCAGCGACGCCGCGTGGAGGAAGAAGGTCTTCGGATTGTAAACTCCTGTTGTTGGGGAAAAAGAGGATGGTACCCAACAAGGAAGTGACGGCTAA	Mancabelli	Faecalibacterium	80% Study
c529fc168ec21f74cbad00038e55c3b6	AGTGGGGAATATTGCACAATGGGGGAAACCCTGATGCAGCGACGCCGCGTGGAGGAAGAAGGTCTTCGGATTGTAAACTCCTGTTGTTGGGGAAAATCGAGATGGTACCCAACAAGGAAGTGACGGCTAA	Mancabelli	Faecalibacterium	80% Study
b357998482f6a0bc22ba349bff62d004	AGTGGGGAATATTGCACAATGGGGGAAACCCTGATGCAGCGACGCCGCGTGGAGGAAGAAGGTCTTCGGATTGTAAACTCCTGTTGTTAGGGAAAAATCGGATGGTACCTAACAAGGAAGTGACGGCTAA	Mancabelli	Faecalibacterium	80% Study
bd922cb96e3e2947c0c863ca7a49dc5d	AGTGGGGAATATTGCACAATGGAGGAAACTCTGATGCAGCGACGCCGCGTGGAGGAAGAAGGTCTTCGGATTGTAAACTCCTGTTGTTGGGGAAAAATCGGATGGTACCCAACAAGGAAGTGACGGCTAA	Mancabelli	Faecalibacterium	80% Study
31df21754b0a9a0b077a2f9eafd6652c	AGTGGGGAATATTGCACAATGGGGGAAACCCTGATGCAGCGACGCCGCGTGGAGGAAGAAGGTCTTCGGATTGTAAACTCCTGTTGTTGGGGAAAATCGGAAGATGGTACCCAACAAGGAAGTGACGGCT	Mancabelli	Faecalibacterium	80% Study
9a5324f57967aebe23fa0a51f0d25aa8	AGTGGGGAATATTGCACAATGGGGGAAACCCTGATGCAGCGACGCCGCGTGGAGGAAGAAGGTCTTCGGATTGTAAACTCCTGTTGTTAGGGAAAATCGAGATGGTACCTAACAAGGAAGTGACGGCTAA	Mancabelli	Faecalibacterium	80% Study
c55f67b311e7cd7a27b90bd9a0795984	AGTGGGGAATATTGCACAATGGGGGAAACCCTGATGCAGCGACGCCGCGTGGAGGAAGAAGGTCTTCGGATTGTAAACTCCTGTTGTTGGGGAAAAGAAGGATGGTACCCAACAAGGAAGTGACGGCTAA	Mancabelli	Faecalibacterium	80% Study
ff5ded552265ab7c0dac6191071b7ac0	AGTGGGGAATATTGCACAATGGGGGAAACCCTGATGCAGCGACGCCGCGTGGAGGAAGAAGGTCTTCGGATTGTAAACTCCTGTTGTTGGGGAAGATAATGACGGTACCCAACAAGGAAGTGACGGCTAA	Mancabelli	Faecalibacterium	80% Study
535d30e253ef88d0a413a8c97b5d4792	GTGGGGAATATTGCACAATGGGGGAAACCCTGATGCAGCGACGCCGCGTGGAGGAAGAAGGTCTTCGGATTGTAAACTCCTGTTGTTGGGGAAAAGAAGGATGGTACCCAACAAGGAAGTGACGGCTAAC	Mancabelli	Faecalibacterium	80% Study
d74681e156a91c69c0b01c1d2fff50a7	AGTGGGGAATATTGCACAATGGGGGAAACCCTGATGCAGCGACGCCGCGTGGAGGAAGAAGGTCTTCGGATTGTAAACTCCTGTTGTTGGGGAAAAGAAGGGATGGTACCCAACAAGGAAGTGACGGCTA	Mancabelli	Faecalibacterium	80% Study
7b858f3f1b969ad31550a6d83f8d2e9a	AGGGGGGAATATTGCACAATGGGGGAAACCCTGATGCAGCGACGCCGCGTGGAGGAAGAAGGTCTTCGGATTGTAAACTCCTGTTGTTGGGGAAAAGAAGGATGGTACCCAACAAGGAAGTGACGGCTAA	Mancabelli	Faecalibacterium	80% Study
07412f36ad6e6263a8e03acf2ed6943f	AGGGGGGGAATATTGCACAATGGGGGGAAACCCTGATGCAGCGACGCCGCGTGGAGGAAGAAGGTCTTCGGATTGTAAACTCCTGTTGTTGGGGAAAAGAAGGATGGTACCCAACAAGGAAGTGACGGCT	Mancabelli	Faecalibacterium	80% Study
e3cd6afb0cc463099937fad667ee03c8	AGTGGGGAATATTGCACAATGGGGGAAACCCTGATGCAGCGACGCCGCGTGGAGGAAGAAGGTCTTCGGATTGTAAACTCCTGTTGTTGAGGAAAAAACGGATGGTACTCAACAAGGAAGTGACGGCTAA	Mancabelli	Faecalibacterium	80% Study
e1f5cfdc67c0c9276699270101161734	CTACGGGGCGCAGCAGTGGGGAATATTGCACAATGGGGGAAACCCTGATGCAGCGACGCCGCGTGGAGGAAGAAGGTCTTCGGATTGTAAACTCCTGTTGTTGAGGAAGATAATGACGGTACTCAACAAG	Mancabelli	Faecalibacterium	80% Study
bfaf6194b0c66561dd1de3adb5ab9ff8	CTACGGGACGCAGCAGTGGGGAATATTGCACAATGGGGGAAACCCTGATGCAGCGACGCCGCGTGGAGGAAGAAGGTCTTCGGATTGTAAACTCCTGTTGTTGAGGAAGATAATGACGGTACTCAACAAG	Mancabelli	Faecalibacterium	80% Study
6c7ed2f1a3c3aeace22201d62cc1a632	AGTGGGGAATATTGCACAATGGGGGAAACCCTGATGCAGCGACGCCGCGTGGAGGAAGAAGGTCTTCGGATTGTAAACTCCTGTTGTTGGGGAAAAATCGGGAATGGTACCCAACAAGGAAGTGACGGCT	Mancabelli	Faecalibacterium	80% Study
e70d2fad262779939811b0c6bddd9074	AGTGGGGAATATTGCACAATGGGGGAAACCCTGATGCAGCGACGCCGCGTGGAGGAAGAAGGTCTTCGGATTGTAAACTCCTGTTGTTGGGGAAAAGAAGGGAATGGTACCCAACAAGGAAGTGACGGCT	Mancabelli	Faecalibacterium	80% Study
d8d1534482b8a8a18cdec1b902b4c85e	AGTGGGGAATATTGCACAATGGGGGAAACCCTGATGCAGCGACGCCGCGTGGAGGAAGAAGGTCTTCGGATTGTAAACTCCTGTTGTTGAGGAAAAAGAGGATGGTACTCAACAAGGAAGTGACGGCTAA	Mancabelli	Faecalibacterium	80% Study
75b077737c8dbda5953e20afd2ba368c	AGTGGGGAATATTGCACAATGGAGGAAACTCTGATGCAGCGACGCCGCGTGGAGGAAGAAGGTCTTCGGATTGTAAACTCCTGTTGTTGGGGAAAATCGAGATGGTACCCAACAAGGAAGTGACGGCTAA	Mancabelli	Faecalibacterium	80% Study
4cd481044f06f28623455ea902dbabd2	AGTGGGGAATATTGCACAATGGAGGAAACTCTGATGCAGCGACGCCGCGTGGAGGAAGAAGGTCTTCGGATTGTAAACTCCTGTTGTTGGGGAAAATCAAGATGGTACCCAACAAGGAAGTGACGGCTAA	Mancabelli	Faecalibacterium	80% Study
69a050f3e6cf0940dc35390766856444	AGTGGGGAATATTGCACAATGGGGGAAACCCTGATGCAGCGACGCCGCGTGGAGGAAGAAGGTCTTCGGATTGTAAACTCCTGTTGTTGGGGAAAAATCGGATGGTACCCAACAAGGAAGTGACGGCTAA	Mancabelli	Faecalibacterium	80% Study
2ceedc49fdb76f3b48a944f223f9dc15	TACGGGGCGCAGCAGTGGGGAATATTGCACAATGGGGGAAACCCTGATGCAGCGACGCCGCGTGGAGGAAGAAGGTCTTCGGATTGTAAACTCCTGTTGTTGAGGAAGATAATGACGGTACTCAACAAGG	Mancabelli	Faecalibacterium	80% Study
4f42fc7d67adedf37c952cef9d0279f6	TACGGGACGCAGCAGTGGGGAATATTGCACAATGGGGGAAACCCTGATGCAGCGACGCCGCGTGGAGGAAGAAGGTCTTCGGATTGTAAACTCCTGTTGTTGAGGAAGATAATGACGGTACTCAACAAGG	Mancabelli	Faecalibacterium	80% Study
7ae1c3d59ab65dea183fe2b743672a64	TACGGGACGCAGCAGGGGGGAATATTGCACAATGGGGGAAACCCTGATGCAGCGACGCCGCGTGGAGGAAGAAGGTCTTCGGATTGTAAACTCCTGTTGTTGAGGAAGATAATGACGGTACTCAACAAGG	Mancabelli	Faecalibacterium	80% Study
8068af82b0b1241bfa3176bd256d1270	AGGGGGGGAATATTGCACAATGGGGGAAACCCTGATGCAGCGACGCCGCGTGGAGGAAGAAGGTCTTCGGATTGTAAACTCCTGTTGTTGAGGAAGATAATGACGGTACTCAACAAGGAAGTGACGGCTA	Mancabelli	Faecalibacterium	80% Study
aca6992787b730dd463413bad87593cb	TACGGGGCGCAGCAGTGGGGAATATTGCACAATGGGGGAAACCCTGATGCAGCGACGCCGCGTGGAGGAAGAAGGTCTTCGGATTGTAAACTCCTGTTGTTGAGGAAGAAAAGGACGGTACTCAACAAGG	Mancabelli	Faecalibacterium	80% Study
9a412458a6dc5697a88c3cb511c15d74	CAATGGGGGAAACCCTGATGCAGCGACGCCGCGTGGAGGAAGAAGGTCTTCGGATTGTAAACTCCTGTTGTTGGGGAAAAGAAGGATGGTACCCAACAAGGAAGTGACGGCTAACTACGTGCCAGCAGCC	Mancabelli	Faecalibacterium	80% Study
ac4bf7183c04f14dfe5ff5b33f9e199a	CAATGGGGGAAACCCTGATGCAGCGACGCCGCGTGGAGGAAGAAGGTCTTCGGATTGTAAACTCCTGTTGTTGAGGAAAAAGAGGATGGTACTCAACAAGGAAGTGACGGCTAACTACGTGCCAGCAGCC	Mancabelli	Faecalibacterium	80% Study
4f363419a78a771969b7790a4691fc16	CAATGGGGGAAACCCTGATGCAGCGACGCCGCGTGGAGGAAGAAGGTCTTCGGATTGTAAACTCCTGTTGTTGGGGAAAAAGAGGATGGTACCCAACAAGGAAGTGACGGCTAACTACGTGCCAGCAGCC	Mancabelli	Faecalibacterium	80% Study
bfcaa3784ac41af8e3533f2adb34f8db	AGTGGGGAATATTGCACAATGGAGGAAACTCTGATGCAGCGACGCCGCGTGGAGGAAGAAGGTCTTCGGATTGTAAACTCCTGTTGTTGAGGAAAAAACGGATGGTACTCAACAAGGAAGTGACGGCTAA	Mancabelli	Faecalibacterium	80% Study
f695190a8789e68df98c40c6c8dea5b5	AGTGGGGAATATTGCACAATGGAGGAAACTCTGATGCAGCGATGCCGCGTGGAGGAAGAAGGTCTTCGGATTGTAAACTCCTGTTGTTGAGGAAAAAACGGATGGTACTCAACAAGGAAGTGACGGCTAA	Mancabelli	Faecalibacterium	80% Study
0b6579846213df215015315bc1ff9c14	TACGGGGCGCAGCAGTGGGGAATATTGCACAATGGAGGAAACTCTGATGCAGCGACGCCGCGTGGAGGAAGAAGGTCTTCGGATTGTAAACTCCTGTTGTTGAGGACGATAATGACGGTACTCAACAAGG	Mancabelli	Faecalibacterium	80% Study
f3c1735511a8c5bb79495cf957341b97	TACGGGACGCAGCAGTGGGGAATATTGCACAATGGAGGAAACTCTGATGCAGCGACGCCGCGTGGAGGAAGAAGGTCTTCGGATTGTAAACTCCTGTTGTTGAGGACGATAATGACGGTACTCAACAAGG	Mancabelli	Faecalibacterium	80% Study
07803dcabe8dbb64ee91bbb41539f917	TACGGGGCGCAGCAGTGGGGAATATTGCACAATGGGGGAAACCCTGATGCAGCGACGCCGCGTGGAGGAAGAAGGTCTTCGGATTGTAAACTCCTGTTGTTGGGGAAAAGAAGGGATGGTACCCAACAAG	Mancabelli	Faecalibacterium	80% Study
74c61d7e4f6a7b36f137dbfd110bd97a	TACGGGGCGCAGCAGTGGGGAATATTGCACAATGGGGGAAACCCTGATGCAGCGACGCCGCGTGGAGGAAGAAGGTCTTCGGATTGTAAACTCCTGTTGTTGGGGAAAAGAAGGATGGTACCCAACAAGG	Mancabelli	Faecalibacterium	80% Study
38be265a86c3ca57c8de68be1989a35e	TACGGGAGGCAGCAGTGGGGAATATTGCACAATGGGGGAAACCCTGATGCAGCGACGCCGCGTGGAGGAAGAAGGTCTTCGGATTGTAAACTCCTGTTGTTGGGGAAAAGAAGGGATGGTACCCAACAAG	Mancabelli	Faecalibacterium	80% Study
ccb69a726476fdf42fd89faa27630643	TACGGGAGGCAGCAGTGGGGAATATTGCACAATGGGGGAAACCCTGATGCAGCGACGCCGCGTGGAGGAAGAAGGTCTTCGGATTGTAAACTCCTGTTGTTGGGGAAAAAGAGGATGGTACCCAACAAGG	Mancabelli	Faecalibacterium	80% Study
d7375442cd9ba1d8d075093f793ad5d3	AGTGGGGAATATTGCACAATGGGGGAAACCTTGATGCAGCGACGCCGCGTGGAGGAAGAAGGTCTTCGGATTGTAAACTCCTGTTGTTGAGGAAGAAAAGGACGGTACTCAACAAGGAAGTGACGGCTAA	Mancabelli	Faecalibacterium	80% Study
f69f9709fbb0187caa45d1a6b047837f	AGTGGGGAATATTGCACAATGGGGGAAACCCTGATGCAGCGACGCCGCGTGGAGGAAGAAGGTCTTCGGATTGTAAACTCCTGTTGTTGGGGACGATAATGACGGTACCCAACAAGGAAGTGACGGCTAA	Mancabelli	Faecalibacterium	80% Study
c17ff07c8e8becdcb0c6756960e32dcf	TACGGGGGGCAGCAGTGGGGAATATTGCACAATGGGGGAAACCCTGATGCAGCGACGCCGCGTGGAGGAAGAAGGTCTTCGGATTGTAAACTCCTGTTGTTGGGGAAAAAGAGGGAATGGTACCCAACAA	Mancabelli	Faecalibacterium	80% Study
d240974074c32d6e825b6ac126b2f253	TACGGGGGGCAGCAGTGGGGAATATTGCACAATGGGGGAAACCCTGATGCAGCGACGCCGCGTGGAGGAAGAAGGTCTTCGGATTGTAAACTCCTGTTGTTGAGGAAGAAAAGGACGGTACTCAACAAGG	Mancabelli	Faecalibacterium	80% Study
cad6665823d7573d38c17da929cfd430	TACGGGGCGCAGCAGTGGGGAATATTGCACAATGGGGGAAACCCTGATGCAGCGACGCCGCGTGGAGGAAGAAGGTCTTCGGATTGTAAACTCCTGTTGTTGGGGAAAAAGAGGATGGTACCCAACAAGG	Mancabelli	Faecalibacterium	80% Study
45ab06161b69ff679719b388dfc7ac88	TACGGGGGGCAGCAGTGGGGAATATTGCACAATGGGGGAAACCCTGATGCAGCGACGCCGCGTGGAGGAAGAAGGTCTTCGGATTGTAAACTCCTGTTGTTGGGGAAAAAGAGGGATGGTACCCAACAAG	Mancabelli	Faecalibacterium	80% Study
b53ef61c890611c680adf0b8ea1b8706	TACGGGGGGCAGCAGTGGGGAATATTGCACAATGGAGGAAACTCTGATGCAGCGACGCCGCGTGGAGGAAGAAGGTCTTCGGATTGTAAACTCCTGTTGTTGAGGACGATAATGACGGTACTCAACAAGG	Mancabelli	Faecalibacterium	80% Study
5256203b6c3e6342240289112a8990a3	TACGGGGGGCAGCAGTGGGGAATATTGCACAATGGGGGAAACCCTGATGCAGCGACGCCGCGTGGAGGAAGAAGGTCTTCGGATTGTAAACTCCTGTTGTTGGGGAAAAAGAGGATGGTACCCAACAAGG	Mancabelli	Faecalibacterium	80% Study
1e0d5e3ace187a11ab0b9c0f7cb9e7c3	AGTAGGGAATCTTCCACAATGGACGCAAGTCTGATGGAGCAACGCCGCGTGAGTGAAGAAGGTTTTCGGATCGTAAAGCTCTGTTGTTGGTGAAGAAGGATAGAGGTAGTAACTGGCCTTTATTTGACGG	Mancabelli	Lactobacillus	80% Study
fbfdfc8429f7cb4345d935285dae4168	AGGGAATCTTCCACAATGGACGCAAGTCTGATGGAGCAACGCCGCGTGAGTGAAGAAGGTTTTCGGATCGTAAAGCTCTGTTGTTGGTGAAGAAGGATAGAGGTAGTAACTGGCCTTTATTTGACGGTAA	Mancabelli	Lactobacillus	80% Study
26116c6dfbd941cded080e3eb39da949	AGTAGGGAATCTTCCACAATGGACGCAAGTCTGATGGAGCAACGCCGCGTGAGTGAAGAAGGTCTTCGGATCGTAAAACTCTGTTGTTAGAGAAGAACACGAGTGAGAGTAACTGTTCATTCGATGACGG	Mancabelli	Lactobacillus	80% Study
c380ae5d194cf274c4bcc3ddc834e75b	AGTAGGGAATCTTCCACAATGGGCGCAAGCCTGATGGAGCAACACCGCGTGAGTGAAGAAGGGTTTCGGCTCGTAAAGCTCTGTTGTTGGAGAAGAACGTGCGTGAGAGTAACTGTTCACGCAGTGACGG	Mancabelli	Lactobacillus	80% Study
d141120c6c95331be736281560d387b8	AGTAGGGAATCTTCCACAATGGACGCAAGTCTGATGGAGCAACGCCGCGTGAGTGAAGAAGGGTTTCGGCTCGTAAAGCTCTGTTGGTAGTGAAGAAAGATAGAGGTAGTAACTGGCCTTTATTTGACGG	Mancabelli	Lactobacillus	80% Study
503544edf59b3841f823208d4e8ff5e9	AGGGAATCTTCCACAATGGACGCAAGTCTGATGGAGCAACGCCGCGTGAGTGAAGAAGGGTTTCGGCTCGTAAAGCTCTGTTGGTAGTGAAGAAAGATAGAGGTAGTAACTGGCCTTTATTTGACGGTAA	Mancabelli	Lactobacillus	80% Study
393e85e59e0afdfd305bf40cefff168c	AGTAGGGAATCTTCCACAATGGACGAAAGTCTGATGGAGCAACGCCGCGTGAGTGAAGAAGGGTTTCGGCTCGTAAAGCTCTGTTGGTAGTGAAGAAAGATAGAGGTAGTAACTGGCCTTTATTTGACGG	Mancabelli	Lactobacillus	80% Study
4d6ce98994eb25e481dc4d2bc17cf741	AGTAGGGAATCTTCCACAATGGGCGCAAGCCTGATGGAGCAACACCGCGTGAGTGAAGAAGGGTTTCGGCTCGTAAAGCTCTGTTGTTGAAGAAGAATGTGCAAGAGAGTAACTGTTCTTGTATTGACGG	Mancabelli	Lactobacillus	80% Study
f2acab94276a0f2ba22614b87745be6a	TACGGGGCGCAGCAGTAGGGAATCTTCCACAATGGGCGCAAGCCTGATGGAGCAACACCGCGTGAGTGAAGAAGGGTTTCGGCTCGTAAAGCTCTGTTGTTGGAGAAGAACGTGCGTGAGAGTAACTGTT	Mancabelli	Lactobacillus	80% Study
0f548fc6dde44f5c84652293b06c010b	TACGGGACGCAGCAGTAGGGAATCTTCCACAATGGGCGCAAGCCTGATGGAGCAACACCGCGTGAGTGAAGAAGGGTTTCGGCTCGTAAAGCTCTGTTGTTGGAGAAGAACGTGCGTGAGAGTAACTGTT	Mancabelli	Lactobacillus	80% Study
e313e468f79c0c2c54d9f5d3edbf4899	TACGGGGCGCAGCAGTAGGGAATCTTCCACAATGGACGAAAGTCTGATGGAGCAACGCCGCGTGAGTGAAGAAGGGTTTCGGCTCGTAAAGCTCTGTTGGTAGTGAAGAAAGATAGAGGTAGTAACTGGC	Mancabelli	Lactobacillus	80% Study
4ffadf1ee2f2c4be296be0874065dfee	TACGGGGCGCAGCAGTAGGGAATCTTCCACAATGGGCGAAAGCCTGATGGAGCAACGCCGCGTGGGTGAAGAAGGTCTTCGGATCGTAAAACCCTGTTGTTAGAGAAGAAAGTGCGTGAGAGTAACTGTT	Mancabelli	Lactobacillus	80% Study
ba0666246e59dacf58d09173db3a65d4	TACGGGACGCAGCAGTAGGGAATCTTCCACAATGGACGCAAGTCTGATGGAGCAACGCCGCGTGAGTGAAGAAGGGTTTCGGCTCGTAAAGCTCTGTTGGTAGTGAAGAAAGATAGAGGTAGTAACTGGC	Mancabelli	Lactobacillus	80% Study
e65e9aad771b0597bf93f8076f6700bf	TACGGGGCGCAGCAGTAGGGAATCTTCCACAATGGACGCAAGTCTGATGGAGCAACGCCGCGTGAGTGAAGAAGGGTTTCGGCTCGTAAAGCTCTGTTGGTAGTGAAGAAAGATAGAGGTAGTAACTGGC	Mancabelli	Lactobacillus	80% Study
3b0792a2abb6e4dc79e67143525277cd	AGTAGGGAATCTTCCACAATGGGCGCAAGCCTGATGGAGCAACACCGCGTGAGTGAAGAAGGGTTTCGGCTCGTAAAGCTCTGTTGTTGGAGAAGAACGTGCGTGAGAGTAACTGTTCATGCAGTGACGG	Mancabelli	Lactobacillus	80% Study
d4d156dee9533f403f4860f1432666dc	AGTAGGGAATCTTCCACAATGGGCGCAAGCCTGATGGAGCAACGCCGCGTGAGTGAAGAAGGTCTTCGGATCGTAAAACTCTGTTGTTAGAGAAGAACATGCAGGAGAGTAACTGTTCTTGTATTGACGG	Mancabelli	Lactobacillus	80% Study
0cb1aa5e30815db502ebcfa619fa454e	CAATGGACGCAAGTCTGATGGAGCAACGCCGCGTGAGTGAAGAAGGTTTTCGGATCGTAAAGCTCTGTTGTTGGTGAAGAAGGATAGAGGTAGTAACTGGCCTTTATTTGACGGTAATCAACCAGAAAGT	Mancabelli	Lactobacillus	80% Study
4f462d86e0499b5c08e7b30d1a943162	CAATGGACGCAAGTCTGATGGAGCAACGCCGCGTGAGTGAAGAAGGTCTTCGGATCGTAAAACTCTGTTGTTAGAGAAGAACACGAGTGAGAGTAACTGTTCATTCGATGACGGTATCTAACCAGCAAGT	Mancabelli	Lactobacillus	80% Study
952bf8d5720dc1d6b7f361e74c094338	AGGGAATCTTCCACAATGGGCGCAAGCCTGATGGAGCAACACCGCGTGAGTGAAGAAGGGTTTCGGCTCGTAAAGCTCTGTTGTTGGAGAAGAACGTGCGTGAGAGTAACTGTTCACGCAGTGACGGTAT	Mancabelli	Lactobacillus	80% Study
86a88618546caacca331e5936d8a802c	AGGGAATCTTCCACAATGGACGAAAGTCTGATGGAGCAACGCCGCGTGAGTGAAGAAGGGTTTCGGCTCGTAAAGCTCTGTTGGTAGTGAAGAAAGATAGAGGTAGTAACTGGCCTTTATTTGACGGTAA	Mancabelli	Lactobacillus	80% Study
f5030d0b9a63b2663ad612ebc0c2382d	TACGGGGCGCAGCAGTAGGGAATCTTCCACAATGGACGCAAGTCTGATGGAGCAACGCCGCGTGAGTGAAGAAGGTCTTCGGATCGTAAAACTCTGTTGTTAGAGAAGAACACGAGTGAGAGTAACTGTT	Mancabelli	Lactobacillus	80% Study
b9e07bd9747e47727352f7139c738b6c	TACGGGGGGCAGCAGTAGGGAATCTTCCACAATGGACGCAAGTCTGATGGAGCAACGCCGCGTGAGTGAAGAAGGTCTTCGGATCGTAAAACTCTGTTGTTAGAGAAGAACACGAGTGAGAGTAACTGTT	Mancabelli	Lactobacillus	80% Study
515f5f0a2e89216312a218c25b091de9	TACGGGGGGCAGCAGTAGGGAATCTTCCACAATGGACGCAAGTCTGATGGAGCAACGCCGCGTGAGTGAAGAAGGTTTTCGGATCGTAAAGCTCTGTTGTTGGTGAAGAAGGATAGAGGTAGTAACTGGC	Mancabelli	Lactobacillus	80% Study
e6459b4ee5e7ef1e889ce536234b381a	AGTAGGGAATCTTCCACAATGGGCGCAAGCCTGATGGAGCAACACCGCGTGAGTGAAGAAGGGTTTCGGCTCGTAAAACTCTGTTGTTGGAGAAGAACGTGCGTAAGAGTAACTGTTTACGCAGTGACGG	Mancabelli	Lactobacillus	80% Study
9041f139a1f1707fdd786c6d0995952f	AGCAGGGAATCTTCCACAATGGACGCAAGTCTGATGGAGCAACGCCGCGTGAGTGAAGAAGGTTTTCGGATCGTAAAGCTCTGTTGTTGGTGAAGAAGGATAGAGGTAGTAACTGGCCTTTATTTGACGG	Mancabelli	Lactobacillus	80% Study
309d49f48ef3a547d13627d0779c25fd	AGGGAATCTTCCACAATGGACGCAAGTCTGATGGAGCAACGCCGCGTGAGTGAAGAAGGTCTTCGGATCGTAAAACTCTGTTGTTAGAGAAGAACACGAGTGAGAGTAACTGTTCATTCGATGACGGTAT	Mancabelli	Lactobacillus	80% Study
aa914cc295a8b07ff7e0aee28a1fbd78	AGTAGGGAATCTTCCACAATGGGCGCAAGCCTGATGGAGCAACACCGCGTGAGTGAAGAAGGGTTTCGGCTCGTAAAGCTCTGTTGTTGAAGAAGAATGTGCAAGAGGGTAACTGTTCTTGTATTGACGG	Mancabelli	Lactobacillus	80% Study
8a249948d9b791d2e80e7ce26ed5c7dd	GTAGGGAATCTTCCACAATGGACGCAAGTCTGATGGAGCAACGCCGCGTGAGTGAAGAAGGTTTTCGGATCGTAAAGCTCTGTTGTTGGTGAAGAAGGATAGAGGTAGTAACTGGCCTTTATTTGACGGT	Mancabelli	Lactobacillus	80% Study
5b55244399b29f4ebd3d0fb67d8a65ed	TACGGGAGGCAGCAGTAGGGAATCTTCCACAATGGACGCAAGTCTGATGGAGCAACGCCGCGTGAGTGAAGAAGGTCTTCGGATCGTAAAACTCTGTTGTTAGAGAAGAACACGAGTGAGAGTAACTGTT	Mancabelli	Lactobacillus	80% Study
fdb879447526d3cbcbc19735ee78a7b5	CAATGGGCGCAAGCCTGACCCAGCAACGCCGCGTGAAGGAAGAAGGCCCTCGGGTTGTAAACTTCTTTTGTCAGGGACGAAGCAAGTGACGGTACCTGACGAATAAGCCACGGCTAACTACGTGCCAGCA	Shaufi	Oscillospira	80% Study
82da4148485d6eb448efa10e42ec1d47	CAATGGGCGCAAGCCTGACCCAGCAACGCCGCGTGAAGGAAGAAGGCTTTCGGGTTGTAAACTTCTTTTGTCAGGGAACAGTAGAAGAGGGTACCTGACGAATAAGCCACGGCTAACTACGTGCCAGCAG	Shaufi	Oscillospira	80% Study
d7ff55a70157b9e88fa3cb92636e1cf6	CAATGGGCGAAAGCCTGACCCAGCAACGCCGCGTGAAGGAAGAAGGCTTTCGGGTTGTAAACTTCTTTTATCAGGGACGAAGGATGTGACGGTACCTGATGAATAAGCCACGGCTAACTACGTGCCAGCA	Shaufi	Oscillospira	80% Study
e8848b3dc781ce19d2bd7bce9c4fdd7a	CAATGGGCGCAAGCCTGACCCAGCAACGCCGCGTGAAGGAAGAAGGCTTTCGGGTTGTAAACTTCTTTTGTCAGGGACGAACAAATGACGGTACCTGACGAATAAGCCACGGCTAACTACGTGCCAGCAG	Shaufi	Oscillospira	80% Study
968dfccd3413010d45f277037c37f70f	CAATGGGCGCAAGCCTGACCCAGCAACGCCGCGTGAAGGAAGAAGGCTTTCGGGTTGTAAACTTCTTTTGTCAGGGAACAGTAGAAGAGGGTACCTGACGAATAAGCTCCGGCTAACTACGTGCCAGCAG	Shaufi	Oscillospira	80% Study
f1dc1342e68dbf404ee037deacbe7b93	CAATGGGCGCAAGCCTGACCCAGCAACGCCGCGTGAAGGAAGAAGGCTTTCGGGTTGTAAACTTCTTTTGTCAGGGAAGAGGAGAAGACTGTACCTGACGAATAAGCTCCGGCTAACTACGTGCCAGCAG	Shaufi	Oscillospira	80% Study
fa1815ef7d6a72eb8e6a6060b3960f31	CAATGGGCGCAAGCCTGACCCAGCAACGCCGCGTGAAGGAAGAAGGCTTTCGGGTTGTAAACTTCTTTTATTCGGGACGATAGTGACGGTACCGAATGAATAAGCCACGGCTAACTACGTGCCAGCAGCC	Shaufi	Oscillospira	80% Study
078e7befe5ed38e1d46644bb93805858	CAATGGGCGAAAGCCTGACCCAGCAACGCCGCGTGAAGGAAGAAGGCTTTCGGGTTGTAAACTTCTTTTATCAGGGACGAAGTAGTGACGGTACCTGATGAATAAGCTCCGGCTAACTACGTGCCAGCAG	Shaufi	Oscillospira	80% Study
50c6ad36b44679ed3432f29cae3aeaf9	CAATGGGCGCAAGCCTGACCCAGCAACGCCGCGTGAAGGAAGAAGGCTTTCGGGTTGTAAACTTCTTTTCTTAGGGACGAAGGAAGTGACGGTACCTAAGGAATAAGCTCCGGCTAACTACGTGCCAGCA	Shaufi	Oscillospira	80% Study
883c45fb8e42f84d665cbfe49b27972c	CAATGGGCGCAAGCCTGACCCAGCAACGCCGCGTGAAGGAAGAAGGCTTTCGGGTTGTAAACTTCTTTTCTTGGGGACGAAACAAATGACGGTACCTAAGGAATAAGCTCCGGCTAACTACGTGCCAGCA	Shaufi	Oscillospira	80% Study
833c369f9867ad1ae128212a3f5d3439	CAATGGGCGCAAGCCTGACCCAGCAACGCCGCGTGAAGGAAGAAGGCTTTCGGGTTGTAAACTTCTTTTGTCAGGGAAGATGAAAGAGACTGTACCTGACGAATAAGCCACGGCTAACTACGTGCCAGCA	Shaufi	Oscillospira	80% Study
a2de5a82fbe20bd5a562892b3260b387	CAATGGACGCAAGTCTGACCCAGCAACGCCGCGTGAAGGAAGAAGGCTTTCGGGTTGTAAACTTCTTTTGTCAGGGAACAGTAGAAGAGGGTACCTGACGAATAAGCCACGGCTAACTACGTGCCAGCAG	Shaufi	Oscillospira	80% Study
1039e01fbbd09d024e085c66093311ef	CAATGGGCGCAAGCCTGACCCAGCAACGCCGCGTGAAGGAAGAAGGCTTTCGGGTTGTAAACTTCTTTTATTCGGGACGAAGCAAGTGACGGTACCGAATGAATAAGCCACGGCTAACTACGTGCCAGCA	Shaufi	Oscillospira	80% Study
6013f2d680276a29488635d7857b5d11	CAATGGGCGCAAGCCTGACCCAGCAACGCCGCGTGAAGGAAGAAGGCTTTCGGGTTGTAAACTTCTTTTGTCAGGGAAGATGAACGAGACTGTACCTGACGAATAAGCCACGGCTAACTACGTGCCAGCA	Shaufi	Oscillospira	80% Study
aff10570182dea6c3b6e8affb4c99fc8	CAGCAGTGGGGAATATTGGGCAATGGGCGCAAGCCTGACCCAGCAACGCCGCGTGAAGGAAGAAGGCCCTCGGGTTGTAAACTTCTTTTGTCAGGGACGAAGCAAGTGACGGTACCTGACGAATAAGCCA	Shaufi	Oscillospira	80% Study
8da3cfafc8f8e7c2a5826b4b615c6c01	CAGCAGTGGGGAATATTGGGCAATGGACGCAAGTCTGACCCAGCAACGCCGCGTGAAGGAAGAAGGCTTTCGGGTTGTAAACTTCTTTTGTCAGGGAACAGTAGAAGAGGGTACCTGACGAATAAGCCAC	Shaufi	Oscillospira	80% Study
d439edc4a9960763284c9b3dd33cb88b	CAGCAGTGGGGAATATTGGGCAATGGGCGCAAGCCTGACCCAGCAACGCCGCGTGAAGGAAGAAGGCTTTCGGGTTGTAAACTTCTTTTGTCAGGGAACAGTAGAAGAGGGTACCTGACGAATAAGCTCC	Shaufi	Oscillospira	80% Study
7c9b4eec66cd83f0fb95ef745ccd996a	CAGCAGTGGGGAATATTGGGCAATGGGCGCAAGCCTGACCCAGCAACGCCGCGTGAAGGAAGAAGGCTTTCGGGTTGTAAACTTCTTTTGTCAGGGAACAGTAGAAGAGGGTACCTGACGAATAAGCCAC	Shaufi	Oscillospira	80% Study
2e23f87f385c9f0271cb3851d46a9601	CAGCAGTGGGGAATATTGGGCAATGGGCGCAAGCCTGACCCAGCAACGCCGCGTGAAGGAAGAAGGCTTTCGGGTTGTAAACTTCTTTTGTCAGGGACGAAGACGTGACGGTACCTGACGAATAAGCTCC	Shaufi	Oscillospira	80% Study
b4cd4f89a3ace7fc49ee6dc8fdd5f0aa	CAGCAGTGGGGAATATTGGGCAATGGGCGCAAGCCTGACCCAGCAACGCCGCGTGAAGGAAGAAGGCCCTCGGGTTGTAAACTTCTTTTGACAGGGACGAAGAAAATGACGGTACCTGTCGAATAAGCCA	Shaufi	Oscillospira	80% Study
dd951ca81f6b0c65ebb5de04f28e4395	CAGCAGTGGGGAATATTGGGCAATGGGCGCAAGCCTGACCCAGCAACGCCGCGTGAAGGAAGAAGGCCCTCGGGTTGTAAACTTCTTTTGACAGGGACGAAACAAATGACGGTACCTGTCGAATAAGCCA	Shaufi	Oscillospira	80% Study
7c89c62d10814ce263ac057f8bfe647f	CAGCAGTGGGGAATATTGGGCAATGGGCGCAAGCCTGACCCAGCAACGCCGCGTGAAGGATGAAGGCCCTCGGGTTGTAAACTTCTTTTAACAGGGACGAATTCTGACGGTACCTGTTGAATAAGCCACG	Shaufi	Oscillospira	80% Study
0931cf3beffa8c22d8251b5732ac53cb	CAGCAGTGGGGAATATTGGGCAATGGGCGCAAGCCTGACCCAGCAACGCCGCGTGAAGGAAGAAGGCCCTCGGGTTGTAAACTTCTTTTAACAGGGACGAAGTAAGTGACGGTACCTGTTGAATAAGCCA	Shaufi	Oscillospira	80% Study
d9d23da2285e8ceeffb3aa5ac930a7df	CAGCAGTGGGGAATATTGGGCAATGGGCGCAAGCCTGACCCAGCAACGCCGCGTGAAGGATGAAGGCTTTCGGGTTGTAAACTTCTTTTATCAGGGACGAAGAAAATGACGGTACCTGATGAATAAGCCA	Shaufi	Oscillospira	80% Study
f7c43546096b873f2cc0663560507157	CAGCAGTGGGGAATATTGGGCAATGGGCGCAAGCCTGACCCAGCAACGCCGCGTGAAGGATGAAGGCTTTCGGGTTGTAAACTTCTTTTATTCGGGACGAAGAAAATGACGGTACCGAATGAATAAGCCA	Shaufi	Oscillospira	80% Study
1ca251af6988f81ac1b079f7abbc959c	CAGCAGTGGGGAATATTGGGCAATGGGCGCAAGCCTGACCCAGCAACGCCGCGTGAAGGAAGAAGGCCCTCGGGTTGTAAACTTCTTTTATCAGGGACGAAGCAAGTGACGGTACCTGATGAATAAGCCA	Shaufi	Oscillospira	80% Study
a99a5500255e0d544f2b32a17a97ca96	CAGCAGTGGGGAATATTGGGCAATGGGCGCAAGCCTGACCCAGCAACGCCGCGTGAAGGAAGAAGGCTTTCGGGTTGTAAACTTCTTTTGTCAGGGACGAACAAATGACGGTACCTGACGAATAAGCCAC	Shaufi	Oscillospira	80% Study
8f6c8b50dfc474348bb6d283dee3a062	CAGCAGTGGGGAATATTGGGCAATGGGCGCAAGCCTGACCCAGCAACGCCGCGTGAAGGAAGAAGGCTTTCGGGTTGTAAACTTCTTTTGTCAGGGACGAAGCAAGTGACGGTACCTGACGAATAAGCTC	Shaufi	Oscillospira	80% Study
da19ef6e5183ffae09c845b127fe8c5e	CAGCAGTGGGGAATATTGGGCAATGGGCGCAAGCCTGACCCAGCAACGCCGCGTGAAGGATGAAGGCCCTCGGGTTGTAAACTTCTTTTATTCAGGACGAACAAAATGACGGTACTGAATGAATAAGCCA	Shaufi	Oscillospira	80% Study
1b7b1fb1c8b27d1d143b4060abcb1d98	CAGCAGTGGGGAATATTGGGCAATGGGCGCAAGCCTGACCCAGCAACGCCGCGTGAAGGATGAAGGCTTTCGGGTTGTAAACTTCTTTTATCAGGGACGAACAAAATGACGGTACCTGATGAATAAGCCA	Shaufi	Oscillospira	80% Study
ec1d6111f18b05c4fcf487500f32fb1b	CAGCAGTGGGGAATATTGGGCAATGGGCGCAAGCCTGACCCAGCAACGCCGCGTGAAGGATGAAGGCTTTCGGGTTGTAAACTTCTTTTATTCGGGACGAAACAAATGACGGTACCGAATGAATAAGCCA	Shaufi	Oscillospira	80% Study
66e19c9589e7cb1d70204d6fa93e2d5d	CAGCAGTGGGGAATATTGGGCAATGGGCGCAAGCCTGACCCAGCAACGCCGCGTGAAGGAAGAAGGCTTTCGGGTTGTAAACTTCTTTTCTCAGGGACGAAGGAAGTGACGGTACCTGAGGAACAAGCCA	Shaufi	Oscillospira	80% Study
ee9ea5bff5f23dde725eac10221c24d6	CAGCAGTGGGGAATATTGGGCAATGGGCGCAAGCCTGACCCAGCAACGCCGCGTGAAGGATGAAGGCTCTCGGGTTGTAAACTTCTTTTATTCAGGACGAACAAAATGACGGTACTGAATGAATAAGCCA	Shaufi	Oscillospira	80% Study
3b18f3ee9635668d0126a6b7daf8c75e	CAGCAGTGGGGAATATTGGGCAATGGGCGCAAGCCTGACCCAGCAACGCCGCGTGAAGGATGAAGGCTTTCGGGTTGTAAACTTCTTTTAACAGGGACGAATAAAGTGACGGTACCTGTTGAATAAGCCA	Shaufi	Oscillospira	80% Study
2d6bc2bcf5c2414b2e041536ab8efd6e	CAGCAGTGGGGAATATTGGGCAATGGGCGCAAGCCTGACCCAGCAACGCCGCGTGAAGGAAGAAGGCTTTCGGGTTGTAAACTTCTTTTATCAGGGACGAAGGAATGACGGTACCTGATGAATAAGCCAC	Shaufi	Oscillospira	80% Study
d7754ae7b71baca27340b4d5ad71a21c	CAGCAGTGGGGAATATTGGGCAATGGGCGCAAGCCTGACCCAGCAACGCCGCGTGAAGGAAGAAGGCCCTCGGGTTGTAAACTTCTTTTCTTAGGGACGAAGCAAGTGACGGTACCTAAGGAATAAGCCA	Shaufi	Oscillospira	80% Study
1bb0572e47b034fba13a51ee33f7ef68	CAGCAGTGGGGAATATTGGGCAATGGGCGCAAGCCTGACCCAGCAACGCCGCGTGAAGGAAGAAGGCTTTCGGGTTGTAAACTTCTTTTAACAGGGACGAAATAAATGACGGTACCTGTTGAATAAGCCA	Shaufi	Oscillospira	80% Study
17128081aeb8b819809d26981ffe794e	CAGCAGTGGGGAATATTGGGCAATGGGCGCAAGCCTGACCCAGCAACGCCGCGTGAAGGATGAAGGCTTTCGGGTTGTAAACTTCTTTTATCAGGGACGAAATAAATGACGGTACCTGATGAATAAGCCA	Shaufi	Oscillospira	80% Study
b47aee99a3115f905ce4c7a4f1548ce0	CAGCAGTGGGGAATATTGGGCAATGGGCGCAAGCCTGACCCAGCAACGCCGCGTGAAGGAAGAAGGCTTTCGGGTTGTAAACTTCTTTTCTCAGGGACGAAACAAATGACGGTACCTGAGGAATAAGCCA	Shaufi	Oscillospira	80% Study
f78a165f7db6990da9914909cb975b79	CAGCAGTGGGGAATATTGGGCAATGGGCGCAAGCCTGACCCAGCAACGCCGCGTGAAGGAAGAAGGCTCTCGGGTTGTAAACTTCTTTTGACAGGGACGAAACAAATGACGGTACCTGTCGAATAAGCTC	Shaufi	Oscillospira	80% Study
6bd60e45dd4cad02771ad90aaaf8ee41	CAGCAGTGGGGAATATTGGGCAATGGGCGCAAGCCTGACCCAGCAACGCCGCGTGAAGGAAGAAGGCCCTCGGGTTGTAAACTTCTTTTGTCAGGGACGAACAGATGACGGTACCTGACGAATAAGCTCC	Shaufi	Oscillospira	80% Study
572992aa5e8a99d87c819b7fa5971afa	CAGCAGTGGGGAATATTGGGCAATGGGCGCAAGCCTGACCCAGCAACGCCGCGTGAAGGAAGAAGGCTTTCGGGTTGTAAACTTCTTTTATCAGGGAAGATGGATGAGACTGTACCTGATGAATAAGCCA	Shaufi	Oscillospira	80% Study
0e30efc741656705e4bc5bb487256a68	CAGCAGTGGGGAATATTGGGCAATGGGCGCAAGCCTGACCCAGCAACGCCGCGTGAAGGAAGAAGGCTTTCGGGTTGTAAACTTCTTTTCTTGAGGACGAAGAAGTGACGGTACTCAAGGAATAAGCTCC	Shaufi	Oscillospira	80% Study
3d88347351f1b7aa3da450fae117ab61	CAGCAGTGGGGAATATTGGGCAATGGGCGCAAGCCTGACCCAGCAACGCCGCGTGAAGGAAGAAGGCTTTCGGGTTGTAAACTTCTTTTATTCGGGACGAAGAAATGACGGTACCGAATGAATAAGCCAC	Shaufi	Oscillospira	80% Study
255d7f2738b19ce5b82b38adae46bd7d	CAGCAGTGGGGAATATTGGGCAATGGGCGCAAGCCTGACCCAGCAACGCCGCGTGAAGGAAGAAGGCTTTCGGGTTGTAAACTTCTTTTATTAAGGACGAAGCAATGACGGTACTTAATGAATAAGCTCC	Shaufi	Oscillospira	80% Study
80be92d011b1c687ebc7764f18bc769e	CAGCAGTGGGGAATATTGGGCAATGGGCGAAAGCCTGACCCAGCAACGCCGCGTGAAGGAAGAAGGCTTTCGGGTTGTAAACTTCTTTTATCAGGGACGAAGTAGTGACGGTACCTGATGAATAAGCTCC	Shaufi	Oscillospira	80% Study
229d34ee5a043bfcc33f50e63ff4fce4	CAGCAGTGGGGAATATTGGGCAATGGGCGCAAGCCTGACCCAGCAACGCCGCGTGAAGGAAGAAGGCTTTCGGGTTGTAAACTTCTTTTGTCGGGGACGAAACAAATGACGGTACCCGACGAATAAGCCA	Shaufi	Oscillospira	80% Study
24ea4d9eba4fdfdc5a8892447666f971	CAGCAGTGGGGAATATTGGGCAATGGGCGCAAGCCTGACCCAGCAACGCCGCGTGAAGGAAGAAGGCCCTCGGGTTGTAAACTTCTTTTGTCAGGGACGAATCAAGTGACGGTACCTGACGAATAAGCCA	Shaufi	Oscillospira	80% Study
d8ebb54d66addb283a015f32fb11b743	CAGCAGTGGGGAATATTGGGCAATGGGCGCAAGCCTGACCCAGCAACGCCGCGTGAAGGAAGAAGGCTCTCGGGTTGTAAACTTCTTTTAAGAGGGACGAAACAAATGACGGTACCTCTTGAATAAGCCA	Shaufi	Oscillospira	80% Study
d82d2db0d50f0192476f56ae9fbb9311	CAGCAGTGGGGAATATTGGGCAATGGGCGCAAGCCTGACCCAGCAACGCCGCGTGAAGGAAGAAGGCTTTCGGGTTGTAAACTTCTTTTAACAGGGACGAAGTAAGTGACGGTACCTGTTGAATAAGCCA	Shaufi	Oscillospira	80% Study
2c5461d36ac8b2da6f234ca25102d354	CAGCAGTGGGGAATATTGGGCAATGGGCGCAAGCCTGACCCAGCAACGCCGCGTGAAGGAAGAAGGCTTTCGGGTTGTAAACTTCTTTTATCAGGGACGAAATAAATGACGGTACCTGATGAATAAGCCA	Shaufi	Oscillospira	80% Study
4b3d1ccc9a359f3b293f421924acd7f4	CAGCAGTGGGGAATATTGGGCAATGGGCGCAAGCCTGACCCAGCAACGCCGCGTGAAGGAAGAAGGCTTTCGGGTTGTAAACTTCTTTTAAGAGGGACGAAGGAAGTGACGGTACCTCTTGAATAAGCTC	Shaufi	Oscillospira	80% Study
6ddf1ea189c82463c35de8024f3268c5	CAGCAGTGGGGAATATTGGGCAATGGGCGCAAGCCTGACCCAGCAACGCCGCGTGAAGGAAGAAGGCCCTCGGGTTGTAAACTTCTTTTGTCAGGGACGAAGAGATGACGGTACCTGACGAATAAGCTCC	Shaufi	Oscillospira	80% Study
1a988e388a0f6620d736b16ca5d45e8d	CAGCAGTGGGGAATATTGGGCAATGGGCGCAAGCCTGACCCAGCAACGCCGCGTGAAGGAAGAATGCTTTCGGGTTGTAAACTTCTTTTGTCGGGGACGAAACAAATGACGGTACCTGACGAATAAGCCA	Shaufi	Oscillospira	80% Study
c89db07613cf5b58202061233bb8a9ad	CAGCAGTGGGGAATATTGGGCAATGGGCGCAAGCCTGACCCAGCAACGCCGCGTGAAGGAAGAAGGCTTTCGGGTTGTAAACTTCTTTTGTCAGGGACGAAACAAATGACGGTACCTGACGAATAAGCCA	Shaufi	Oscillospira	80% Study
b093133b4a1727c38e811752449a64a4	CAGCAGTGGGGAATATTGGGCAATGGGCGCAAGCCTGACCCAGCAACGCCGCGTGAAGGAAGAAGGCCCTCGGGTTGTAAACTTCTTTTAACAGGGACGAAGGAAGTGACGGTACCTGTTGAATAAGCCA	Shaufi	Oscillospira	80% Study
40a361c11f6f1874e504a054fbb5b740	CAGCAGTGGGGAATATTGGGCAATGGGCGCAAGCCTGACCCAGCAACGCCGCGTGAAGGAAGAAGGCTTTCGGGTTGTAAACTTCTTTTCTCGGGGACGAAACAAATGACGGTACCTGAGGAATAAGCCA	Shaufi	Oscillospira	80% Study
5f18d6e21a3566467f9b27e57e6aeab5	CAGCAGTGGGGAATATTGGGCAATGGGCGAAAGCCTGACCCAGCAACGCCGCGTGAAGGAAGAAGGCTTTCGGGTTGTAAACTTCTTTTATCAGGGACGAAGGATGTGACGGTACCTGATGAATAAGCCA	Shaufi	Oscillospira	80% Study
d8f6167183d25ad570123db146c339a6	CAGCAGTGGGGAATATTGGGCAATGGGCGCAAGCCTGACCCAGCAACGCCGCGTGAAGGATGAAGGCTTTCGGGTTGTAAACTTCTTTTATCAGGGACGAAACAAATGACGGTACCTGATGAATAAGCCA	Shaufi	Oscillospira	80% Study
87a4c9b06ebb4d914d0a3a6fac7aefa4	AGCAGTGGGGAATATTGGGCAATGGGCGCAAGCCTGACCCAGCAACGCCGCGTGAAGGAAGAAGGCTTTCGGGTTGTAAACTTCTTTTGTCAGGGAACAGTAGAAGAGGGTACCTGACGAATAAGCTCCG	Shaufi	Oscillospira	80% Study
14bc288b6046c262d5a63a2259f16d34	CAGCAGTGGGGAATATTGGGCAATGGGCGCAAGCCTGACCCAGCAATGCCGCGTGAAGGAAGAAGGCTTTCGGGTTGTAAACTTCTTTTGTCAGGGAAGAGAAGAAGACGGTACCTGACGAATAAGCCAC	Shaufi	Oscillospira	80% Study
bb821c1d2404e64f8ae85587fb99daf8	CAGCAGTGGGGAATATTGGGCAATGGACGCAAGTCTGACCCAGCAACGCCGCGTGAAGGAAGAAGGCTTTCGGGTTGTAAACTTCTTTTGTCAGGGAAGAGCAGAAGACGGTACCTGACGAATAAGCCAC	Shaufi	Oscillospira	80% Study
31b78f21b6f690a22af0be482ebf4630	AGCAGTGGGGAATATTGGGCAATGGGCGCAAGCCTGACCCAGCAACGCCGCGTGAAGGAAGAAGGCTTTCGGGTTGTAAACTTCTTTTGTCAGGGAACAGTAGAAGAGGGTACCTGACGAATAAGCCACG	Shaufi	Oscillospira	80% Study
8e0074399a37f25d5c4487899788b8cc	CAGCAGTGGGGAATATTGGGCAATGGACGCAAGTCTGACCCAGCAACGCCGCGTGAAGGAAGAAGGCTTTCGGGTTGTAAACTTCTTTTAAGAGGGAACAGGAGAAGAGGGTACCTCTTGAATAAGCCAC	Shaufi	Oscillospira	80% Study
a79ad1bad44a2c5a698cdf368b759c63	AGCAGTGGGGAATATTGGGCAATGGACGCAAGTCTGACCCAGCAACGCCGCGTGAAGGAAGAAGGCTTTCGGGTTGTAAACTTCTTTTGTCAGGGAACAGTAGAAGAGGGTACCTGACGAATAAGCCACG	Shaufi	Oscillospira	80% Study
10bb1c5c70ef54e588b334c406d2f95b	CAGCAGTGGGGAATATTGGGCAATGGGCGAAAGCCTGACCCAGCAACGCCGCGTGAAGGAAGAAGGCCCTCGGGTTGTAAACTTCTTTTACCAGGGACGAAGGAAGTGACGGTACCTGGAGAAAAAGCTC	Shaufi	Oscillospira	80% Study
5c51a15404a8799459798386a3d7528c	CAGCAGTGGGGAATATTGGGCAATGGGCGCAAGCCTGACCCAGCAACGCCGCGTGAAGGAAGAAGGCTTTCGGGTTGTAAACTTCTTTTATTAAGGACGAAACAAATGACGGTACTTAATGAATAAGCTC	Shaufi	Oscillospira	80% Study
36385ed14c61d0baaedce22b0eb8949b	CAGCAGTGGGGAATATTGGGCAATGGGCGCAAGCCTGACCCAGCAATGCCGCGTGAAGGAAGAAGGCTTTCGGGTTGTAAACTTCTTTGACGAGGGAAGAGTAGAAGACGGTACCTCGAAAACAAGCCAC	Shaufi	Oscillospira	80% Study
5386219b549efc36e26fba07a28f119a	AGCAGTGGGGAATATTGGGCAATGGGCGCAAGCCTGACCCAGCAACGCCGCGTGAAGGAAGAAGGCTTTCGGGTTGTAAACTTCTTTTGTCAGGGACGAAGACGTGACGGTACCTGACGAATAAGCTCCG	Shaufi	Oscillospira	80% Study
400360c9165bcd025c07a939f72e62c9	CAATGGGCGAGAGCCTGAACCAGCCAAGTAGCGTGAAGGATGACTGCCCTACGGGTTGTAAACTTCTTTTATAAGGGAATAAAGTATTCTACGTGTAGAGTTTTGTATGTACCTTATGAATAAGCATCGG	Shaufi	Bacteroides	80% Study
e7c65418afc8909cb84084ffe91d55d3	CAATGGGCGAGAGCCTGAACCAGCCAAGTAGCGTGAAGGATGACTGCCCTACGGGTTGTAAACTTCTTTTATAAGGGAATAAAGTTCTCTACGTGTAGAGTTTTGTATGTACCTTATGAATAAGCATCGG	Shaufi	Bacteroides	80% Study
4eed35f3dafbcb34876fa75c83e91d96	CAATGGACGAGAGTCTGAACCAGCCAAGTAGCGTGAAGGATGAAGGTCCTACGGATTGTAAACTTCTTTTATAAGGGAATAAACCCTCCCACGTGTGGGAGCTTGTATGTACCTTATGAATAAGCATCGG	Shaufi	Bacteroides	80% Study
1bf62f2fbff25cd3ac158e2d065339b7	CAATGGGCGAGAGCCTGAACCAGCCAAGTAGCGTGAAGGATGACTGCCCTATGGGTTGTAAACTTCTTTTATACGGGAATAACACCTTCCACGTGTGGAGGGCTGCATGTACCGTATGAATAAGCATCGG	Shaufi	Bacteroides	80% Study
1558cc9de8364d8d57288078190b78b1	CAATGGGCGAGAGCCTGAACCAGCCAAGTAGCGTGAAGGATGACTGCCCTATGGGTTGTAAACTTCTTTTATACGGGAATAACACGCGGCACGTGTGCCGCTCTGCATGTACCGTATGAATAAGCATCGG	Shaufi	Bacteroides	80% Study
522b3bb04a687c8e9f1687f703d9f0e5	CAATGGGCGAGAGCCTGAACCAGCCAAGTAGCGTGAAGGATGACGGCCCTACGGGTTGTAAACTTCTTTTGTGCGGGAATAAAGGAGCCTACGTGTAGGCTTTTGCATGTACCGTAACGAATAAGCATCG	Shaufi	Bacteroides	80% Study
327ae0ddb5399f2a8bf13f2b68ce036d	CAATGGGCGAGAGCCTGAACCAGCCAAGTAGCGTGAAGGATGACTGCCCTATGGGTTGTAAACTTCTTTTATACGGGAATAACATCATCCACGTGTGGGTGTCTGCATGTACCGTATGAATAAGCATCGG	Shaufi	Bacteroides	80% Study
65e95f1b3eca715843c916386580164d	CAATGGGCGAGAGCCTGAACCAGCCAAGTAGCGTGAAGGAAGACTGCCCTATGGGTTGTAAACTTCTTTTATACGGGAATAAAGTCATCCACGTGTGGATGTTTGTATGTACCGTATGAATAAGGATCGG	Shaufi	Bacteroides	80% Study
f5aec87f6388c3f0d59bbef91c443ccb	CAATGGACGAGAGTCTGAACCAGCCAAGTAGCGTGAAGGATGAAGGTCCTACGGATTGTAAACTTCTTTTATAAGGGAATAAAACCTTCCACGTGTGGGAGCTTGTATGTACCTTATGAATAAGCATCGG	Shaufi	Bacteroides	80% Study
01e8756bd32a90dfcdd18a01e771510c	CAATGGACGAGAGTCTGAACCAGCCAAGTAGCGTGAAGGACGACTGCCCTATGGGTTGTAAACTTCTTTTATATGGGAATAAAAAAGTCCACGTGTGGATTCTTGTATGTACCATATGAATAAGCATCGG	Shaufi	Bacteroides	80% Study
d6aac64a3ef144643b0b98b1948454a1	CAGCAGTGAGGAATATTGGTCAATGGGCGCGAGCCTGAACCAGCCAAGTAGCGTGAAGGATGACTGCCCTATGGGTTGTAAACTTCTTTTATATTAGAATAAAGTGCAGTATGTATACTGTTTTGTATGT	Shaufi	Bacteroides	80% Study
62c8eecd85ece6a1ed49aa5d893e7325	CAGCAGTGAGGAATATTGGTCAATGGACGAGAGTCTGAACCAGCCAAGTAGCGTGAAGGATGACTGCCCTATGGGTTGTAAACTTCTTTTATATGGGAATAAAGTATTCCACGTGTGGGATTTTGTATGT	Shaufi	Bacteroides	80% Study
5cd1db9855801c24ad1e34871270f250	CAGCAGTGAGGAATATTGGTCAATGGACGAGAGTCTGAACCAGCCAAGTAGCGTGAAGGATGACTGCCCTATGGGTTGTAAACTTCTTTTATATGGGAATAAAGTATTCCACGTGTGGAATTTTGTATGT	Shaufi	Bacteroides	80% Study
15db2b05c9482c54c226a092e7f9b9d8	CAGCAGTGAGGAATATTGGTCAATGGACGGGAGTCTGAACCAGCCAAGTAGCGTGAAGGATGACTGCCCTATGGGTTGTAAACTTCTTTTATATGGGAATAAAGTTTTCCACGTGTGGAATTTTGTATGT	Shaufi	Bacteroides	80% Study
1f3d4521ece1a832be06ae910de677b5	CAGCAGTGAGGAATATTGGTCAATGGGCGAGAGCCTGAACCAGCCAAGTAGCGTGAGGGATGAAGGCTCTATGGGTCGTAAACCTCTTTTATATGGGAATAAAGTTTTCCACGTGTGGAATTTTGTATGT	Shaufi	Bacteroides	80% Study
eb49391f73dcbd69f62b321043b47d75	CAGCAGTGAGGAATATTGGTCAATGGACGAGAGTCTGAACCAGCCAAGTAGCGTGAAGGATGACTGCCCTATGGGTTGTAAACTTCTTTTATATGGGAATAAAGTTTTCCACGTGTGGAATTTTGTATGT	Shaufi	Bacteroides	80% Study
9df4ff28afdfdfc93d665c98e0d485d6	CAGCAGTGAGGAATATTGGTCAATGGGCGATGGCCTGAACCAGCCAAGTAGCGTGAAGGATGACTGCCCTATGGGTTGTAAACTTCTTTTATAAAGGAATAAAGTCGGGTATGCATACCCGTTTGCATGT	Shaufi	Bacteroides	80% Study
786cb1d85025548e6cbe8e567160d5c9	CAGCAGTGAGGAATATTGGTCAATGGACGAGAGTCTGAACCAGCCAAGTAGCGTGAAGGATGACTGCCCTATGGGTTGTAAACTTCTTTTATACGGGAATAAAGTGAGGCACGTGTGCCTTTTTGTATGT	Shaufi	Bacteroides	80% Study
8d17b78d8f2e4721945dd9c183d10e73	CAGCAGTGAGGAATATTGGTCAATGGGCGCGAGCCTGAACCAGCCAAGTAGCGTGAAGGATGACTGCCCTACGGGTTGTAAACTTCTTTTATAAAGGAATAAAGTGAGGCACGTGTGCCTTTTTGTATGT	Shaufi	Bacteroides	80% Study
e216ed20e5f9edb8fca7690e553ef0dc	CAATGGGGGAAACCCTGATGCAGCGACGCCGCGTGAGTGAAGAAGTATTTCGGTATGTAAAGCTCTATCAGCAGGGAAGAAGATGACGGTACCTGAGTAAGAAGCCCCGGCTAACTACGTGCCAGCAGCC	Shaufi	Moryella	80% Study
763e48e1ccf80b208bd286e836b9fe19	CAGCAGTGGGGAATATTGCACAATGGGGGAAACCCTGATGCAGCGACGCCGCGTGAGTGAAGAAGTATTTCGGTATGTAAAGCTCTATCAGCAGGGAAGAAGATGACGGTACCTGAGTAAGAAGCCCCGG	Shaufi	Moryella	80% Study
9a412458a6dc5697a88c3cb511c15d74	CAATGGGGGAAACCCTGATGCAGCGACGCCGCGTGGAGGAAGAAGGTCTTCGGATTGTAAACTCCTGTTGTTGGGGAAAAGAAGGATGGTACCCAACAAGGAAGTGACGGCTAACTACGTGCCAGCAGCC	Shaufi	Faecalibacterium	80% Study
ac4bf7183c04f14dfe5ff5b33f9e199a	CAATGGGGGAAACCCTGATGCAGCGACGCCGCGTGGAGGAAGAAGGTCTTCGGATTGTAAACTCCTGTTGTTGAGGAAAAAGAGGATGGTACTCAACAAGGAAGTGACGGCTAACTACGTGCCAGCAGCC	Shaufi	Faecalibacterium	80% Study
4f363419a78a771969b7790a4691fc16	CAATGGGGGAAACCCTGATGCAGCGACGCCGCGTGGAGGAAGAAGGTCTTCGGATTGTAAACTCCTGTTGTTGGGGAAAAAGAGGATGGTACCCAACAAGGAAGTGACGGCTAACTACGTGCCAGCAGCC	Shaufi	Faecalibacterium	80% Study
e6bcd8f4829b152d627a995ffd86a674	CAGCAGTGGGGAATATTGCACAATGGGGGAAACCCTGATGCAGCGACGCCGCGTGGAGGAAGAAGGTCTTCGGATTGTAAACTCCTGTTGTTGGGGAAAAGAAGGATGGTACCCAACAAGGAAGTGACGG	Shaufi	Faecalibacterium	80% Study
85e3a3fa3c50cd1243cdddbfe32f898d	CAGCAGTGGGGAATATTGCACAATGGGGGAAACCCTGATGCAGCGACGCCGCGTGGAGGAAGAAGGTCTTCGGATTGTAAACTCCTGTTGTTGAGGAAGAAAAGGACGGTACTCAACAAGGAAGTGACGG	Shaufi	Faecalibacterium	80% Study
220da43683802dc85928764b46b2ccf1	CAGCAGTGAGGAATATTGGTCAATGGACGCAAGTCTGAACCAGCCATGCCGCGTGCAGGAAGACGGCTCTATGAGTTGTAAACTGCTTTTGTACTAGGGTAAACGCTTCTACGTGTAGGAGCCTGAAAGT	Shaufi	Alistipes	80% Study
6612e1969dd109fe2edc70b5f9e09f1d	CAGCAGTGAGGAATATTGGTCAATGGACGCAAGTCTGAACCAGCCATGCCGCGTGCAGGATGAAGGTGCTATGCATTGTAAACTGCTTTTGTACGAGGGTAAATGCAGGTACGTGTACCTGTTTGAAAGT	Shaufi	Alistipes	80% Study
3595b017273b3640f42db8dbe4b39c2a	CAATGGCCGGAAGGCTGAACCAGCCAAGTCGCGTGAAGGAAGAAGGATCTATGGTTTGTAAACTTCTTTTGTACGGGGGTAAAATGAGGGACGTGTCCCTTATTGCAAGTACCGTACGAATAAGCATCGG	Shaufi	Parabacteroides	80% Study
66ee0f839238ea1d792f7aee45ac523d	CAATGGCCGGAAGGCTGAACCAGCCAAGTCGCGTGGAGGAAGAAGGATCTATGGTTTGTAAACTTCTTTTGTGCGGGGGTAAAGGTCGGTATGTATACCGCATTGAAAGTACCGCACGAATAAGCATCGG	Shaufi	Parabacteroides	80% Study
fe2c2e4b70e1414b57c4fb6b688913c8	CAATGGCCGGAAGGCTGAACCAGCCAAGTCGCGTGGAGGAAGAAGGATCTATGGTTTGTAAACTTCTTTTGTGCGGGGGTAAAGGTCGGTACGTGTACCGATTTGCAAGTACCGCACGAATAAGCATCGG	Shaufi	Parabacteroides	80% Study
e04420ebf0a5e9c063cce460dcc2f2cf	CAATGGCCGGAAGGCTGAACCAGCCAAGTCGCGTGAAGGAAGAAGGATCTATGGTTTGTAAACTTCTTTTGTACGGGGGTAAAGAGAGGGACGTGTCCCTTATTGCAAGTACCGTACGAATAAGCATCGG	Shaufi	Parabacteroides	80% Study
b0a0d839d0be0a913f62c22c69d7bff4	CAATGGCCGGAAGGCTGAACCAGCCAAGTCGCGTGGAGGAAGAAGGATCTATGGTTTGTAAACTTCTTTTGTGCGGGGGTAAAGGGCGGTATGTATACCGCATTGAAAGTACCGCACGAATAAGCATCGG	Shaufi	Parabacteroides	80% Study
48910a78fe2232b26c346965f3915b81	CAATGGCCGGAAGGCTGAACCAGCCAAGTCGCGTGAAGGATGAAGGATCTATGGTTTGTAAACTTCTTTTGTACGGGGGTAAAGTGAGGGACGCGTCCCTTATTGCAAGTACCGTACGAATAAGCATCGG	Shaufi	Parabacteroides	80% Study
9e10e76bac156fda93f968e5cd9f295a	CAATGGCCGGAAGGCTGAACCAGCCAAGTCGCGTGGAGGAAGAAGGATCTATGGTTTGTAAACTTCTTTTGTGCGGGGGTAAAGGTCGGTACGCGTACCGATTTGCAAGTACCGCACGAATAAGCATCGG	Shaufi	Parabacteroides	80% Study
e0a8d4acbcd404dad643c81d8c40e1d0	CAATGGCCGTAAGGCTGAACCAGCCAAGTCGCGTGAAGGAAGAAGGATCTATGGTTTGTAAACTTCTTTTGTACGGGGGTAAAGTGAAGGACGTGTCCTTTATTGCAAGTACCGTACGAATAAGCATCGG	Shaufi	Parabacteroides	80% Study
1043d114079f0d7b9982c43421680b37	CAATGGGCGATAGCCTGAACCAGCCAAGTCGCGTGAGGGATGAAGGCCCTACGGGTCGTAAACCTCTTTTATAAGGGAATAAAGTGTGGGACGTGTCCCATTTTGTATGTACCTTATGAATAAGCATCGG	Shaufi	Parabacteroides	80% Study
12d978e525932ba3c01a6cb566b22bf2	CAATGGCCGGAAGGCTGAACCAGCCAAGTCGCGTGAAGGATGAAGGATCTATGGTTTGTAAACTTCTTTTGTACGGGGGTAAAGTGAGGGACGTGTCCCTTATTGCAAGTACCGTACGAATAAGCATCGG	Shaufi	Parabacteroides	80% Study
491b0fc811add9f97d32b9959367fa67	CAATGGCCGAGAGGCTGAACCAGCCAAGTCGCGTGAAGGAAGAAGGATCTATGGTTTGTAAACTTCTTTTATACGGGAATAAAGTGTGGAACGTGTTCCATTTTGTATGTACCGTATGAATAAGCATCGG	Shaufi	Parabacteroides	80% Study
caacc0cc7c3c466363f1cb7c286cbeac	CAGCAGTGAGGAATATTGGTCAATGGGCGTAAGCCTGAACCAGCCAAGTCGCGTGAGGGATGAAGGTTCTATGGATCGTAAACCTCTTTTATAAGGGAATAAAGTGTGGGACGTGTCCTATTTTGTATGT	Shaufi	Parabacteroides	80% Study
17349d888dbb55625fb3564327303072	CAGCAGTGAGGAATATTGGTCAATGGGCGTAAGCCTGAACCAGCCAAGTCGCGTGAGGGATGAAGGTTCTATGGATCGTAAACCTCTTTTATAAGGGAATAAAGTGCGGGACGTGTCCCGTTTTGTATGT	Shaufi	Parabacteroides	80% Study
3302cb8216eaaf76b392a9a40295bbc4	CAGCAGTGAGGAATATTGGTCAATGGGCGTAAGCCTGAACCAGCCAAGTCGCGTGAGGGATGAAGGTTCTATGGATCGTAAACCTCTTTTATAAGGGAATAAAGTGTGGGACGTGTCCTGTTTTGTATGT	Shaufi	Parabacteroides	80% Study
2cfbace58434fd1d0cce70a5ee72abc7	CAGCAGTGAGGAATATTGGTCAATGGGCGAGAGCCTGAACCAGCCAAGTCGCGTGAAGGATGAAGGATCTATGGTTCGTAAACTTCTTTTATAAGGGAATAAAGTGCGCCACGTGTGGTGTTTTGTATGT	Shaufi	Parabacteroides	80% Study
1343237002f1071f152f6f70903f3584	CAGCAGTGGGGAATATTGCGCAATGGGGGCAACCCTGACGCAGCAACGCCGCGTGATTGAAGAAGGCCTTCGGGTTGTAAAGATCTTTAATCAGGGACGAAACATGACGGTACCTGAAGAATAAGCTCCG	Shaufi	Butyricicoccus	80% Study
09e49c420f6419f4c680392061c39163	CAGCAGTGGGGAATATTGCGCAATGGGGGCAACCCTGACGCAGCAACGCCGCGTGATTGATGAAGGTCTTCGGATTGTAAAAATCTTTAATCAGGGACGAAACAAATGACGGTACCTGAAGAATAAGCTC	Shaufi	Butyricicoccus	80% Study
ca4cbf10c2261988828e57a63285fe1d	CAGCAGTGGGGAATATTGCGCAATGGGGGCAACCCTGACGCAGCAACGCCGCGTGATTGAAGAAGGTCTTCGGATTGTAAAAATCTTTAATCAGGGACGAAGAAAATGACGGTACCTGAAGAATAAGCTC	Shaufi	Butyricicoccus	80% Study
ef3881dd3ec2d26ef55f91cac17cdab6	CAATGGAGGAAACTCTGATGCAGCGACGCCGCGTGAGGGAAGACGGTCTTCGGATTGTAAACCTCTGTCTTTAGGGACGAAAAAATGACGGTACCTAAGGAGGAAGCCACGGCTAACTACGTGCCAGCAG	Shaufi	Ethanoligenens	80% Study
e7f72649f928150e1ee276dd2f7a5c5d	CAGCAGTGGGGGATATTGCACAATGGAGGAAACTCTGATGCAGCGACGCCGCGTGAGGGAAGACGGTCTTCGGATTGTAAACCTCTGTCTTTAGGGACGAAAAAATGACGGTACCTAAGGAGGAAGCCAC	Shaufi	Ethanoligenens	80% Study
2b97bb1f9528a0296f8c0fe9f9f99585	CAGCAGTGGGGGATATTGCACAATGGAGGGAACTCTGATGCAGCGACGCCGCGTGAGGGAAGACGGTCTTCGGATTGTAAACCTCTGTCTTTAGGGACGAAAAAATGACGGTACCTAAGGAGGAAGCCAC	Shaufi	Ethanoligenens	80% Study
7ad07ad4a1974574d7afdb913df80663	CAGCAGTGGGGGATATTGCACAATGGAGGAAACTCTGATGCAGCGACGCCGCGTGAGGGAAGACGGTCTTCGGATTGTAAACCTCTGTCTTTAGGGACGAAAAAAATGACGGTACCTAAGGAGGAAGCCA	Shaufi	Ethanoligenens	80% Study
0cb1aa5e30815db502ebcfa619fa454e	CAATGGACGCAAGTCTGATGGAGCAACGCCGCGTGAGTGAAGAAGGTTTTCGGATCGTAAAGCTCTGTTGTTGGTGAAGAAGGATAGAGGTAGTAACTGGCCTTTATTTGACGGTAATCAACCAGAAAGT	Shaufi	Lactobacillus	80% Study
4f462d86e0499b5c08e7b30d1a943162	CAATGGACGCAAGTCTGATGGAGCAACGCCGCGTGAGTGAAGAAGGTCTTCGGATCGTAAAACTCTGTTGTTAGAGAAGAACACGAGTGAGAGTAACTGTTCATTCGATGACGGTATCTAACCAGCAAGT	Shaufi	Lactobacillus	80% Study
92b68ec7f15be91061c8ab27d1148d92	CAGCAGTAGGGAATCTTCCACAATGGACGCAAGTCTGATGGAGCAACGCCGCGTGAGTGAAGAAGGTTTTCGGATCGTAAAGCTCTGTTGTTGGTGAAGAAGGATAGAGGTAGTAACTGGCCTTTATTTG	Shaufi	Lactobacillus	80% Study
9ef5f69f771454825f7ee4f39e23d5ed	CAGCAGTAGGGAATCTTCCACAATGGACGCAAGTCTGATGGAGCAACGCCGCGTGAGTGAAGAAGGTCTTCGGATCGTAAAACTCTGTTGTTAGAGAAGAACACGAGTGAGAGTAACTGTTCATTCGATG	Shaufi	Lactobacillus	80% Study
d42610c19861060b0471420f23d05fcc	CAGCAGTAGGGAATCTTCCACAATGGGCGCAAGCCTGATGGAGCAACACCGCGTGAGTGAAGAAGGGTTTCGGCTCGTAAAGCTCTGTTGTTGGAGAAGAACGTGCGTGAGAGTAACTGTTCACGCAGTG	Shaufi	Lactobacillus	80% Study
66748b074ef7f8d518572bf61f0e798e	CAGCAGTAGGGAATCTTCCACAATGGACGAAAGTCTGATGGAGCAACGCCGCGTGAGTGAAGAAGGGTTTCGGCTCGTAAAGCTCTGTTGGTAGTGAAGAAAGATAGAGGTAGTAACTGGCCTTTATTTG	Shaufi	Lactobacillus	80% Study
6001373e2e33930770076200103f0340	CAGCAGTAGGGAATCTTCCACAATGGGCGCAAGCCTGATGGAGCAACACCGCGTGAGTGAAGAAGGGTTTCGGCTCGTAAAGCTCTGTTGTTGAAGAAGAATGTGCAAGAGAGTAACTGTTCTTGTATTG	Shaufi	Lactobacillus	80% Study
f4ac4e584f7e483fef9bc7eeaf1cfcb5	CAGCAGTAGGGAATCTTCCACAATGGGCGCAAGCCTGATGGAGCAACACCGCGTGAGTGAAGAAGGGTTTCGGCTCGTAAAGCTCTGTTGTTGGAGAAGAACATGCGTGAGAGTAACTGTTCACGCAGTG	Shaufi	Lactobacillus	80% Study
99c47ad81672587dd11b49ed4ded4ac5	CAGCAGTAGGGAATCTTCCACAATGGGCGCAAGCCTGATGGAGCAACACCGCGTGAGTGAAGAAGGGTTTCGGCTCGTAAAACTCTGTTGTTGGAGAAGAACGTGCGTAAGAGTAACTGTTTACGCAGTG	Shaufi	Lactobacillus	80% Study
0211b4ca7f53205891c49ade94d36d94	CAATGGGGGAAACCCTGAACCAGCAACGCCGCGTGAGGGAAGACGGTTTTCGGATTGTAAACCTCTGTCCTCTGTGAAAATGATGATGGTAGCAGAGGAGGAAGCTCCGGCTAACTACGTGCCAGCAGCC	Shaufi	Ruminococcus	80% Study
1ccdbde2f3e30170996dbfe101f3908e	CAGCAGTGGGGGATATTGCACAATGGGGGAAACCCTGATGCAGCAACGCCGCGTGTGGGAAGAAGGTTTTCGGATTGTAAACCACTGTTCTCAGGGACGATAATGACGGTACCTGAGGAGAAAGCTCCGG	Shaufi	Ruminococcus	80% Study
58aaf99e9a9342ef9b4d82e2511cd667	CAGCAGTGAGGGATATTGGTCAATGGGGGAAACCCTGAACCAGCAACGCCGCGTGAGGGATGACGGTCTTCGGATTGTAAACCTCTGTCCTCTGTGAAGATAATGACGGTAGCAGAGGAGGAAGCTCCGG	Shaufi	Ruminococcus	80% Study
b4626bc2eb763574852a767810b58253	CAGCAGTGAGGGATATTCGGCAATGGGGGAAACCCTGACCGAGCAACGCCGCGTGAGGGAAGACGGTTTTCGGATTGTAAACCTCTGTCCTCTGTGAAGATAGTGACGGTAGCAGAGGAGGAAGCTCCGG	Shaufi	Ruminococcus	80% Study
79fa02c9e4738e08df7c240b3c7d5cce	CAGCAGTGGGGGATATTGCACAATGGGGGAAACCCTGATGCAGCAACGCCGCGTGAAGGATGAAGGTTTTCGGATTGTAAACTTCTGTTCTTAGTGACGATAATGACGGTAGCTAAGAAGAAAGCTCCGG	Shaufi	Ruminococcus	80% Study
a485af5a0ff19eb6eb36da0b736be987	CAGCAGTGGGGGATATTGCACAATGGGGGAAACCCTGATGCAGCAACGCCGCGTGAGGGAAGACGGTTTTCGGATTGTAAACCTCTGTCCTTGGTGACGATAATGACGGTAGCCAAGAAGGAAGCCACGG	Shaufi	Ruminococcus	80% Study
7f70dd02979f0d38769c582540c431db	CAGCAGTGGGGGATATTGCACAATGGGGGAAACCCTGATGCAGCAACGCCGCGTGAGGGAAGAAGGTTTTCGGATTGTAAACCTCTGTCCTTGGTGACGATAATGACGGTAGCCAAGGAGGAAGCTCCGG	Shaufi	Ruminococcus	80% Study
fd597b2f40ef5b166b7897eb1bd3f029	CAGCAGTGGGGGATATTGCGCAATGGGGGCAACCCTGACGCAGCAACGCCGCGTGAACGATGAAGGTCTTCGGATTGTAAAGTTCTTTTATTAAGGACGAAGAAGTGACGGTACTTAATGAATAAGCTCC	Shaufi	Ruminococcus	80% Study
a80b88dafa74d772f5433f9849a34be5	CAGCAGTGGGGGATATTGCACAATGGGGGAAACCCTGATGCAGCAACGCCGCGTGAGGGAAGAAGGTTTTCGGATTGTAAACCTCTGTCCTTAGTGAAGAAAGATGACGGTAGCTAAGGAGGAAGCTCCG	Shaufi	Ruminococcus	80% Study
b0285faf075aa89a1b20916baeb13c31	CAGCAGTGGGGGATATTGCACAATGGGGGGAACCCTGATGCAGCAACGCCGCGTGAGGGAAGAAGGTTTTCGGATTGTAAACCTCTGTCTTTGGTGACGATAATGACGGTAGCCAAGGAGGAAGCTCCGG	Shaufi	Ruminococcus	80% Study
23d2c0ad85b5de947259590cd76ffb8a	CAGCAGTGGGGGATATTGCACAATGGGGGAAACCCTGATGCAGCAACGCCGCGTGAGGGAAGACGGTTTTCGGATTGTAAACCTCTGTCCTTAGTGACGATAATGACGGTAGCTAAGGAGGAAGCCACGG	Shaufi	Ruminococcus	80% Study
b67dd425c211b1ce41795a351f1bc19d	CAGCAGTGGGGGATATTGCACAATGGGGGAAACCCTGATGCAGCAACGCCGCGTGAGGGAAGACGGTTTTCGGATTGTAAACCTCTGTCCTTGGTGACGATAATGACGGTAGCCAAGGAGGAAGCCACGG	Shaufi	Ruminococcus	80% Study
52af0965b8fbfedb171017a366a8fc6a	CAGCAGTGGGGGATATTGCACAATGGGGGAAACCCTGATGCAGCAACGCCGCGTGAGGGAAGACGGTTTTCGGATTGTAAACCTCTGTCATCGGTGACGATAATGACGGTAGCCGATGAGGAAGCTCCGG	Shaufi	Ruminococcus	80% Study
bb1294b1e05a9cf21d2404580d0e1233	CAGCAGTGGGGAATCTTCCGCAATGGACGAAAGTCTGACGGAGCAACGCCGCGTGAGTGATGAAGGATTTCGGTCTGTAAAGCTCTGTTGTTTATGACGAACGTGCAGTGTGTGAACAATGCATTGCAAT	Shaufi	Phascolarctobacterium	80% Study
a541d64ce6985ff18f70847e97564ed7	CAATGGAGGAAACTCTGATGCAGCGACGCCGCGTGAGGGAAGACGGTCTTCGGATTGTAAACCTCTGTCTTAGGGGAAGAAGATGACGGTACCCTAAGAGGAAGCTCCGGCTAACTACGTGCCAGCAGCC	Shaufi	Anaerotruncus	80% Study
3befa4700fcde867a64dd08567749275	CAGCAGTGGGGGATATTGCACAATGGGCGAAAGCCTGATGCAGCGACGCCGCGTGAGGGAAGACGGTCTTCGGATTGTAAACCTCTGTCTTTGGGGAAGAAAATGACGGTACCCAAAGAGGAAGCTCCGG	Shaufi	Anaerotruncus	80% Study
8a5543952964b0295164dff83a449988	CAGCAGTGGGGGATATTGCACAATGGAGGAAACTCTGATGCAGCGACGCCGCGTGAGGGAAGACGGTCTTCGGATTGTAAACCTCTGTCTTAGGGGAAGAAAGATGACGGTACCCTAAGAGGAAGCTCCG	Shaufi	Anaerotruncus	80% Study
aab812d1e0190e192c19d771c83fb24e	CAGCAGTGGGGGATATTGCACAATGGAGGGAACTCTGATGCAGCGACGCCGCGTGAGGGAAGACGGTCTTCGGATTGTAAACCTCTGTCTTAGGGGAAGAAAGATGACGGTACCCTAAGAGGAAGCTCCG	Shaufi	Anaerotruncus	80% Study
a1cdba0b8050a39da0836cc6af4d6967	CAGCAGTAGGGAATTTTCGGCAATGGGCGAAAGCCTGACCGAGCAACGCCGCGTGAAGGAAGAAGTCATTCGTGATGTAAACTTCTGTTATAAAGGAAGAACGGCGCCTGTAGGGAATGACAGGCGAGTG	Shaufi	Coprobacillus	80% Study
f5dbc27d2eefa6f8657361ddb7bbe048	CAGCAGTAGGGAATTTTCGGCAATGGGCGAAAGCCTGACCGAGCAACGCCGCGTGAAGGAAGAAGTCATTCGTGATGTAAACTTCTGTTATGAAGGAAGAACGGCAGATGGAGGGAATGCCATGTGCGTG	Shaufi	Coprobacillus	80% Study
b9a4aecee346ed13cce5896ec0831286	CAGCAGTAGGGAATTTTCGGCAATGGGGGAAACCCTGACCGAGCAACGCCGCGTGAGGGAAGAAGTATTTCGGTATGTAAACCTCTGTTATAAAGGAAGAACGGTATGAATAGGAAATGATTCATAAGTG	Shaufi	Coprobacillus	80% Study
dd31b643a75f017cade479dd6173253c	CAATGGGGGGAACCCTGACCGAGCAACGCCGCGTGAAGGAAGAAGGAATTCGTTCTGTAAACTTCTGTTATAAAGGAAGAACGGCACATATAGGGAATGATATGTGAGTGACGGTACTTTATGAGGAAGC	Shaufi	Clostridium	80% Study
99b342ba5fd81b2612f938186c3ee452	CAGCAGTGGGGAATATTGGACAATGGGGGAAACCCTGATCCAGCGACGCCGCGTGACTGAAGAAGTATTTCGGTATGTAAAGGTCTATCAGCAGGGAAGAAAATGACGGTACCTGACTAAGAAGCCCCGG	Shaufi	Clostridium	80% Study
afbacd5bded47c92f58321c454b99171	CAGCAGTAGGGAATTTTCGGCAATGGGGGGAACCCTGACCGAGCAACGCCGCGTGAAGGAAGAAGGAATTCGTTCTGTAAACTTCTGTTATAAAGGAAGAACGGCGGATATAGGGAATGATATCCGAGTG	Shaufi	Clostridium	80% Study
de8befcb28df8c2e4c465a8e3a593bea	CAGCAGTAGGGAATTTTCGGCAATGGGGGGAACCCTGACCGAGCAACGCCGCGTGAAGGAAGAAGGAATTCGTTCTGTAAACTTCTGTTATAAAGGAAGAACGGCACATATAGGGAATGATATGTGAGTG	Shaufi	Clostridium	80% Study
bcfe532c7306fa815717a1b7db409ba4	CAGCAGTGGGGAATATTGCACAATGGGGGGAACCCTGATGCAGCAACGCCGCGTGAAGGAAGAAGTATTTCGGTATGTAAACTTCTATCGACAGGGAAGAAAGAGATGACGGTACCTGAATAAGAAGCAC	Shaufi	Clostridium	80% Study
d4e67d7f8a3f8b474cec1768989ce5df	CAGCAGTAGGGAATTTTCGGCAATGGGGGGGAACCCTGACCGAGCAACGCCGCGTGAAGGAAGAAGGAATTCGTTCTGTAAACTTCTGTTATAAAGGAAGAACGGCGGATATAGGGAATGATATCCGAGT	Shaufi	Clostridium	80% Study
1a5762550d8ff235194287880b5684bd	CAGCAGTAGGGAATTTTCGGCAATGGGGGAAACCCTGACCGAGCAACGCCGCGTGAAGGAAGAAGGTTTTCGGATTGTAAACTTCTGTTATAAAGGAAGAACGGCGGCTACAGGAAATGGTAGCCGAGTG	Shaufi	Clostridium	80% Study
117f13b8716187d40583f110c0db4aa6	CAGCAGTGGGGAATATTGCACAATGGGGGAAACCCTGATGCAGCAACGCCGCGTGAGTGATGACGGCCTTCGGGTTGTAAAGCTCTGTCTTCAGGGACGATAATGACGGTACCTGAGGAGGAAGCCACGG	Shaufi	Clostridium	80% Study
e2c0a8d8abba350864b75e894d0b1c18	CAGCAGTGGGGAATATTGCACAATGGGGGAAACCCTGATGCAGCAACGCCGCGTGAGTGATGACGGCCTTCGGGTTGTAAAGCTCTGTCTTTGGGGACGATAATGACGGTACCCAAGGAGGAAGCCACGG	Shaufi	Clostridium	80% Study
f5ae62e8992c87b3dffd7be508049423	CAGCAGTGGGGAATATTGCACAATGGGGGAAACCCTGATGCAGCAACGCCGCGTGAGTGATGAAGGTTTTCGGATCGTAAAGCTCTGTCTTCAGGGACGATAATGACGGTACCTGAGGAGGAAGCCACGG	Shaufi	Clostridium	80% Study
e5bcb36e2dd17c82352ba58c02d812b5	CAGCAGTGGGGAATATTGCACAATGGGGGAAACCCTGATGCAGCAACGCCGCGTGAGTGAAGAAGGTTTTCGGATTGTAAAGCTCTGTTAGCAGGGAAGAGGAAGGACGGTACCTGCAGAGGAAGCCACG	Shaufi	Candidatus	80% Study
ad87d76e8b4c6786e80eb82e95b11485	CAGCAGTAGGGAATCTTCGGCAATGGACGAAAGTCTGACCGAGCAACGCCGCGTGAGTGAAGAAGGTTTTCGGATCGTAAAACTCTGTTGTTAGAGAAGAACAAGGATGAGAGTAACTGTTCATCCCTTG	Shaufi	Enterococcus	80% Study
6efb4da313881b249fe6894aac32fbee	CAGCAGTAGGGAATCTTCGGCAATGGACGCAAGTCTGACCGAGCAACGCCGCGTGAGTGAAGAAGGTTTTCGGATCGTAAAACTCTGTTGTTAGAGAAGAACAAGGATGAGAGTGGAAAGTTCATCCCTT	Shaufi	Enterococcus	80% Study
dd31b643a75f017cade479dd6173253c	CAATGGGGGGAACCCTGACCGAGCAACGCCGCGTGAAGGAAGAAGGAATTCGTTCTGTAAACTTCTGTTATAAAGGAAGAACGGCACATATAGGGAATGATATGTGAGTGACGGTACTTTATGAGGAAGC	Shaufi	Clostridium	80% Study
99b342ba5fd81b2612f938186c3ee452	CAGCAGTGGGGAATATTGGACAATGGGGGAAACCCTGATCCAGCGACGCCGCGTGACTGAAGAAGTATTTCGGTATGTAAAGGTCTATCAGCAGGGAAGAAAATGACGGTACCTGACTAAGAAGCCCCGG	Shaufi	Clostridium	80% Study
afbacd5bded47c92f58321c454b99171	CAGCAGTAGGGAATTTTCGGCAATGGGGGGAACCCTGACCGAGCAACGCCGCGTGAAGGAAGAAGGAATTCGTTCTGTAAACTTCTGTTATAAAGGAAGAACGGCGGATATAGGGAATGATATCCGAGTG	Shaufi	Clostridium	80% Study
de8befcb28df8c2e4c465a8e3a593bea	CAGCAGTAGGGAATTTTCGGCAATGGGGGGAACCCTGACCGAGCAACGCCGCGTGAAGGAAGAAGGAATTCGTTCTGTAAACTTCTGTTATAAAGGAAGAACGGCACATATAGGGAATGATATGTGAGTG	Shaufi	Clostridium	80% Study
bcfe532c7306fa815717a1b7db409ba4	CAGCAGTGGGGAATATTGCACAATGGGGGGAACCCTGATGCAGCAACGCCGCGTGAAGGAAGAAGTATTTCGGTATGTAAACTTCTATCGACAGGGAAGAAAGAGATGACGGTACCTGAATAAGAAGCAC	Shaufi	Clostridium	80% Study
d4e67d7f8a3f8b474cec1768989ce5df	CAGCAGTAGGGAATTTTCGGCAATGGGGGGGAACCCTGACCGAGCAACGCCGCGTGAAGGAAGAAGGAATTCGTTCTGTAAACTTCTGTTATAAAGGAAGAACGGCGGATATAGGGAATGATATCCGAGT	Shaufi	Clostridium	80% Study
1a5762550d8ff235194287880b5684bd	CAGCAGTAGGGAATTTTCGGCAATGGGGGAAACCCTGACCGAGCAACGCCGCGTGAAGGAAGAAGGTTTTCGGATTGTAAACTTCTGTTATAAAGGAAGAACGGCGGCTACAGGAAATGGTAGCCGAGTG	Shaufi	Clostridium	80% Study
117f13b8716187d40583f110c0db4aa6	CAGCAGTGGGGAATATTGCACAATGGGGGAAACCCTGATGCAGCAACGCCGCGTGAGTGATGACGGCCTTCGGGTTGTAAAGCTCTGTCTTCAGGGACGATAATGACGGTACCTGAGGAGGAAGCCACGG	Shaufi	Clostridium	80% Study
e2c0a8d8abba350864b75e894d0b1c18	CAGCAGTGGGGAATATTGCACAATGGGGGAAACCCTGATGCAGCAACGCCGCGTGAGTGATGACGGCCTTCGGGTTGTAAAGCTCTGTCTTTGGGGACGATAATGACGGTACCCAAGGAGGAAGCCACGG	Shaufi	Clostridium	80% Study
f5ae62e8992c87b3dffd7be508049423	CAGCAGTGGGGAATATTGCACAATGGGGGAAACCCTGATGCAGCAACGCCGCGTGAGTGATGAAGGTTTTCGGATCGTAAAGCTCTGTCTTCAGGGACGATAATGACGGTACCTGAGGAGGAAGCCACGG	Shaufi	Clostridium	80% Study
19c1d386bfb88b0c8deea85ce5444d38	CAGCAGTGGGGAATATTGCGCAATGGGGGCAACCCTGACGCAGCAATACCGCGTGAGTGAAGAAGGTTTTCGGATCGTAAAGCTCTGTTATTGGGGAAGAAAAAATGACGGTACCCAATGAGGAAGTCCC	Shaufi	Pseudoramibacter_Eubacterium	80% Study
fbab700dfc117906f43a829d3f6fcd9a	CAGCAGTAGGGAATTTTCGTCAATGGGGGGAACCCTGAACGAGCAATGCCGCGTGAGTGAAGAAGGTCTTCGGATCGTAAAGCTCTGTTGTAAGAGAAAAACGGACTCCATAGGGAATGATGGAGGAGTG	Shaufi	cc_115	80% Study
3ca2a9f2a912630c3a725dd50cb4434a	CAGCAGTAGGGAATTTTCGTCAATGGGGGGAACCCTGAACGAGCAATGCCGCGTGAGTGAAGAAGGTCTTCGGATCGTAAAGCTCTGTTGTAAGAGAAAAAGGGCGCATATAGGAAATGATATGCGATTG	Shaufi	cc_115	80% Study
f60db6adc26b11602367cce60f29c163	CAGCAGTAGGGAATTTTCGTCAATGGGGGGAACCCTGAACGAGCAATGCCGCGTGAGTGAAGAAGGTCTTCGGATCGTAAAGCTCTGTTGTAAGAGAAAAACGGGCTCCATAGGGAATGATGGAGGAGTG	Shaufi	cc_115	80% Study
dd31b643a75f017cade479dd6173253c	CAATGGGGGGAACCCTGACCGAGCAACGCCGCGTGAAGGAAGAAGGAATTCGTTCTGTAAACTTCTGTTATAAAGGAAGAACGGCACATATAGGGAATGATATGTGAGTGACGGTACTTTATGAGGAAGC	Shaufi	Clostridium	80% Study
99b342ba5fd81b2612f938186c3ee452	CAGCAGTGGGGAATATTGGACAATGGGGGAAACCCTGATCCAGCGACGCCGCGTGACTGAAGAAGTATTTCGGTATGTAAAGGTCTATCAGCAGGGAAGAAAATGACGGTACCTGACTAAGAAGCCCCGG	Shaufi	Clostridium	80% Study
afbacd5bded47c92f58321c454b99171	CAGCAGTAGGGAATTTTCGGCAATGGGGGGAACCCTGACCGAGCAACGCCGCGTGAAGGAAGAAGGAATTCGTTCTGTAAACTTCTGTTATAAAGGAAGAACGGCGGATATAGGGAATGATATCCGAGTG	Shaufi	Clostridium	80% Study
de8befcb28df8c2e4c465a8e3a593bea	CAGCAGTAGGGAATTTTCGGCAATGGGGGGAACCCTGACCGAGCAACGCCGCGTGAAGGAAGAAGGAATTCGTTCTGTAAACTTCTGTTATAAAGGAAGAACGGCACATATAGGGAATGATATGTGAGTG	Shaufi	Clostridium	80% Study
bcfe532c7306fa815717a1b7db409ba4	CAGCAGTGGGGAATATTGCACAATGGGGGGAACCCTGATGCAGCAACGCCGCGTGAAGGAAGAAGTATTTCGGTATGTAAACTTCTATCGACAGGGAAGAAAGAGATGACGGTACCTGAATAAGAAGCAC	Shaufi	Clostridium	80% Study
d4e67d7f8a3f8b474cec1768989ce5df	CAGCAGTAGGGAATTTTCGGCAATGGGGGGGAACCCTGACCGAGCAACGCCGCGTGAAGGAAGAAGGAATTCGTTCTGTAAACTTCTGTTATAAAGGAAGAACGGCGGATATAGGGAATGATATCCGAGT	Shaufi	Clostridium	80% Study
1a5762550d8ff235194287880b5684bd	CAGCAGTAGGGAATTTTCGGCAATGGGGGAAACCCTGACCGAGCAACGCCGCGTGAAGGAAGAAGGTTTTCGGATTGTAAACTTCTGTTATAAAGGAAGAACGGCGGCTACAGGAAATGGTAGCCGAGTG	Shaufi	Clostridium	80% Study
117f13b8716187d40583f110c0db4aa6	CAGCAGTGGGGAATATTGCACAATGGGGGAAACCCTGATGCAGCAACGCCGCGTGAGTGATGACGGCCTTCGGGTTGTAAAGCTCTGTCTTCAGGGACGATAATGACGGTACCTGAGGAGGAAGCCACGG	Shaufi	Clostridium	80% Study
e2c0a8d8abba350864b75e894d0b1c18	CAGCAGTGGGGAATATTGCACAATGGGGGAAACCCTGATGCAGCAACGCCGCGTGAGTGATGACGGCCTTCGGGTTGTAAAGCTCTGTCTTTGGGGACGATAATGACGGTACCCAAGGAGGAAGCCACGG	Shaufi	Clostridium	80% Study
f5ae62e8992c87b3dffd7be508049423	CAGCAGTGGGGAATATTGCACAATGGGGGAAACCCTGATGCAGCAACGCCGCGTGAGTGATGAAGGTTTTCGGATCGTAAAGCTCTGTCTTCAGGGACGATAATGACGGTACCTGAGGAGGAAGCCACGG	Shaufi	Clostridium	80% Study
8f77a244df7e677442cc265bee0c5077	CGGGAGGCAGCAGTGGGGAATATTGGGCAATGGGCGCAAGCCTGACCCAGCAACGCCGCGTGAAGGAAGAAGGCTTTCGGGTTGTAAACTTCTTTTGTCAGGGAACAGTAGAAGAGGGTACCTGACGAAT	Varmuzoba	Oscillospira	80% Study
dbca8a3f31f47b730d49c9b103a97080	CGGGAGGCTGCAGTGGGGAATATTGGGCAATGGGCGCAAGCCTGACCCAGCAACGCCGCGTGAAGGAAGAAGGCTTTCGGGTTGTAAACTTCTTTTGTCAGGGAACAGTAGAAGAGGGTACCTGACGAAT	Varmuzoba	Oscillospira	80% Study
b5d98b31be3b4646ae8db5c60b4191dd	CGGGTGGCAGCAGTGGGGAATATTGGGCAATGGGCGCAAGCCTGACCCAGCAACGCCGCGTGAAGGAAGAAGGCTTTCGGGTTGTAAACTTCTTTTGTCAGGGAACAGTAGAAGAGGGTACCTGACGAAT	Varmuzoba	Oscillospira	80% Study
b1dd815300f11940c3980bba5bcace4c	CGGGAGGCTGCAGTGGGGAATATTGGGCAATGGGCGCAAGCCTGACCCAGCAACGCCGCGTGAAGGAAGAAGGCCCTCGGGTTGTAAACTTCTTTTGTCAGGGACGAAGCAAGTGACGGTACCTGACGAA	Varmuzoba	Oscillospira	80% Study
20319da9d79410c72589c488db77ae82	CGGGCGGCAGCAGTGGGGAATATTGGGCAATGGGCGCAAGCCTGACCCAGCAACGCCGCGTGAAGGAAGAAGGCTTTCGGGTTGTAAACTTCTTTTGTCAGGGAACAGTAGAAGAGGGTACCTGACGAAT	Varmuzoba	Oscillospira	80% Study
72d6751ad22ab424c80ac732e0f84f1a	CGGGAGGCAGCAGTGGGGAATATTGGGCAATGGACGCAAGTCTGACCCAGCAACGCCGCGTGAAGGAAGAAGGCTTTCGGGTTGTAAACTTCTTTTGTCAGGGAACAGTAGAAGAGGGTACCTGACGAAT	Varmuzoba	Oscillospira	80% Study
8996f94f5bfdca57cdeacb5babd117c1	CGGGAGGCAGCAGTGGGGAATATTGGGCAATGGGCGCAAGCCTGACCCAGCAACGCCGCGTGAAGGAAGAAGGCCCTCGGGTTGTAAACTTCTTTTGTCAGGGACGAAGCAAGTGACGGTACCTGACGAA	Varmuzoba	Oscillospira	80% Study
7c35d18cb81999ff292c0c31bb5ebe68	CGGGAGGCTGCAGTGGGGAATATTGGGCAATGGACGCAAGTCTGACCCAGCAACGCCGCGTGAAGGAAGAAGGCTTTCGGGTTGTAAACTTCTTTTGTCAGGGAACAGTAGAAGAGGGTACCTGACGAAT	Varmuzoba	Oscillospira	80% Study
28e2319ffcfeab2c55dfb1b6621c2718	CGGGTGGCAGCAGTGGGGAATATTGGGCAATGGACGCAAGTCTGACCCAGCAACGCCGCGTGAAGGAAGAAGGCTTTCGGGTTGTAAACTTCTTTTGTCAGGGAACAGTAGAAGAGGGTACCTGACGAAT	Varmuzoba	Oscillospira	80% Study
967125f4acb2ae83ff64afe469f71b90	CGGGTGGCTGCAGTGGGGAATATTGGGCAATGGGCGCAAGCCTGACCCAGCAACGCCGCGTGAAGGAAGAAGGCTTTCGGGTTGTAAACTTCTTTTGTCAGGGAACAGTAGAAGAGGGTACCTGACGAAT	Varmuzoba	Oscillospira	80% Study
782592ff425a06b339dca5dfe1bd995a	CGGGTGGCAGCAGTGGGGAATATTGGGCAATGGGCGCAAGCCTGACCCAGCAACGCCGCGTGAAGGAAGAAGGCCCTCGGGTTGTAAACTTCTTTTGTCAGGGACGAAGCAAGTGACGGTACCTGACGAA	Varmuzoba	Oscillospira	80% Study
8209c333ed876fd8643ccb11c785a1f8	CGGGAGGCAGCAGTGGGGAATATTGGGCAATGGGCGCAAGCCTGACCCAGCAACGCCGCGTGAAGGAAGAAGGCCCTCGGGTTGTAAACTTCTTTTATCAGGGACGAAGCAAGTGACGGTACCTGATGAA	Varmuzoba	Oscillospira	80% Study
82d786dd505975d249efdf97ef5124ef	CGGGTGGCTGCAGTGGGGAATATTGGGCAATGGACGCAAGTCTGACCCAGCAACGCCGCGTGAAGGAAGAAGGCTTTCGGGTTGTAAACTTCTTTTGTCAGGGAACAGTAGAAGAGGGTACCTGACGAAT	Varmuzoba	Oscillospira	80% Study
38f7c081550902680b175d65a9b8ac78	CGGGGGGCAGCAGTGGGGAATATTGGGCAATGGGCGCAAGCCTGACCCAGCAACGCCGCGTGAAGGAAGAAGGCTTTCGGGTTGTAAACTTCTTTTGTCAGGGAACAGTAGAAGAGGGTACCTGACGAAT	Varmuzoba	Oscillospira	80% Study
6d0478af27ee2eb40ea09c387c9ee77c	CGGGGGGCAGCAGTGGGGAATATTGGGCAATGGGCGCAAGCCTGACCCAGCAACGCCGCGTGAAGGAAGAAGGCCCTCGGGTTGTAAACTTCTTTTGTCAGGGACGAAGCAAGTGACGGTACCTGACGAA	Varmuzoba	Oscillospira	80% Study
d3341be4397e733c8ade5a0504ceb647	CGGGAGGCTGCAGTGGGGAATATTGGGCAATGGGCGCAAGCCTGACCCAGCAACGCCGCGTGAAGGAAGAAGGCTTTCGGGTTGTAAACTTCTTTTGTCGGGGACGAAACAAATGACGGTACCCGACGAA	Varmuzoba	Oscillospira	80% Study
c52ac94a63e64590ba75b139fe502dfd	CGGGAGGCAGCAGTGGGGAATATTGGGCAATGGGCGCAAGCCTGACCCAGCAACGCCGCGTGAAGGAAGAAGGCTTTCGGGTTGTAAACTTCTTTTGTCGGGGACGAAACAAATGACGGTACCCGACGAA	Varmuzoba	Oscillospira	80% Study
150d9d951aba17ac20882ee504d9a446	CGGGGGGCAGCAGTGGGGAATATTGGGCAATGGGCGCAAGCCTGACCCAGCAACGCCGCGTGAAGGAAGAAGGCTTTCGGGTTGTAAACTTCTTTTGTCGGGGACGAAACAAATGACGGTACCCGACGAA	Varmuzoba	Oscillospira	80% Study
4832dded0aad26bcc44c25f50a2f812f	CGGGCGGCAGCAGTGGGGAATATTGGGCAATGGGCGCAAGCCTGACCCAGCAACGCCGCGTGAAGGAAGAAGGCCCTCGGGTTGTAAACTTCTTTTGTCAGGGACGAAGCAAGTGACGGTACCTGACGAA	Varmuzoba	Oscillospira	80% Study
9159cd8cc5372a6a4f7e97edb2950db6	CGGGGGGCTGCAGTGGGGAATATTGGGCAATGGGCGCAAGCCTGACCCAGCAACGCCGCGTGAAGGAAGAAGGCCCTCGGGTTGTAAACTTCTTTTGTCAGGGACGAAGCAAGTGACGGTACCTGACGAA	Varmuzoba	Oscillospira	80% Study
d1ed5979633e56d655fcf38a1bf4166f	CGGGCGGCTGCAGTGGGGAATATTGGGCAATGGGCGCAAGCCTGACCCAGCAACGCCGCGTGAAGGAAGAAGGCCCTCGGGTTGTAAACTTCTTTTGTCAGGGACGAAGCAAGTGACGGTACCTGACGAA	Varmuzoba	Oscillospira	80% Study
dc054f7637cad1b170858d357ce676db	CGGGTGGCTGCAGTGGGGAATATTGGGCAATGGGCGCAAGCCTGACCCAGCAACGCCGCGTGAAGGAAGAAGGCCCTCGGGTTGTAAACTTCTTTTGTCAGGGACGAAGCAAGTGACGGTACCTGACGAA	Varmuzoba	Oscillospira	80% Study
a7a6eb5c4db3c79c5cdfa2995cd741ce	CGGGGGGCTGCAGTGGGGAATATTGGGCAATGGGCGCAAGCCTGACCCAGCAACGCCGCGTGAAGGAAGAAGGCTTTCGGGTTGTAAACTTCTTTTGTCAGGGAACAGTAGAAGAGGGTACCTGACGAAT	Varmuzoba	Oscillospira	80% Study
256cb2a6735abf2778301741b57950a6	CGGGGGGCTGCAGTGGGGAATATTGGGCAATGGGCGCAAGCCTGACCCAGCAACGCCGCGTGAAGGAAGAAGGCTTTCGGGTTGTAAACTTCTTTTGTCGGGGACGAAACAAATGACGGTACCCGACGAA	Varmuzoba	Oscillospira	80% Study
dc2135e3eace23fbc096e3f82caf693a	AGGCAGCAGTGGGGAATATTGGGCAATGGGCGCAAGCCTGACCCAGCAACGCCGCGTGAAGGAAGAAGGCTTTCGGGTTGTAAACTTCTTTTGTCGGGGACGAAACAAATGACGGTACCTGACGAATAAG	Varmuzoba	Oscillospira	80% Study
35685dae391197908203d4584f88a920	GGGCAGCAGTGGGGAATATTGGGCAATGGGCGCAAGCCTGACCCAGCAACGCCGCGTGAAGGAAGAAGGCTTTCGGGTTGTAAACTTCTTTTGTCGGGGACGAAACAAATGACGGTACCTGACGAATAAG	Varmuzoba	Oscillospira	80% Study
d2731e4f056cd9b6a0d1a56f4a4d7d77	AGGCTGCAGTGGGGAATATTGGGCAATGGGCGCAAGCCTGACCCAGCAACGCCGCGTGAAGGAAGAAGGCTTTCGGGTTGTAAACTTCTTTTGTCGGGGACGAAACAAATGACGGTACCTGACGAATAAG	Varmuzoba	Oscillospira	80% Study
0446fc4a95ee67609389a18e88be29fa	TGGCAGCAGTGGGGAATATTGGGCAATGGGCGCAAGCCTGACCCAGCAACGCCGCGTGAAGGAAGAAGGCTTTCGGGTTGTAAACTTCTTTTGTCGGGGACGAAACAAATGACGGTACCTGACGAATAAG	Varmuzoba	Oscillospira	80% Study
6c4580448459ac1d19340e8418abd5bc	GGGCTGCAGTGGGGAATATTGGGCAATGGGCGCAAGCCTGACCCAGCAACGCCGCGTGAAGGAAGAAGGCTTTCGGGTTGTAAACTTCTTTTGTCGGGGACGAAACAAATGACGGTACCTGACGAATAAG	Varmuzoba	Oscillospira	80% Study
a10e6461a8ae9ca29a7a5e893b31e724	AGGCAGCAGTGGGGAATATTGGGCAATGGGCGCAAGCCTGACCCAGCAACGCCGCGTGAAGGAAGAAGGCCCTCGGGTTGTAAACTTCTTTTGTCAGGGACGAAGCAAGTGACGGTACCTGACGAATAAG	Varmuzoba	Oscillospira	80% Study
5d515243b842c56d21e8307c54674e6b	TGGCTGCAGTGGGGAATATTGGGCAATGGGCGCAAGCCTGACCCAGCAACGCCGCGTGAAGGAAGAAGGCTTTCGGGTTGTAAACTTCTTTTGTCGGGGACGAAACAAATGACGGTACCTGACGAATAAG	Varmuzoba	Oscillospira	80% Study
67cfef0d49177eded32cc4880e39e700	GGGCAGCAGTGGGGAATATTGGGCAATGGGCGCAAGCCTGACCCAGCAACGCCGCGTGAAGGAAGAAGGCTTTCGGGTTGTAAACTTCTTTTGTCAGGGAACAGTAGAAGAGGGTACCTGACGAATAAGC	Varmuzoba	Oscillospira	80% Study
10cda03cf8bec1ee84d0c5f9bf89fbd4	CGGCTGCAGTGGGGAATATTGGGCAATGGGCGCAAGCCTGACCCAGCAACGCCGCGTGAAGGAAGAAGGCTTTCGGGTTGTAAACTTCTTTTGTCGGGGACGAAACAAATGACGGTACCTGACGAATAAG	Varmuzoba	Oscillospira	80% Study
eb29dce9e6a05c25934120bfeff38039	AGGCAGCAGTGGGGAATATTGGGCAATGGGCGCAAGCCTGACCCAGCAACGCCGCGTGAAGGAAGAAGGCTTTCGGGTTGTAAACTTCTTTTGTCGGGGACGAAACAAATGACGGTACCCGACGAATAAG	Varmuzoba	Oscillospira	80% Study
1f53140b1727ccf476e294a71054e73a	TGGCAGCAGTGGGGAATATTGGGCAATGGGCGCAAGCCTGACCCAGCAACGCCGCGTGAAGGAAGAAGGCTTTCGGGTTGTAAACTTCTTTTGTCGGGGACGAAACAAATGACGGTACCCGACGAATAAG	Varmuzoba	Oscillospira	80% Study
01616331f47369b84c940fb6be59b37f	AGGCTGCAGTGGGGAATATTGGGCAATGGGCGCAAGCCTGACCCAGCAACGCCGCGTGAAGGAAGAAGGCTTTCGGGTTGTAAACTTCTTTTGTCGGGGACGAAACAAATGACGGTACCCGACGAATAAG	Varmuzoba	Oscillospira	80% Study
ea18d75c228b0d0238ce93415781a1e5	GGGCAGCAGTGGGGAATATTGGGCAATGGGCGCAAGCCTGACCCAGCAACGCCGCGTGAAGGAAGAAGGCTTTCGGGTTGTAAACTTCTTTTGTCGGGGACGAAACAAATGACGGTACCCGACGAATAAG	Varmuzoba	Oscillospira	80% Study
d74758f419ad64526a15f565670967a4	GGGCTGCAGTGGGGAATATTGGGCAATGGGCGCAAGCCTGACCCAGCAACGCCGCGTGAAGGAAGAAGGCTTTCGGGTTGTAAACTTCTTTTGTCGGGGACGAAACAAATGACGGTACCCGACGAATAAG	Varmuzoba	Oscillospira	80% Study
be1f30bdb7dc2708f67524496dfd5a50	CGGCTGCAGTGGGGAATATTGGGCAATGGGCGCAAGCCTGACCCAGCAACGCCGCGTGAAGGAAGAAGGCTTTCGGGTTGTAAACTTCTTTTGTCGGGGACGAAACAAATGACGGTACCCGACGAATAAG	Varmuzoba	Oscillospira	80% Study
c80a5a1ff84fb9ca22b25e4d96e049cf	TGGCAGCAGTGGGGAATATTGGGCAATGGGCGCAAGCCTGACCCAGCAACGCCGCGTGAAGGAAGAAGGCCCTCGGGTTGTAAACTTCTTTTGTCAGGGACGAAGCAAGTGACGGTACCTGACGAATAAG	Varmuzoba	Oscillospira	80% Study
e79f67ab49a64fee898be992ab34f35a	CGGGTGGCAGCAGTGGGGAATATTGGGCAATGGGCGCAAGCCTGACCCAGCAACGCCGCGTGAAGGAAGAAGGCTTTCGGGTTGTAAACTTCTTTTGTCGGGGACGAAACAAATGACGGTACCCGACGAA	Varmuzoba	Oscillospira	80% Study
e6b46c4993620eaf24a8447da5aed527	TGGCTGCAGTGGGGAATATTGGGCAATGGGCGCAAGCCTGACCCAGCAACGCCGCGTGAAGGAAGAAGGCTTTCGGGTTGTAAACTTCTTTTGTCGGGGACGAAACAAATGACGGTACCCGACGAATAAG	Varmuzoba	Oscillospira	80% Study
d7359145d95a8603df0d3b6322955a70	CGGCAGCAGTGGGGAATATTGGGCAATGGGCGCAAGCCTGACCCAGCAACGCCGCGTGAAGGAAGAAGGCTTTCGGGTTGTAAACTTCTTTTGTCGGGGACGAAACAAATGACGGTACCCGACGAATAAG	Varmuzoba	Oscillospira	80% Study
672c21c6e76564f3ccd8d66ea258f4fd	CGGCAGCAGTGGGGAATATTGGGCAATGGGCGCAAGCCTGACCCAGCAACGCCGCGTGAAGGAAGAAGGCTTTCGGGTTGTAAACTTCTTTTGTCGGGGACGAAACAAATGACGGTACCTGACGAATAAG	Varmuzoba	Oscillospira	80% Study
614834831ec0f74c5ef6f2cbe5221529	CGGCTGCAGTGGGGAATATTGGGCAATGGGCGCAAGCCTGACCCAGCAACGCCGCGTGAAGGAAGAAGGCCCTCGGGTTGTAAACTTCTTTTGTCAGGGACGAAGCAAGTGACGGTACCTGACGAATAAG	Varmuzoba	Oscillospira	80% Study
bb82a069d8e7026b8183fd6c98e06736	GGGCAGCAGTGGGGAATATTGGGCAATGGGCGCAAGCCTGACCCAGCAACGCCGCGTGAAGGAAGAAGGCCCTCGGGTTGTAAACTTCTTTTGTCAGGGACGAAGCAAGTGACGGTACCTGACGAATAAG	Varmuzoba	Oscillospira	80% Study
23ac1e8a283c6922bfb2c6d1e70da6dc	AGGCAGCAGTGGGGAATATTGGGCAATGGGCGCAAGCCTGACCCAGCAACGCCGCGTGAAGGATGAAGGCTTTCGGGTTGTAAACTTCTTTTATCAGGGACGAATTCTGACGGTACCTGATGAATAAGCC	Varmuzoba	Oscillospira	80% Study
6088293dda56eab71d584e8b90aaa587	TGGCTGCAGTGGGGAATATTGGGCAATGGGCGCAAGCCTGACCCAGCAACGCCGCGTGAAGGAAGAAGGCCCTCGGGTTGTAAACTTCTTTTGTCAGGGACGAAGCAAGTGACGGTACCTGACGAATAAG	Varmuzoba	Oscillospira	80% Study
a652287343be34874c87edaee170aa29	TGGCAGCAGTGGGGAATATTGGGCAATGGGCGCAAGCCTGACCCAGCAACGCCGCGTGAAGGATGAAGGCTTTCGGGTTGTAAACTTCTTTTATCAGGGACGAATTCTGACGGTACCTGATGAATAAGCC	Varmuzoba	Oscillospira	80% Study
f898745cc44b5f2c159f98fcde8499a7	GGGCTGCAGTGGGGAATATTGGGCAATGGGCGCAAGCCTGACCCAGCAACGCCGCGTGAAGGAAGAAGGCCCTCGGGTTGTAAACTTCTTTTGTCAGGGACGAAGCAAGTGACGGTACCTGACGAATAAG	Varmuzoba	Oscillospira	80% Study
3b6b2dd514d1f682558923b8cdf3d9e2	CTACGGGAGGCAGCAGTGGGGAATATTGGGCAATGGGCGCAAGCCTGACCCAGCAACGCCGCGTGAAGGAAGAAGGCCCTCGGGTTGTAAACTTCTTTTGTCAGGGACGAAGCAAGTGACGGTACCTGAC	Varmuzoba	Oscillospira	80% Study
e5d7aa1cb117bc796d6f8bdf70d34eef	CTACGGGTGGCAGCAGTGGGGAATATTGGGCAATGGGCGCAAGCCTGACCCAGCAACGCCGCGTGAAGGAAGAAGGCCCTCGGGTTGTAAACTTCTTTTGTCAGGGACGAAGCAAGTGACGGTACCTGAC	Varmuzoba	Oscillospira	80% Study
d4d24534ec0130b58d2df3f40d4535f5	CTACGGGAGGCAGCAGTGGGGAATATTGGGCAATGGGCGCAAGCCTGACCCAGCAACGCCGCGTGAAGGAAGAAGGCTTTCGGGTTGTAAACTTCTTTTGTCGGGGACGAAACAAATGACGGTACCCGAC	Varmuzoba	Oscillospira	80% Study
bac14332f3cdd5780236b04ceec0af2f	CTACGGGCGGCAGCAGTGGGGAATATTGGGCAATGGGCGCAAGCCTGACCCAGCAACGCCGCGTGAAGGAAGAAGGCCCTCGGGTTGTAAACTTCTTTTGTCAGGGACGAAGCAAGTGACGGTACCTGAC	Varmuzoba	Oscillospira	80% Study
a444ae498ff0bd51862c7f12bdf2b762	CTACGGGAGGCTGCAGTGGGGAATATTGGGCAATGGGCGCAAGCCTGACCCAGCAACGCCGCGTGAAGGAAGAAGGCCCTCGGGTTGTAAACTTCTTTTGTCAGGGACGAAGCAAGTGACGGTACCTGAC	Varmuzoba	Oscillospira	80% Study
b0a20debcdcc0b4062c97e019121f478	GAGGCAGCAGTGGGGAATATTGGGCAATGGGCGCAAGCCTGACCCAGCAACGCCGCGTGAAGGAAGAAGGCTTTCGGGTTGTAAACTTCTTTTGTCGGGGACGAAACAAATGACGGTACCCGACGAATAA	Varmuzoba	Oscillospira	80% Study
bf6ce56e4d2b66a233ca9ec18accbb97	GGGGCAGCAGTGGGGAATATTGGGCAATGGGCGCAAGCCTGACCCAGCAACGCCGCGTGAAGGAAGAAGGCTTTCGGGTTGTAAACTTCTTTTGTCGGGGACGAAACAAATGACGGTACCCGACGAATAA	Varmuzoba	Oscillospira	80% Study
698daadd8aced5d5afe32b1c7236aeb1	GAGGCTGCAGTGGGGAATATTGGGCAATGGGCGCAAGCCTGACCCAGCAACGCCGCGTGAAGGAAGAAGGCTTTCGGGTTGTAAACTTCTTTTGTCGGGGACGAAACAAATGACGGTACCCGACGAATAA	Varmuzoba	Oscillospira	80% Study
4a9ded2aafe6da22d89859a95829544a	GAGGCAGCAGTGGGGAATATTGGGCAATGGACGCAAGTCTGACCCAGCAACGCCGCGTGAAGGAAGAAGGCTTTCGGGTTGTAAACTTCTTTTGTCAGGGAAGAGCAGAAGACGGTACCTGACGAATAAG	Varmuzoba	Oscillospira	80% Study
9f95ee78070c76c1d35e923f09a71784	GAGGCAGCAGTGGGGAATATTGGGCAATGGGCGCAAGCCTGACCCAGCAACGCCGCGTGAAGGAAGAAGGCCCTCGGGTTGTAAACTTCTTTTGTCAGGGACGAAGCAAGTGACGGTACCTGACGAATAA	Varmuzoba	Oscillospira	80% Study
6464669d9b17a52f48c2255adeb9136a	GTGGCAGCAGTGGGGAATATTGGGCAATGGACGCAAGTCTGACCCAGCAACGCCGCGTGAAGGAAGAAGGCTTTCGGGTTGTAAACTTCTTTTGTCAGGGAAGAGCAGAAGACGGTACCTGACGAATAAG	Varmuzoba	Oscillospira	80% Study
3dbdcf0db62efefa0ae50cba32c6b700	GGGGCAGCAGTGGGGAATATTGGGCAATGGGCGCAAGCCTGACCCAGCAACGCCGCGTGAAGGAAGAAGGCCCTCGGGTTGTAAACTTCTTTTGTCAGGGACGAAGCAAGTGACGGTACCTGACGAATAA	Varmuzoba	Oscillospira	80% Study
c2c8f58a02dd546f95b6047829ac5dcb	GTGGCAGCAGTGGGGAATATTGGGCAATGGGCGCAAGCCTGACCCAGCAACGCCGCGTGAAGGAAGAAGGCTTTCGGGTTGTAAACTTCTTTTGTCGGGGACGAAACAAATGACGGTACCCGACGAATAA	Varmuzoba	Oscillospira	80% Study
af1c72cbfe4c842c3a5b5ba8f86a7664	GAGGCTGCAGTGGGGAATATTGGGCAATGGGCGCAAGCCTGACCCAGCAACGCCGCGTGAAGGAAGAAGGCCCTCGGGTTGTAAACTTCTTTTGTCAGGGACGAAGCAAGTGACGGTACCTGACGAATAA	Varmuzoba	Oscillospira	80% Study
182b32fc535540367299ff6aff39c7bf	CTACGGGGGGCTGCAGTGGGGAATATTGGGCAATGGGCGCAAGCCTGACCCAGCAACGCCGCGTGAAGGAAGAAGGCCCTCGGGTTGTAAACTTCTTTTGTCAGGGACGAAGCAAGTGACGGTACCTGAC	Varmuzoba	Oscillospira	80% Study
85cdd0aeac88b55011dfb9e30eb527e8	GTGGCAGCAGTGGGGAATATTGGGCAATGGGCGCAAGCCTGACCCAGCAACGCCGCGTGAAGGAAGAAGGCCCTCGGGTTGTAAACTTCTTTTGTCAGGGACGAAGCAAGTGACGGTACCTGACGAATAA	Varmuzoba	Oscillospira	80% Study
8189ef549da5286b927a4542ea683c3c	CTACGGGTGGCTGCAGTGGGGAATATTGGGCAATGGGCGCAAGCCTGACCCAGCAACGCCGCGTGAAGGAAGAAGGCCCTCGGGTTGTAAACTTCTTTTGTCAGGGACGAAGCAAGTGACGGTACCTGAC	Varmuzoba	Oscillospira	80% Study
51123391d0f7808eaf6582194dfb8117	CTACGGGGGGCTGCAGTGGGGAATATTGGGCAATGGGCGCAAGCCTGACCCAGCAACGCCGCGTGAAGGAAGAAGGCTTTCGGGTTGTAAACTTCTTTTGTCGGGGACGAAACAAATGACGGTACCCGAC	Varmuzoba	Oscillospira	80% Study
ad7199c71f09e7251f53418b5442ef22	CTACGGGCGGCAGCAGTGGGGAATATTGGGCAATGGGCGCAAGCCTGACCCAGCAACGCCGCGTGAAGGAAGAAGGCTTTCGGGTTGTAAACTTCTTTTGTCGGGGACGAAACAAATGACGGTACCCGAC	Varmuzoba	Oscillospira	80% Study
fe9bf73f54bc66cda8f43b54b61a39a2	CTACGGGTGGCTGCAGTGGGGAATATTGGGCAATGGGCGCAAGCCTGACCCAGCAACGCCGCGTGAAGGAAGAAGGCTTTCGGGTTGTAAACTTCTTTTGTCGGGGACGAAACAAATGACGGTACCCGAC	Varmuzoba	Oscillospira	80% Study
9871a95bdf0cbb954f6673f36c682ce8	CTACGGGAGGCTGCAGTGGGGAATATTGGGCAATGGGCGCAAGCCTGACCCAGCAACGCCGCGTGAAGGAAGAAGGCTTTCGGGTTGTAAACTTCTTTTGTCGGGGACGAAACAAATGACGGTACCCGAC	Varmuzoba	Oscillospira	80% Study
fb5e1b4d1c0f6165dbaef655a5dff1a0	CTACGGGGGGCAGCAGTGGGGAATATTGGGCAATGGGCGCAAGCCTGACCCAGCAACGCCGCGTGAAGGAAGAAGGCTTTCGGGTTGTAAACTTCTTTTGTCGGGGACGAAACAAATGACGGTACCCGAC	Varmuzoba	Oscillospira	80% Study
bbdb5b90de6427152db60ec5622d1e72	CTACGGGAGGCAGCAGTGGGGAATATTGGGCAATGGGCGCAAGCCTGACCCAGCAACGCCGCGTGAAGGAAGAAGGCTTTCGGGTTGTAAACTTCTTTTGTCAGGGAACAGTAGAAGAGGGTACCTGACG	Varmuzoba	Oscillospira	80% Study
2502515e714edc3e4b7b6f238f2a1047	CTACGGGAGGCTGCAGTGGGGAATATTGGGCAATGGGCGCAAGCCTGACCCAGCAACGCCGCGTGAAGGAAGAAGGCTTTCGGGTTGTAAACTTCTTTTGTCAGGGAACAGTAGAAGAGGGTACCTGACG	Varmuzoba	Oscillospira	80% Study
a7c5af33b67431ac96d1c478fb9829cd	CTACGGGGGGCAGCAGTGGGGAATATTGGGCAATGGGCGCAAGCCTGACCCAGCAACGCCGCGTGAAGGAAGAAGGCTTTCGGGTTGTAAACTTCTTTTGTCAGGGAACAGTAGAAGAGGGTACCTGACG	Varmuzoba	Oscillospira	80% Study
e23f5e58f00ccd0ad27b5d5346a76761	CTACGGGAGGCAGCAGTGGGGAATATTGGGCAATGGGCGCAAGCCTGACCCAGCAACGCCGCGTGAAGGAAGAAGGCCCTCGGGTTGTAAACTTCTTTTATCAGGGACGAAGCAAGTGACGGTACCTGAT	Varmuzoba	Oscillospira	80% Study
b5ae723fca7558a06e92132a981c8313	CTACGGGAGGCAGCAGTGGGGAATATTGGGCAATGGGCGCAAGCCTGACCCAGCAACGCCGCGTGAAGGAAGAAGGCCCTCGGGTTGTAAACTTCTTTTAACAGGGACGAAGTAAGTGACGGTACCTGTT	Varmuzoba	Oscillospira	80% Study
88a3af9d2df6a543832b3790be1c08cc	CTACGGGAGGCAGCAGTGGGGAATATTGGGCAATGGGCGCAAGCCTGACCCAGCAACGCCGCGTGAAGGAAGAAGGCCCTCGGGTTGTAAACTTCTTTTAACAGGGACGAAGCAAGTGACGGTACCTGTT	Varmuzoba	Oscillospira	80% Study
0bdd6eded53d93e815ed4af84d666f50	CTACGGGGGGCAGCAGTGGGGAATATTGGGCAATGGGCGCAAGCCTGACCCAGCAACGCCGCGTGAAGGAAGAAGGCCCTCGGGTTGTAAACTTCTTTTGTCAGGGACGAAGCAAGTGACGGTACCTGAC	Varmuzoba	Oscillospira	80% Study
85f0dfd3f04cd21b5fe51dbbcc06aba5	CTACGGGAGGCAGCAGTGGGGAATATTGGGCAATGGACGCAAGTCTGACCCAGCAACGCCGCGTGAAGGAAGAAGGCTTTCGGGTTGTAAACTTCTTTTGTCAGGGAACAGTAGAAGAGGGTACCTGACG	Varmuzoba	Oscillospira	80% Study
665bcf8c7f9fa484b82c687c2d5b418e	CTACGGGTGGCAGCAGTGGGGAATATTGGGCAATGGGCGCAAGCCTGACCCAGCAACGCCGCGTGAAGGAAGAAGGCTTTCGGGTTGTAAACTTCTTTTGTCAGGGAACAGTAGAAGAGGGTACCTGACG	Varmuzoba	Oscillospira	80% Study
c4be5745d55de44eed21ae97c6ed501b	CTACGGGAGGCAGCAGTGGGGAATATTGGGCAATGGGCGCAAGCCTGACCCAGCAACGCCGCGTGAAGGATGAAGGCTTTCGGGTTGTAAACTTCTTTTATCAGGGACGAATTCTGACGGTACCTGATGA	Varmuzoba	Oscillospira	80% Study
91cb431cd66cff018e677c7ad971d41a	CTACGGGAGGCTGCAGTGGGGAATATTGGGCAATGGGCGCAAGCCTGACCCAGCAACGCCGCGTGAAGGAAGAAGGCCCTCGGGTTGTAAACTTCTTTTAACAGGGACGAAGTAAGTGACGGTACCTGTT	Varmuzoba	Oscillospira	80% Study
8751e24a26fc354457fb161ad6a444aa	CTACGGGAGGCTGCAGTGGGGAATATTGGGCAATGGGCGCAAGCCTGACCCAGCAACGCCGCGTGAAGGATGAAGGCTTTCGGGTTGTAAACTTCTTTTATCAGGGACGAATTCTGACGGTACCTGATGA	Varmuzoba	Oscillospira	80% Study
e94b269da06a12022db2668b05427648	CTACGGGGGGCAGCAGTGGGGAATATTGGGCAATGGGCGCAAGCCTGACCCAGCAACGCCGCGTGAAGGAAGAAGGCCCTCGGGTTGTAAACTTCTTTTATCAGGGACGAAGCAAGTGACGGTACCTGAT	Varmuzoba	Oscillospira	80% Study
63d6df5214fc71aa1902347fef5aac04	CTACGGGAGGCTGCAGTGGGGAATATTGGGCAATGGGCGCAAGCCTGACCCAGCAACGCCGCGTGAAGGAAGAAGGCCCTCGGGTTGTAAACTTCTTTTATCAGGGACGAAGCAAGTGACGGTACCTGAT	Varmuzoba	Oscillospira	80% Study
9ad416ffa1fd05c2279cb7dc0ccafd35	CTACGGGTGGCAGCAGTGGGGAATATTGGGCAATGGGCGCAAGCCTGACCCAGCAACGCCGCGTGAAGGATGAAGGCTTTCGGGTTGTAAACTTCTTTTATCAGGGACGAATTCTGACGGTACCTGATGA	Varmuzoba	Oscillospira	80% Study
74e969bae536bcc7aafd1477c85c5941	CTACGGGGGGCAGCAGTGGGGAATATTGGGCAATGGGCGCAAGCCTGACCCAGCAACGCCGCGTGAAGGATGAAGGCTTTCGGGTTGTAAACTTCTTTTATCAGGGACGAATTCTGACGGTACCTGATGA	Varmuzoba	Oscillospira	80% Study
d5289ae00718384f866a5708f01eac2f	AGGCTGCAGTGGGGAATATTGGGCAATGGGCGCAAGCCTGACCCAGCAACGCCGCGTGAAGGAAGAAGGCCCTCGGGTTGTAAACTTCTTTTGTCAGGGACGAAGCAAGTGACGGTACCTGACGAATAAG	Varmuzoba	Oscillospira	80% Study
779f6a63a79591d81e18a117078dca75	CGGCAGCAGTGGGGAATATTGGGCAATGGGCGCAAGCCTGACCCAGCAACGCCGCGTGAAGGAAGAAGGCCCTCGGGTTGTAAACTTCTTTTGTCAGGGACGAAGCAAGTGACGGTACCTGACGAATAAG	Varmuzoba	Oscillospira	80% Study
0d72b9b901140136c703ed0655d7a40c	CGGGGGGCAGCAGTGGGGAATATTGGGCAATGGGCGCAAGCCTGACCCAGCAACGCCGCGTGAAGGAAGAAGGCTTTCGGGTTGTAAACTTCTTTTGTCGGGGACGAAACAAATGACGGTACCTGACGAA	Varmuzoba	Oscillospira	80% Study
b2d20d6fa22fc79f792ebd71803de532	CTACGGGTGGCTGCAGTGGGGAATATTGGGCAATGGGCGCAAGCCTGACCCAGCAACGCCGCGTGAAGGAAGAAGGCTTTCGGGTTGTAAACTTCTTTTGTCAGGGAACAGTAGAAGAGGGTACCTGACG	Varmuzoba	Oscillospira	80% Study
3bcba175e7014ee7f28d0bc0d42909a0	CTACGGGGGGCTGCAGTGGGGAATATTGGGCAATGGGCGCAAGCCTGACCCAGCAACGCCGCGTGAAGGAAGAAGGCTTTCGGGTTGTAAACTTCTTTTGTCAGGGAACAGTAGAAGAGGGTACCTGACG	Varmuzoba	Oscillospira	80% Study
07c3f5c20f1491f5cc965ec6b5da695c	CTACGGGTGGCAGCAGTGGGGAATATTGGGCAATGGGCGCAAGCCTGACCCAGCAACGCCGCGTGAAGGAAGAAGGCCCTCGGGTTGTAAACTTCTTTTATCAGGGACGAAGCAAGTGACGGTACCTGAT	Varmuzoba	Oscillospira	80% Study
6e766dfbf3d88bb276d24dc19bdd0479	CTACGGGAGGCTGCAGTGGGGAATATTGGGCAATGGGCGCAAGCCTGACCCAGCAACGCCGCGTGAAGGAAGAAGGCCCTCGGGTTGTAAACTTCTTTTAACAGGGACGAAGCAAGTGACGGTACCTGTT	Varmuzoba	Oscillospira	80% Study
a1a1f636b5688042213b9440a18bf955	CTACGGGTGGCAGCAGTGGGGAATATTGGGCAATGGGCGCAAGCCTGACCCAGCAACGCCGCGTGAAGGAAGAAGGCTTTCGGGTTGTAAACTTCTTTTGTCGGGGACGAAACAAATGACGGTACCCGAC	Varmuzoba	Oscillospira	80% Study
4b7e274c8f7d04d2c68af0121bd7c49b	CTACGGGCGGCTGCAGTGGGGAATATTGGGCAATGGGCGCAAGCCTGACCCAGCAACGCCGCGTGAAGGAAGAAGGCTTTCGGGTTGTAAACTTCTTTTGTCGGGGACGAAACAAATGACGGTACCCGAC	Varmuzoba	Oscillospira	80% Study
a43e960c2f0359ddfc80473d503e6541	CTACGGGAGGCTGCAGTGGGGAATATTGGGCAATGGGCGCAAGCCTGACCCAGCAATGCCGCGTGAAGGAAGAAGGCTTTCGGGTTGTAAACTTCTTTTGTCAGGGAAGAGAAGAAGACGGTACCTGACG	Varmuzoba	Oscillospira	80% Study
7342f43f74078bec35fdc1830c218225	CGGGGGGCAGCAGTGGGGAATATTGGGCAATGGGCGCAAGCCTGACCCAGCAACGCCGCGTGAAGGAAGAAGGCCCTCGGGTTGTAAACTTCTTTTATCAGGGACGAAGCAAGTGACGGTACCTGATGAA	Varmuzoba	Oscillospira	80% Study
fdb879447526d3cbcbc19735ee78a7b5	CAATGGGCGCAAGCCTGACCCAGCAACGCCGCGTGAAGGAAGAAGGCCCTCGGGTTGTAAACTTCTTTTGTCAGGGACGAAGCAAGTGACGGTACCTGACGAATAAGCCACGGCTAACTACGTGCCAGCA	Varmuzoba	Oscillospira	80% Study
82da4148485d6eb448efa10e42ec1d47	CAATGGGCGCAAGCCTGACCCAGCAACGCCGCGTGAAGGAAGAAGGCTTTCGGGTTGTAAACTTCTTTTGTCAGGGAACAGTAGAAGAGGGTACCTGACGAATAAGCCACGGCTAACTACGTGCCAGCAG	Varmuzoba	Oscillospira	80% Study
d7ff55a70157b9e88fa3cb92636e1cf6	CAATGGGCGAAAGCCTGACCCAGCAACGCCGCGTGAAGGAAGAAGGCTTTCGGGTTGTAAACTTCTTTTATCAGGGACGAAGGATGTGACGGTACCTGATGAATAAGCCACGGCTAACTACGTGCCAGCA	Varmuzoba	Oscillospira	80% Study
e8848b3dc781ce19d2bd7bce9c4fdd7a	CAATGGGCGCAAGCCTGACCCAGCAACGCCGCGTGAAGGAAGAAGGCTTTCGGGTTGTAAACTTCTTTTGTCAGGGACGAACAAATGACGGTACCTGACGAATAAGCCACGGCTAACTACGTGCCAGCAG	Varmuzoba	Oscillospira	80% Study
968dfccd3413010d45f277037c37f70f	CAATGGGCGCAAGCCTGACCCAGCAACGCCGCGTGAAGGAAGAAGGCTTTCGGGTTGTAAACTTCTTTTGTCAGGGAACAGTAGAAGAGGGTACCTGACGAATAAGCTCCGGCTAACTACGTGCCAGCAG	Varmuzoba	Oscillospira	80% Study
f1dc1342e68dbf404ee037deacbe7b93	CAATGGGCGCAAGCCTGACCCAGCAACGCCGCGTGAAGGAAGAAGGCTTTCGGGTTGTAAACTTCTTTTGTCAGGGAAGAGGAGAAGACTGTACCTGACGAATAAGCTCCGGCTAACTACGTGCCAGCAG	Varmuzoba	Oscillospira	80% Study
fa1815ef7d6a72eb8e6a6060b3960f31	CAATGGGCGCAAGCCTGACCCAGCAACGCCGCGTGAAGGAAGAAGGCTTTCGGGTTGTAAACTTCTTTTATTCGGGACGATAGTGACGGTACCGAATGAATAAGCCACGGCTAACTACGTGCCAGCAGCC	Varmuzoba	Oscillospira	80% Study
078e7befe5ed38e1d46644bb93805858	CAATGGGCGAAAGCCTGACCCAGCAACGCCGCGTGAAGGAAGAAGGCTTTCGGGTTGTAAACTTCTTTTATCAGGGACGAAGTAGTGACGGTACCTGATGAATAAGCTCCGGCTAACTACGTGCCAGCAG	Varmuzoba	Oscillospira	80% Study
50c6ad36b44679ed3432f29cae3aeaf9	CAATGGGCGCAAGCCTGACCCAGCAACGCCGCGTGAAGGAAGAAGGCTTTCGGGTTGTAAACTTCTTTTCTTAGGGACGAAGGAAGTGACGGTACCTAAGGAATAAGCTCCGGCTAACTACGTGCCAGCA	Varmuzoba	Oscillospira	80% Study
883c45fb8e42f84d665cbfe49b27972c	CAATGGGCGCAAGCCTGACCCAGCAACGCCGCGTGAAGGAAGAAGGCTTTCGGGTTGTAAACTTCTTTTCTTGGGGACGAAACAAATGACGGTACCTAAGGAATAAGCTCCGGCTAACTACGTGCCAGCA	Varmuzoba	Oscillospira	80% Study
833c369f9867ad1ae128212a3f5d3439	CAATGGGCGCAAGCCTGACCCAGCAACGCCGCGTGAAGGAAGAAGGCTTTCGGGTTGTAAACTTCTTTTGTCAGGGAAGATGAAAGAGACTGTACCTGACGAATAAGCCACGGCTAACTACGTGCCAGCA	Varmuzoba	Oscillospira	80% Study
a2de5a82fbe20bd5a562892b3260b387	CAATGGACGCAAGTCTGACCCAGCAACGCCGCGTGAAGGAAGAAGGCTTTCGGGTTGTAAACTTCTTTTGTCAGGGAACAGTAGAAGAGGGTACCTGACGAATAAGCCACGGCTAACTACGTGCCAGCAG	Varmuzoba	Oscillospira	80% Study
1039e01fbbd09d024e085c66093311ef	CAATGGGCGCAAGCCTGACCCAGCAACGCCGCGTGAAGGAAGAAGGCTTTCGGGTTGTAAACTTCTTTTATTCGGGACGAAGCAAGTGACGGTACCGAATGAATAAGCCACGGCTAACTACGTGCCAGCA	Varmuzoba	Oscillospira	80% Study
6013f2d680276a29488635d7857b5d11	CAATGGGCGCAAGCCTGACCCAGCAACGCCGCGTGAAGGAAGAAGGCTTTCGGGTTGTAAACTTCTTTTGTCAGGGAAGATGAACGAGACTGTACCTGACGAATAAGCCACGGCTAACTACGTGCCAGCA	Varmuzoba	Oscillospira	80% Study
b4a25d71b1b950be57351fbf9e519191	CTACGGGCGGCAGCAGTGGGGAATATTGGGCAATGGGCGCAAGCCTGACCCAGCAACGCCGCGTGAAGGAAGAAGGCTTTCGGGTTGTAAACTTCTTTTGTCAGGGAACAGTAGAAGAGGGTACCTGACG	Varmuzoba	Oscillospira	80% Study
82d7517db5276c77af1e791f93c9a0b3	AGGCAGCAGTGGGGAATATTGGGCAATGGGCGCAAGCCTGACCCAGCAACGCCGCGTGAAGGAAGAAGGCTTTCGGGTTGTAAACTTCTTTTGTCAGGGAACAGTAGAAGAGGGTACCTGACGAATAAGC	Varmuzoba	Oscillospira	80% Study
686c952dff993617891577a6513820ca	AGGCTGCAGTGGGGAATATTGGGCAATGGGCGCAAGCCTGACCCAGCAACGCCGCGTGAAGGAAGAAGGCTTTCGGGTTGTAAACTTCTTTTGTCAGGGAACAGTAGAAGAGGGTACCTGACGAATAAGC	Varmuzoba	Oscillospira	80% Study
42eac759efb464fd5706af1503356a0e	CGGCAGCAGTGGGGAATATTGGGCAATGGGCGCAAGCCTGACCCAGCAACGCCGCGTGAAGGAAGAAGGCTTTCGGGTTGTAAACTTCTTTTGTCAGGGAACAGTAGAAGAGGGTACCTGACGAATAAGC	Varmuzoba	Oscillospira	80% Study
a926d89f4001e3151ad8b244527b121b	AGGCAGCAGTGGGGAATATTGGGCAATGGGCGCAAGCCTGACCCAGCAACGCCGCGTGAAGGAAGAAGGCCCTCGGGTTGTAAACTTCTTTTATCAGGGACGAAGCAAGTGACGGTACCTGATGAATAAG	Varmuzoba	Oscillospira	80% Study
5ce754e246661e18f5307bc93d4f699d	TGGCAGCAGTGGGGAATATTGGGCAATGGGCGCAAGCCTGACCCAGCAACGCCGCGTGAAGGAAGAAGGCTTTCGGGTTGTAAACTTCTTTTGTCAGGGAACAGTAGAAGAGGGTACCTGACGAATAAGC	Varmuzoba	Oscillospira	80% Study
5ba2117c9ec1f74aac3f3ce1dfc5f340	AGGCTGCAGTGGGGAATATTGGGCAATGGGCGCAAGCCTGACCCAGCAACGCCGCGTGAAGGATGAAGGCTTTCGGGTTGTAAACTTCTTTTATCAGGGACGAATTCTGACGGTACCTGATGAATAAGCC	Varmuzoba	Oscillospira	80% Study
9d7bbb163d8fe92bdb3e3b42c6161f51	GGGCAGCAGTGGGGAATATTGGGCAATGGGCGCAAGCCTGACCCAGCAACGCCGCGTGAAGGATGAAGGCTTTCGGGTTGTAAACTTCTTTTATCAGGGACGAATTCTGACGGTACCTGATGAATAAGCC	Varmuzoba	Oscillospira	80% Study
a8a343291e520560d88535f218f21b53	CGGGTGGCTGCAGTGGGGAATATTGGGCAATGGGCGCAAGCCTGACCCAGCAACGCCGCGTGAAGGAAGAAGGCTTTCGGGTTGTAAACTTCTTTTGTCGGGGACGAAACAAATGACGGTACCCGACGAA	Varmuzoba	Oscillospira	80% Study
419185b9f26829135ce11ac7b630139c	CGGGCGGCTGCAGTGGGGAATATTGGGCAATGGGCGCAAGCCTGACCCAGCAACGCCGCGTGAAGGAAGAAGGCTTTCGGGTTGTAAACTTCTTTTGTCGGGGACGAAACAAATGACGGTACCCGACGAA	Varmuzoba	Oscillospira	80% Study
7a66b5318e75d23d967fa4b8fe8a2a7c	GAGGCAGCAGTGGGGAATATTGGGCAATGGGCGCAAGCCTGACCCAGCAACGCCGCGTGAAGGAAGAAGGCTTTCGGGTTGTAAACTTCTTTTGTCAGGGAACAGTAGAAGAGGGTACCTGACGAATAAG	Varmuzoba	Oscillospira	80% Study
a752dcfd1dc2a6d5a703612e6cd28fbc	GGGGCTGCAGTGGGGAATATTGGGCAATGGGCGCAAGCCTGACCCAGCAACGCCGCGTGAAGGAAGAAGGCCCTCGGGTTGTAAACTTCTTTTGTCAGGGACGAAGCAAGTGACGGTACCTGACGAATAA	Varmuzoba	Oscillospira	80% Study
69fc5a99d3e96dd38a8e7d442c8fb1b3	GTGGCTGCAGTGGGGAATATTGGGCAATGGGCGCAAGCCTGACCCAGCAACGCCGCGTGAAGGAAGAAGGCTTTCGGGTTGTAAACTTCTTTTGTCGGGGACGAAACAAATGACGGTACCCGACGAATAA	Varmuzoba	Oscillospira	80% Study
92ad7d57bf09dd4abab8fa40b8cf3513	GGGGCTGCAGTGGGGAATATTGGGCAATGGGCGCAAGCCTGACCCAGCAACGCCGCGTGAAGGAAGAAGGCTTTCGGGTTGTAAACTTCTTTTGTCGGGGACGAAACAAATGACGGTACCCGACGAATAA	Varmuzoba	Oscillospira	80% Study
38898fe6151c1321ea889aef9176b4b0	GAGGCAGCAGTGGGGAATATTGGGCAATGGGCGCAAGCCTGACCCAGCAACGCCGCGTGAAGGAAGAAGGCTTTCGGGTTGTAAACTTCTTTTGTCGGGGACGAAACAAATGACGGTACCTGACGAATAA	Varmuzoba	Oscillospira	80% Study
aaf6986f5c544a1a7ad1324462c26c47	CGGGAGGCAGCAGTGGGGAATATTGGGCAATGGGCGCAAGCCTGACCCAGCAACGCCGCGTGAAGGAAGAAGGCTTTCGGGTTGTAAACTTCTTTTGTCGGGGACGAAACAAATGACGGTACCTGACGAA	Varmuzoba	Oscillospira	80% Study
41bef327b8086d6ec1b4abc932bd3f5c	GGGGCAGCAGTGGGGAATATTGGGCAATGGGCGCAAGCCTGACCCAGCAACGCCGCGTGAAGGAAGAAGGCTTTCGGGTTGTAAACTTCTTTTGTCAGGGAACAGTAGAAGAGGGTACCTGACGAATAAG	Varmuzoba	Oscillospira	80% Study
658fd9290367495dcf05cb7e6098b0bf	GGGGCTGCAGTGGGGAATATTGGGCAATGGGCGCAAGCCTGACCCAGCAACGCCGCGTGAAGGAAGAAGGCTTTCGGGTTGTAAACTTCTTTTGTCAGGGAACAGTAGAAGAGGGTACCTGACGAATAAG	Varmuzoba	Oscillospira	80% Study
139ec78418b55f7b5a0c0e31eb8632cc	GGGGCTGCAGTGGGGAATATTGGGCAATGGGCGCAAGCCTGACCCAGCAACGCCGCGTGAAGGAAGAAGGCTTTCGGGTTGTAAACTTCTTTTGTCGGGGACGAAACAAATGACGGTACCTGACGAATAA	Varmuzoba	Oscillospira	80% Study
d566986336b5215af582f232e8ad9370	CGGGAGGCAGCAGTGGGGAATATTGGGCAATGGGCGCAAGCCTGACCCAGCAACGCCGCGTGAAGGATGAAGGCTTTCGGGTTGTAAACTTCTTTTATCAGGGACGAATTCTGACGGTACCTGATGAATA	Varmuzoba	Oscillospira	80% Study
2332a1d65fbd53a42f80608894363d97	AGGCAGCAGTGGGGAATATTGGGCAATGGGCGCAAGCCTGACCCAGCAACGCCGCGTGAAGGAAGAAGGCTTTCGGGTTGTAAACTTCTTTTGTCAGGGACGAACAAATGACGGTACCTGACGAATAAGC	Varmuzoba	Oscillospira	80% Study
5df7f5853d43d1b44107562cfddeb943	CGGGAGGCAGCAGTGGGGAATATTGCACAATGGGGGAAACCCTGATGCAGCGACGCCGCGTGAAGGAAGAAGTATCTCGGTATGTAAACTTCTATCAGCAGGGAAGAAAGTGACGGTACCTGACTAAGAA	Varmuzoba	Blautia	80% Study
2aa25953904e64dcfb904348bb2b072c	AGGCAGCAGTGGGGAATATTGCACAATGGGGGAAACCCTGATGCAGCGACGCCGCGTGAAGGAAGAAGTATCTCGGTATGTAAACTTCTATCAGCAGGGAAGAAAATGACGGTACCTGACTAAGAAGCCC	Varmuzoba	Blautia	80% Study
e42d99224665fe00925215344f1a87e6	AGGCTGCAGTGGGGAATATTGCACAATGGGGGAAACCCTGATGCAGCGACGCCGCGTGAAGGAAGAAGTATCTCGGTATGTAAACTTCTATCAGCAGGGAAGAAAATGACGGTACCTGACTAAGAAGCCC	Varmuzoba	Blautia	80% Study
8e443b6e116e78a6e6513cbd123433e7	GGGCAGCAGTGGGGAATATTGCACAATGGGGGAAACCCTGATGCAGCGACGCCGCGTGAAGGAAGAAGTATCTCGGTATGTAAACTTCTATCAGCAGGGAAGAAAATGACGGTACCTGACTAAGAAGCCC	Varmuzoba	Blautia	80% Study
0f944890629fa951164c91212ef288d9	GGGCTGCAGTGGGGAATATTGCACAATGGGGGAAACCCTGATGCAGCGACGCCGCGTGAAGGAAGAAGTATCTCGGTATGTAAACTTCTATCAGCAGGGAAGAAAATGACGGTACCTGACTAAGAAGCCC	Varmuzoba	Blautia	80% Study
e5580c7143588169d69b5b8080d17d6a	TGGCAGCAGTGGGGAATATTGCACAATGGGGGAAACCCTGATGCAGCGACGCCGCGTGAAGGAAGAAGTATCTCGGTATGTAAACTTCTATCAGCAGGGAAGAAAATGACGGTACCTGACTAAGAAGCCC	Varmuzoba	Blautia	80% Study
ff41d32b8ac2956039d329c2cb10274f	CGGGAGGCAGCAGTGGGGAATATTGCACAATGGGGGAAACCCTGATGCAGCGACGCCGCGTGAAGGAAGAAGTATCTCGGTATGTAAACTTCTATCAGCAGGGAAGAAAATGACGGTACCTGACTAAGAA	Varmuzoba	Blautia	80% Study
df128d310cbbbe10bb0b3a68470e08b7	CGGGTGGCAGCAGTGGGGAATATTGCACAATGGGGGAAACCCTGATGCAGCGACGCCGCGTGAAGGAAGAAGTATCTCGGTATGTAAACTTCTATCAGCAGGGAAGAAAATGACGGTACCTGACTAAGAA	Varmuzoba	Blautia	80% Study
8fbf9b8649d79df46f25b4b281c7ed6b	CGGGAGGCTGCAGTGGGGAATATTGCACAATGGGGGAAACCCTGATGCAGCGACGCCGCGTGAAGGAAGAAGTATCTCGGTATGTAAACTTCTATCAGCAGGGAAGAAAATGACGGTACCTGACTAAGAA	Varmuzoba	Blautia	80% Study
0e8a9b9adb898da366ac487f64ca6c1b	CGGGGGGCAGCAGTGGGGAATATTGCACAATGGGGGAAACCCTGATGCAGCGACGCCGCGTGAAGGAAGAAGTATCTCGGTATGTAAACTTCTATCAGCAGGGAAGAAAATGACGGTACCTGACTAAGAA	Varmuzoba	Blautia	80% Study
7ab0754598b891c1dc33d81c15a2140b	CGGCAGCAGTGGGGAATATTGCACAATGGGGGAAACCCTGATGCAGCGACGCCGCGTGAAGGAAGAAGTATCTCGGTATGTAAACTTCTATCAGCAGGGAAGAAAATGACGGTACCTGACTAAGAAGCCC	Varmuzoba	Blautia	80% Study
6ecf37c74f9f4f9898fa848333c5abbf	CTACGGGAGGCAGCAGTGGGGAATATTGCACAATGGGGGAAACCCTGATGCAGCGACGCCGCGTGAAGGAAGAAGTATCTCGGTATGTAAACTTCTATCAGCAGGGAAGAAAATGACGGTACCTGACTAA	Varmuzoba	Blautia	80% Study
5606a6a50a3921204ae4956b7b644cba	CTACGGGAGGCTGCAGTGGGGAATATTGCACAATGGGGGAAACCCTGATGCAGCGACGCCGCGTGAAGGAAGAAGTATCTCGGTATGTAAACTTCTATCAGCAGGGAAGAAAATGACGGTACCTGACTAA	Varmuzoba	Blautia	80% Study
13e2b8783edc9c2f0e3e95011895c6ca	CTACGGGGGGCAGCAGTGGGGAATATTGCACAATGGGGGAAACCCTGATGCAGCGACGCCGCGTGAAGGAAGAAGTATCTCGGTATGTAAACTTCTATCAGCAGGGAAGAAAATGACGGTACCTGACTAA	Varmuzoba	Blautia	80% Study
7db1f68aab21e81098896e6c4554a50a	GAGGCAGCAGTGGGGAATATTGCACAATGGGGGAAACCCTGATGCAGCGACGCCGCGTGAAGGAAGAAGTATCTCGGTATGTAAACTTCTATCAGCAGGGAAGAAAATGACGGTACCTGACTAAGAAGCC	Varmuzoba	Blautia	80% Study
eb92cd62ebc39076ebf8c90c5b3a51aa	GAGGCTGCAGTGGGGAATATTGCACAATGGGGGAAACCCTGATGCAGCGACGCCGCGTGAAGGAAGAAGTATCTCGGTATGTAAACTTCTATCAGCAGGGAAGAAAATGACGGTACCTGACTAAGAAGCC	Varmuzoba	Blautia	80% Study
e059973a77fae395643abe13ace3232f	GGGGCAGCAGTGGGGAATATTGCACAATGGGGGAAACCCTGATGCAGCGACGCCGCGTGAAGGAAGAAGTATCTCGGTATGTAAACTTCTATCAGCAGGGAAGAAAATGACGGTACCTGACTAAGAAGCC	Varmuzoba	Blautia	80% Study
e4f719308309c67fd8ec821543d19874	CTACGGGAGGCAGCAGTGGGGAATATTGCACAATGGGGGAAACCCTGATGCAGCGACGCCGCGTGAAGGAAGAAGTATCTCGGTATGTAAACTTCTATCAGCAGGGAAGAAAGTGACGGTACCTGACTAA	Varmuzoba	Blautia	80% Study
e97474000577585c384ae267bcdebb38	CTACGGGAGGCTGCAGTGGGGAATATTGCACAATGGGGGAAACCCTGATGCAGCGACGCCGCGTGAAGGAAGAAGTATCTCGGTATGTAAACTTCTATCAGCAGGGAAGAAAGTGACGGTACCTGACTAA	Varmuzoba	Blautia	80% Study
dd62c31522e66fe0ec60efe0ac9274c7	CTACGGGTGGCAGCAGTGGGGAATATTGCACAATGGGGGAAACCCTGATGCAGCGACGCCGCGTGAAGGAAGAAGTATCTCGGTATGTAAACTTCTATCAGCAGGGAAGAAAATGACGGTACCTGACTAA	Varmuzoba	Blautia	80% Study
7627b03f58c9cd55b09dfd594b98ae93	CAATGGGGGAAACCCTGATGCAGCGACGCCGCGTGAAGGAAGAAGTATCTCGGTATGTAAACTTCTATCAGCAGGGAAGAAAATGACGGTACCTGACTAAGAAGCCCCGGCTAACTACGTGCCAGCAGCC	Varmuzoba	Blautia	80% Study
e8dee8a199898c82327311a9a7288a9a	CGGGGGGCTGCAGTGGGGAATATTGCACAATGGGGGAAACCCTGATGCAGCGACGCCGCGTGAAGGAAGAAGTATCTCGGTATGTAAACTTCTATCAGCAGGGAAGAAAATGACGGTACCTGACTAAGAA	Varmuzoba	Blautia	80% Study
52c0ecc947ac780524556925ee85620c	GTGGCAGCAGTGGGGAATATTGCACAATGGGGGAAACCCTGATGCAGCGACGCCGCGTGAAGGAAGAAGTATCTCGGTATGTAAACTTCTATCAGCAGGGAAGAAAATGACGGTACCTGACTAAGAAGCC	Varmuzoba	Blautia	80% Study
01e67134ef4228c6f3b50d7ec12aa519	CGGGAGGCAGCAGTAGGGAATTTTCGGCAATGGGCGAAAGCCTGACCGAGCAACGCCGCGTGAAGGAAGAAGTCATTCGTGATGTAAACTTCTGTTATGAAGGAAGAACGGCAGATGGAGGGAATGCCAT	Varmuzoba	Coprobacillus	80% Study
acaa217dfa9e1c55c873a37fbe6d9114	CGGGAGGCTGCAGTAGGGAATTTTCGGCAATGGGCGAAAGCCTGACCGAGCAACGCCGCGTGAAGGAAGAAGTCATTCGTGATGTAAACTTCTGTTATGAAGGAAGAACGGCAGATGGAGGGAATGCCAT	Varmuzoba	Coprobacillus	80% Study
b52ef7d31e5b008564121687f3788711	CGGGTGGCTGCAGTAGGGAATTTTCGGCAATGGGCGAAAGCCTGACCGAGCAACGCCGCGTGAAGGAAGAAGTCATTCGTGATGTAAACTTCTGTTATGAAGGAAGAACGGCAGATGGAGGGAATGCCAT	Varmuzoba	Coprobacillus	80% Study
89b9d125907d8ac56a91104e0dd0bef8	CGGGTGGCAGCAGTAGGGAATTTTCGGCAATGGGCGAAAGCCTGACCGAGCAACGCCGCGTGAAGGAAGAAGTCATTCGTGATGTAAACTTCTGTTATGAAGGAAGAACGGCAGATGGAGGGAATGCCAT	Varmuzoba	Coprobacillus	80% Study
c3926a97fa61e02329617412f399d927	CGGGGGGCAGCAGTAGGGAATTTTCGGCAATGGGCGAAAGCCTGACCGAGCAACGCCGCGTGAAGGAAGAAGTCATTCGTGATGTAAACTTCTGTTATGAAGGAAGAACGGCAGATGGAGGGAATGCCAT	Varmuzoba	Coprobacillus	80% Study
e2275eeae30a1c354a838b9dc1b14176	CGGGGGGCTGCAGTAGGGAATTTTCGGCAATGGGCGAAAGCCTGACCGAGCAACGCCGCGTGAAGGAAGAAGTCATTCGTGATGTAAACTTCTGTTATGAAGGAAGAACGGCAGATGGAGGGAATGCCAT	Varmuzoba	Coprobacillus	80% Study
bf904baca409a862ca316bbaea584bbd	AGGCAGCAGTAGGGAATTTTCGGCAATGGGCGAAAGCCTGACCGAGCAACGCCGCGTGAAGGAAGAAGTCATTCGTGATGTAAACTTCTGTTATGAAGGAAGAACGGCAGATGGAGGGAATGCCATGTGC	Varmuzoba	Coprobacillus	80% Study
ebd9196defa5217c9824d46bebc7e9ea	TGGCTGCAGTAGGGAATTTTCGGCAATGGGCGAAAGCCTGACCGAGCAACGCCGCGTGAAGGAAGAAGTCATTCGTGATGTAAACTTCTGTTATGAAGGAAGAACGGCAGATGGAGGGAATGCCATGTGC	Varmuzoba	Coprobacillus	80% Study
09409bbe2765216878150aff1b1ab9a0	TGGCAGCAGTAGGGAATTTTCGGCAATGGGCGAAAGCCTGACCGAGCAACGCCGCGTGAAGGAAGAAGTCATTCGTGATGTAAACTTCTGTTATGAAGGAAGAACGGCAGATGGAGGGAATGCCATGTGC	Varmuzoba	Coprobacillus	80% Study
00362cd13c3b1ac2a52002ebeb48939b	AGGCTGCAGTAGGGAATTTTCGGCAATGGGCGAAAGCCTGACCGAGCAACGCCGCGTGAAGGAAGAAGTCATTCGTGATGTAAACTTCTGTTATGAAGGAAGAACGGCAGATGGAGGGAATGCCATGTGC	Varmuzoba	Coprobacillus	80% Study
ec4516be9a781ef847b74e65f32fedc1	GGGCAGCAGTAGGGAATTTTCGGCAATGGGCGAAAGCCTGACCGAGCAACGCCGCGTGAAGGAAGAAGTCATTCGTGATGTAAACTTCTGTTATGAAGGAAGAACGGCAGATGGAGGGAATGCCATGTGC	Varmuzoba	Coprobacillus	80% Study
dcedb86ff76e94cad7d23299f4858da1	GGGCTGCAGTAGGGAATTTTCGGCAATGGGCGAAAGCCTGACCGAGCAACGCCGCGTGAAGGAAGAAGTCATTCGTGATGTAAACTTCTGTTATGAAGGAAGAACGGCAGATGGAGGGAATGCCATGTGC	Varmuzoba	Coprobacillus	80% Study
eabd764e959d11db6db6882fdc8b96ae	CTACGGGGGGCAGCAGTAGGGAATTTTCGGCAATGGGCGAAAGCCTGACCGAGCAACGCCGCGTGAAGGAAGAAGTCATTCGTGATGTAAACTTCTGTTATGAAGGAAGAACGGCAGATGGAGGGAATGC	Varmuzoba	Coprobacillus	80% Study
3742b5c39aab7b223fc9dc2b2421692f	GAGGCTGCAGTAGGGAATTTTCGGCAATGGGCGAAAGCCTGACCGAGCAACGCCGCGTGAAGGAAGAAGTCATTCGTGATGTAAACTTCTGTTATGAAGGAAGAACGGCAGATGGAGGGAATGCCATGTG	Varmuzoba	Coprobacillus	80% Study
148047d60644b9776c47ae48ef50d368	GAGGCAGCAGTAGGGAATTTTCGGCAATGGGCGAAAGCCTGACCGAGCAACGCCGCGTGAAGGAAGAAGTCATTCGTGATGTAAACTTCTGTTATGAAGGAAGAACGGCAGATGGAGGGAATGCCATGTG	Varmuzoba	Coprobacillus	80% Study
d0381657ae27b129aebf9b8bf8ae5467	CTACGGGAGGCAGCAGTAGGGAATTTTCGGCAATGGGCGAAAGCCTGACCGAGCAACGCCGCGTGAAGGAAGAAGTCATTCGTGATGTAAACTTCTGTTATGAAGGAAGAACGGCAGATGGAGGGAATGC	Varmuzoba	Coprobacillus	80% Study
e63c91da0ae6a1d5827807fcf1de534c	CTACGGGAGGCTGCAGTAGGGAATTTTCGGCAATGGGCGAAAGCCTGACCGAGCAACGCCGCGTGAAGGAAGAAGTCATTCGTGATGTAAACTTCTGTTATGAAGGAAGAACGGCAGATGGAGGGAATGC	Varmuzoba	Coprobacillus	80% Study
f0369b07731e4a9245b09bc4b0fff924	CTACGGGTGGCAGCAGTAGGGAATTTTCGGCAATGGGCGAAAGCCTGACCGAGCAACGCCGCGTGAAGGAAGAAGTCATTCGTGATGTAAACTTCTGTTATGAAGGAAGAACGGCAGATGGAGGGAATGC	Varmuzoba	Coprobacillus	80% Study
75f805b826fef99944383a35a5b7d114	CGGCAGCAGTAGGGAATTTTCGGCAATGGGCGAAAGCCTGACCGAGCAACGCCGCGTGAAGGAAGAAGTCATTCGTGATGTAAACTTCTGTTATGAAGGAAGAACGGCAGATGGAGGGAATGCCATGTGC	Varmuzoba	Coprobacillus	80% Study
a97bb9c0cd8951cbbdcf99b337ddd74d	CGGGTGGCAGCAGTAGGGAATTTTCGGCAATGGGGGGAACCCTGACCGAGCAACGCCGCGTGAAGGAAGAAGGAATTCGTTCTGTAAACTTCTGTTATAAAGGAAGAACGGCGGATATAGGGAATGATAT	Varmuzoba	Clostridium	80% Study
4554d9651f2f01a3c0723a01a7c30167	CGGGAGGCTGCAGTAGGGAATTTTCGGCAATGGGGGGAACCCTGACCGAGCAACGCCGCGTGAAGGAAGAAGGAATTCGTTCTGTAAACTTCTGTTATAAAGGAAGAACGGCGGATATAGGGAATGATAT	Varmuzoba	Clostridium	80% Study
830be0b1b48a9e4c6cc5b806d7e9f500	CGGGAGGCAGCAGTAGGGAATTTTCGGCAATGGGGGGAACCCTGACCGAGCAACGCCGCGTGAAGGAAGAAGGAATTCGTTCTGTAAACTTCTGTTATAAAGGAAGAACGGCGGATATAGGGAATGATAT	Varmuzoba	Clostridium	80% Study
1208c004e537450d229c49821a689bf0	CGGGAGGCTGCAGTGGGGGATATTGCACAATGGGGGAAACCCTGATGCAGCGACGCCGCGTGAAGGAAGAAGGCCTTCGGGTTGTAAACTTCTGTCGTACGGGACGATAATGACGGTACCGTACAAGAAA	Varmuzoba	Clostridium	80% Study
86eadd2e646e39c0fbad0f7ec6f49ec4	AGGCTGCAGTAGGGAATTTTCGGCAATGGGGGGAACCCTGACCGAGCAACGCCGCGTGAAGGAAGAAGGAATTCGTTCTGTAAACTTCTGTTATAAAGGAAGAACGGCGGATATAGGGAATGATATCCGA	Varmuzoba	Clostridium	80% Study
c676c56bf7790bebb47406b34d6b3ea6	AGGCAGCAGTAGGGAATTTTCGGCAATGGGGGGAACCCTGACCGAGCAACGCCGCGTGAAGGAAGAAGGAATTCGTTCTGTAAACTTCTGTTATAAAGGAAGAACGGCGGATATAGGGAATGATATCCGA	Varmuzoba	Clostridium	80% Study
10970e7e8665db748c53a040e298b9aa	TGGCAGCAGTAGGGAATTTTCGGCAATGGGGGGAACCCTGACCGAGCAACGCCGCGTGAAGGAAGAAGGAATTCGTTCTGTAAACTTCTGTTATAAAGGAAGAACGGCGGATATAGGGAATGATATCCGA	Varmuzoba	Clostridium	80% Study
794cc4239b2365940a45ac5150c6faee	CGGCAGCAGTAGGGAATTTTCGGCAATGGGGGGAACCCTGACCGAGCAACGCCGCGTGAAGGAAGAAGGAATTCGTTCTGTAAACTTCTGTTATAAAGGAAGAACGGCGGATATAGGGAATGATATCCGA	Varmuzoba	Clostridium	80% Study
67ae94de275d6a7c072f10f3698cec5c	GGGCAGCAGTAGGGAATTTTCGGCAATGGGGGGAACCCTGACCGAGCAACGCCGCGTGAAGGAAGAAGGAATTCGTTCTGTAAACTTCTGTTATAAAGGAAGAACGGCGGATATAGGGAATGATATCCGA	Varmuzoba	Clostridium	80% Study
294d01021219668a1c7cb6ad6deadae0	CGGGAGGCAGCAGTGGGGAATATTGCACAATGGGCGAAAGCCTGATGCAGCAACGCCGCGTGAGTGATGACGGCCTTCGGGTTGTAAAACTCTGTCTTCAGGGACGATAATGACGGTACCTGAGGAGGAA	Varmuzoba	Clostridium	80% Study
cf84a87ac86767179ab7d5746769d697	TGGCAGCAGTGGGGAATATTGCACAATGGGGGGAACCCTGATGCAGCAACGCCGCGTGAAGGAAGAAGTATTTCGGTATGTAAACTTCTATCGACAGGGAAGAAAGAGATGACGGTACCTGAATAAGAAG	Varmuzoba	Clostridium	80% Study
adff7dd5a52ba38175b1f199f77d0dfa	GAGGCAGCAGTAGGGAATTTTCGGCAATGGGGGGAACCCTGACCGAGCAACGCCGCGTGAAGGAAGAAGGAATTCGTTCTGTAAACTTCTGTTATAAAGGAAGAACGGCGGATATAGGGAATGATATCCG	Varmuzoba	Clostridium	80% Study
881e244ab74e1027f88410a7f5c2ed53	GGGGCAGCAGTAGGGAATTTTCGGCAATGGGGGGAACCCTGACCGAGCAACGCCGCGTGAAGGAAGAAGGAATTCGTTCTGTAAACTTCTGTTATAAAGGAAGAACGGCGGATATAGGGAATGATATCCG	Varmuzoba	Clostridium	80% Study
124e6e5b021e856219fe7b027fcdf44f	GTGGCAGCAGTAGGGAATTTTCGGCAATGGGGGGAACCCTGACCGAGCAACGCCGCGTGAAGGAAGAAGGAATTCGTTCTGTAAACTTCTGTTATAAAGGAAGAACGGCGGATATAGGGAATGATATCCG	Varmuzoba	Clostridium	80% Study
0eb91706e8bd57bd80a64fc2fec26f4d	CTACGGGAGGCAGCAGTAGGGAATTTTCGGCAATGGGGGGAACCCTGACCGAGCAACGCCGCGTGAAGGAAGAAGGAATTCGTTCTGTAAACTTCTGTTATAAAGGAAGAACGGCGGATATAGGGAATGA	Varmuzoba	Clostridium	80% Study
e96162b8df386e9dbde206ff6555f67a	CTACGGGAGGCTGCAGTAGGGAATTTTCGGCAATGGGGGGAACCCTGACCGAGCAACGCCGCGTGAAGGAAGAAGGAATTCGTTCTGTAAACTTCTGTTATAAAGGAAGAACGGCGGATATAGGGAATGA	Varmuzoba	Clostridium	80% Study
5ba6089fb3658e552d12d07be0b67d6b	CTACGGGGGGCAGCAGTAGGGAATTTTCGGCAATGGGGGGAACCCTGACCGAGCAACGCCGCGTGAAGGAAGAAGGAATTCGTTCTGTAAACTTCTGTTATAAAGGAAGAACGGCGGATATAGGGAATGA	Varmuzoba	Clostridium	80% Study
dd31b643a75f017cade479dd6173253c	CAATGGGGGGAACCCTGACCGAGCAACGCCGCGTGAAGGAAGAAGGAATTCGTTCTGTAAACTTCTGTTATAAAGGAAGAACGGCACATATAGGGAATGATATGTGAGTGACGGTACTTTATGAGGAAGC	Varmuzoba	Clostridium	80% Study
9321087ecf09cb86298217874d2c7576	CTACGGGAGGCAGCAGTAGGGAATTTTCGGCAATGGGGGAAACCCTGACCGAGCAACGCCGCGTGAAGGAAGAAGGTTTTCGGATTGTAAACTTCTGTTATAAAGGAAGAACGGCGGCTACAGGAAATGG	Varmuzoba	Clostridium	80% Study
b052a0b49e9d5748e629b02456e7e42e	CTACGGGTGGCAGCAGTAGGGAATTTTCGGCAATGGGGGAAACCCTGACCGAGCAACGCCGCGTGAAGGAAGAAGGTTTTCGGATTGTAAACTTCTGTTATAAAGGAAGAACGGCGGCTACAGGAAATGG	Varmuzoba	Clostridium	80% Study
ceca744eafcb2fcdcb698a0419838f4a	CTACGGGAGGCTGCAGTAGGGAATTTTCGGCAATGGGGGAAACCCTGACCGAGCAACGCCGCGTGAAGGAAGAAGGTTTTCGGATTGTAAACTTCTGTTATAAAGGAAGAACGGCGGCTACAGGAAATGG	Varmuzoba	Clostridium	80% Study
d5b46f2068ed203968154ca06cfbed1c	CTACGGGGGGCAGCAGTAGGGAATTTTCGGCAATGGGGGAAACCCTGACCGAGCAACGCCGCGTGAAGGAAGAAGGTTTTCGGATTGTAAACTTCTGTTATAAAGGAAGAACGGCGGCTACAGGAAATGG	Varmuzoba	Clostridium	80% Study
c91a6e06a1810b0f90f2fe472b13a838	AGGCAGCAGTGGGGAATATTGCACAATGGGGGGAACCCTGATGCAGCAACGCCGCGTGAAGGAAGAAGTATTTCGGTATGTAAACTTCTATCGACAGGGAAGAAAAAGATGACGGTACCTGAATAAGAAG	Varmuzoba	Clostridium	80% Study
759fd9addb141bf420f6043e5d0d5994	GGGCAGCAGTAGGGAATTTTCGGCAATGGGGGAAACCCTGACCGAGCAACGCCGCGTGAAGGAAGAAGGTTTTCGGATTGTAAACTTCTGTTATAAAGGAAGAACGGCGGCTACAGGAAATGGTAGCCGA	Varmuzoba	Clostridium	80% Study
f96bc296c5d25d5412d44fa4b164d41f	AGGCAGCAGTAGGGAATTTTCGGCAATGGGGGAAACCCTGACCGAGCAACGCCGCGTGAAGGAAGAAGGTTTTCGGATTGTAAACTTCTGTTATAAAGGAAGAACGGCGGCTACAGGAAATGGTAGCCGA	Varmuzoba	Clostridium	80% Study
6db2dd02e26d0025ac4fc5d48be609b8	CGGGGGGCTGCAGTGGGGAATATTGCACAATGGGGGGAACCCTGATGCAGCAACGCCGCGTGAAGGAAGAAGTATTTCGGTATGTAAACTTCTATCGACAGGGAAGAAAAAGATGACGGTACCTGAATAA	Varmuzoba	Clostridium	80% Study
d93309c8795046752368c431c14e5322	CGGGAGGCTGCAGTGGGGAATATTGCACAATGGGGGGAACCCTGATGCAGCAACGCCGCGTGAAGGAAGAAGTATTTCGGTATGTAAACTTCTATCGACAGGGAAGAAAAAGATGACGGTACCTGAATAA	Varmuzoba	Clostridium	80% Study
ebb1eb3239bfc25a928f76aee268fbeb	AGGCAGCAGTGGGGAATATTGCACAATGGGGGAAACCCTGATGCAGCAACGCCGCGTGAGTGATGACGGCCTTCGGGTTGTAAAGCTCTGTCTTTGGGGACGATAATGACGGTACCCAAGGAGGAAGCCA	Varmuzoba	Clostridium	80% Study
07ec9b63edf876c4899fda7e99ffa1c3	CGGGAGGCTGCAGTGGGGAATATTGCACAATGGGCGAAAGCCTGATGCAGCAACGCCGCGTGAGTGATGACGGCCTTCGGGTTGTAAAACTCTGTCTTCAGGGACGATAATGACGGTACCTGAGGAGGAA	Varmuzoba	Clostridium	80% Study
76f609b0f97f0d237c612ed5743d7140	GGAGGCAGCAGTAGGGAATCTTCCACAATGGACGCAAGTCTGATGGAGCAACGCCGCGTGAGTGAAGAAGGTTTTCGGATCGTAAAGCTCTGTTGTTGGTGAAGAAGGATAGAGGTAGTAACTGGCCTTT	Xia	Lactobacillus	80% Study
2b6f10178c03d27fbd133326d096a81c	GGAGGCAGCAGTAGGGAATCTTCCACAATGGACGCAAGTCTGATGGAGCAACGCCGCGTGAGTGAAGAAGGTCTTCGGATCGTAAAACTCTGTTGTTAGAGAAGAACACGAGTGAGAGTAACTGTTCATT	Xia	Lactobacillus	80% Study
c6c7b549972467cde740d4b5277a0558	GGAGGCAGCAGTAGGGAATCTTCCACAATGGGCGCAAGCCTGATGGAGCAACGCCGCGTGAGTGAAGAAGGTCTTCGGATCGTAAAACTCTGTTGTTAGAGAAGAACATGCAGGAGAGTAACTGTTCTTG	Xia	Lactobacillus	80% Study
e903e6d9664f80a0b475c0c20e3f12ad	GGAGGCAGCAGTAGGGAATCTTCCACAATGGGCGCAAGCCTGATGGAGCAACGCCGCGTGAGTGAAGAAGGTCTTCGGATCGTAAAACTCTGTTGTTAGAGAAGAACATGCGAGAGAGTAACTGTTCTTG	Xia	Lactobacillus	80% Study
cd094bfbdb9fae9eed8176b70260b82b	GGAGGCAGCAGTAGGGAATCTTCCACAATGGACGAAAGTCTGATGGAGCAACGCCGCGTGAGTGAAGAAGGGTTTCGGCTCGTAAAGCTCTGTTGGTAGTGAAGAAAGATAGAGGTAGTAACTGGCCTTT	Xia	Lactobacillus	80% Study
6d4b53439b324947c06f0b6de1370b45	GGAGGCAGCAGTAGGGAATCTTCCACAATGGGCGCAAGCCTGATGGAGCAACACCGCGTGAGTGAAGAAGGGTTTCGGCTCGTAAAGCTCTGTTGTTGGAGAAGAACGTGCGTGAGAGTAACTGTTCACG	Xia	Lactobacillus	80% Study
c2a7f12ba131445ec67fa4fd69bc32a1	GGAGGCAGCAGTAGGGAATCTTCCACAATGGGCGCAAGCCTGATGGAGCAACGCCGCGTGAGTGAAGAAGGGTTTCGGCTCGTAAAACTCTGTTGTTAAAGAAGAACGAAGCGAAGAGTAACTGATTCGC	Xia	Lactobacillus	80% Study
961a29e182f5bd8014220d1f27001be6	GGAGGCAGCAGTAGGGAATCTTCCACAATGGACGCAAGTCTGATGGAGCAACGCCGCGTGAGTGAAGAAGGTCTTCGGATCGTAAAACTCTGTTGTTAGAGAAGAACACGAATGAGAGTAACTGTTCATT	Xia	Lactobacillus	80% Study
7dae96a7fdbf52182620d6ed2d177161	GGAGGCAGCAGTAGGGAATCTTCCACAATGGGCGCAAGCCTGATGGAGCAACACCGCGTGAGTGAAGAAGGGTTTCGGCTCGTAAAACTCTGTTGTTGAAGAAGAACGTGCGTGAGAGTAACTGTTCACG	Xia	Lactobacillus	80% Study
11484bfa8a3e50cb06ac043d53fb4c38	GGAGGCAGCAGTAGGGAATCTTCCACAATGGGCGCAAGCCTGATGGAGCAACACCGCGTGAGTGAAGAAGGGTTTCGGCTCGTAAAGCTCTGTTGTTGAAGAAGAATGTGCAAGAGAGTAACTGTTCTTG	Xia	Lactobacillus	80% Study
2fb584681603b71b0efb40c32bfa4f20	GGAGGCAGCAGTAGGGAGTCTTCCACAATGGGCGCAAGCCTGATGGAGCAACACCGCGTGAGTGAAGAAGGGTTTCGGCTCGTAAAGCTCTGTTGTTGGAGAAGAACGTGCGTGAGAGTAATTGTTCACG	Xia	Lactobacillus	80% Study
3b0a389c03b23824a87828a9967aa0e3	GGAGGCAGCAGTAGGGAATCTTCCACAATGGGCGCAAGCCTGATGGAGCAACACCGCGTGAGTGAAGAAGGGTTTCGGCTCGTAAAACTCTGTTGTTGGAGAAGAACGTGCGTAAGAGTAACTGTTTACG	Xia	Lactobacillus	80% Study
053c4dc9c2f05000fe970bb206da07b4	GGAGGCAGCAGTAGGGAATCTTCCACAATGGGCGCAAGCCTGATGGAGCAACACCGCGTGAGTGAAGAAGGGTTTCGGCTCGTAAAACTCTGTTGTTGGAGAAGAATGTGCGTAAGAGTAACTGTTTACG	Xia	Lactobacillus	80% Study
0cb1aa5e30815db502ebcfa619fa454e	CAATGGACGCAAGTCTGATGGAGCAACGCCGCGTGAGTGAAGAAGGTTTTCGGATCGTAAAGCTCTGTTGTTGGTGAAGAAGGATAGAGGTAGTAACTGGCCTTTATTTGACGGTAATCAACCAGAAAGT	Xia	Lactobacillus	80% Study
4f462d86e0499b5c08e7b30d1a943162	CAATGGACGCAAGTCTGATGGAGCAACGCCGCGTGAGTGAAGAAGGTCTTCGGATCGTAAAACTCTGTTGTTAGAGAAGAACACGAGTGAGAGTAACTGTTCATTCGATGACGGTATCTAACCAGCAAGT	Xia	Lactobacillus	80% Study
186c97b96872bfd647089ed053a5614f	GGAGGCAGCAGTAGGGAATCTTCCACAATGGACGAAAGTCTGATGGAGCAACGCCGCGTGAGTGAAGAAGGTTTTCGGATCGTAAAGCTCTGTTGTTGGTGAAGAAGGATAGAGGTAGTAACTGGCCTTT	Xia	Lactobacillus	80% Study
1895c560adeba7ebc6759891cec8908e	GGAGGCAGCAGTAGGGAATCTTCCACAATGGACGCAAGTCTGATGGAGCAACGCCGCGTGAGCGAAGAAGGTCTTCGGATCGTAAAACTCTGTTGTTAGAGAAGAACACGGGTGAGAGTAACTGTTCACC	Xia	Lactobacillus	80% Study
f1923f32a0871f0a2c7d1ce464d0025e	GGAGGCAGCAGTAGGGAATCTTCCACAATGGGCGCAAGCCTGATGGAGCAACACCGCGTGAGTGAAGAAGGGTTTCGGCTCGTAAAGCTCTGTTGTTGGAGAAGAACATGCGTGAGAGTAACTGTTCACG	Xia	Lactobacillus	80% Study
950e2db78aed813f0a1c3a120fabbd0d	GGAGGCAGCAGTGGGGAATATTGCACAATGGGGGAAACCCTGATGCAGCGACGCCGCGTGGAGGAAGAAGGTCTTCGGATTGTAAACTCCTGTTGTTGGGGAAAAGAAGGATGGTACCCAACAAGGAAGT	Xia	Faecalibacterium	80% Study
827130c70e4a2b4737dda9fa184e8676	GGAGGCAGCAGTGGGGAATATTGCACAATGGGGGAAACCCTGATGCAGCGACGCCGCGTGGAGGAAGAAGGTCTTCGGATTGTAAACTCCTGTTGTTGAGGAAAAAACGGATGGTACTCAACAAGGAAGT	Xia	Faecalibacterium	80% Study
6572f04e69ce689e8de0bec16ef02ce5	GGAGGCAGCAGTGGGGAATATTGCACAATGGGGGAAACCCTGATGCAGCGACGCCGCGTGGAGGAAGAAGGTCTTCGGATTGTAAACTCCTGTTGTTGAGGAAGAAAAGGACGGTACTCAACAAGGAAGT	Xia	Faecalibacterium	80% Study
591c25cbaea1757fa9df3293bfc60e02	GGAGGCAGCAGTGGGGAATATTGCACAATGGAGGAAACTCTGATGCAGCGACGCCGCGTGGAGGAAGAAGGTCTTCGGATTGTAAACTCCTGTTGTTGAGGAAAAAACGGATGGTACTCAACAAGGAAGT	Xia	Faecalibacterium	80% Study
723cea56b276b1bb0b6723a14de199ae	GGAGGCAGCAGTGGGGAATATTGCACAATGGGGGAAACCCTGATGCAGCGACGCCGCGTGGAGGAAGAAGGTCTTCGGATTGTAAACTCCTGTTGTTGGGGAAAATAAGGATGGTACCCAACAAGGAAGT	Xia	Faecalibacterium	80% Study
8620a7755826ff91bf0e49221d111607	GGAGGCAGCAGTGGGGAATATTGCACAATGGGGGAAACCCTGATGCAGCGACGCCGCGTGGAGGAAGAAGGTCTTCGGATTGTAAACTCCTGTTGTTGGGGAAAAAGAGGATGGTACCCAACAAGGAAGT	Xia	Faecalibacterium	80% Study
f273cc6116d03ee8a7ade000402a465e	GGAGGCAGCAGTGGGGAATATTGCACAATGGGGGAAACCCTGATGCAGCGACGCCGCGTGGAGGAAGAAGGTCTTCGGATTGTAAACTCCTGTTGTTGAGGAAAAAGAGGATGGTACTCAACAAGGAAGT	Xia	Faecalibacterium	80% Study
13b648b5dd07952a3c604bb0d257413c	GGAGGCAGCAGTGGGGAATATTGCACAATGGAGGAAACTCTGATGCAGCGACGCCGCGTGGAGGAAGAAGGTCTTCGGATTGTAAACTCCTGTTGTTGAGGACGATAATGACGGTACTCAACAAGGAAGT	Xia	Faecalibacterium	80% Study
928a3dd3c1156eeb0eb738dd3221a470	GGAGGCAGCAGTGGGGAATATTGCACAATGGGGGAAACCCTGATGCAGCGACGCCGCGTGGAGGAAGAAGGTCTTCGGATTGTAAACTCCTGTTGTTGAGGAAAATAAGGATGGTACTCAACAAGGAAGT	Xia	Faecalibacterium	80% Study
c8f3eb087b00cce32ab036eb6f3442c0	GGAGGCAGCAGTGGGGAATATTGCACAATGGGGGAAACCCTGATGCAGCGACGCCGCGTGGAGGAAGAAGGTCTTCGGATTGTAAACTCCTGTTGTTGGGGAAAAAGAAGGATGGTACCCAACAAGGAAG	Xia	Faecalibacterium	80% Study
9a412458a6dc5697a88c3cb511c15d74	CAATGGGGGAAACCCTGATGCAGCGACGCCGCGTGGAGGAAGAAGGTCTTCGGATTGTAAACTCCTGTTGTTGGGGAAAAGAAGGATGGTACCCAACAAGGAAGTGACGGCTAACTACGTGCCAGCAGCC	Xia	Faecalibacterium	80% Study
ac4bf7183c04f14dfe5ff5b33f9e199a	CAATGGGGGAAACCCTGATGCAGCGACGCCGCGTGGAGGAAGAAGGTCTTCGGATTGTAAACTCCTGTTGTTGAGGAAAAAGAGGATGGTACTCAACAAGGAAGTGACGGCTAACTACGTGCCAGCAGCC	Xia	Faecalibacterium	80% Study
4f363419a78a771969b7790a4691fc16	CAATGGGGGAAACCCTGATGCAGCGACGCCGCGTGGAGGAAGAAGGTCTTCGGATTGTAAACTCCTGTTGTTGGGGAAAAAGAGGATGGTACCCAACAAGGAAGTGACGGCTAACTACGTGCCAGCAGCC	Xia	Faecalibacterium	80% Study
e30187154cc27d5371be16c84a54f15a	GGAGGCAGCAGTGGGGAATATTGCACAATGGGGGAAACCCTGATGCGGCGACGCCGCGTGGAGGAAGAAGGTCTTCGGATTGTAAACTCCTGTTGTTGAGGAAAAAGAGGATGGTACTCAACAAGGAAGT	Xia	Faecalibacterium	80% Study
17de592fa21d417935d400ca972025ec	GGAGGCAGCAGTGGGGAATATTGCACAATGGGGGAAACCCTGATGCAGCGACGCCGCGTGGAGGAAGAAGGTCTTCGGATTGTAAACTCCTGTTGTTGGGGAAAAAACGGATGGTACCCAACAAGGAAGT	Xia	Faecalibacterium	80% Study
7156a0c0338c571f034f84476655e115	GGAGGCAGCAGTGGGGAATATTGGGCAATGGGCGCAAGCCTGACCCAGCAACGCCGCGTGAAGGAAGAAGGCTTTCGGGTTGTAAACTTCTTTTGTCAGGGAACAGTAGAAGAGGGTACCTGACGAATAA	Xia	Oscillospira	80% Study
ceef9e397656da863532c5d04b66c9d0	GGAGGCAGCAGTGGGGAATATTGGGCAATGGGCGAAAGCCTGACCCAGCAACGCCGCGTGAAGGAAGAAGGCTTTCGGGTTGTAAACTTCTTTTATCAGGGACGAAGGATGTGACGGTACCTGATGAATA	Xia	Oscillospira	80% Study
b74f14a14aad894ba5a509deb4a819fc	GGAGGCAGCAGTGGGGAATATTGGGCAATGGGCGCAAGCCTGACCCAGCAACGCCGCGTGAAGGAAGAAGGCTTTCGGGTTGTAAACTTCTTTTATTCGGGACGAAGAAATGACGGTACCGAATGAATAA	Xia	Oscillospira	80% Study
d922940b48c3ebe375a243a6d3bca901	GGAGGCAGCAGTGGGGAATATTGGGCAATGGGCGCAAGCCTGACCCAGCAACGCCGCGTGAAGGATGAAGGCCCTCGGGTTGTAAACTTCTTTTAACAGGGACGAATTCTGACGGTACCTGTTGAATAAG	Xia	Oscillospira	80% Study
902c149e8a620957e0f97b4d978b40fc	GGAGGCAGCAGTGGGGAATATTGGGCAATGGGCGCAAGCCTGACCCAGCAACGCCGCGTGAAGGAAGAAGGCCCTCGGGTTGTAAACTTCTTTTGTCAGGGACGAAGCAAGTGACGGTACCTGACGAATA	Xia	Oscillospira	80% Study
0f67816fb0e4a89ea7b86361c8255d98	GGAGGCAGCAGTGGGGAATATTGGGCAATGGGCGCAAGCCTGACCCAGCAACGCCGCGTGAAGGAAGAAGGCTTTCGGGTTGTAAACTTCTTTTCTCAGGGACGAAGGACGTGACGGTACCTGAGGAATA	Xia	Oscillospira	80% Study
0c0666f26620ce4b8e1870472f82b178	GGAGGCAGCAGTGGGGAATATTGGGCAATGGGCGAAAGCCTGACCCAGCAACGCCGCGTGAAGGAAGAAGGCTTTCGGGTTGTAAACTTCTTTTATCAGGGACGAAGTAGTGACGGTACCTGATGAATAA	Xia	Oscillospira	80% Study
f3319acaf8948bd8305c4ac8d62c88df	GGAGGCAGCAGTGGGGAATATTGGGCAATGGGCGCAAGCCTGACCCAGCAACGCCGCGTGAAGGAAGAAGGCTTTCGGGTTGTAAACTTCTTTTCTCAGGGACGAAACAAATGACGGTACCTGAGGAATA	Xia	Oscillospira	80% Study
125cdd04f9f0afb0fb51cc246e72a71f	GGAGGCAGCAGTGGGGAATATTGGGCAATGGGCGCAAGCCTGACCCAGCAACGCCGCGTGAAGGAAGAAGGCTCTCGGGTTGTAAACTTCTTTTATCAGGGACGAAGCAAGTGACGGTACCTGATGAATA	Xia	Oscillospira	80% Study
0a705e1f57e457ddf09a4e2f4730911e	GGAGGCAGCAGTGGGGAATATTGGGCAATGGGCGCAAGCCTGACCCAGCAACGCCGCGTGAAGGAAGAAGGCTTTCGGGTTGTAAACTTCTTTTGTCAGGGACGAAGCAAGTGACGGTACCTGACGAATA	Xia	Oscillospira	80% Study
882a80440da15194d7e6af3dbb4adc95	GGAGGCAGCAGTGGGGAATATTGGGCAATGGGCGCAAGCCTGACCCAGCAACGCCGCGTGAAGGAAGAAGGCTTTCGGGTTGTAAACTTCTTTTATTAAGGACGAAACAAATGACGGTACTTAATGAATA	Xia	Oscillospira	80% Study
e04c65bb1b78fd8ae7de1647a7f5d2b4	GGAGGCAGCAGTGGGGAATATTGGGCAATGGGCGCAAGCCTGACCCAGCAACGCCGCGTGAAGGAAGAAGGCTCTCGGGTTGTAAACTTCTTTTAAGAGGGACGAACACAATGACGGTACCTCTTGAATA	Xia	Oscillospira	80% Study
b2944be2cf4ffffa97d08fdc1be76be4	GGAGGCAGCAGTGGGGAATATTGGGCAATGGGCGCAAGCCTGACCCAGCAACGCCGCGTGAAGGAAGAAGGCTCTCGGGTTGTAAACTTCTTTTAAGAGGGACGAAACAAATGACGGTACCTCTTGAATA	Xia	Oscillospira	80% Study
104a9e19c48f9d6917b3851085a4e2a9	GGAGGCAGCAGTGGGGAATATTGGGCAATGGGCGCAAGCCTGACCCAGCAACGCCGCGTGAAGGAAGAAGGCTTTCGGGTTGTAAACTTCTTTTATTAAGGACGAAGCAATGACGGTACTTAATGAATAA	Xia	Oscillospira	80% Study
c15ce954563728aaec9cc1b908d2caa7	GGAGGCAGCAGTGGGGAATATTGGGCAATGGGCGCAAGCCTGACCCAGCAACGCCGCGTGAAGGAAGAAGGCTTTCGGGTTGTAAACTTCTTTTCTCAGGGACGAAGAAAATGACGGTACCTGAGGAATA	Xia	Oscillospira	80% Study
54488a34f3f163a48247579db04d2cd2	GGAGGCAGCAGTGGGGAATATTGGGCAATGGGCGCAAGCCTGACCCAGCAACGCCGCGTGAAGGAAGAAGGCTTTCGGGTTGTAAACTTCTTTTGTCAGGGACGAACAAATGACGGTACCTGACGAATAA	Xia	Oscillospira	80% Study
6869d3ea447af3ded0480edd4acc0418	GGAGGCAGCAGTGGGGAATATTGGGCAATGGGCGCAAGCCTGACCCAGCAACGCCGCGTGAAGGATGAAGGCTTTCGGGTTGTAAACTTCTTTTATCAGGGACGAAGAAAATGACGGTACCTGATGAATA	Xia	Oscillospira	80% Study
45383f22b8d304445a03a57ac85ee113	GGAGGCAGCAGTGGGGAATATTGGGCAATGGGCGCAAGCCTGACCCAGCAACGCCGCGTGAAGGATGAAGGCTTTCGGGTTGTAAACTTCTTTTATCAGGGACGAACAAAATGACGGTACCTGATGAATA	Xia	Oscillospira	80% Study
ccf4527944e1074ac865a433d4b71c1c	GGAGGCAGCAGTGGGGAATATTGGGCAATGGGCGCAAGCCTGACCCAGCAACGCCGCGTGAAGGATGAAGGCTTTCGGGTTGTAAACTTCTTTTGTCAGGGACGAAACAAATGACGGTACCTGACGAATA	Xia	Oscillospira	80% Study
92d541097039fae16711b0acde40734b	GGAGGCAGCAGTGGGGAATATTGGGCAATGGGCGCAAGCCTGACCCAGCAACGCCGCGTGAAGGAAGAAGGCTTTCGGGTTGTAAACTTCTTTTATTAAGGACGAAAGAAATGACGGTACTTAATGAATA	Xia	Oscillospira	80% Study
dcc389b4075cb76ef3e88abbb37e99f2	GGAGGCAGCAGTGGGGAATATTGGGCAATGGGCGCAAGCCTGACCCAGCAACGCCGCGTGAAGGAAGAAGGCTTTCGGGTTGTAAACTTCTTTTGTCAGGGAAGAGCAGAAGACTGTACCTGACGAATAA	Xia	Oscillospira	80% Study
2454f9e091e7484fc9e7b061930d1eca	GGAGGCAGCAGTGGGGAATATTGGGCAATGGACGCAAGTCTGACCCAGCAACGCCGCGTGAAGGAAGAAGGCTTTCGGGTTGTAAACTTCTTTTGTCAGGGAAGAGCAGAAGACGGTACCTGACGAATAA	Xia	Oscillospira	80% Study
26918cc9fe3e6a2d1c1fa3f4fefccc60	GGAGGCAGCAGTGGGGAATATTGGGCAATGGGCGCAAGCCTGACCCAGCAACGCCGCGTGAAGGATGAAGGCTTTCGGGTTGTAAACTTCTTTTATTCGGGACGAAGAAAATGACGGTACCGAATGAATA	Xia	Oscillospira	80% Study
ea2e6b1617dd40d0cdda6c09d239f83a	GGAGGCAGCAGTGGGGAATATTGGGCAATGGACGCAAGTCTGACCCAGCAACGCCGCGTGAAGGAAGAAGGCTTTCGGGTTGTAAACTTCTTTTGTCAGGGAACAGTAGAAGAGGGTACCTGACGAATAA	Xia	Oscillospira	80% Study
d6fd8de8dbc463f63771feca8cd6b462	GGAGGCAGCAGTGGGGAATATTGGGCAATGGGCGCAAGCCTGACCCAGCAACGCCGCGTGAAGGAAGAAGGCCCTCGGGTTGTAAACTTCTTTTGACAGGGACGAAACAAATGACGGTACCTGTCGAATA	Xia	Oscillospira	80% Study
293d4a671e21a87a27ce33821aa1d2f7	GGAGGCAGCAGTGGGGAATATTGGGCAATGGGCGCAAGCCTGACCCAGCAACGCCGCGTGAAGGAAGAAGGCTCTCGGGTTGTAAACTTCTTTTAAGAGGGACGAACGCAATGACGGTACCTCTTGAATA	Xia	Oscillospira	80% Study
5a20a6a5c7aa59eadb47b08095a4414e	GGAGGCAGCAGTGGGGAATATTGGGCAATGGGCGCAAGCCTGACCCAGCAACGCCGCGTGAAGGAAGAAGGCCCTCGGGTTGTAAACTTCTTTTGACAGGGACGAAGAAAATGACGGTACCTGTCGAATA	Xia	Oscillospira	80% Study
d3f39658c1c986d1e4597d5fbe428fdc	GGAGGCAGCAGTGGGGAATATTGGGCAATGGGCGCAAGCCTGACCCAGCAACGCCGCGTGAAGGAAGAAGGCTTTCGGGTTGTAAACTTCTTTTCTCAGGGACGAAGCAAGTGACGGTACCTGAGGAATA	Xia	Oscillospira	80% Study
3f55250af33cd370acfa0ba17d703639	GGAGGCAGCAGTGGGGAATATTGGGCAATGGGCGCAAGCCTGACCCAGCAACGCCGCGTGAAGGAAGAAGGCCCTCGGGTTGTAAACTTCTTTTAACAGGGACGAAGCAAGTGACGGTACCTGTTGAATA	Xia	Oscillospira	80% Study
12d29b24c7b2ab2d5fe53f9cf7b84e3f	GGAGGCAGCAGTGGGGAATATTGGGCAATGGGCGCAAGCCTGACCCAGCAACGCCGCGTGAAGGATGAAGGCTTTCGGGTTGTAAACTTCTTTTATCAGGGACGAATTCTGACGGTACCTGATGAATAAG	Xia	Oscillospira	80% Study
d9b35028fd33a37111638adbc1012e7e	GGAGGCAGCAGTGGGGAATATTGGGCAATGGGCGCAAGCCTGACCCAGCAACGCCGCGTGAAGGAAGAAGGCTTTCGGGTTGTAAACTTCTTTTGTCGGGGACGAAACAAATGACGGTACCCGACGAATA	Xia	Oscillospira	80% Study
9164ce58da1d46ed1274474eaaad70e0	GGAGGCAGCAGTGGGGAATATTGGGCAATGGGCGCAAGCCTGACCCAGCAACGCCGCGTGAAGGAAGAAGGCTTTCGGGTTGTAAACTTCTTTTATCAGGGACGAAATAAATGACGGTACCTGATGAATA	Xia	Oscillospira	80% Study
997c0215fceba74ce70e3cbb98bb26cf	GGAGGCAGCAGTGGGGAATATTGGGCAATGGGCGCAAGCCTGACCCAGCAACGCCGCGTGAAGGAAGAAGGCTTTCGGGTTGTAAACTTCTTTTGTCAGGGACGAAACAAATGACGGTACCTGACGAATA	Xia	Oscillospira	80% Study
f40b16c47377ad4e14621eac3df173f6	GGAGGCAGCAGTGGGGAATATTGGGCAATGGGCGCAAGCCTGACCCAGCAACGCCGCGTGAAGGATGAAGGCTTTCGGGTTGTAAACTTCTTTTATTCGGGACGAAGCAAGTGACGGTACCGAATGAATA	Xia	Oscillospira	80% Study
4e303c35dfaf307a4b5bd5aed5837801	GGAGGCAGCAGTGGGGAATATTGGGCAATGGGCGCAAGCCTGACCCAGCAACGCCGCGTGAAGGAAGAAGGCCCTCGGGTTGTAAACTTCTTTTATCAGGGACGAAGCAAGTGACGGTACCTGATGAATA	Xia	Oscillospira	80% Study
65317726e354a82f4ef92dc96bff5f93	GGAGGCAGCAGTGGGGAATATTGGGCAATGGGCGCAAGCCTGACCCAGCAACGCCGCGTGAAGGAAGAAGGCTCTCGGGTTGTAAACTTCTTTTGTCAGGGACGAACACAATGACGGTACCTGACGAATA	Xia	Oscillospira	80% Study
36f7f9c865af11a773254f9f535b2842	GGAGGCAGCAGTGGGGAATATTGGGCAATGGGCGCAAGCCTGACCCAGCAACGCCGCGTGAAGGAAGAAGGCTCTAGGGTTGTAAACTTCTTTTAAGAGGGACGAAGTAAGTGACGGTACCTCTTGAATA	Xia	Oscillospira	80% Study
0c44c5df90882626781061ae0dd8b9f4	GGAGGCAGCAGTGGGGAATATTGGGCAATGGGCGCAAGCCTGACCCAGCAACGCCGCGTGAAGGATGAAGGCTTTCGGGTTGTAAACTTCTTTTATTCGGGACGAAGCAAATGACGGTACCGAATGAATA	Xia	Oscillospira	80% Study
0550a026eba2070b3aaecd3406c5be25	GGAGGCAGCAGTGGGGAATATTGGGCAATGGGCGCAAGCCTGACCCAGCAATGCCGCGTGAAGGAAGAAGGCTTTCGGGTTGTAAACTTCTTTTGTCAGGGAAGAGTAGAAGACGGTACCTGACGAATAA	Xia	Oscillospira	80% Study
b85c078a9967ac9039251ed9a6a47a43	GGAGGCAGCAGTGGGGAATATTGGGCAATGGGCGCAAGCCTGACCCAGCAACGCCGCGTGAAGGATGAAGGCTTTCGGGTTGTAAACTTCTTTTATTCGGGACGAAACAAATGACGGTACCGAATGAATA	Xia	Oscillospira	80% Study
857eb07dfe96c79b87a17a253a8beacf	GGAGGCAGCAGTGGGGAATATTGGGCAATGGGCGCAAGCCTGACCCAGCAACGCCGCGTGAAGGATGAAGGCTTTCGGGTTGTAAACTTCTTTTATCAGGGACGAACAAATGACGGTACCTGATGAATAA	Xia	Oscillospira	80% Study
23228fe2396e89389e4d837a74769320	GGAGGCAGCAGTGGGGAATATTGGGCAATGGGCGCAAGCCTGACCCAGCAACGCCGCGTGAAGGAAGAAGGCCCTCGGGTTGTAAACTTCTTTTAACAGGGACGAAGTAAGTGACGGTACCTGTTGAATA	Xia	Oscillospira	80% Study
24e4f2cbad0fb06a9da9f6d7d745632c	GGAGGCAGCAGTGGGGAATATTGGGCAATGGGCGCAAGCCTGACCCAGCAACGCCGCGTGAAGGATGAAGGCTTTCGGGTTGTAAACTTCTTTTATCAGGGACGAAATAAATGACGGTACCTGATGAATA	Xia	Oscillospira	80% Study
fdb879447526d3cbcbc19735ee78a7b5	CAATGGGCGCAAGCCTGACCCAGCAACGCCGCGTGAAGGAAGAAGGCCCTCGGGTTGTAAACTTCTTTTGTCAGGGACGAAGCAAGTGACGGTACCTGACGAATAAGCCACGGCTAACTACGTGCCAGCA	Xia	Oscillospira	80% Study
82da4148485d6eb448efa10e42ec1d47	CAATGGGCGCAAGCCTGACCCAGCAACGCCGCGTGAAGGAAGAAGGCTTTCGGGTTGTAAACTTCTTTTGTCAGGGAACAGTAGAAGAGGGTACCTGACGAATAAGCCACGGCTAACTACGTGCCAGCAG	Xia	Oscillospira	80% Study
d7ff55a70157b9e88fa3cb92636e1cf6	CAATGGGCGAAAGCCTGACCCAGCAACGCCGCGTGAAGGAAGAAGGCTTTCGGGTTGTAAACTTCTTTTATCAGGGACGAAGGATGTGACGGTACCTGATGAATAAGCCACGGCTAACTACGTGCCAGCA	Xia	Oscillospira	80% Study
e8848b3dc781ce19d2bd7bce9c4fdd7a	CAATGGGCGCAAGCCTGACCCAGCAACGCCGCGTGAAGGAAGAAGGCTTTCGGGTTGTAAACTTCTTTTGTCAGGGACGAACAAATGACGGTACCTGACGAATAAGCCACGGCTAACTACGTGCCAGCAG	Xia	Oscillospira	80% Study
968dfccd3413010d45f277037c37f70f	CAATGGGCGCAAGCCTGACCCAGCAACGCCGCGTGAAGGAAGAAGGCTTTCGGGTTGTAAACTTCTTTTGTCAGGGAACAGTAGAAGAGGGTACCTGACGAATAAGCTCCGGCTAACTACGTGCCAGCAG	Xia	Oscillospira	80% Study
f1dc1342e68dbf404ee037deacbe7b93	CAATGGGCGCAAGCCTGACCCAGCAACGCCGCGTGAAGGAAGAAGGCTTTCGGGTTGTAAACTTCTTTTGTCAGGGAAGAGGAGAAGACTGTACCTGACGAATAAGCTCCGGCTAACTACGTGCCAGCAG	Xia	Oscillospira	80% Study
fa1815ef7d6a72eb8e6a6060b3960f31	CAATGGGCGCAAGCCTGACCCAGCAACGCCGCGTGAAGGAAGAAGGCTTTCGGGTTGTAAACTTCTTTTATTCGGGACGATAGTGACGGTACCGAATGAATAAGCCACGGCTAACTACGTGCCAGCAGCC	Xia	Oscillospira	80% Study
078e7befe5ed38e1d46644bb93805858	CAATGGGCGAAAGCCTGACCCAGCAACGCCGCGTGAAGGAAGAAGGCTTTCGGGTTGTAAACTTCTTTTATCAGGGACGAAGTAGTGACGGTACCTGATGAATAAGCTCCGGCTAACTACGTGCCAGCAG	Xia	Oscillospira	80% Study
50c6ad36b44679ed3432f29cae3aeaf9	CAATGGGCGCAAGCCTGACCCAGCAACGCCGCGTGAAGGAAGAAGGCTTTCGGGTTGTAAACTTCTTTTCTTAGGGACGAAGGAAGTGACGGTACCTAAGGAATAAGCTCCGGCTAACTACGTGCCAGCA	Xia	Oscillospira	80% Study
883c45fb8e42f84d665cbfe49b27972c	CAATGGGCGCAAGCCTGACCCAGCAACGCCGCGTGAAGGAAGAAGGCTTTCGGGTTGTAAACTTCTTTTCTTGGGGACGAAACAAATGACGGTACCTAAGGAATAAGCTCCGGCTAACTACGTGCCAGCA	Xia	Oscillospira	80% Study
833c369f9867ad1ae128212a3f5d3439	CAATGGGCGCAAGCCTGACCCAGCAACGCCGCGTGAAGGAAGAAGGCTTTCGGGTTGTAAACTTCTTTTGTCAGGGAAGATGAAAGAGACTGTACCTGACGAATAAGCCACGGCTAACTACGTGCCAGCA	Xia	Oscillospira	80% Study
a2de5a82fbe20bd5a562892b3260b387	CAATGGACGCAAGTCTGACCCAGCAACGCCGCGTGAAGGAAGAAGGCTTTCGGGTTGTAAACTTCTTTTGTCAGGGAACAGTAGAAGAGGGTACCTGACGAATAAGCCACGGCTAACTACGTGCCAGCAG	Xia	Oscillospira	80% Study
1039e01fbbd09d024e085c66093311ef	CAATGGGCGCAAGCCTGACCCAGCAACGCCGCGTGAAGGAAGAAGGCTTTCGGGTTGTAAACTTCTTTTATTCGGGACGAAGCAAGTGACGGTACCGAATGAATAAGCCACGGCTAACTACGTGCCAGCA	Xia	Oscillospira	80% Study
6013f2d680276a29488635d7857b5d11	CAATGGGCGCAAGCCTGACCCAGCAACGCCGCGTGAAGGAAGAAGGCTTTCGGGTTGTAAACTTCTTTTGTCAGGGAAGATGAACGAGACTGTACCTGACGAATAAGCCACGGCTAACTACGTGCCAGCA	Xia	Oscillospira	80% Study
f4b00c9979f4b79f4a30e72c43f103bc	GGAGGCAGCAGTGGGGAATATTGGGCAATGGGCGCAAGCCTGACCCAGCAACGCCGCGTGAAGGAAGAAGGCCCTCGGGTTGTAAACTTCTTTTGACAGGGACGAACAAGGTGACGGTACCTGTCGAATA	Xia	Oscillospira	80% Study
be97b827fd617c99e540210ca30edb5e	GGAGGCAGCAGTGGGGAATATTGCACAATGGGGGAAACCCTGATGCAGCGACGCCGCGTGAAGGAAGAAGTATCTCGGTATGTAAACTTCTATCAGCAGGGAAGAAAATGACGGTACCTGACTAAGAAGC	Xia	Blautia	80% Study
d525d5d1da277d5bac49610485dbe3f4	GGAGGCAGCAGTGGGGAATATTGCACAATGGGGGAAACCCTGATGCAGCGACGCCGCGTGAAGGAAGAAGTATCTCGGTATGTAAACTTCTATCAGCAGGGAAGAAAGTGACGGTACCTGACTAAGAAGC	Xia	Blautia	80% Study
7627b03f58c9cd55b09dfd594b98ae93	CAATGGGGGAAACCCTGATGCAGCGACGCCGCGTGAAGGAAGAAGTATCTCGGTATGTAAACTTCTATCAGCAGGGAAGAAAATGACGGTACCTGACTAAGAAGCCCCGGCTAACTACGTGCCAGCAGCC	Xia	Blautia	80% Study
73e9a61455e33041de03dd8c62aca18c	GGAGGCAGCAGTGGGGGATATTGCACAATGGGGGAAACCCTGATGCAGCGACGCCGCGTGGAGGAAGAAGGTTTTCGGATTGTAAACTCCTGTCGTTAGGGACGATAATGACGGTACCTAACAAGAAAGC	Xia	Gemmiger	80% Study
294d3c06b9e0c21f7d66a22157e71fcc	GGAGGCAGCAGTGGGGGATATTGCACAATGGGGGAAACCCTGATGCAGCGACGCCGCGTGGAGGAAGAAGGTTTTCGGATTGTAAACTCCTGTCGTACGGGACGATAATGACGGTACCGTACAAGAAAGC	Xia	Gemmiger	80% Study
f4783192236f01bf98cbef4c483886c2	GGAGGCAGCAGTGGGGGATATTGCACAATGGGGGAAACCCTGATGCAGCGACGCCGCGTGGAGGAAGAAGGTTTTCGGATTGTAAACTCCTGTCGTAAGGGACGATAATGACGGTACCTTACAAGAAAGC	Xia	Gemmiger	80% Study
84480ba61fa7e912b1e3f2789328a71b	GGAGGCAGCAGTGGGGAATATTGCGCAATGGGGGCAACCCTGACGCAGCAACGCCGCGTGATTGATGAAGGTCTTCGGATTGTAAAAATCTTTAATCAGGGACGAAACAAATGACGGTACCTGAAGAATA	Xia	Butyricicoccus	80% Study
8488c2ddf40bc19bc28d2b7b2f09ff52	GGAGGCAGCAGTGGGGAATATTGCGCAATGGGGGCAACCCTGACGCAGCAACGCCGCGTGATTGAAGAAGGTCTTCGGATTGTAAAAATCTTTAATCAGGGACGAAGAAAATGACGGTACCTGAAGAATA	Xia	Butyricicoccus	80% Study
fa4260870124d3058176997c121f2336	GGAGGCAGCAGTGGGGAATATTGCGCAATGGGGGCAACCCTGACGCAGCAACGCCGCGTGATTGAAGAAGGTCTTCGGATTGTAAAAATCTTTAATCAGGGACGAAAAAAATGACGGTACCTGAAGAATA	Xia	Butyricicoccus	80% Study
b976214599508b2cb6efea4b286ffaa0	GGAGGCAGCAGTAGGGAATTTTCGGCAATGGGGGGAACCCTGACCGAGCAACGCCGCGTGAAGGAAGAAGGAATTCGTTCTGTAAACTTCTGTTATAAAGGAAGAACGGCACATATAGGGAATGATATGT	Xia	Clostridium	80% Study
e18e3be82a215371bb7996f3a7927818	GGAGGCAGCAGTAGGGAATTTTCGGCAATGGGGGGAACCCTGACCGAGCAACGCCGCGTGAAGGAAGAAGGAATTCGTTCTGTAAACTTCTGTTATAAAGGAAGAACGGCGGATATAGGGAATGATATCC	Xia	Clostridium	80% Study
f76b9191e9f92ed4a6f33140876b01b9	GGAGGCAGCAGTGGGGAATATTGCACAATGGGGGAAACCCTGATGCAGCGACGCCGCGTGAAGGAAGAAGGCCTTCGGGTTGTAAACTTCTGTCGTAAGGGACGATAATGACGGTACCTTACAAGAAAGC	Xia	Clostridium	80% Study
4a6f19337308b6945e32764d464fb4a8	GGAGGCAGCAGTGGGGAATATTGCACAATGGGGGAAACCCTGATGCAGCAACGCCGCGTGAGTGATGACGGCCTTCGGGTTGTAAAGCTCTGTCTTCAGGGACGATAATGACGGTACCTGAGGAGGAAGC	Xia	Clostridium	80% Study
18fc15c698f3934092220e76a182952d	GGAGGCAGCAGTAGGGAATTTTCGGCAATGGGGGGAACCCTGACCGAGCAACGCCGCGTGAAGGAAGAAGGAATTCGTTCTGTAAACTTCTGTTATAAAGGAAGAAAGGATGCCGGAGGGAATGCCGGCA	Xia	Clostridium	80% Study
239966be21fa707a10536dbf8c323f00	GGAGGCAGCAGTAGGGAATTTTCGGCAATGGGGGGGAACCCTGACCGAGCAACGCCGCGTGAAGGAAGAAGGAATTCGTTCTGTAAACTTCTGTTATAAAGGAAGAACGGCACATATAGGGAATGATATG	Xia	Clostridium	80% Study
0ca686c27f866f11e02fb0669a350cd8	GGAGGCAGCAGTAGGGAATTTTCGGCAATGGGCGAAAGCCTGACCGAGCAACGCCGCGTGAAGGAAGAAGGAATTCGTTCTGTAAACTTCTGTTATAAAGGAAGAACGGCACATATAGGGAATGATATGT	Xia	Clostridium	80% Study
dd31b643a75f017cade479dd6173253c	CAATGGGGGGAACCCTGACCGAGCAACGCCGCGTGAAGGAAGAAGGAATTCGTTCTGTAAACTTCTGTTATAAAGGAAGAACGGCACATATAGGGAATGATATGTGAGTGACGGTACTTTATGAGGAAGC	Xia	Clostridium	80% Study
96d5ca0364db91768086088e2d4125ab	GGAGGCAGCAGTGGGGAATATTGCACAATGGGGGAAACCCTGATGCAGCAACGCCGCGTGAGTGATGAAGGTTTTCGGATCGTAAAGCTCTGTCTTTGGGGAAGATAATGACGGTACCCAAGGAGGAAGC	Xia	Clostridium	80% Study
e46e6544f0642d1c95f91f0076a463f2	GGAGGCAGCAGTGGGGAATATTGCACAATGGGGGGAACCCTGATGCAGCAACGCCGCGTGAAGGAAGAAGTATTTCGGTATGTAAACTTCTATCGACAGGGAAGAAAGAGATGACGGTACCTGAATAAGA	Xia	Clostridium	80% Study
7ac6c4d505abcf768b74e98c6a6015a4	GGAGGCAGCAGTGGGGAATATTGCACAATGGGGGGAACCCTGATGCAGCAACGCCGCGTGAAGGAAGAAGTATTTCGGTATGTAAACTTCTATCGATAGGGAAGAAACAAATGACGGTACCTAAATAAGA	Xia	Clostridium	80% Study
3a34a70037eb9922370c00a3e1c11862	GGAGGCAGCAGTAGGGAATTTTCGGCAATGGGCGAAAGCCTGACCGAGCAACGCCGCGTGAAGGAAGAAGTCATTCGTGATGTAAACTTCTGTTATGAAGGAAGAACGGCAGATGGAGGGAATGCCATGT	Xia	Coprobacillus	80% Study
9883290c3f02a8df8c9a76f58d9acabd	GGAGGCAGCAGTAGGGAATTTTCGGCAATGGGCGAAAGCCTGACCGAGCAACGCCGCGTGAAGGAAGAAGTCATTCGTGATGTAAACTTCTGTTATAAAGGAAGAACGGCGCCTGTAGGGAATGACAGGC	Xia	Coprobacillus	80% Study
eec00b58822dbda8fc3f0d199ef74579	GGAGGCAGCAGTGGGGGATATTGCACAATGGAGGAAACTCTGATGCAGCGACGCCGCGTGAGGGAAGACGGTCTTCGGATTGTAAACCTCTGTCTTTAGGGACGAAAAAATGACGGTACCTAAGGAGGAA	Xia	Ethanoligenens	80% Study
3d2fc4f6179ebebd90f9444ba090325a	GGAGGCAGCAGTGGGGGATATTGCACAATGGAGGAAACTCTGATGCAGCGACGCCGCGTGAGGGAAGACGGTCTTCGGATTGTAAACCTCTGTCTTTAGGGACGAAAAAAATGACGGTACCTAAGGAGGA	Xia	Ethanoligenens	80% Study
be28a9a573477bc7bb9da55461f22b50	GGAGGCAGCAGTGGGGGATATTGCACAATGGAGGAAACTCTGATGCAGCGACGCCGCGTGAGGGAAGACGGTCTTCGGATTGTAAACCTCTGTCTTTAGGGAAGAAGATGACGGTACCTAAAGAGGAAGC	Xia	Ethanoligenens	80% Study
ef3881dd3ec2d26ef55f91cac17cdab6	CAATGGAGGAAACTCTGATGCAGCGACGCCGCGTGAGGGAAGACGGTCTTCGGATTGTAAACCTCTGTCTTTAGGGACGAAAAAATGACGGTACCTAAGGAGGAAGCCACGGCTAACTACGTGCCAGCAG	Xia	Ethanoligenens	80% Study
52adb3e6368c18a2b14870ff0adf2d04	GGAGGCAGCAGTGGGGGATATTGCGCAATGGGGGCAACCCTGACGCAGCAACGCCGCGTGAACGATGAAGGTCTTCGGATTGTAAAGTTCTTTTATTAAGGACGAAGAAGTGACGGTACTTAATGAATAA	Xia	Ruminococcus	80% Study
6356f473e5f548dc25ad10c3bf0dec10	GGAGGCAGCAGTGGGGGATATTGCACAATGGAGGAAACTCTGATGCAGCAACGCCGCGTGAGGGATGAAGGTTTTCGGATTGTAAACCTCTGTCCTTAGTGAAGAACATAATGACGGTAACTAAGGAGGA	Xia	Ruminococcus	80% Study
61f5372ab882ab90eeabab3e88445d3a	GGAGGCAGCAGTGAGGGATATTCGGCAATGGGGGAAACCCTGACCGAGCAACGCCGCGTGAGGGAAGACGGTTTTCGGATTGTAAACCTCTGTCCTCTGTGAAGATAGTGACGGTAGCAGAGGAGGAAGC	Xia	Ruminococcus	80% Study
0b174e83ead7f2a89ececedfb942b5af	GGAGGCAGCAGTGAGGGATATTGGTCAATGGGGGAAACCCTGAACCAGCAACGCCGCGTGAGGGATGACGGTCTTCGGATTGTAAACCTCTGTCCTCTGTGAAGATAATGACGGTAGCAGAGGAGGAAGC	Xia	Ruminococcus	80% Study
87ad764e1946da1e0753d8c3150b1153	GGAGGCAGCAGTGGGGGATATTGCACAATGGGGGAAACCCTGATGCAGCAACGCCGCGTGAGGGAAGACGGTTTTCGGATTGTAAACCTCTGTCCTTGGTGACGATAATGACGGTAGCCAAGAAGGAAGC	Xia	Ruminococcus	80% Study
1d6c95176d2354f9babcc0d6924763e9	GGAGGCAGCAGTGGGGGATATTGCACAATGGGGGAAACCCTGATGCAGCAACGCCGCGTGAGGGAAGAAGGTTTTCGGATTGTAAACCTCTGTCCTTGGTGACGATAATGACGGTAGCCAAGGAGGAAGC	Xia	Ruminococcus	80% Study
e1169443f223618563ca4b769f25db13	GGAGGCAGCAGTGGGGGATATTGCACAATGGGGGAAACCCTGATGCAGCAACGCCGCGTGTGGGAAGAAGGTTTTCGGATTGTAAACCACTGTTCTTGGTGAAGATAATGACGGTAACCAAGGAGAAAGC	Xia	Ruminococcus	80% Study
e186ad209daff1e7f61f93debb16ce69	GGAGGCAGCAGTGAGGGATATTGGTCAATGGGGGAAACCCTGAACCAGCAACGCCGCGTGAGGGAAGACGGTTTTCGGATTGTAAACCTCTGTCCTCTGTGAAAATAATGATGGTAGCAGAGGAGGAAGC	Xia	Ruminococcus	80% Study
04ed3ee088b5dc0cdf94ff17eaeacfcb	GGAGGCAGCAGTGAGGGATATTGGTCAATGGGGGAAACCCTGAACCAGCAACGCCGCGTGAGGGAAGACGGTTTTCGGATTGTAAACCTCTGTCCTCTGTGAAAATAGTGATGGTAGCAGAGGAGGAAGC	Xia	Ruminococcus	80% Study
07974458d45aa678ce7ddf1180fc525f	GGAGGCAGCAGTGGGGGATATTGCACAATGGGGGAAACCCTGATGCAGCAACGCCGCGTGAGGGAAGAAGGTTTTCGGATTGTAAACCTCTGTCTTTGGTGAAGAAGAAAGTGACGGTAACCAAGGAGGA	Xia	Ruminococcus	80% Study
0211b4ca7f53205891c49ade94d36d94	CAATGGGGGAAACCCTGAACCAGCAACGCCGCGTGAGGGAAGACGGTTTTCGGATTGTAAACCTCTGTCCTCTGTGAAAATGATGATGGTAGCAGAGGAGGAAGCTCCGGCTAACTACGTGCCAGCAGCC	Xia	Ruminococcus	80% Study
7070839791184b2a7eeff2b000d108fa	GGAGGCAGCAGTAGGGAATTTTCGTCAATGGGGGGAACCCTGAACGAGCAATGCCGCGTGAGTGAAGAAGGTCTTCGGATCGTAAAGCTCTGTTGTAAGAGAAAAAGGGCGCATATAGGAAATGATATGC	Xia	cc_115	80% Study
8903b2b4dc342e590ea55ce856566bf1	GGAGGCAGCAGTAGGGAATTTTCGTCAATGGGGGGAACCCTGAACGAGCAATGCCGCGTGAGTGAAGAAGGTCTTCGGATCGTAAAGCTCTGTTGTAAGAGAAAAACGGACTCCATAGGGAATGATGGAG	Xia	cc_115	80% Study
3b8f4a3db2f22ea5290960c5ae01b280	GGAGGCAGCAGTAGGGAATTTTCGTCAATGGGGGGAACCCTGAACGAGCAATGCCGCGTGAGTGAAGAAGGTCTTCGGATCGTAAAGCTCTGTTGTAAGAGAAAAAGGACGCATATAGGAAATGATATGC	Xia	cc_115	80% Study
55579e8e116e529fa2e213ef046211d5	GGAGGCAGCAGTAGGGAATTTTCGTCAATGGGGGGAACCCTGAACGAGCAATGCCGCGTGAGTGAAGAAGGTCTTCGGATCGTAAAGCTCTGTTGTAAGAGAAAAACGGTCTCCATAGGGAATGATGGAG	Xia	cc_115	80% Study
b09842cf804218d54e64502d4f890e3d	GGAGGCAGCAGTAGGGAATTTTCGTCAATGGGGGGAACCCTGAACGAGCAATGCCGCGTGAGCGAAGAAGGTCTTCGGATCGTAAAGCTCTGTTGTAAGAGAAAAACGAGCGCCATAGGGAATGATGGAG	Xia	cc_115	80% Study
8cdb07b839440d13023d431298a08ac3	GGAGGCAGCAGTAGGGAATCTTCGGCAATGGACGCAAGTCTGACCGAGCAACGCCGCGTGAGTGAAGAAGGTTTTCGGATCGTAAAACTCTGTTGTTAGAGAAGAACAAGGATGAGAGTGGAAAGTTCAT	Xia	Enterococcus	80% Study
a2074cec1fcceb9449ec227cb4193588	GGAGGCAGCAGTAGGGAATCTTCGGCAATGGACGAAAGTCTGACCGAGCAACGCCGCGTGAGTGAAGAAGGTTTTCGGATCGTAAAACTCTGTTGTTAGAGAAGAACAAGGATGAGAGTAACTGTTCATC	Xia	Enterococcus	80% Study
3079e1b94cf12bbc701e7fd805f74508	GGAGGCAGCAGTAGGGAATCTTCGGCAATGGACGAAAGTCTGACCGAGCAACGCCGCGTGAGTGAAGAAGGTTTTCGGATCGTAAAACTCTGTTGTTAGAGAAGAACAAGGATGAGAGTAGAACGTTCAT	Xia	Enterococcus	80% Study
7e53a3ae18d9303bc3d66cff9889a3b0	GGAGGCAGCAGTAGGGAATCTTCGGCAATGGACGAAAGTCTGACCGAGCAACGCCGCGTGAGTGAAGAAGGTTTTCGGATCGTAAAACTCTGTTGTTAGAGAAGAACAAGGATGAGAGTAAAATGTTCAT	Xia	Enterococcus	80% Study
a8d3640a8f090d15ec38444ff4e4691b	GGAGGCAGCAGTGGGGGATATTGCACAATGGAGGAAACTCTGATGCAGCGACGCCGCGTGAGGGAAGACGGTCTTCGGATTGTAAACCTCTGTCTTAGGGGAAGAAGATGACGGTACCCTAAGAGGAAGC	Xia	Anaerotruncus	80% Study
aad3a4c6e7515847d2ebe52da3aee250	GGAGGCAGCAGTGGGGGATATTGCACAATGGGCGAAAGCCTGATGCAGCGACGCCGCGTGAGGGAAGACGGTCTTCGGATTGTAAACCTCTGTCTTTGGGGAAGAAAATGACGGTACCCAAAGAGGAAGC	Xia	Anaerotruncus	80% Study
a541d64ce6985ff18f70847e97564ed7	CAATGGAGGAAACTCTGATGCAGCGACGCCGCGTGAGGGAAGACGGTCTTCGGATTGTAAACCTCTGTCTTAGGGGAAGAAGATGACGGTACCCTAAGAGGAAGCTCCGGCTAACTACGTGCCAGCAGCC	Xia	Anaerotruncus	80% Study
f14bb1889f274d0baa77663c2f18ce00	AGCGTAGACGGCCGTTTAAGTCAGCTGTGAAATGGTGCGGCTCAACCGTAGCACTGCAGTTGAAACTGGACGGCTTGAGTGCAGTTGAGGCAGGCGGAATTCGTGGTGTAGCGGTGAAATGCTTAGATAT	Xu	Bacteroides	80% Study
6cf584cd649d11493e8ec8786a97adf7	AGCGTAGACGGCGGTTTAAGTCAGCTGTGAAATGGTGCGGCTCAACCGTAGCACTGCAGTTGAAACTGGACGGCTTGAGTGCAGTTGAGGCAGGCGGAATTCGTGGTGTAGCGGTGAAATGCTTAGATAT	Xu	Bacteroides	80% Study
13a8e386d8981f1a6d9d69519eb4607c	AGCGCAGACGGCCCCTTAAGTCAGCTGTGAAAGTTTGCGGCTCAACCGTAAAATTGCAGTTGAAACTGTGGGGCTTGAGTACGGTCGCGGCATGCGGAATTCGTGGTGTAGCGGTGAAATGCATAGATAT	Xu	Bacteroides	80% Study
1d080e78bb67a0b0c1dbe23cc509d49a	AGCGCAGACGGGAGATTAAGTCAGTTGTGAAAGTTTGCGGCTCAACCGTAAAATTGCAGTTGATACTGGTTTCCTTGAGTGCAGTTGAGGCAGGCGGAATTCGTGGTGTAGCGGTGAAATGCTTAGATAT	Xu	Bacteroides	80% Study
9fc9c6fa73dde43b31411c79e93f907f	AGCGTAGACGGGATGTCAAGTCAGCTGTGAAAGTTTGCGGCTCAACCGTAAAATTGCAGTTGAAACTGGCTTTCTTGAGTGCGTTCGAGGCAGGCGGAATTCGTGGTGTAGCGGTGAAATGCATAGATAT	Xu	Bacteroides	80% Study
2131c2a524ccebe3d561d1982de49d35	AGCGTAGACGGGATGTCAAGTCAGCTGTGAAAGTTTGCGGCTCAACCGTAAAATTGCAGTTGAAACTGGCTTTCTTGAGTGCGGCAGAGGCAGGCGGAATTCGTGGTGTAGCGGTGAAATGCTTAGATAT	Xu	Bacteroides	80% Study
c9b4b7b7b4efc9d966745554588802dc	AGCGTAGACGGCCGTTTAAGTCAGCTGTGAAATGGTGCGGCTCAACCGTAGCACTGCAGTTGAAACTGGTCGGCTTGAGTGCAGTTGAGGCAGGCGGAATTCGTGGTGTAGCGGTGAAATGCTTAGATAT	Xu	Bacteroides	80% Study
85000441161687ef7a632446223468d0	AGCGCAGACGGGAGGGTAAGTCAGCTGTGAAAGTTTGCGGCTCAACCGTAAAATTGCAGTTGAAACTGTCTTTCTTGAGTGCGGCAGAGGCAGGCGGAATTCGTGGTGTAGCGGTGAAATGCTTAGATAT	Xu	Bacteroides	80% Study
f1e3d7b200267485f3535814473a563e	AGCGTAGACGGGTCCTTAAGTCAGTTGTGAAAGTTTGCGGCTCAACCGTAAAATTGCAGTTGATACTGGGGACCTTGAGTGCGGCAGAGGCAGGCGGAATTCGTGGTGTAGCGGTGAAATGCTTAGATAT	Xu	Bacteroides	80% Study
f9312655def98466f7c2a770d6120028	AGCGCAGACGGGTCGTTAAGTCAGCTGTGAAAGTTTGGGGCTCAACCTTAAAATTGCAGTTGATACTGGCGTCCTTGAGTGCGGTTGAGGTGTGCGGAATTCGTGGTGTAGCGGTGAAATGCTTAGATAT	Xu	Bacteroides	80% Study
24ad4e52ed6260d62ec1d6565189fa92	AGCGTAGACGGGATGTCAAGTCAGCTGTGAAAGTTTGCGGCTCAACCGTAGAATTGCAGTTGAAACTGGCGTTCTTGAGTGCGTTCGAGGCAGGCGGAATTCGTGGTGTAGCGGTGAAATGCATAGATAT	Xu	Bacteroides	80% Study
625941adddbeb0cf920fd8e7b05317bb	AGCGTAGACGGGTTTTTAAGTCAGCTGTGAAAGTTTGGGGCTCAACCTTAAAATTGCAGTTGAAACTGGAGACCTTGAGTACGGTTGAGGCAGGCGGAATTCGTGGTGTAGCGGTGAAATGCTTAGATAT	Xu	Bacteroides	80% Study
784257f8a74ffc9e2f8a0b3528edb5b5	AGCGCAGACGGGCGATTAAGTCAGTTGTGAAAGTTCGCGGCTCAACCGTGAAATTGCAGTTGAAACTGGTTGCCTTGAGTGCGGCAGAGGCAGGCGGAATTCGTGGTGTAGCGGTGAAATGCTTAGATAT	Xu	Bacteroides	80% Study
2578f2fa1df3d695c7e48e39f722fca0	AGCGTAGACGGGATGTTAAGTCAGCTGTGAAAGTTTGGGGCTCAACCTTAAAATTGCAGTTGAAACTGGCGTTCTTGAGTGCGGTAGAGGCAGGCGGAATTCGTGGTGTAGCGGTGAAATGCTTAGATAT	Xu	Bacteroides	80% Study
bd3b590065a6496681ce919066ceb513	AGCGCAGACGGTCGTTTAAGTCAGCTGTGAAATGGTGCGGCTCAACCGTAGCACTGCAGTTGAAACTGGACGGCTCGAGTGCGGCCGAGGTATGCGGAATTCGTGGTGTAGCGGTGAAATGCTTAGATAT	Xu	Bacteroides	80% Study
4ba5e7c4ecf619d91002338025f7f554	AGCGTAGGCGGGCTTTTAAGTCAGTTGTGAAAGTTTGCGGCTCAACCGTAAAATTGCAGTTGATACTGGAAGCCTTGAGTACAGTATAGGCAGGCGGAATTCGTGGTGTAGCGGTGAAATGCTTAGATAT	Xu	Bacteroides	80% Study
859ba87c8252b52ad33d4ff3f70c8a18	AGCGTAGGCGGGTTTTTAAGTCAGTTGTGAAAGTTTGCGGCTCAACCGTAAAATTGCAGTTGATACTGGAAGCCTTGAGTGCGGCAGAGGCAGGCGGAATTCGTGGTGTAGCGGTGAAATGCTTAGATAT	Xu	Bacteroides	80% Study
52521337ad8ddb69bca386dfb4a7c99a	AGCGTAGGCGGGTTTTTAAGTCAGTTGTGAAAGTTTGCGGCTCAACCGTAAAATTGCAGTTGAAACTGGAAGCCTTGAGTGCGGCAGAGGCAGGCGGAATTCGTGGTGTAGCGGTGAAATGCTTAGATAT	Xu	Bacteroides	80% Study
57e969278dff2f61e1cb57df3d74e472	AGCGTAGACGGGTCCTTAAGTCAGTTGTGAAAGTTTGCGGCTCAACCGTAAAATTGCAGTTGATACTGGGGGCCTTGAGTGCGGCAGAGGCAGGCGGAATTCGTGGTGTAGCGGTGAAATGCTTAGATAT	Xu	Bacteroides	80% Study
471ee6b4238b1cb0b40c7821324d91b7	AGCGTAGACGGGTTGTTAAGTCAGTTGTGAAAGTTTGCGGCTTAACCGTAAAATTGCAGTTGATACTGGCGACCTTGAGTGCGGCAGAGGAAGGCGGAATTCGTGGTGTAGCGGTGAAATGCTTAGATAT	Xu	Bacteroides	80% Study
1ee54c55d551d2bd7300983d67fa25c3	AGCGTAGGCGGGCGTTTAAGTCAGTTGTGAAAGTTTGCGGCTCAACCGTAAAATTGCAGTTGATACTGGATGCCTTGAGTGCGGCAGAGGCAGGCGGAATTCGTGGTGTAGCGGTGAAATGCTTAGATAT	Xu	Bacteroides	80% Study
9eadb6eddc516a2120607dec27b6ce45	AGCGTAGACGGGCGTTTAAGTCAGTTGTGAAAGTTCGCGGCTCAACCGTGAAATTGCAGTTGATACTGGGCGCCTTGAGTGCGGCAGAGGCAGGCGGAATTCGTGGTGTAGCGGTGAAATGCTTAGATAT	Xu	Bacteroides	80% Study
5feb82df619b754023731488a4504115	AGCGTAGGCGGGATGCTAAGTCAGTTGTGAAAGTTTGAGGCTCAACCTTAAAATTGCAGTTGATACTGGTGTTCTTGAGTGCGGTAGAGGCGTGCGGAATTCGTGGTGTAGCGGTGAAATGCTTAGATAT	Xu	Bacteroides	80% Study
0e8fed11dc2e543aa498c3a6ed921e97	AGCGTAGGCCGGTTTTTAAGTCAGTTGTGAAAGTTTGGGGCTCAACCTTAAAATTGCAGTTGAAACTGGAGACCTTGAGTGCGGTATAGGCAGGCGGAATTCGTGGTGTAGCGGTGAAATGCTTAGATAT	Xu	Bacteroides	80% Study
8348875dcfbc674809c7ec22ae49f620	AGCGCAGGCGGATGTTTAAGTCAGTTGTGAAATGCCCCGGCTCAACCGGGGGACTGCAGTTGATACTGGACGTCTTGAGTGCGGCAGAGGCAGGCGGAATTCGTGGTGTAGCGGTGAAATGCTTAGATAT	Xu	Bacteroides	80% Study
1c0b496c77de6bfdf15a675181db739f	AGCGCAGGCGGATGTTTAAGTCAGTTGTGAAATACCCCGGCTCAACCGGGGGACTGCAGTTGATACTGGACGTCTTGAGTGCGGCAGAGGCAGGCGGAATTCGTGGTGTAGCGGTGAAATGCTTAGATAT	Xu	Bacteroides	80% Study
57e6eff51c1fc683ca5aa20364373a68	AGCGTAGGCGGGTTTTTAAGTCAGTTGTGAAAGTTTGCGGCTCAACCGTAAAATTGCAGTTGATACTGGAAGCCTTGAGTACAGTAGAGGCAGGCGGAATTCGTGGTGTAGCGGTGAAATGCTTAGATAT	Xu	Bacteroides	80% Study
400360c9165bcd025c07a939f72e62c9	CAATGGGCGAGAGCCTGAACCAGCCAAGTAGCGTGAAGGATGACTGCCCTACGGGTTGTAAACTTCTTTTATAAGGGAATAAAGTATTCTACGTGTAGAGTTTTGTATGTACCTTATGAATAAGCATCGG	Xu	Bacteroides	80% Study
e7c65418afc8909cb84084ffe91d55d3	CAATGGGCGAGAGCCTGAACCAGCCAAGTAGCGTGAAGGATGACTGCCCTACGGGTTGTAAACTTCTTTTATAAGGGAATAAAGTTCTCTACGTGTAGAGTTTTGTATGTACCTTATGAATAAGCATCGG	Xu	Bacteroides	80% Study
4eed35f3dafbcb34876fa75c83e91d96	CAATGGACGAGAGTCTGAACCAGCCAAGTAGCGTGAAGGATGAAGGTCCTACGGATTGTAAACTTCTTTTATAAGGGAATAAACCCTCCCACGTGTGGGAGCTTGTATGTACCTTATGAATAAGCATCGG	Xu	Bacteroides	80% Study
1bf62f2fbff25cd3ac158e2d065339b7	CAATGGGCGAGAGCCTGAACCAGCCAAGTAGCGTGAAGGATGACTGCCCTATGGGTTGTAAACTTCTTTTATACGGGAATAACACCTTCCACGTGTGGAGGGCTGCATGTACCGTATGAATAAGCATCGG	Xu	Bacteroides	80% Study
1558cc9de8364d8d57288078190b78b1	CAATGGGCGAGAGCCTGAACCAGCCAAGTAGCGTGAAGGATGACTGCCCTATGGGTTGTAAACTTCTTTTATACGGGAATAACACGCGGCACGTGTGCCGCTCTGCATGTACCGTATGAATAAGCATCGG	Xu	Bacteroides	80% Study
522b3bb04a687c8e9f1687f703d9f0e5	CAATGGGCGAGAGCCTGAACCAGCCAAGTAGCGTGAAGGATGACGGCCCTACGGGTTGTAAACTTCTTTTGTGCGGGAATAAAGGAGCCTACGTGTAGGCTTTTGCATGTACCGTAACGAATAAGCATCG	Xu	Bacteroides	80% Study
327ae0ddb5399f2a8bf13f2b68ce036d	CAATGGGCGAGAGCCTGAACCAGCCAAGTAGCGTGAAGGATGACTGCCCTATGGGTTGTAAACTTCTTTTATACGGGAATAACATCATCCACGTGTGGGTGTCTGCATGTACCGTATGAATAAGCATCGG	Xu	Bacteroides	80% Study
65e95f1b3eca715843c916386580164d	CAATGGGCGAGAGCCTGAACCAGCCAAGTAGCGTGAAGGAAGACTGCCCTATGGGTTGTAAACTTCTTTTATACGGGAATAAAGTCATCCACGTGTGGATGTTTGTATGTACCGTATGAATAAGGATCGG	Xu	Bacteroides	80% Study
f5aec87f6388c3f0d59bbef91c443ccb	CAATGGACGAGAGTCTGAACCAGCCAAGTAGCGTGAAGGATGAAGGTCCTACGGATTGTAAACTTCTTTTATAAGGGAATAAAACCTTCCACGTGTGGGAGCTTGTATGTACCTTATGAATAAGCATCGG	Xu	Bacteroides	80% Study
01e8756bd32a90dfcdd18a01e771510c	CAATGGACGAGAGTCTGAACCAGCCAAGTAGCGTGAAGGACGACTGCCCTATGGGTTGTAAACTTCTTTTATATGGGAATAAAAAAGTCCACGTGTGGATTCTTGTATGTACCATATGAATAAGCATCGG	Xu	Bacteroides	80% Study
393f4701dca1b3649c4b0e55176e45ba	CGTGTAGGCGGGATTGCAAGTCAGATGTGAAAACCACGGGCTCAACCTGTGGCCTGCATTTGAAACTGCAGTTCTTGAGTACTGGAGAGGCAGACGGAATTCCTAGTGTAGCGGTGAAATGCGTAGATAT	Xu	Oscillospira	80% Study
bf4cdd8ad072d7020297cffadc174c4a	CGTGCAGCCGGGCTGGTAAGTCAGATGTGAAATCCGTGGGCTCAACCCGCGAACTGCATTTGAAACTGCTGGTCTTGAGTACCGGAGAGGTTATCGGAATTCCTTGTGTAGCGGTGAAATGCGTAGATAT	Xu	Oscillospira	80% Study
802359f85fc9a616c770e397ea1ae673	CGTGTAGGCGGGATTGCAAGTCAGATGTGAAAACCACGGGCTCAACCTGTGGCCTGCATTTGAAACTGTAGTTCTTGAGTACTGGAGAGGCAGACGGAATTCCTAGTGTAGCGGTGAAATGCGTAGATAT	Xu	Oscillospira	80% Study
918bbd43d9fbf22fc054a810a5e94a80	CGTGTAGCCGGGAAGACAAGTCAGATGTGAAATCTGGAGGCTCAACCTCCAAACTGCATTTGAAACTGTTTTTCTTGAGTATCGGAGAGGTAATCGGAATTCCTAGTGTAGCGGTGAAATGCGTAGATAT	Xu	Oscillospira	80% Study
bacd25946445cc042595c8aed73defe6	CGTGTAGGCGGGCTGGCAAGTCAGATGTGAAAACCATGGGCTCAACCCATGGCCTGCATTTGAAACTGTTGGTCTTGAGTGCTGGAGAGGCAATCGGAATTCCGTGTGTAGCGGTGAAATGCGTAGATAT	Xu	Oscillospira	80% Study
fa84c70e00f2714b1f5959185ce83a5f	CGTGTAGGCGGGACTGCAAGTCAGATGTGAAAACCACGGGCTCAACCTGTGGCCTGCATTTGAAACTGTAGTTCTTGAGTGTCGGAGAGGCAATCGGAATTCCGTGTGTAGCGGTGAAATGCGTAGATAT	Xu	Oscillospira	80% Study
f1a326685cceaa3fdc388c9196b68582	CGTGTAGGCGGGACTGCAAGTCAGGTGTGAAAACCACGGGCTCAACCTGTGGCCTGCATTTGAAACTGTAGTTCTTGAGTGCTGGAGAGGCAATCGGAATTCCGTGTGTAGCGGTGAAATGCGTAGATAT	Xu	Oscillospira	80% Study
907c6963dc7ae42d2c153a3fc6a6f6db	CGTGTAGGCGGGACTGCAAGTCAGATGTGAAAACCACGGGCTCAACCTGTGGCCTGCATTTGAAACTGTAGTTCTTGAGTACTGGAGAGGCAGACGGAATTCCTAGTGTAGCGGTGAAATGCGTAGATAT	Xu	Oscillospira	80% Study
6fecbe650326797c9aa2dd4c767ee623	CGTGTAGGCGGGATGGCAAGTCAGATGTGAAAACCATGGGCTCAACCCATGGCCTGCATTTGAAACTGTCGTTCTTGAGTACTGGAGAGGCAGACGGAATTCCTAGTGTAGCGGTGAAATGCGTAGATAT	Xu	Oscillospira	80% Study
bfeab280d02a6222945767c4bf9e8995	CGTGTAGGCGGGACTGCAAGTCAGGCGTGAAAACCATGGGCTCAACCCATGGCCTGCGTTTGAAACTGTAGTTCTTGAGTACTGGAGAGGCAGACGGAATTCCTAGTGTAGCGGTGAAATGCGTAGATAT	Xu	Oscillospira	80% Study
f43edc77d4c269f70d91f0ad5d83076c	CGTGTAGGCGGGATTGCAAGTCAGATGTGAAAACCAGGGGCTCAACCTCTGGCCTGCATTTGAAACTGTAGTTCTTGAGTACTGGAGAGGCAGACGGAATTCCTAGTGTAGCGGTGAAATGCGTAGATAT	Xu	Oscillospira	80% Study
a98a2c9452a8b89a696653b1cca491c2	CGTGTAGGCGGGATTGCAAGTCAGATGTGAAAACTGGAGGCTCAACCTCCAGCCTGCATTTGAAACTGTAGTTCTTGAGTACTGGAGAGGCAGACGGAATTCCTAGTGTAGCGGTGAAATGCGTAGATAT	Xu	Oscillospira	80% Study
8b6a352961e41284050c37764977fc80	CGTGTAGGCGGGAGTGCAAGTCAGATGTGAAAACTATGGGCTCAACCCATAGCCTGCATTTGAAACTGTACTTCTTGAGTACTGGAGAGGCAGGCGGAATTCCGTGTGTAGCGGTGAAATGCGTAGATAT	Xu	Oscillospira	80% Study
0ed8f2f6f52ca7e71300cb2525126d84	CGTGTAGGCGGGATTGCAAGTCAGATGTGAAAACCATGGGCTCAACTCATGGCCTGCATTTGAAACTGTAGTTCTTGAGTACTGGAGAGGCAGACGGAATTCCTAGTGTAGCGGTGAAATGCGTAGATAT	Xu	Oscillospira	80% Study
e931df86035787cfae00638e90f2030e	CGTGTAGCCGGGAAGGCAAGTCAGATGTGAAATCCGTGGGCTTAACCCACGAACTGCATTTGAAACTGTTTTTCTTGAGTACTGGAGAGGCAGACGGAATTCCTAGTGTAGCGGTGAAATGCGTAGATAT	Xu	Oscillospira	80% Study
9ce8ca013b64953cf638469e2b4df372	CGTGTAGGCGGGACTGCAAGTCAGATGTGAAAACCATGGGCTCAACCCATGGCCTGCATTTGAAACTGTAGTTCTTGAGTGCTGGAGAGGCAATCGGAATTCCGTGTGTAGCGGTGAAATGCGTAGATAT	Xu	Oscillospira	80% Study
6c8898ad709fa5d93432d8a3a4dc3399	CGTGTAGGCGGGACTGCAAGTCAGATGTGAAAACTATGGGCTCAACCCATAGCCTGCATTTGAAACTGTAGTTCTTGAGTGCTGGAGAGGCAATCGGAATTCCGTGTGTAGCGGTGAAATGCATAGATAT	Xu	Oscillospira	80% Study
ec67810c0be5725982de53b242ec714a	CGTGTAGGCGGGACTGCAAGTCAGGCGTGAAAACTGGGGGCTCAACCTCCAGCCTGCGTTTGAAACTGTAGTTCTTGAGTACTGGAGAGGCAGACGGAATTCCTAGTGTAGCGGTGAAATGCGTAGATAT	Xu	Oscillospira	80% Study
98c1c52e3718bc2034559d26eb83198f	CGTGCAGCCGGGTCTGCAAGTCAGATGTGAAATCCGTGGGCTCAACCCGCGAACTGCATTTGAAACTGTGGATCTTGAGTACCGGAGAGGTTATCGGAATTCCTTGTGTAGCGGTGAAATGCGTAGATAT	Xu	Oscillospira	80% Study
3964bada824570e0f649394c94df000e	CGTGTAGGCGGGACTGCAAGTCAGGCGTGAAAACCATGGGCTCAACCCATGGCCTGCGTTTGAAACTGTAGTTCTTGAGTGCTGGAGAGGCGATCGGAATTCCGTGTGTAGCGGTGAAATGCGTAGATAT	Xu	Oscillospira	80% Study
d104c902217ae6a349a88d35deb26fc3	CGTGCAGCCGGGCTGGTAAGTCAGATGTGAAATCTGGAGGCTCAACCTCCAAACTGCATTTGAAACTGCTGGTCTTGAGTACCGGAGAGGTTATCGGAATTCCTTGTGTAGCGGTGAAATGCGTAGATAT	Xu	Oscillospira	80% Study
2791591d3020020057bdf2eb18ecc9e1	CGTGTAGGCGGGATTGCAAGTCAGATGTGAAAACCACGGGCTCAACCTGTGGCCTGCATTTGAAACTGTAGTTCTTGAGTGATGGAGAGGCAGGCGGAATTCCGTGTGTAGCGGTGAAATGCGTAGATAT	Xu	Oscillospira	80% Study
944d79c7a553212cde6611f3d4e77f04	CGTGTAGGCGGGACTGCAAGTCAGGTGTGAAAACTATGGGCTCAACCCATAGCCTGCACTTGAAACTGTAGTTCTTGAGTGCTGGAGAGGCAATCGGAATTCCGTGTGTAGCGGTGAAATGCGTAGATAT	Xu	Oscillospira	80% Study
a12b99d49c66775870d8606782b01ae6	CGTGCAGCCGGGAGTGCAAGTCAGATGTGAAATGCCGAGGCTCAACCTCGGAGCTGCATTTGAAACTGTACTTCTTGAGTACTGGAGAGGCAGACGGAATTCCTAGTGTAGCGGTGAAATGCGTAGATAT	Xu	Oscillospira	80% Study
8d757ce4b5faefd5da9d3f5f45f534bd	CGTGTAGGCGGGACCGCAAGTCAGATGTGAAAACTATGGGCTCAACCCATAGCCTGCATTTGAAACTGTGGTTCTTGAGTGCTGGAGAGGCAATCGGAATTCCGTGTGTAGCGGTGAAATGCGTAGATAT	Xu	Oscillospira	80% Study
bd8e194f3bfe4a1aac48ffd59c9cf2f4	CGTGTAGGCGGGATGGTAAGTCAGATGTGAAAACTATGGGCTCAACTCATAGCCTGCATTTGAAACTGCTGTTCTTGAGTACTGGAGAGGCAGACGGAATTCCTAGTGTAGCGGTGAAATGCGTAGATAT	Xu	Oscillospira	80% Study
084329c77c9b52435463191d3c6ba333	CGTGTAGGCGGGGCTGCAAGTCAGATGTGAAAACCAGGGGCTCAACCTCTGGCCTGCATTTGAAACTGTAGCTCTTGAGTGTCGGAGAGGCAATCGGAATTCCGTGTGTAGCGGTGAAATGCGTAGATAT	Xu	Oscillospira	80% Study
97e71966122d33f409d6ba194ad1bb51	CGTGTAGGCGGGATTGCAAGTCAGACGTGAAAACTATGGGCTCAACCCATAGCCTGCGTTTGAAACTGTAGTTCTTGAGTGCTGGAGAGGCAATCGGAATTCCGTGTGTAGCGGTGAAATGCGTAGATAT	Xu	Oscillospira	80% Study
70a1b2a63bf0f3dc3b7dfc2abfaf37b6	CGTGTAGGCGGGATGGCAAGTCAGATGTGAAAACTATGGGCTCAACCCATAGCCTGCATTTGAAACTGTCGTTCTTGAGTGCTGGAGAGGCAATCGGAATTCCGTGTGTAGCGGTGAAATGCGTAGATAT	Xu	Oscillospira	80% Study
59bf52bbaa56cc83d486d7c3fdead54d	CGTGTAGGCGGGACTGCAAGTCAGATGTGAAAACTATGGGCTCAACCCATAGCCTGCATTTGAAACTGTAGTTCTTGAGTGCTGGAGAGGCAATCGGAATTCCGTGTGTAGCGGTGAAATGCGTAGATAT	Xu	Oscillospira	80% Study
eb1eed7f8aed7197e596047c9b81d16d	CGTGTAGGCGGGACTGCAAGTCAGGCGTGAAAACCACGGGCTCAACCTGTGGCCTGCGTTTGAAACTGTAGTTCTTGAGTGATGGAGAGGCAGGCGGAATTCCGTGTGTAGCGGTGAAATGCGTAGATAT	Xu	Oscillospira	80% Study
24bffafcf8c1c102833949dc66c2ee9b	CGTGTAGGCGGGACTGCAAGTCAGGCGTGAAAACCATGGGCTCAACCCATGGCCTGCGTTTGAAACTGTAGTTCTTGAGTACTGGAGAGGCAGACGGAATTCCTAGTGTAGCGGTGAAATGCATAGATAT	Xu	Oscillospira	80% Study
a9f239daa883087e1ddc481de2ad2c34	CGTGTAGGCGGGCTTGCAAGTCAGATGTGAAAACTATGGGCTCAACCCATAGCCTGCATTTGAAACTGTAGGTCTTGAGTGCTGGAGAGGCAATCGGAATTCCGTGTGTAGCGGTGAAATGCGTAGATAT	Xu	Oscillospira	80% Study
dd71596b06d419e6d3e7ca730a7a8dff	CGTGTAGGCGGGGAGGCAAGTCAGATGTGAAAACCACGGGCTCAACCTGTGGCCTGCATTTGAAACTGTTTTTCTTGAGTGCTGGAGAGGCAATCGGAATTCCGTGTGTAGCGGTGAAATGCGTAGATAT	Xu	Oscillospira	80% Study
7a6fce63e7292865d7d4c74b2c6fe11b	CGTGTAGGCGGGGAAGCAAGTCAGATGTGAAAACCACGGGCTCAACCTGTGGCCTGCATTTGAAACTGTTTTTCTTGAGTGCTGGAGAGGCAATCGGAATTCCGTGTGTAGCGGTGAAATGCGTAGATAT	Xu	Oscillospira	80% Study
d2a6cd7c31445613acaa230a7f2a031d	CGTGTAGGCGGGAATGTAAGTCAGATGTGAAAACTATGGGCTCAACCCATAGCCTGCATTTGAAACTGCATTTCTTGAGTACTGGAGAGGCAGACGGAATTCCTAGTGTAGCGGTGAAATGCGTAGATAT	Xu	Oscillospira	80% Study
355a704ba52f4620df346c96b323fbc7	CGTGTAGGCGGGACTGCAAGTCAGATGTGAAAACTGGAGGCTCAACCTCCAGCCTGCATTTGAAACTGTAGTTCTTGAGTGCTGGAGAGGCAATCGGAATTCCGTGTGTAGCGGTGAAATGCATAGATAT	Xu	Oscillospira	80% Study
5353eede82726be43ab5f84a6f44d73b	CGTGCAGCCGGGATTACAAGTCAGATGTGAAATGCAGGGGCTCAACCCCTGAGCTGCATTTGAAACTGTAGTTCTTGAGTACTGGAGAGGCAGACGGAATTCCTAGTGTAGCGGTGAAATGCGTAGATAT	Xu	Oscillospira	80% Study
889bf5ac80accc8c56d298d2e0d883b5	CGTGCAGCCGGGAGTACAAGTCAGATGTGAAATGCCGAGGCTCAACCTCGGAGCTGCATTTGAAACTGTATTTCTTGAGTACTGGAGAGGCAGACGGAATTCCTAGTGTAGCGGTGAAATGCGTAGATAT	Xu	Oscillospira	80% Study
a3b5feb92cc7f5af62f8fa18c0b59576	CGTGCAGCCGGGATTACAAGTCAGATGTGAAATGCCGAGGCTCAACCTCGGAGCTGCATTTGAAACTGTAGTTCTTGAGTACTGGAGAGGCAGACGGAATTCCTAGTGTAGCGGTGAAATGCGTAGATAT	Xu	Oscillospira	80% Study
dbe05ff6f716ddeee8286d7527e39749	CGTGTAGCCGGGAGTGCAAGTCAGATGTGAAATACCGAGGCTCAACCTCGGGGCTGCATTTGAAACTGTACTTCTTGAGTACTGGAGAGGCAGACGGAATTCCTAGTGTAGCGGTGAAATGCGTAGATAT	Xu	Oscillospira	80% Study
35727e80476f635a5d9a4e079cace765	CGTGTAGGCGGGACTGCAAGTCAGATGTGAAAACCAGGGGCTCAACCTCTGGCCTGCATTTGAAACTGTAGTTCTTGAGTGCTGGAGAGGCAATCGGAATTCCGTGTGTAGCGGTGAAATGCGTAGATAT	Xu	Oscillospira	80% Study
d14a35f96337822457720433e1b171fb	CGTGCAGCCGGGAGAGCAAGTCAGATGTGAAATCCGTGGGCTTAACCCACGAACTGCATTTGAAACTGTTTTTCTTGAGTACTGGAGAGGCAGACGGAATTCCTAGTGTAGCGGTGAAATGCGTAGATAT	Xu	Oscillospira	80% Study
17cab9939aa9cd62132fd8fdcd8e9dde	CGTGTAGCCGGGGAGACAAGTCAGATGTGAAATCTGGAGGCTCAACCTCCAAACTGCATTTGAAACTGTCTTTCTTGAGTATCGGAGAGGTAATCGGAATTCCTTGTGTAGCGGTGAAATGCGTAGATAT	Xu	Oscillospira	80% Study
abe398ea289ba8d20a25dc06978f51dd	CGTGTAGCCGGGTGTGTAAGTCAGATGTGAAATCTGGAGGCTCAACCTCCAAACTGCATTTGAAACTGCGCATCTTGAGTATCGGAGAGGTCATCGGAATTCCTTGTGTAGCGGTGAAATGCGTAGATAT	Xu	Oscillospira	80% Study
02e04ebe9aea5956f001e9187e8689ce	CGTGTAGGCGGGACTGCAAGTCAGATGTGAAAACCATGGGCTCAACTCATGGCCTGCATTTGAAACTGTAGTTCTTGAGTGCTGGAGAGGCAATCGGAATTCCGTGTGTAGCGGTGAAATGCGTAGATAT	Xu	Oscillospira	80% Study
5b79e825a9d7f1038894fcf98e31c545	CGTGTAGGCGGGGAAGCAAGTCAGATGTGAAAACCACGGGCTCAACCTGTGGCCTGCATTTGAAACTGTTACTCTTGAGTGCTGGAGAGGCAATCGGAATTCCGTGTGTAGCGGTGAAATGCGTAGATAT	Xu	Oscillospira	80% Study
c2acfdc87663e92a7e1876285e7687f3	CGTGTAGGCGGGATGGCAAGTCAGATGTGAAAACCACGGGCTCAACCTGTGGCCTGCATTTGAAACTGTCGTTCTTGAGTACTGGAGAGGCAGACGGAATTCCTAGTGTAGCGGTGAAATGCGTAGATAT	Xu	Oscillospira	80% Study
cdda8fa24010ea9ccbfc227abfe96f79	CGTGTAGCCGGGAAGGCAAGTCAGATGTGAAATCTAGGGGCTCAACCCCTAAACTGCATTTGAAACTGTTTTTCTTGAGTACTGGAGAGGCAGACGGAATTCCTAGTGTAGCGGTGAAATGCGTAGATAT	Xu	Oscillospira	80% Study
79c053f6ddbea518c6f2422e457e17fa	CGTGTAGCCGGGCTGACAAGTCAGATGTGAAATCTGGAGGCTCAACCTCCAAACTGCATTTGAAACTGCCAGTCTTGAGTATCGGAGAGGTAATCGGAATTCCTTGTGTAGCGGTGAAATGCGTAGATAT	Xu	Oscillospira	80% Study
78dc2be4d19e53261fcf3bdc686cb000	CGTGTAGGCGGGATTGTAAGTCAGATGTGAAAACCAGGGGCTCAACCTCTGGCCTGCATTTGAAACTGCAGTTCTTGAGTACTGGAGAGGCAGACGGAATTCCTAGTGTAGCGGTGAAATGCGTAGATAT	Xu	Oscillospira	80% Study
b934a467f45063da845afcdcad0f4d21	CGTGTAGGCGGGATTGCAAGTCAGATGTGAAAACCACGGGCTCAACCTGTGGCCTGCATTTGAAACTGTAGTTCTTGAGTGCTGGAGAGGCAATCGGAATTCCGTGTGTAGCGGTGAAATGCGTAGATAT	Xu	Oscillospira	80% Study
cba6f7f89ce2c421947f4666b1c0b5d1	CGTGTAGCCGGGAGTACAAGTCAGATGTGAAATGCCGAGGCTCAACCTCGGAGCTGCATTTGAAACTGTATTTCTTGAGTACTGGAGAGGCAGACGGAATTCCTAGTGTAGCGGTGAAATGCGTAGATAT	Xu	Oscillospira	80% Study
64d1b0b2896a91c436251aacbae850b0	CGTGTAGGCGGGACTGCAAGTCAGATGTGAAAACTATGGGCTCAACCCATAGCCTGCATTTGAAACTGTAGTTCTTGAGTACTGGAGAGGCAGACGGAATTCCTAGTGTAGCGGTGAAATGCGTAGATAT	Xu	Oscillospira	80% Study
61c00ff44e91809d03eb0c44c238d3cc	CGCGTAGGCGGGACGACAAGTCAGATGTGAAAACTATGGGCTTAACCCATAGCCTGCATTTGAAACTGCCGTTCTTGAGTACTGGAGAGGCAATCGGAATTCCGTGTGTAGCGGTGAAATGCGTAGATAT	Xu	Oscillospira	80% Study
16d0d1f5ec634f67ca631e5292782614	CGTGTAGGCGGGAAGGCAAGTCAGATGTGAAAACTATGGGCTCAACCCATAGCCTGCATTTGAAACTGTTTTTCTTGAGTGATGGAGAGGCAGGCGGAATTCCGTGTGTAGCGGTGAAATGCGTAGATAT	Xu	Oscillospira	80% Study
844f15c9cc54ff4244d84490a6ce486f	CGTGTAGGCGGGATTGCAAGTCAGGCGTGAAAACTATGGGCTCAACCCATAGCCTGCGTTTGAAACTGTAGTTCTTGAGTGCTGGAGAGGCAATCGGAATTCCGTGTGTAGCGGTGAAATGCGTAGATAT	Xu	Oscillospira	80% Study
1fbfaa4c424c18e5406c89aa44c7bdfa	CGTGTAGGCGGGACTGCAAGTCAGATGTGAAACCCACGGGCTCAACCTGTGGCCTGCATTTGAAACTGTAGTTCTTGAGTGCTGGAGAGGCAATCGGAATTCCGTGTGTAGCGGTGAAATGCGTAGATAT	Xu	Oscillospira	80% Study
9016aee4aa7426c3f9309c65b66d07ad	CGTGTAGGCGGGACTGCAAGTCAGGCGTGAAAACCATGGGCTCAACCCATGGCCTGCGTTTGAAACTGTAGTTCTTGAGTGCTGGAGAGGCAATCGGAATTCCGTGTGTAGCGGTGAAATGCGTAGATAT	Xu	Oscillospira	80% Study
8711adf66fb421ff6d902777bb1ae92f	CGTGTAGGCGGGATTGCAAGTCAGATGTGAAAACCATGGGCTCAACTCATGGCCTGCATTTGAAACTGTAGTTCTTGAGTGTCGGAGAGGCAATCGGAATTCCGTGTGTAGCGGTGAAATGCGTAGATAT	Xu	Oscillospira	80% Study
11b94f2294f7566f00a3de4076688a49	CGTGCAGCCGGGAAGACAAGTCAGATGTGAAATGCCGAGGCTCAACCTCGGAGCTGCATTTGAAACTGTTTTTCTTGAGTACTGGAGAGGCAGACGGAATTCCTAGTGTAGCGGTGAAATGCGTAGATAT	Xu	Oscillospira	80% Study
c7f69908c89c242e342808a368974812	CGTGTAGGCGGGATTGCAAGTCAGATGTGAAAACTATGGGCTCAACCCATAGCCTGCATTTGAAACTGTAGTTCTTGAGTGCTGGAGAGGCAATCGGAATTCCGTGTGTAGCGGTGAAATGCATAGATAT	Xu	Oscillospira	80% Study
49eba2b1f194671ce1e7abdc3f1f0327	CGTGTAGGCGGGATGGCAAGTCAGGCGTGAAAACCATGGGCTCAACCCATGGCCTGCGTTTGAAACTGTCGTTCTTGAGTGCTGGAGAGGCAATCGGAATTCCGTGTGTAGCGGTGAAATGCGTAGATAT	Xu	Oscillospira	80% Study
fdb879447526d3cbcbc19735ee78a7b5	CAATGGGCGCAAGCCTGACCCAGCAACGCCGCGTGAAGGAAGAAGGCCCTCGGGTTGTAAACTTCTTTTGTCAGGGACGAAGCAAGTGACGGTACCTGACGAATAAGCCACGGCTAACTACGTGCCAGCA	Xu	Oscillospira	80% Study
82da4148485d6eb448efa10e42ec1d47	CAATGGGCGCAAGCCTGACCCAGCAACGCCGCGTGAAGGAAGAAGGCTTTCGGGTTGTAAACTTCTTTTGTCAGGGAACAGTAGAAGAGGGTACCTGACGAATAAGCCACGGCTAACTACGTGCCAGCAG	Xu	Oscillospira	80% Study
d7ff55a70157b9e88fa3cb92636e1cf6	CAATGGGCGAAAGCCTGACCCAGCAACGCCGCGTGAAGGAAGAAGGCTTTCGGGTTGTAAACTTCTTTTATCAGGGACGAAGGATGTGACGGTACCTGATGAATAAGCCACGGCTAACTACGTGCCAGCA	Xu	Oscillospira	80% Study
e8848b3dc781ce19d2bd7bce9c4fdd7a	CAATGGGCGCAAGCCTGACCCAGCAACGCCGCGTGAAGGAAGAAGGCTTTCGGGTTGTAAACTTCTTTTGTCAGGGACGAACAAATGACGGTACCTGACGAATAAGCCACGGCTAACTACGTGCCAGCAG	Xu	Oscillospira	80% Study
968dfccd3413010d45f277037c37f70f	CAATGGGCGCAAGCCTGACCCAGCAACGCCGCGTGAAGGAAGAAGGCTTTCGGGTTGTAAACTTCTTTTGTCAGGGAACAGTAGAAGAGGGTACCTGACGAATAAGCTCCGGCTAACTACGTGCCAGCAG	Xu	Oscillospira	80% Study
f1dc1342e68dbf404ee037deacbe7b93	CAATGGGCGCAAGCCTGACCCAGCAACGCCGCGTGAAGGAAGAAGGCTTTCGGGTTGTAAACTTCTTTTGTCAGGGAAGAGGAGAAGACTGTACCTGACGAATAAGCTCCGGCTAACTACGTGCCAGCAG	Xu	Oscillospira	80% Study
fa1815ef7d6a72eb8e6a6060b3960f31	CAATGGGCGCAAGCCTGACCCAGCAACGCCGCGTGAAGGAAGAAGGCTTTCGGGTTGTAAACTTCTTTTATTCGGGACGATAGTGACGGTACCGAATGAATAAGCCACGGCTAACTACGTGCCAGCAGCC	Xu	Oscillospira	80% Study
078e7befe5ed38e1d46644bb93805858	CAATGGGCGAAAGCCTGACCCAGCAACGCCGCGTGAAGGAAGAAGGCTTTCGGGTTGTAAACTTCTTTTATCAGGGACGAAGTAGTGACGGTACCTGATGAATAAGCTCCGGCTAACTACGTGCCAGCAG	Xu	Oscillospira	80% Study
50c6ad36b44679ed3432f29cae3aeaf9	CAATGGGCGCAAGCCTGACCCAGCAACGCCGCGTGAAGGAAGAAGGCTTTCGGGTTGTAAACTTCTTTTCTTAGGGACGAAGGAAGTGACGGTACCTAAGGAATAAGCTCCGGCTAACTACGTGCCAGCA	Xu	Oscillospira	80% Study
883c45fb8e42f84d665cbfe49b27972c	CAATGGGCGCAAGCCTGACCCAGCAACGCCGCGTGAAGGAAGAAGGCTTTCGGGTTGTAAACTTCTTTTCTTGGGGACGAAACAAATGACGGTACCTAAGGAATAAGCTCCGGCTAACTACGTGCCAGCA	Xu	Oscillospira	80% Study
833c369f9867ad1ae128212a3f5d3439	CAATGGGCGCAAGCCTGACCCAGCAACGCCGCGTGAAGGAAGAAGGCTTTCGGGTTGTAAACTTCTTTTGTCAGGGAAGATGAAAGAGACTGTACCTGACGAATAAGCCACGGCTAACTACGTGCCAGCA	Xu	Oscillospira	80% Study
a2de5a82fbe20bd5a562892b3260b387	CAATGGACGCAAGTCTGACCCAGCAACGCCGCGTGAAGGAAGAAGGCTTTCGGGTTGTAAACTTCTTTTGTCAGGGAACAGTAGAAGAGGGTACCTGACGAATAAGCCACGGCTAACTACGTGCCAGCAG	Xu	Oscillospira	80% Study
1039e01fbbd09d024e085c66093311ef	CAATGGGCGCAAGCCTGACCCAGCAACGCCGCGTGAAGGAAGAAGGCTTTCGGGTTGTAAACTTCTTTTATTCGGGACGAAGCAAGTGACGGTACCGAATGAATAAGCCACGGCTAACTACGTGCCAGCA	Xu	Oscillospira	80% Study
6013f2d680276a29488635d7857b5d11	CAATGGGCGCAAGCCTGACCCAGCAACGCCGCGTGAAGGAAGAAGGCTTTCGGGTTGTAAACTTCTTTTGTCAGGGAAGATGAACGAGACTGTACCTGACGAATAAGCCACGGCTAACTACGTGCCAGCA	Xu	Oscillospira	80% Study
7fd7adaf4a00a2ab87e1c68c0dfa7dd7	CGTGTAGGCGGGATTGCAAGTCAGATGTGAAAACTGGAGGCTCAACCTTCAGCCTGCATTTGAAACTGTAGTTCTTGAGTGTCGGAGAGGCAATCGGAATTCCGTGTGTAGCGGTGAAATGCGTAGATAT	Xu	Oscillospira	80% Study
9904b9b10a4f2fbfa959807987f9dcf4	CGTGCAGCCGGGAGTACAAGTCAGATGTGAAATGCCGAGGCTCAACCTCGGAGCTGCATTTGAAACTGTACTTCTTGAGTACTGGAGAGGCAGACGGAATTCCTAGTGTAGCGGTGAAATGCGTAGATAT	Xu	Oscillospira	80% Study
3cddb32562b9fa52e68d17acba364c7f	CACGTAGGCTGTCGTGTAAGTCAGGGGTGAAAGCCCACGGCTCAACCGTGGAATTGCCCTTGATACTGCATGACTGGAATCCGGGAGAGGGTGGCGGAATTCCAGGTGTAGGAGTGAAATCCGTAGATAT	Xu	Desulfovibrio	80% Study
bc56006027e0495f5d0aff730f35fdc8	CACGTAGGCTGTTATGTAAGTCAGGGGTGAAAGCCCACGGCTCAACCGTGGAACTGCCCTTGATACTGCACGACTTGAATCCGGGAGAGGGTGGCGGAATTCCAGGTGTAGGAGTGAAATCCGTAGATAT	Xu	Desulfovibrio	80% Study
c44cbf71cbd5a6546b41f4858733843d	CACGTAGGCTGTTGCGTAAGTCAGGGGTGAAATCCCACGGCTCAACCGTGGAACTGCCCTTGATACTGCGTGACTGGAATCCGGGAGAGGGTGGCGGAATTCCTGGTGTAGGAGTGAAATCCGTAGATAT	Xu	Desulfovibrio	80% Study
8f7c4966e7d8bd3ed94f03f5c81f0d25	CACGTAGGCTGTTATGTAAGTCAGGGGTGAAATCCCACGGCTCAACCGTGGAACTGCCCTTGATACTGCACGACTTGAATCCGGGAGAGGGTGGCGGAATTCCAGGTGTAGGAGTGAAATCCGTAGATAT	Xu	Desulfovibrio	80% Study
70457be5ebe4b952bbd4ad8a3a198f5f	CGTGTAGGCTGTATGGCAAGTTGGGGGTGAAATCCCACGGCTCAACCGTGGAACTGCCTTCAAAACTACCAAACTGGAGTGCGAGAGAGGATAGCGGAATTCCAGGTGTAGGAGTGAAATCCGTAGATAT	Xu	Desulfovibrio	80% Study
7b92e97157add2b80eb81c241ec416e8	CACGTAGGCTGTTATGTAAGTCAGGGGTGAAAGCCCACGGCTCAACCGTGGAACTGCCCTTGATACTGCACGACTCGAATCCGGGAGAGGGTGGCGGAATTCCAGGTGTAGGAGTGAAATCCGTAGATAT	Xu	Desulfovibrio	80% Study
55fa7f46b2556792672a1efd45b1eca3	CGTGTAGGCTGTATGGCAAGTTGGAGGTGAAATCCCACGGCTCAACCGTGGAACTGCCTTCAAAACTACCAAACTGGAGTGCGAGAGAGGATAGCGGAATTCCAGGTGTAGGAGTGAAATCCGTAGATAT	Xu	Desulfovibrio	80% Study
046b255b4341252f3dee405e3d0d8201	CACGTAGGCTGTTATGTAAGTCAGGGGTGAAATCCCACGGCTCAACCGTGGAACTGCCCTTGATACTGCACGACTCGAATCCGGGAGAGGGTGGCGGAATTCCAGGTGTAGGAGTGAAATCCGTAGATAT	Xu	Desulfovibrio	80% Study
c74198ecbefcbbd653dbd2667c4273fa	CGTGTAGGCTGTATGGCAAGTTGGGGGTGAAATCCCACGGCTCAACCGTGGAACTGCCTTCAAAACTACCAAACTAGAGTGCGAGAGAGGATAGCGGAATTCCAGGTGTAGGAGTGAAATCCGTAGATAT	Xu	Desulfovibrio	80% Study
3dfa3e058548d339c3a15a1d984f62af	CATGTAGGCTGTACGGCAAGTTGGAGGTGAAATCCCACGGCTCAACCGTGGAACTGCCTTCAAAACTACCGAACTAGAGTGCGAGAGAGGATAGCGGAATTCCAGGTGTAGGAGTGAAATCCGTAGATAT	Xu	Desulfovibrio	80% Study
524d70cce4525d6268f30120d8768c46	CACGTAGGCTGTTTGTCAAGTCAGGGGTGAAATCCCGCGGCTCAACCGCGGAATTGCCTTTGAAACTGGCGGACTGGAGTGTCGGAGAGGGTGGCGGAATTCCAGGTGTAGGAGTGAAATCCGTAGATAT	Xu	Desulfovibrio	80% Study
a6d44e1e3ab40dd8c5553e72aecd60a5	CATGTAGGCTGTATGGCAAGTTGGAGGTGAAATCCCACGGCTCAACCGTGGAACTGCCTTCAAAACTACCAAACTGGAGTGCGAGAGAGGATAGCGGAATTCCAGGTGTAGGAGTGAAATCCGTAGATAT	Xu	Desulfovibrio	80% Study
d54d9b9cfa9bbdccd3563ff5d44cd157	CATGTAGGCTGTATGGCAAGTTGGGGGTGAAATCCCACGGCTCAACCGTGGAACTGCCTTCAAAACTACCAAACTGGAGTGCGAGAGAGGATAGCGGAATTCCAGGTGTAGGAGTGAAATCCGTAGATAT	Xu	Desulfovibrio	80% Study
c5232967650b2c1d97905af1b6111f99	CACGTAGGCTGTTGCGTAAGTCAGGGGTGAAATCCCACGGCTCAACCGTGGAACTGCCCTTGATACTGCGTGACTAGAATCCGGGAGAGGGTGGCGGAATTCCTGGTGTAGGAGTGAAATCCGTAGATAT	Xu	Desulfovibrio	80% Study
2c7dbfdc9cc77cca568ec2ceb8a4f501	CACGTAGGTGGTTTGTTAAGTCAGGGGTGAAATCCCACAGCCCAACTGTGGAACTGCCCTTGATACTGGCAGACTTGAGTACCGGAGAGGGTGGCGGAATTCCAGGTGTAGGAGTGAAATCCGTAGATAT	Xu	Desulfovibrio	80% Study
57364cb8c044a5d008a6eb86c2b9b5f7	CGTGTAGGCTGTATGGCAAGTTGGAGGTGAAATCCCACGGCTCAACCGTGGAACTGCCTTCAAAACTACCAAACTAGAGTGCGAGAGAGGATAGCGGAATTCCAGGTGTAGGAGTGAAATCCGTAGATAT	Xu	Desulfovibrio	80% Study
7349b6931bce800a2bffee5cf5f9f4c6	CACGTAGGCTGTATGTCAAGTCAAGGGTGAAATCCCACGGCTCAACCGTGGAACTGCCTTTGAAACTGGCAAACTGGAGTATGTGAGAGGGTGGCGGAATTCCTGGTGTAGGAGTGAAATCCGTAGATAT	Xu	Desulfovibrio	80% Study
513670d201ecdbf339de49edf4c5bdb1	CACGTAGGCTGTTTGTCAAGTCAGGGGTGAAATCCCGCGGCTCAACCGCGGAACTGCCCTTGAAACTGGTAGACTTGAGTGCCGGAGAGGGTGGCGGAATTCCAGGTGTAGGAGTGAAATCCGTAGATAT	Xu	Desulfovibrio	80% Study
bf592749aea449ac0574bfe23cc1ee0d	CACGTAGGCTGTTTGTCAAGTCAGGGGTGAAATCCCGCGGCTCAACCGCGGAATTGCCTTTGAAACTGGCGAACTGGAGTGTCGGAGAGGGTGGCGGAATTCCAGGTGTAGGAGTGAAATCCGTAGATAT	Xu	Desulfovibrio	80% Study
5e5b46d36e2fa8a7ee9adf572770dec3	CATGTAGGCTGTACGGCAAGTTGGAGGTGAAATCCCACGGCTCAACCGTGGAACTGCCTTCAAAACTACCGAACTGGAGTGCGAGAGAGGATAGCGGAATTCCAGGTGTAGGAGTGAAATCCGTAGATAT	Xu	Desulfovibrio	80% Study
cf8e319e4ecdce046a0b465188811a0a	CGCGTAGGTGGTTATATAAGTCAGGGGTGAAAGCCCACCGCTTAACGGTGGAACAGCCTTTGATACTGTATAACTTGAGTATCGGAGAGGGTGGCGGAATTCCAGGTGTAGGGGTGAAATCCGTAGATAT	Xu	Desulfovibrio	80% Study
3c6efd5e14795ae41229add8b807a036	CACGTAGGCGGTTTGTTAAGTCAGGGGTGAAATCCCACAGCCCAACTGTGGAACTGCCCTTGATACTGGCAGACTTGAGTACCGGAGAGGGTGGCGGAATTCCAGGTGTAGGAGTGAAATCCGTAGATAT	Xu	Desulfovibrio	80% Study
b856e052e851e2e7b1be4b5812f56648	CACGTAGGCTGTCATGTAAGTCAGGGGTGAAAGCCCACGGCTCAACCGTGGAACTGCCCTTGATACTGCACGACTTGAATCCGGGAGAGGGTGGCGGAATTCCAGGTGTAGGAGTGAAATCCGTAGATAT	Xu	Desulfovibrio	80% Study
8b9215e3e0e6e20c7e8f5c0fa4c9dddc	CACGTAGGCTGTTATGTAAGTCAGGGGTGAAATCCCACGGCTCAACCGTGGAACTGCCTTTGATACTGCACGACTTGAATCCGGGAGAGGGTGGCGGAATTCCAGGTGTAGGAGTGAAATCCGTAGATAT	Xu	Desulfovibrio	80% Study
577e24527450a1f01e84ea3d09f6cf6f	CACGTAGGCTGTTGCGTAAGTCAGGGGTGAAAGCCCACGGCTCAACCGTGGAACTGCCCTTGATACTGCGTGACTGGAATCCGGGAGAGGGTGGCGGAATTCCTGGTGTAGGAGTGAAATCCGTAGATAT	Xu	Desulfovibrio	80% Study
47313d3e01db6a95726ae5f3b551891b	CAATGGGCGAAAGCCTGACGCAGCGACGCCGCGTGAGGGATGAAGGTCTTCGGATCGTAAACCTCTGTCAGAAGGGAAGAACGTACTGTGTGCTAATCAGCGCAGTAGTGACGGTACCTTCAAAGGAAGC	Xu	Desulfovibrio	80% Study
db2746d1c000f7314a8f7b92c3cbfd99	CAATGGGCGAAAGCCTGACGCAGCAACGCCGCGTGAGGGATGAAGGTCTTCGGATCGTAAACCTCTGTCGGGAGGGAAAAACGTGCAGTGTGCTAATCAGCATTGCAGTGATGGTACCTCCAAAGGAAGC	Xu	Desulfovibrio	80% Study
149e2916eca88b74713e7fb41d2a25fb	CAATGGGCGAAAGCCTGACGCAGCGACGCCGCGTGAGGGATGAAGGTCTTCGGATCGTAAACCTCTGTCAGAAGGGAAGAAACTAGGGTGCTCTAATCATCATCCTACTGACGGTACCTTCAAAGGAAGC	Xu	Desulfovibrio	80% Study
3fe8197e9313d3c91fa087d2a7268114	CACGTAGGCTGTTATGTAAGTCAGGGGTGAAAGCCCACGGCTCAACCGTGGAACTGCCCTTGATACTGCACGACTCGAATCCGGGAGAGGATGGCGGAATTCCAGGTGTAGGAGTGAAATCCGTAGATAT	Xu	Desulfovibrio	80% Study
01e77e9bcb85147e54f670646923e549	TGCGCAGGCGGTTGGGTAAGACAGGTGTGAAATCCCCGAGCTTAACTTGGGAACTGCACTTGTGACTGCTCAACTAGAGTATGTCAGAGGGAGGTGGAATTCCAAGTGTAGCAGTGAAATGCGTAGATAT	Xu	Sutterella	80% Study
7acec43022e5ac560087e6de12e4029b	TGCGCAGGCGGTTGGGTAAGACAGATGTGAAATCCCCGGGCTTAACCTGGGAACTGCATTTGTGACTGTCCGACTGGAGTATGTCAGAGGGGGGTGGAATTCCAAGTGTAGCAGTGAAATGCGTAGATAT	Xu	Sutterella	80% Study
ded1cf514e5b324c4537209d388a86a7	TGCGCAGGCGGCTTTGTAAGACAGATGTGAAATCCCTGAGCTTAACTTAGGAACTGCATTTGTGACTGCAAGGCTAGAGTATGTCAGAGGGAGGTGGAATTCCAAGTGTAGCAGTGAAATGCGTAGATAT	Xu	Sutterella	80% Study
237362c36de2830b2b8941e0b7324475	TGCGCAGGCGGTTTCGTAAGACAGATGTGAAATCCCCGGGCTTAACCTGGGAATTGCATTTGTGACTGCGGGACTAGAGTTTGGCAGAGGGAGGTGGAATTCCAAGTGTAGCAGTGAAATGCGTAGATAT	Xu	Sutterella	80% Study
ef3e3d866bb2ed01ca3728f158069982	TGCGCAGGCGGTTGGGTAAGACAGATGTGAAATCCCCGGGCTTAACCTGGGAACTGCATTTGTGACTGTCCGACTAGAGTATGTCAGAGGGGGGTGGAATTCCAAGTGTAGCAGTGAAATGCGTAGATAT	Xu	Sutterella	80% Study
e4e0e28f1b84e48ac4852db2d0267ac3	TGCGCAGGCGGTTGGGTAAGACAGATGTGAAATCCCCGAGCTTAACTTGGGAACTGCATTTGTGACTGCCTAACTAGAGTATGTCAGAGGGAGGTGGAATTCCAAGTGTAGCAGTGAAATGCGTAGATAT	Xu	Sutterella	80% Study
a59799caa3abcbafabdcf58cac6e2d34	TGCGCAGGCGGTTGGGTAAGACAGGTGTGAAATCCCCGAGCTTAACTTGGGAACAGCACTTGTGACTGCTCGACTAGAGTATGTCAGAGGGAGGTGGAATTCCAAGTGTAGCAGTGAAATGCGTAGATAT	Xu	Sutterella	80% Study
40b2a4649857470e082ea84b3ed0cd31	TGCGCAGGCGGTTGGGTAAGACAGGTGTGAAATCCCCGAGCTTAACTTGGGAACTGCACTTGTGACTGCCTAACTAGAGTATGTCAGAGGGAGGTGGAATTCCAAGTGTAGCAGTGAAATGCGTAGATAT	Xu	Sutterella	80% Study
25ed9d70df741f1f20171d71f24532c4	TGCGCAGGCGGTTGGGTAAGACAGGTGTGAAATCCCCGAGCTTAACTTGGGAACAGCACTTGTGACTGCCCGACTAGAGTATGTCAGAGGGAGGTGGAATTCCAAGTGTAGCAGTGAAATGCGTAGATAT	Xu	Sutterella	80% Study
5130f310ed5df7efce1d3d889da85b3e	TGCGCAGGCGGTTGGGTAAGACAGGTGTGAAATCCCCGAGCTTAACTTGGGAACAGCACTTGTGACTGCCCAACTAGAGTATGTCAGAGGGAGGTGGAATTCCAAGTGTAGCAGTGAAATGCGTAGATAT	Xu	Sutterella	80% Study
d25aa3404ea08755bcc0c0758ca3d0cf	TGCGCAGGCGGTTGGGTAAGACAGGTGTGAAATCCCCGAGCTTAACTTGGGAACTGCACTTGTGACTGCTTAACTAGAGTATGTCAGAGGGAGGTGGAATTCCAAGTGTAGCAGTGAAATGCGTAGATAT	Xu	Sutterella	80% Study
0b6360089c1cd33cca868b6c3b9f6c4e	TGCGCAGGCGGTTGGGTAAGACAGGTGTGAAATCCCCGAGCTTAACTTGGGAACAGCACTTGTGACTGCTTGACTAGAGTATGTCAGAGGGAGGTGGAATTCCAAGTGTAGCAGTGAAATGCGTAGATAT	Xu	Sutterella	80% Study
cc571ca1a25534f47149d9a4f0f4c5a2	TGCGCAGGCGGTTCCGTAAGATAGATGTGAAATCCCCGGGCTCAACCTGGGAATTGCATTTATGACTGCGGGACTGGAGTTTGTCAGAGGGGGGTGGAATTCCAAGTGTAGCAGTGAAATGCGTAGATAT	Xu	Sutterella	80% Study
826923fd5d6d64dcac75dc355fa85684	CAATGGGGGCAACCCTGATCCAGCCATGCCGCGTGCAGGATGAAGGCCTTCGGGTTGTAAACTGCTTTTGTCAGGGACGAAAAGGTTTCCGCTAATACCGGAGACTGCTGACGGTACCTGAAGAATAAGC	Xu	Sutterella	80% Study
f624e38f1208c0f60b4ea7f83bafb34a	CAATGGGGGCAACCCTGATCCAGCCATGCCGCGTGCAGGATGAAGGCCTTCGGGTTGTAAACTGCTTTTGTCAGGGACGAAAAGGTCTCCGCTAATACCGGAGACTGCTGACGGTACCTGAAGAATAAGC	Xu	Sutterella	80% Study
bd9fb0f0089da7b839cc00987aac6922	TGCGCAGGCGGTTTCGTAAGATAGATGTGAAATCCCCGGGCTCAACCTGGGAATTGCATTTATGACTGCGGGACTGGAGTTTGTCAGAGGGGGGTGGAATTCCAAGTGTAGCAGTGAAATGCGTAGATAT	Xu	Sutterella	80% Study
53e518feb278e5a4a7c86b7dc88394a5	CATGTAGGCGGCCTATTAAGTCGGGCGTGAAAATGCGGGGCTCAACCCCGTATGGCGCCCGATACTGGTGGGCTTGAGTGCAGGAGAGGAAAGGGGAATTCCCAGTGTAGCGGTGAAATGCGTAGATATT	Xu	Phascolarctobacterium	80% Study
5311e6b9731c3687f7370d83ffec2bb4	CATGTAGGCGGCCAATTAAGTCGGGCGTGAAAATGCGGGGCTCAACCCCGTATGGCGCCCGATACTGGTAGGCTTGAGTGCAGGAGAGGAAAGGGGAATTCCCAGTGTAGCGGTGAAATGCGTAGATATT	Xu	Phascolarctobacterium	80% Study
0f9ab67d171fe4e6305cd93bb1d34e6c	CACGTAGGCGGTGTTGTAAGTCATTAGTCAAAGGCTAGAGCTCAACTTTAGTAAGGCTAGTGATACTATAATACTAGAGTATCAGAGAGGATTGCAGAATTCCTGGTGTAGCGGTGAAATGCGTAGATAT	Xu	Mucispirillum	80% Study
8e91c1291054ff473f4cad77083f15dd	CACGTAGGCGGTGTTGTAAGTCATTAGTCAAAGGCTAGAGCTCAACTTTAGTAAGGCTAGTGATACTACAATACTAGAGTATCAGAGAGGATTGCAGAATTCCTGGTGTAGCGGTGAAATGCGTAGATAT	Xu	Mucispirillum	80% Study
d8c8aaf212bf34fe7a7a3903d3d3d224	CACGTAGGCGGTGTCGTAAGTCATTAGTCAAAGGCTAGAGCTCAACTTTAGTAAGGCTAGTGATACTATAATACTAGAGTATCAGAGAGGATTGCAGAATTCCTGGTGTAGCGGTGAAATGCGTAGATAT	Xu	Mucispirillum	80% Study
276b8d1ae50e8e360f047f9f3721b8dc	CAATGCTCGAGAGAGTGACGCAGCGACGCCGCGTGAATGACGAAGGCCTTCGGGTCGTAAAGTTCTTTCGACAGGGAAGAATGTGTATAGTAGTAACTGACTATACAGTGACGGTACCTGTATAAGCAGC	Xu	Mucispirillum	80% Study
fb2886523d5a6fc607ccffea23901bd9	CAATGCTCGTTAGAGTGACGCAGCGACGCCGCGTGAATGACGAAGGCCTTCGGGTCGTAAAGTTCTTTCGACAGGGAAGAAAATGCGTATGAGTAACTGCATACGTAGTGACGGTACCTGTATAAGCAGC	Xu	Mucispirillum	80% Study
e1cf262c3b0557d82a4f05cb7ceecf98	CAATGCTCGGTAGAGTGACGCAGCGACGCCGCGTGAATGACGAAGGCCTTCGGGTCGTAAAGTTCTTTCGACAGGGAAGAAAATGCGTATGAGTAACTGCGTACGTAGTGACGGTACCTGTATAAGCAGC	Xu	Mucispirillum	80% Study
c53e2719117cef6e67a9c86338a9862f	AGCGCAGGCGGGTATGCAAGTTGGGAGTGAAATACATGGGCTCAACCCATGAACTGCTCTCAAAACTGTGTATCTTGAGTAGTGCAGAGGTAGGCGGAATTCCCGGTGTAGCGGTGGAATGCGTAGATAT	Xu	Faecalibacterium	80% Study
f008dae80e6a37ba0a6ae25079bc268f	AGCGCAGGCGGGTAGACAAGTTGGGAGTGAAATGCATGGGCTCAACCCATGAACTGCTCTCAAAACTGTAGATCTTGAGTAGTGCAGAGGTAGGCGGAATTCCCGGTGTAGCGGTGGAATGCGTAGATAT	Xu	Faecalibacterium	80% Study
908571c17c5d13331fd0f375e3c536bc	AGCGCAGGCGGGTATGCAAGTTGGAAGTGAAATACATGGGCTCAACCCATGAACTGCTTTCAAAACTGTGTATCTTGAGTAGTGCAGAGGTAGGCGGAATTCCCGGTGTAGCGGTGGAATGCGTAGATAT	Xu	Faecalibacterium	80% Study
d0f24248d19f39848b2c7d98ab72b5dd	AGCGCAGGCGGGAATGCAAGTTGGGAGTGAAATCTACGGGCTCAACCCGTAAACTGCTCTCAAAACTGTATTTCTTGAGTAGTGCAGAGGTAGGCGGAATTCCCGGTGTAGCGGTGGAATGCGTAGATAT	Xu	Faecalibacterium	80% Study
abcf0ec1ec8ed2add1c78c3dfdd34824	AGCGCAGGCGGGTTTTCAAGTTGGGAGTGAAATACATGGGCTCAACCCATGAACTGCTCTCAAAACTGGAGATCTTGAGTAGTGCAGAGGTAGGCGGAATTCCCGGTGTAGCGGTGGAATGCGTAGAGAT	Xu	Faecalibacterium	80% Study
a9f69a28b83af3c5b55f2c1e561ad5da	AGCGCAGGCGGGTATGCAAGTTGGGAGTGAAATGCATGGGCTCAACCCATGAACTGCTCTCAAAACTGTGTATCTTGAGTAGTGCAGAGGTAGGCGGAATTCCCGGTGTAGCGGTGGAATGCGTAGATAT	Xu	Faecalibacterium	80% Study
0f50a10c76bb7bfedfb21f29ddf52573	AGCGCAGGCGGGTATGCAAGTTGGGAGTGAAATGCATAGGCTCAACCTATGAACTGCTCTCAAAACTGTGTATCTTGAGTAGTGCAGAGGTAGGCGGAATTCCCGGTGTAGCGGTGGAATGCGTAGATAT	Xu	Faecalibacterium	80% Study
33235b49eeb03973c195313f5c5b6506	AGCGCAGGCGGGTCTGCAAGTTGGAAGTGAAACTCATGGGCTCAACCCATGAACTGCTTTCAAAACTGCGGATCTTGAGTGGTGTAGAGGTAGGCGGAATTCCCGGTGTAGCGGTGGAATGCGTAGATAT	Xu	Faecalibacterium	80% Study
889cf1b86016fb321c038cdab35bd4b7	AGCGCAGGCGGGGCGGCAAGTTGGAAGTGAAATCTATGGGCTCAACCCATAAACTGCTTTCAAAACTGCTGGTCTTGAGTAGTGCAGAGGTAGGCGGAATTCCCGGTGTAGCGGTGGAATGCGTAGATAT	Xu	Faecalibacterium	80% Study
62afc88d573f39f258b80a0f64cebfc0	AGCGCAGGCGGGAAGACAAGTTGGGAGTGAAATCTATGGGCTCAACCCATAAACTGCTCTCAAAACTGTTTTTCTTGAGTAGTGCAGAGGTAGGCGGAATTCCCGGTGTAGCGGTGGAATGCGTAGATAT	Xu	Faecalibacterium	80% Study
111e9d3a64d9ef7e914ae7e9e44bd9bd	AGCGCAGGCGGGATGGCAAGTTGGAAGTGAAACCCATGGGCTTAACCCATGAACTGCTTTCAAAACTGCCGTTCTTGAGTGGTGCAGAGGTAGGCGGAATTCCCGGTGTAGCGGTGGAATGCGTAGATAT	Xu	Faecalibacterium	80% Study
9a412458a6dc5697a88c3cb511c15d74	CAATGGGGGAAACCCTGATGCAGCGACGCCGCGTGGAGGAAGAAGGTCTTCGGATTGTAAACTCCTGTTGTTGGGGAAAAGAAGGATGGTACCCAACAAGGAAGTGACGGCTAACTACGTGCCAGCAGCC	Xu	Faecalibacterium	80% Study
ac4bf7183c04f14dfe5ff5b33f9e199a	CAATGGGGGAAACCCTGATGCAGCGACGCCGCGTGGAGGAAGAAGGTCTTCGGATTGTAAACTCCTGTTGTTGAGGAAAAAGAGGATGGTACTCAACAAGGAAGTGACGGCTAACTACGTGCCAGCAGCC	Xu	Faecalibacterium	80% Study
4f363419a78a771969b7790a4691fc16	CAATGGGGGAAACCCTGATGCAGCGACGCCGCGTGGAGGAAGAAGGTCTTCGGATTGTAAACTCCTGTTGTTGGGGAAAAAGAGGATGGTACCCAACAAGGAAGTGACGGCTAACTACGTGCCAGCAGCC	Xu	Faecalibacterium	80% Study
506f6f03e784e6459096378f0b3ae1da	AGCGCAGGCGGGTCTGCAAGTTGGAAGTGAAACCCATGGGCTCAACCCATGAACTGCTTTCAAAACTGCGGATCTTGAGTGGTGTAGAGGTAGGCGGAATTCCCGGTGTAGCGGTGGAATGCGTAGATAT	Xu	Faecalibacterium	80% Study
e1d64c79a2c08ab3b04fc22acf0c035f	AGCGCAGGTGGGTATGCAAGTTGGGAGTGAAATACATGGGCTCAACCCATGAACTGCTCTCAAAACTGTGTATCTTGAGTAGTGCAGAGGTAGGCGGAATTCCCGGTGTAGCGGTGGAATGCGTAGATAT	Xu	Faecalibacterium	80% Study
90f93038ba416c8824d2b4ba3683b12c	CACGCAGGCGGGCTGATAAGTAAGGTGTGAAATACCGGGGCTCAACCTCGGGGCTGCATTTTAAACTGTCAGTCTAGAGTATTGCAGAGGGAGACGGAATTCCGGGTGTAGCGGTGAAATGCGTAGATAT	Xu	Succinatimonas	80% Study
0937e96f0e8db48c8fdc9d8e100eb645	CAATGGGGGGAACCCTGATGCAGCCATGCCGCGTGTGTGAAGAAGGCCTTCGGGTTGTAAAGCACTTTCAGCGGGGAGGAAATTAAGTTAGACGTTACCCGCAGAAGAAGCACCGGCTAACTCCGTGCCA	Xu	Succinatimonas	80% Study
2967e4ae8a109609448be077d1d9dd4c	CGCGTAGGCGGGGGATCAAGTCAGCGGTAAAAGCCTGCAGCTTAACTGTAGCACGCCGTTGAAACTGGTTCTCTAGAGTTCGGTCAAGGGAGGCGGAACAGGTGAAGTAGCGGTGAAATGCATAGATATC	Xu	Butyricimonas	80% Study
f1e769e0b2e938319a9aa23ee9db4e27	CGCGTAGGCGGGACGGCAAGTCAGCGGTAAAAGACTGCAGCTCAACTGTAGCACGCCGTTGAAACTGTCGACCTGGAGCCCGGTCGAGGGAGGCGGAACAGGGTAAGTAGCGGTGAAATGCATAGATATA	Xu	Butyricimonas	80% Study
a17f4048dea9825c8349754f92e5cf13	TACGTAGGCTGCACCATAAGTCGTGCGTGAAAGGCAGGGGCTCAACCTCTGGAGTGCGCGTGATACTGTGGTGCTGGAGTAATGGAGGGGGAACCGGAATTCTTGGTGTAGCAGTGAAATGCGTAGATAT	Xu	Akkermansia	80% Study
59ae3abe83a60f916b8d9eb8d9c75ba2	TACGTAGGCTGCGGCATAAGTCGTGCGTGAAAGGCAGGGGCTCAACCCCTGGAGTGCGCGTGATACTGTGCTGCTGGAGTAATGGAGGGGGAACCGGAATTCTTGGTGTAGCAGTGAAATGCGTAGATAT	Xu	Akkermansia	80% Study
6729187613d456a2f0391375aacb73de	TGCGTAGGCTGTTTCGTAAGTCGTGTGTGAAAGGCGCGGGCTCAACCCGCGGACGGCACATGATACTGCGAGACTAGAGTAATGGAGGGGGAACCGGAATTCTCGGTGTAGCAGTGAAATGCGTAGATAT	Xu	Akkermansia	80% Study
abb61a1ad078167c4bc78a0aedefa3d7	TACGTAGGCTGCACCATAAGTCGTGCGTGAAAGGCAGGGGCTCAACCTCTGGAGTGCGCATGATACTGTGGTGCTGGAGTAATGGAGGGGGAACCGGAATTCTTGGTGTAGCAGTGAAATGCGTAGATAT	Xu	Akkermansia	80% Study
f0134cc9b51374942c780a57908d05ed	AGCGTAGGCCGCGCGTCAAGCGTGCCGTGAAATGCCGTGGCTCAACCATGGCACCGCGGCGCGAACTGTCGCGCTTGAGTGGGCTCGAGGCAGGCGGAATTCGTGGTGTAGCGGTGAAATGCTTAGATAT	Xu	Prevotella	80% Study
9382bcd366967a7cd929de90271104e0	AGCGCAGGCCGCGCCTTAAGCGTGCCGTGAAAAGCAGTGGCTCAACCATTGCCGTGCGGCGCGAACTGGGGCGCTTGAGTGCGCCGGAGGGAGGCGGAATTCGTGGTGTAGCGGTGAAATGCTTAGATAT	Xu	Prevotella	80% Study
ddb782488a3b23d098712b98c7a0278f	AGCGTAGGCCGTCTCAAAAGCGTGTTGTGAAATGTCCGGGCTCAACCGGGGCCGTGCAGCGCGAACTGTGAGACTTGAGTGTGCGGAAGGTATGCGGAATTCGTGGTGTAGCGGTGAAATGCATAGATAT	Xu	Prevotella	80% Study
15b15e7d95909260bfcbc288ca754ca8	AGCGCAGGCCGCCTATTAAGCGTGCCGTGAAATGCCGCGGCTCAACCGTGGCACTGCGGCGCGAACTGGTGGGCTTGGGTGCGCGGAAGGCAGGCGGAATTCGTGGTGTAGCGGTGAAATGCTTAGATAT	Xu	Prevotella	80% Study
5038277b44b9af0d606e7b634f066f70	AGCGCAGGCCGCCTATTAAGCGTGCCGTGAAATGCCGCGGCTCAACCGTGGCACTGCGGCGCGAACTGGTGGGCTTGGGTGCGCGGAAGACAGGCGGAATTCGTGGTGTAGCGGTGAAATGCTTAGATAT	Xu	Prevotella	80% Study
ee078d806a5314c5794075aa57162fa6	AGCGCAGGCCGCCTGTTAAGCGTGCCGTGAAATGTGCCGGCTCAACCGGGGCACTGCGGCGCGAACTGGCGGGCTTGAGTGCGCGGAAGGCGGGCGGAATTCGTGGTGTAGCGGTGAAATGCTTAGATAT	Xu	Prevotella	80% Study
c30273d335b43d4afeb0b38005e93632	AGCGTAGGCCGCGCGTCAAGCGTGCCGTGAAATGCCGTGGCTCAACCATGGCACCGCGGCGCGAACTGTCGCGCTTGAGTGGGCCCGAGGCAGGCGGAATTCGTGGTGTAGCGGTGAAATGCTTAGATAT	Xu	Prevotella	80% Study
7bbbe2f24d5d06aa8d1b086a39819858	CAATGGGCGTAAGCCTGAACCAGCCAAGTAGCGTGCAGGATGACGGCCCTATGGGTTGTAAACTGCTTTTAAGCGGGGATAAAGTCAGGGACGTGTCCCTGTTTGCAGGTACCGCTTGAATAAGGACCGG	Xu	Prevotella	80% Study
4c5c0750824bb363d3fc0b6acf651ba3	CAATGGGCGGAAGCCTGAACCAGCCAAGTAGCGTGCAGGAAGACGGCCCTATGGGTTGTAAACTGCTTTTAAGCGGGGATAAAGTCAGGGACGTGTCCCTGTTTGCAGGTACCGCTTGAATAAGGACCGG	Xu	Prevotella	80% Study
191b1835ea85a0797337998f176557bc	CAATGGGCGGAAGCCTGAACCAGCCAAGTAGCGTGCAGGAAGACGGCCCTATGGGTTGTAAACTGCTTTTGTGCGGGAATAAAGCGGGTCACGTGTGACCCTTTGCATGTACCGTACGAATAAGGACCGG	Xu	Prevotella	80% Study
86caf3c32b642e1082fdc6bf09224e85	CAATGGGCGTAAGCCTGAACCAGCCAAGTAGCGTGCAGGATGACGGCCCTATGGGTTGTAAACTGCTTTTGTGCGGGAATAAAGTGCGCGACGTGTTGCGTATTGCATGTACCGCATGAATAAGGACCGG	Xu	Prevotella	80% Study
fda326053f9cf014bbcf0c59de1340e0	CAATGGGCGTAAGCCTGAACCAGCCAAGTAGCGTGCAGGAAGACGGCCCTATGGGTTGTAAACTGCTTTTGTGCGGGAATAAAGCGGGTCACGTGTGACCCTTTGCATGTACCGTACGAATAAGGACCGG	Xu	Prevotella	80% Study
ed4b4d60f3a2c02ea33deb32b3319622	CAATGGGCGTAAGCCTGAACCAGCCAAGTAGCGTGAGGGAGGACGGCCCTATGGGTTGTAAACCTCTTTTGTACGGGGATAAAGTGTGGGACGTGTCCCATATTGCAGGTACCGTACGAATAAGGACCGG	Xu	Prevotella	80% Study
c831804998157d82fa8d6cffc9954d80	CAATGGGCGATAGCCTGAACCAGCCAAGTAGCGTGCAGGATGACGGCCCTATGGGTTGTAAACTGCTTTTGTGCGGGAATAAAGTGCGCGACGTGTCGCGTATTGCATGTACCGCATGAATAAGGACCGG	Xu	Prevotella	80% Study
c0aba8838c5533796eaa60ee96fb5327	AGCGTAGGCGGATTTTTAAGTCAGTTGTGAAAGTTCACGGCCCAACCGTGAAATTGCAGTTGAAACTGAAAGTCTTGAGTGCACGCAGGGATGCTGGAATTCGTGGTGTAGCGGTGAAATGCTTAGATAT	Xu	Prevotella	80% Study
f3a75346882be1b52362d7cc63592f98	CGCGCAGGCGGTTTCATAAGTCTGTCTTAAAAGTGCGGGGCTTAACCCCGTGAGGGGACGGAAACTGTGAGACTGGAGTGTCGGAGAGGAAAGCGGAATTCCTAGTGTAGCGGTGAAATGCGTAGATATT	Xu	Megasphaera	80% Study
25168bfdf84f3ff379651ce4dffcf557	CAATGGGCGAAAGCCTGACGGAGCAACGCCGCGTGAGCGAAGACGGCCTTCGGGTTGTAAAGCTCTGTTATACGGGACGAACGGCTAGTGTGCCAATACCACATTAGAATGACGGTACCGTAAGAGAAAG	Xu	Megasphaera	80% Study
c07a42e23cc084f239ffb5564f28b484	GGAGCAGGCGGCAGTGCAGGTCTGCGGTGAAAGACCGGAGCTAAACTTCGGTAAGCCGTGGAAACCGCACAGCTAGAGAGCATCAGAGGATCGCGGAATTCCATGTGTAGCGGTGAAATGCGTAGATATA	Xu	Coprobacillus	80% Study
180815fe58595e5c86df58a91ef7e0d4	GGAGCAGGCGGCAGTGCAGGTCTGCGGTGAAAGCCCGAAGCTAAACTTCGGTAAGCCGTGGAAACCGCACAGCTAGAGAGCATCAGAGGATCGCGGAATTCCATGTGTAGCGGTGAAATGCGTAGATATA	Xu	Coprobacillus	80% Study
749f5df73c3204beee93b41aafc9058b	TGCGTAGGCGGTTTTGCAAGTCAGGAGTGAAATCCATGGGCTTAACCCATGAACTGCTTTTGAAACTGCAAGACTTGAGTGAAGTAGAGGTAGGCGGAATTCCCGGTGTAGCGGTGAAATGCGTAGAGAT	Xu	Ruminococcus	80% Study
2285139e46aeea3f7e050de7a99ae0c7	TGCGTAGGCGGAAGAGCAAGTCAGTAGTGAAATCCATGGGCTTAACCCGTGAACTGCTATTGAAACTGTTTTTCTTGAGTGAAGTAGAGGTAGGCGGAATTCCCGGTGTAGCGGTGAAATGCGTAGAGAT	Xu	Ruminococcus	80% Study
63331678fa4b92a7fd153057b24548c7	TGCGTAGGCGGATCTGCAAGTCAGTAGTGAAATCCCAGGGCTTAACCCTGGAACTGCTATTGAAACTGTGGGTCTTGAGTGAGGTAGAGGCAGGCGGAATTCCCGGTGTAGCGGTGAAATGCGTAGAGAT	Xu	Ruminococcus	80% Study
0f5ccc4108d2e7df9467ed05abfbd3f0	TGCGTAGGCGGCTCTGCAAGTCAGAAGTGAAATCCATGGGCTTAACCCATGAACTGCTTTTGAAACTGTAGAGCTTGAGTGAAGTAGAGGTAGGCGGAATTCCCGGTGTAGCGGTGAAATGCGTAGAGAT	Xu	Ruminococcus	80% Study
f0d54e7a74845a34256ad03a737676bb	TGCGTAGGCGGCTTTGCAAGTCAGAAGTGAAATCCATGGGCTTAACCCATGAACTGCTTTTGAAACTGTAGAGCTTGAGTGAAGTAGAGGTAGGCGGAATTCCCGGTGTAGCGGTGAAATGCGTAGAGAT	Xu	Ruminococcus	80% Study
75654e37d48169b3b52f63ea4e4d0601	TGCGTAGGCGGTTTGGTAAGTCAGAAGTGAAATCCATGGGCTTAACCCATGAACTGCTTTTGAAACTATCGAACTTGAGTGAAGTAGAGGTAGGCGGAATTCCCGGTGTAGCGGTGAAATGCGTAGAGAT	Xu	Ruminococcus	80% Study
b7326c792251fbd44da2126d607a2823	TGCGTAGGCGGATTGGCAAGTCAGAAGTGAAATCCATGGGCTTAACCCATGAACTGCTTTTGAAACTGTTAATCTTGAGTGAAGTAGAGGTAGGCGGAATTCCCGGTGTAGCGGTGAAATGCGTAGAGAT	Xu	Ruminococcus	80% Study
3ba5e54117766e2085a84f41cd1b90cc	TGCGTAGGCGGTTTGGTAAGTCAGAAGTGAAATCCATGGGCTTAACCCATGAACTGCTTTTGAAACTATCGGACTTGAGTGAAGTAGAGGTAGGCGGAATTCCCGGTGTAGCGGTGAAATGCGTAGAGAT	Xu	Ruminococcus	80% Study
e5c0d0407cca9155677405ae5eae5fd3	TGCGTAGGCGGCAGAGCAAGTCAGATGTGAAATCCGTGGGCTTAACCCACGAACTGCATTTGAAACTGTTTTGCTTGAGTGAAGTAGAGGCAGGCGGAATTCCCTGTGTAGCGGTGAAATGCGTAGAGAT	Xu	Ruminococcus	80% Study
446ba72b75a1d0adc75d0508cb5e94a7	TGCGTAGGCGGACTGGCAAGTCAGTGGTGAAAACTATGGGCTTAACCCATAGACTGCCATTGAAACTGTTGGTCTTGAGTGAAGTAGAGGTAGGCGGAATTCCCGGTGTAGCGGTGAAATGCGTAGAGAT	Xu	Ruminococcus	80% Study
ed159b31c245e53ba7768dc623afdd54	TGCGTAGGCGGAAGAGCAAGTCAGTAGTGAAATCTGGGGGCTTAACCCCCAAACTGCTATTGAAACTGTTCTTCTTGAGTGGAGTAGAGGTAGGCGGAATTCCCGGTGTAGCGGTGAAATGCGTAGAGAT	Xu	Ruminococcus	80% Study
ddda11c05cb1b39ffaff9aeae1c09bed	AGCGTAGGCGGGACTGCAAGTCAGATGTGAAAATTATGGGCTCAACCCATAACCTGCATTTGAAACTGTGGTTCTTGAGTGAAGTAGAGGTAAGCGGAATTCCTAGTGTAGCGGTGAAATGCGTAGATAT	Xu	Ruminococcus	80% Study
916e7ec86796a14b712f54ff42b3a32f	TGCGCAGGCGGCCAGGCAAGTCAGGCGTGAAAACTGTGGGCTTAACCCGCAGACTGCGTTTGAAACTGCATGGCTTGAGTGAAGTAGAGGCAGGCGGAATTCCCGGTGTAGCGGTGAAATGCGTAGAGAT	Xu	Ruminococcus	80% Study
c4c3614f3ad8c4491b18fef5c38f8e47	TGCGTAGGCGGACTGGCAAGTCAGTGGTGAAAACTATGGGCTTAACCCATAGACTGCCATTGAAACTGTTGGTCTTGAGTGAAGTAGAGGCAGGCGGAATTCCCGGTGTAGCGGTGAAATGCGTAGAGAT	Xu	Ruminococcus	80% Study
322cbb4c82f027b8738f577b841e75e3	TGCGTAGGCGGAAGAGCAAGTCAGTAGTGAAATCTGGGGGCTTAACCCCCAAACTGCTATTGAAACTGTTTTTCTTGAGTGAAGTAGAGGTAGGCGGAATTCCCGGTGTAGCGGTGAAATGCGTAGAGAT	Xu	Ruminococcus	80% Study
0211b4ca7f53205891c49ade94d36d94	CAATGGGGGAAACCCTGAACCAGCAACGCCGCGTGAGGGAAGACGGTTTTCGGATTGTAAACCTCTGTCCTCTGTGAAAATGATGATGGTAGCAGAGGAGGAAGCTCCGGCTAACTACGTGCCAGCAGCC	Xu	Ruminococcus	80% Study
6308f01795637ba8919b570021ba4871	AGCGCAGGCGGAAGAATAAGTCTGATGTGAAAGCCCTCGGCTTAACCGAGGAACTGCATCGGAAACTGTTTTTCTTGAGTGCAGAAGAGGAGAGTGGAACTCCATGTGTAGCGGTGGAATGCGTAGATAT	Xu	Lactobacillus	80% Study
b5e0738aa213f643df14ef364f196408	AACGCAGGCGGTCTTTTAAGTCTGATGTGAAAGCCTTCGGCTTAACCGGAGTAGTGCATTGGAAACTGGGAGACTTGAGTGCAGAAGAGGAGAGTGGAACTCCATGTGTAGCGGTGAAATGCGTAGATAT	Xu	Lactobacillus	80% Study
12a39fc6fcb442b495316a0a06f97283	AACGCAGGCGGTCTTTTAAGTCTGATGTGAAAGCCTTCGGCTTAACCGGAGTAGTGCATTGGAAACTGGAAGACTTGAGTGCAGAAGAGGAGAGTGGAACTCCATGTGTAGCGGTGAAATGCGTAGATAT	Xu	Lactobacillus	80% Study
6040a9279235924ab305ef63c88a28b6	AACGCAGGCGGTTTTTTAAGTCTGATGTGAAAGCCTTCGGCTTAACCGGAGATGTGCATTGGAAACTGGAAGACTTGAGTGCAGAAGAGGAGAGTGGAACTCCATGTGTAGCGGTGAAATGCGTAGATAT	Xu	Lactobacillus	80% Study
aeda2ae8ba3cde129d2e750504caad99	AGCGCAGGCGGTTGCTTAGGTCTGATGTGAAAGCCTTCGGCTTAACCGAAGAAGTGCATCGGAAACCGGGCGACTTGAGTGCAGAAGAGGACAGTGGAACTCCATGTGTAGCGGTGGAATGCGTAGATAT	Xu	Lactobacillus	80% Study
f5fe656e43508883a978c1d5ff30649f	AGCGCAGGCGGTTTTCTAAGTCTGATGTGAAAGCCTTCGGCTTAACCGAAGAAGTGCATCGGAAACTGGATGACTTGAGTGCAGAAGAGGGCAGTGGAACTCCATGTGTAGCGGTGGAATGCGTAGATAT	Xu	Lactobacillus	80% Study
4678d6575e5695185ba0c07e1201e1d8	AGCGCAGGCGGTTGCTTAGGTCTGATGTGAAAGCCTTCGGCTTAACCGAAGAAGGGCATCGGAAACCGGGCGACTTGAGTGCAGAAGAGGACAGTGGAACTCCATGTGTAGCGGTGGAATGCGTAGATAT	Xu	Lactobacillus	80% Study
5d5b727b001b77ffdf3ad0c0468ea042	AGCGCAGGCGGTTTTCTAAGTCTGATGTGAAAGCCTTCGGCTTAACCGAAGAAGGGCATCGGAAACTGGATGACTTGAGTGCAGAAGAGGGCAGTGGAACTCCATGTGTAGCGGTGGAATGCGTAGATAT	Xu	Lactobacillus	80% Study
aec17a746008c29e141b688ff0f743fb	AGCGCAGGCGGTTGCTTAGGTCTGATGTGAAAGCCTTCGGCTTAACCGAAGAAGTGCATCGGAAACCGGGCAACTTGAGTGCAGAAGAGGACAGTGGAACTCCATGTGTAGCGGTGGAATGCGTAGATAT	Xu	Lactobacillus	80% Study
0cb1aa5e30815db502ebcfa619fa454e	CAATGGACGCAAGTCTGATGGAGCAACGCCGCGTGAGTGAAGAAGGTTTTCGGATCGTAAAGCTCTGTTGTTGGTGAAGAAGGATAGAGGTAGTAACTGGCCTTTATTTGACGGTAATCAACCAGAAAGT	Xu	Lactobacillus	80% Study
4f462d86e0499b5c08e7b30d1a943162	CAATGGACGCAAGTCTGATGGAGCAACGCCGCGTGAGTGAAGAAGGTCTTCGGATCGTAAAACTCTGTTGTTAGAGAAGAACACGAGTGAGAGTAACTGTTCATTCGATGACGGTATCTAACCAGCAAGT	Xu	Lactobacillus	80% Study
8ab4bc6bc3cd0eb6aada31081bb75548	AGCGCAGGCGGAAAAATAAGTCTGATGTGAAAGCCCTCGGCTTAACCGAGGAACTGCATCGGAAACTGTTTTTCTTGAGTGCAGAAGAGGAGAGTGGAACTCCATGTGTAGCGGTGGAATGCGTAGATAT	Xu	Lactobacillus	80% Study
0d8e186c537878c8830d4ad2b13ba669	AGTGCAGGCGGTTCAATAAGTCTGATGTGAAAGCCTTCGGCTCAACCGGAGAATTGCATCAGAAACTGTTGAACTTGAGTGCAGAAGAGGAGAGTGGAACTCCATGTGTAGCGGTGGAATGCGTAGATAT	Xu	Lactobacillus	80% Study
2cc286a722602a0adace20549d154c16	AACGCAGGCGGTCCTTTAAGTCTGATGTGAAAGCCTTCGGCTTAACCGAAGAATTGCATTGGAAACTGGAGGACTTGAGTGCAGAAGAGGAGAGTGGAACTCCATGTGTAGCGGTGAAATGCGTAGATAT	Xu	Lactobacillus	80% Study
581d192498e15b48812efa6284a4ad4b	CGCGTAGGCGGGGTAGTAAGTCAGATGTGAAATCCTATGGCTTAACCATAGAACTGCATTTGAAACTACTACTCTAGAGTATGGGAGAGGTAGGTGGAATTCTTGGTGTAGGGGTAAAATCCGTAGAGAT	Xu	Helicobacter	80% Study
0e74b2fe2fcff23bee27f090c084dae9	CAATGGGGGAAACCCTGAAGCAGCAACGCCGCGTGGAGGATGAAGGTTTTCGGATTGTAAACTCCTTTTGTTAGAGAAGATAATGACGGTACCTAACGAATAAGCACCGGCTAACTCCGTGCCAGCAGCC	Xu	Helicobacter	80% Study
22178114591a88c7da56676cec1de377	TGCGTAGGTGGCACGATAAGTCTGTAGTAAAAGGCAGCGGCTCAACCGCTGTTGGCTATGGAAACTGTCGAGCTGGAGTGCAGAAGAGGGCGATGGAATTCCATGTGTAGCGGTAAAATGCGTAGATATA	Xu	cc_115	80% Study
aeb2a7d5c8965f92f676434f55898e75	TGCGTAGGTGGCACGATAAGTCTGGAGTAAAAGGGAGCGGCTCAACCGCTGTTGGCTCTGGAAACTGTCGAGCTAGAGAGCAGGAGAGGGCGATGGAATTCCATGTGTAGCGGTAAAATGCGTAGATATA	Xu	cc_115	80% Study
c1f4fe75ab0e672bffddd419f8f0de9a	TGCGTAGGTGGCACGTTAAGTCTGGAGTAAAAGGGAGCGGCTCAACCGCTGTTGGCTCTGGAAACTGGCGAGCTAGAGTGCAGGAGAGGGCGATGGAATTCCATGTGTAGCGGTAAAATGCGTAGATATA	Xu	cc_115	80% Study
983805b421162a298126c9afb711411a	TGCGTAGGTGGCACGTTAAGTCTGGAGTAAAAGGCAGCGGCTCAACCGCTGTTGGCTCTGGAAACTGGCGAGCTGGAGTGCAGAAGAGGGCGATGGAACTCCATGTGTAGCGGTAAAATGCGTAGATATA	Xu	cc_115	80% Study
d2da3c18bfa2d89e08102b15f5078b89	TGCGTAGGTGGTCTTTTAAGTCAGCGGTGAAAGTTTGTGGCTCAACCATAAAATTGCCATTGAAACTGGGAGACTTGAGTATGTTTGAGGTAGGCGGAATGCGTGGTGTAGCGGTGAAATGCATAGATAT	Xu	Parabacteroides	80% Study
3595b017273b3640f42db8dbe4b39c2a	CAATGGCCGGAAGGCTGAACCAGCCAAGTCGCGTGAAGGAAGAAGGATCTATGGTTTGTAAACTTCTTTTGTACGGGGGTAAAATGAGGGACGTGTCCCTTATTGCAAGTACCGTACGAATAAGCATCGG	Xu	Parabacteroides	80% Study
66ee0f839238ea1d792f7aee45ac523d	CAATGGCCGGAAGGCTGAACCAGCCAAGTCGCGTGGAGGAAGAAGGATCTATGGTTTGTAAACTTCTTTTGTGCGGGGGTAAAGGTCGGTATGTATACCGCATTGAAAGTACCGCACGAATAAGCATCGG	Xu	Parabacteroides	80% Study
fe2c2e4b70e1414b57c4fb6b688913c8	CAATGGCCGGAAGGCTGAACCAGCCAAGTCGCGTGGAGGAAGAAGGATCTATGGTTTGTAAACTTCTTTTGTGCGGGGGTAAAGGTCGGTACGTGTACCGATTTGCAAGTACCGCACGAATAAGCATCGG	Xu	Parabacteroides	80% Study
e04420ebf0a5e9c063cce460dcc2f2cf	CAATGGCCGGAAGGCTGAACCAGCCAAGTCGCGTGAAGGAAGAAGGATCTATGGTTTGTAAACTTCTTTTGTACGGGGGTAAAGAGAGGGACGTGTCCCTTATTGCAAGTACCGTACGAATAAGCATCGG	Xu	Parabacteroides	80% Study
b0a0d839d0be0a913f62c22c69d7bff4	CAATGGCCGGAAGGCTGAACCAGCCAAGTCGCGTGGAGGAAGAAGGATCTATGGTTTGTAAACTTCTTTTGTGCGGGGGTAAAGGGCGGTATGTATACCGCATTGAAAGTACCGCACGAATAAGCATCGG	Xu	Parabacteroides	80% Study
48910a78fe2232b26c346965f3915b81	CAATGGCCGGAAGGCTGAACCAGCCAAGTCGCGTGAAGGATGAAGGATCTATGGTTTGTAAACTTCTTTTGTACGGGGGTAAAGTGAGGGACGCGTCCCTTATTGCAAGTACCGTACGAATAAGCATCGG	Xu	Parabacteroides	80% Study
9e10e76bac156fda93f968e5cd9f295a	CAATGGCCGGAAGGCTGAACCAGCCAAGTCGCGTGGAGGAAGAAGGATCTATGGTTTGTAAACTTCTTTTGTGCGGGGGTAAAGGTCGGTACGCGTACCGATTTGCAAGTACCGCACGAATAAGCATCGG	Xu	Parabacteroides	80% Study
e0a8d4acbcd404dad643c81d8c40e1d0	CAATGGCCGTAAGGCTGAACCAGCCAAGTCGCGTGAAGGAAGAAGGATCTATGGTTTGTAAACTTCTTTTGTACGGGGGTAAAGTGAAGGACGTGTCCTTTATTGCAAGTACCGTACGAATAAGCATCGG	Xu	Parabacteroides	80% Study
1043d114079f0d7b9982c43421680b37	CAATGGGCGATAGCCTGAACCAGCCAAGTCGCGTGAGGGATGAAGGCCCTACGGGTCGTAAACCTCTTTTATAAGGGAATAAAGTGTGGGACGTGTCCCATTTTGTATGTACCTTATGAATAAGCATCGG	Xu	Parabacteroides	80% Study
12d978e525932ba3c01a6cb566b22bf2	CAATGGCCGGAAGGCTGAACCAGCCAAGTCGCGTGAAGGATGAAGGATCTATGGTTTGTAAACTTCTTTTGTACGGGGGTAAAGTGAGGGACGTGTCCCTTATTGCAAGTACCGTACGAATAAGCATCGG	Xu	Parabacteroides	80% Study
491b0fc811add9f97d32b9959367fa67	CAATGGCCGAGAGGCTGAACCAGCCAAGTCGCGTGAAGGAAGAAGGATCTATGGTTTGTAAACTTCTTTTATACGGGAATAAAGTGTGGAACGTGTTCCATTTTGTATGTACCGTATGAATAAGCATCGG	Xu	Parabacteroides	80% Study
f4612dce07063784d159aa354dc74ea2	AGCGCAGGCGGGAAATTAAGCGGACTTTAAAAGTGCGGGGCTCAACCCCGTGAGGGGGTCCGAACTGATTTTCTTGAGTGCAGGAGAGGGAAGCGGAATTCCTAGTGTAGCGGTGAAATGCGTAGATATT	Xu	Megamonas	80% Study
5267ee6f263948271e9e558140cae589	AGCGCAGGCGGGAAACTAAGCGGATCTTAAAAGTGCGGGGCTCAACCCCGTGATGGGGTCCGAACTGGTTTTCTTGAGTGCAGGAGAGGAAAGCGGAATTCCCAGTGTAGCGGTGAAATGCGTAGATATT	Xu	Megamonas	80% Study
668b7f9bc9d1071a828512ab80dc07bf	CAATGGGCGAAAGCCTGACGGAGCAACGCCGCGTGAACGATGAAGGTCTTAGGATCGTAAAGTTCTGTTGTTAGGGACGAAGGGTAAGAATCATAATACGGTTTTTATTTGACGGTACCTAACGAGGAAG	Xu	Megamonas	80% Study
1d8575369f31dff32eda730cc5da3838	CAATGGGCGAAAGCCTGACGGAGCAACGCCGCGTGAACGAAGAAGGTCTTAGGATCGTAAAGTTCTGTTGTTAGGGGCGAAGGGCGATAGTTTAAATAAGGCTATTGTTTGACGGTACTTAACGAGGAAG	Xu	Megamonas	80% Study
8121626c102f0e7ad488674bd531c7e5	CAATGGGCGAAAGCCTGACGGAGCAACGCCGCGTGAACGATGAAGGTCTTAGGATCGTAAAGTTCTGTTGTTAGGGACGAAGGGTAAGAATCATAATAAGGTTTTTATTTGACGGTACCTAACGAGGAAG	Xu	Megamonas	80% Study
b765e1ee4de1c5a578e23a7ac8408da8	CAATGGGCGAAAGCCTGACGGAGCAACGCCGCGTGAACGAAGAAGGTCTTAGGATCGTAAAGTTCTGTTGTTAGGGGCGAAGGGCAACATTTTGAATAAGGGTGTTGTTTGACGGTACTTAACGAGGAAG	Xu	Megamonas	80% Study
ad7fd24de90914eae73fd58a99225146	CAATGGGCGAAAGCCTGACGGAGCAACGCCGCGTGAACGATGAAGGTCTTAGGATCGTAAAGTTCTGTTGTTAGGGACGAAGGGTAAGAATAATAATACGGTTTTTATTTGACGGTACCTAACGAGGAAG	Xu	Megamonas	80% Study
73fc887a7d0d78d0dd664a322350947f	CAATGGGCGAAAGCCTGACGGAGCAACGCCGCGTGAATGAAGAAGGTCTTAGGATCGTAAAGTTCTGTTGTTAGGGGCGAAGGGCAACATTTTGAATAAGGGTGTTGTTTGACGGTACTTAACGAGGAAG	Xu	Megamonas	80% Study
126bdaa96820007fba0c2481590977db	CAATGGGCGAAAGCCTGACGGAGCAACGCCGCGTGAACGAAGAAGGTCTTAGGATCGTAAAGTTCTGTTGTTAGGGGCGAAGGGTGCTACTTTGAATAAGGGTAGTATTTGACGGTACTTAACGAGGAAG	Xu	Megamonas	80% Study
39c96ea4733dcee22f3cda51ff3a8da1	AGCGCAGGCGGGAAACTAAGCGGATCTTAAAAGTGCGGGGCTCAACTCCGTGATGGGGTCCGAACTGGTTTTCTTGAGTGCAGGAGAGGAAAGCGGAATTCCCAGTGTAGCGGTGAAATGCGTAGATATT	Xu	Megamonas	80% Study
54b7794fcace34ca49cc1c876f0d1509	GGAGCAGGCGGCGGCAGAGGTCTGTGGTGAAAGACTGAAGCTTAACTTCAGTAAGCCATAGAAACCGGGCTGCTAGAGTGCAGGAGAGGATCGTGGAATTCCATGTGTAGCGGTGAAATGCGTAGATATA	Xu	Clostridium	80% Study
82adf22bcc2928ef5e73f544c16dd5ae	GGAGCAGGCGGCAGCAAGGGTCTGTGGTGAAAGGCTGAAGCTTAACTTCAGTGTGCCAGAGAAACCGGGCAGCTAGAGTGCAGGAGAGGATCGTGGAATTCCATGTGTAGCGGTGAAATGCGTAGATATA	Xu	Clostridium	80% Study
dd31b643a75f017cade479dd6173253c	CAATGGGGGGAACCCTGACCGAGCAACGCCGCGTGAAGGAAGAAGGAATTCGTTCTGTAAACTTCTGTTATAAAGGAAGAACGGCACATATAGGGAATGATATGTGAGTGACGGTACTTTATGAGGAAGC	Xu	Clostridium	80% Study
6e9dc99126d38133f1da0fee42464991	TCCGTAGCCGGTTTATTAAGTCTCTGGTGAAATCCTGTAGCTTAACTGTGGGAATTGCTGGAGATACTAGTAGACTTGAGATCGGGAGAGGTTAGAGGTACTCCCAGGGTAGAGGTGAAATTCTGTAATC	Xu	Methanobrevibacter	80% Study
1ea01d4745cc09fd8780aeb0a0f93ccd	TGCGTAGGCGGCACGACAAGTCAGCGGTGAAATACCCGGGCTCAACCCGGGAGCTGCCGTTGAAACTGCCGAGCTAGCGTGTACAAGAGGCAGGCGGAATGCGTGGTGTAGCGGTGAAATGCATAGATAT	Xu	Barnesiella	80% Study
03313900e5ac350c375ab977b1edeea0	TGCGTAGGCGGCACGCCAAGTCAGCGGTGAAATGCCCGGGCTTAACCCGGGAGCTGCCGTTGAAACTGGCGAGCTAGCGTGCACAAGAGGCAGGCGGAATGCGTGGTGTAGCGGTGAAATGCATAGATAT	Xu	Barnesiella	80% Study
00c33034517107bf89641f56234a37e6	TGCGTAGGCGGCATGACAAGTCAGCGGTGAAATGCCCGGGCTTAACCCGGGAGCTGCCGTTGAAACTGTCGAGCTAGCGTGCACAAGAGGTAGGCGGAATGCGTGGTGTAGCGGTGAAATGCATAGATAT	Xu	Barnesiella	80% Study
81a213f8068964e5126776f7b4368685	TGCGTAGGCGGCACGCCAAGTCAGCGGTGAAATACCCGGGCTTAACCCGGGAGCTGCCGTTGAAACTGACGAGCTAGAGTACACAAGAGGCAGGCGGAATGCGTGGTGTAGCGGTGAAATGCATAGATAT	Xu	Barnesiella	80% Study
9b9d3f434f5ad819a65480ed3d04d950	TGCGTAGGCGGCGCGCCAAGTCAGCGGTGAAATCCCCGGGCTCAACCCGGGATCTGCCGTTGAAACTGGCGAGCTAGCGTGCACAAGAGGCAGGCGGAATGCGTGGTGTAGCGGTGAAATGCATAGATAT	Xu	Barnesiella	80% Study
3d0e31192bffdc70ab80761a1e86bfb5	TGTGTAGGCGGCACGCCAAGTCAGCGGTGAAATGCCCGGGCTTAACCCGGGAGCTGCCGTTGAAACTGGCGAGCTAGCGTGCACAAGAGGCAGGCGGAATGCGTGGTGTAGCGGTGAAATGCATAGATAT	Xu	Barnesiella	80% Study
39599f19462438a85d93e24cf8dbfaab	TGCGTAGGCGGCACGACAAGTCAGCGGTGAAATACCCGGGCTCAACCCGGGAGCTGCCGTTGAAACTGCCGGGCTAGCGTGTACAAGAGGCAGGCGGAATGCGTGGTGTAGCGGTGAAATGCATAGATAT	Xu	Barnesiella	80% Study
5ae7e93ed9d878f4d687e6db565cb981	TGCGTAGGCGGCGCGCCAAGTCAGCGGTGAAATCCCCGGGCTCAACCCGGGAGTTGCCGTTGAAACTGGCGAGCTAGCGTGCACAAGAGGCAGGCGGAATGCGTGGTGTAGCGGTGAAATGCATAGATAT	Xu	Barnesiella	80% Study
8450d9e99c6ea3e55eafaa7bd7560649	CAATGGTCGGCAGACTGAACCAGCCAAGTCGCGTGAAGGAAGACGGCCCTACGGGTTGTAAACTTCTTTTGTCGGAGAGTAAAGTGCGCTACGCGTAGCGTATTGCAAGTATCCGAAGAAAAAGCATCGG	Xu	Barnesiella	80% Study
980fc8d4833f947f5aab28ecb228c090	CAATGGTCGGCAGACTGAACCAGCCAAGTCGCGTGAAGGAAGACGGCCCTACGGGTTGTAAACTTCTTTTGTCGGAGAGTAAAGGGCACTACGTGTAGTGTTTTGCAAGTATCCGAAGAAAAAGCATCGG	Xu	Barnesiella	80% Study
abfa101de847763e22f4ab0665a482dc	TGCGTAGGCGGCACGCCAAGTCAGCGGTGAAATGCCCGGGCTCAACCCGGGAGCTGCCGTTGAAACTGGCGAGCTAGCGTGCACAAGAGGCAGGCGGAATGCGTGGTGTAGCGGTGAAATGCATAGATAT	Xu	Barnesiella	80% Study
1682835c39e6427c1ce09b1b6c7f2d38	AGCGCAGGCGGACCGGCAAGTTGGAAGTGAAAACCATGGGCTCAACCCATGAATTGCTTTCAAAACTGCTGGCCTTGAGTAGTGCAGAGGTAGGTGGAATTCCCGGTGTAGCGGTGGAATGCGTAGATAT	Xu	Gemmiger	80% Study
2c7dbfdc9cc77cca568ec2ceb8a4f501	CACGTAGGTGGTTTGTTAAGTCAGGGGTGAAATCCCACAGCCCAACTGTGGAACTGCCCTTGATACTGGCAGACTTGAGTACCGGAGAGGGTGGCGGAATTCCAGGTGTAGGAGTGAAATCCGTAGATAT	Xu	Bilophila	80% Study
3c6efd5e14795ae41229add8b807a036	CACGTAGGCGGTTTGTTAAGTCAGGGGTGAAATCCCACAGCCCAACTGTGGAACTGCCCTTGATACTGGCAGACTTGAGTACCGGAGAGGGTGGCGGAATTCCAGGTGTAGGAGTGAAATCCGTAGATAT	Xu	Bilophila	80% Study
625901921b8a0a68dda18d9e304eb468	AGCGTAGACGGAGCAGCAAGTCTGATGTGAAAGGCAGGGGCTCAACCCCTGGACTGCATTGGAAACTGTTGATCTTGAGTACCGGAGGGGTAAGCGGAATTCCTAGTGTAGCGGTGAAATGCGTAGATAT	Xu	Blautia	80% Study
6e5c554ea49485cae687d688557fd57e	AGCGTAGACGGACGGGCAAGTCTGGTGTGAAAGGCAGGGGCCCAACCCCTGGACTGCATTGGAAACTGCCCGTCTTGAGTGCCGGAGAGGTAAGCGGAATTCCTAGTGTAGCGGTGAAATGCGTAGATAT	Xu	Blautia	80% Study
74b2376b59ac38c95667297954602114	AGCGTAGACGGAGAGGCAAGTCTGATGTGAAAGGCAGGGGCTTAACCCCTGGACTGCATTGGAAACTGTTTTTCTGGAGTGCCGGAGAGGTAAGCGGAATTCCTAGTGTAGCGGTGAAATGCGTAGATAT	Xu	Blautia	80% Study
7627b03f58c9cd55b09dfd594b98ae93	CAATGGGGGAAACCCTGATGCAGCGACGCCGCGTGAAGGAAGAAGTATCTCGGTATGTAAACTTCTATCAGCAGGGAAGAAAATGACGGTACCTGACTAAGAAGCCCCGGCTAACTACGTGCCAGCAGCC	Xu	Blautia	80% Study
1558cc9de8364d8d57288078190b78b1	CAATGGGCGAGAGCCTGAACCAGCCAAGTAGCGTGAAGGATGACTGCCCTATGGGTTGTAAACTTCTTTTATACGGGAATAACACGCGGCACGTGTGCCGCTCTGCATGTACCGTATGAATAAGCATCGG	Zhou	Bacteroides	80% Study
e7c65418afc8909cb84084ffe91d55d3	CAATGGGCGAGAGCCTGAACCAGCCAAGTAGCGTGAAGGATGACTGCCCTACGGGTTGTAAACTTCTTTTATAAGGGAATAAAGTTCTCTACGTGTAGAGTTTTGTATGTACCTTATGAATAAGCATCGG	Zhou	Bacteroides	80% Study
327ae0ddb5399f2a8bf13f2b68ce036d	CAATGGGCGAGAGCCTGAACCAGCCAAGTAGCGTGAAGGATGACTGCCCTATGGGTTGTAAACTTCTTTTATACGGGAATAACATCATCCACGTGTGGGTGTCTGCATGTACCGTATGAATAAGCATCGG	Zhou	Bacteroides	80% Study
400360c9165bcd025c07a939f72e62c9	CAATGGGCGAGAGCCTGAACCAGCCAAGTAGCGTGAAGGATGACTGCCCTACGGGTTGTAAACTTCTTTTATAAGGGAATAAAGTATTCTACGTGTAGAGTTTTGTATGTACCTTATGAATAAGCATCGG	Zhou	Bacteroides	80% Study
4eed35f3dafbcb34876fa75c83e91d96	CAATGGACGAGAGTCTGAACCAGCCAAGTAGCGTGAAGGATGAAGGTCCTACGGATTGTAAACTTCTTTTATAAGGGAATAAACCCTCCCACGTGTGGGAGCTTGTATGTACCTTATGAATAAGCATCGG	Zhou	Bacteroides	80% Study
1bf62f2fbff25cd3ac158e2d065339b7	CAATGGGCGAGAGCCTGAACCAGCCAAGTAGCGTGAAGGATGACTGCCCTATGGGTTGTAAACTTCTTTTATACGGGAATAACACCTTCCACGTGTGGAGGGCTGCATGTACCGTATGAATAAGCATCGG	Zhou	Bacteroides	80% Study
522b3bb04a687c8e9f1687f703d9f0e5	CAATGGGCGAGAGCCTGAACCAGCCAAGTAGCGTGAAGGATGACGGCCCTACGGGTTGTAAACTTCTTTTGTGCGGGAATAAAGGAGCCTACGTGTAGGCTTTTGCATGTACCGTAACGAATAAGCATCG	Zhou	Bacteroides	80% Study
65e95f1b3eca715843c916386580164d	CAATGGGCGAGAGCCTGAACCAGCCAAGTAGCGTGAAGGAAGACTGCCCTATGGGTTGTAAACTTCTTTTATACGGGAATAAAGTCATCCACGTGTGGATGTTTGTATGTACCGTATGAATAAGGATCGG	Zhou	Bacteroides	80% Study
f5aec87f6388c3f0d59bbef91c443ccb	CAATGGACGAGAGTCTGAACCAGCCAAGTAGCGTGAAGGATGAAGGTCCTACGGATTGTAAACTTCTTTTATAAGGGAATAAAACCTTCCACGTGTGGGAGCTTGTATGTACCTTATGAATAAGCATCGG	Zhou	Bacteroides	80% Study
01e8756bd32a90dfcdd18a01e771510c	CAATGGACGAGAGTCTGAACCAGCCAAGTAGCGTGAAGGACGACTGCCCTATGGGTTGTAAACTTCTTTTATATGGGAATAAAAAAGTCCACGTGTGGATTCTTGTATGTACCATATGAATAAGCATCGG	Zhou	Bacteroides	80% Study
181b70255e7ccb1406c0ee483cdf1a17	CAATGGACGAGAGTCTGAACCAGCCAAGTAGCGTGAAGGATGACTGCCCTATGGGTTGTAAACTTCTTTTATATGGGAATAAAAAAGGCCACGTGTGGCCTGTTGTATGTACCTTATGAATAAGCATCGG	Zhou	Bacteroides	80% Study
c24aa9679717ae090482cb5aa5b2a816	CAATGGACGAGAGTCTGAACCAGCCAAGTAGCGTGAAGGATGACTGCCCTATGGGTTGTAAACTTCTTTTATAAGGGAATAAAGTCAGGTACGCGTACCTGTTTGCATGTACCTTATGAATAAGCATCGG	Zhou	Bacteroides	80% Study
253c3aaf50cb0ea051c924634894ad45	CAATGGACGAGAGTCTGAACCAGCCAAGTAGCGTGAAGGATGACTGCCCTATGGGTTGTAAACTTCTTTTATAAGGGAATAAAGTGAGGTACGCGTACCTTTTTGTATGTACCTTATGAATAAGCATCGG	Zhou	Bacteroides	80% Study
f0991a9412a99015d9ffc8e2089690b0	CAATGGACGAGAGTCTGAACCAGCCAAGTAGCGTGAAGGATGAAGGTCCTACGGATTGTAAACTTCTTTTATAAGGGAATAAACCCTTCCACGTGTGGGAGCTTGTATGTACCTTATGAATAAGCATCGG	Zhou	Bacteroides	80% Study
8e1f18241479f9fd987ac28a41544d63	CAATGGACGAGAGTCTGAACCAGCCAAGTAGCGTGAAGGATGACTGCCCTATGGGTTGTAAACTTCTTTTATATGGGAATAAAAAAGTCCACGTGTGGATTCTTGTATGTACCATATGAATAAGCATCGG	Zhou	Bacteroides	80% Study
b38da414968b5711760538d24fa868f7	CAATGGACGAGAGTCTGAACCAGCCAAGTAGCGTGAAGGATGACTGCCCTATGGGTTGTAAACTTCTTTTATACGGGAATAAAGTGAGGCACGCGTGCCTTTTTGTATGTACCGTATGAATAAGCATCGG	Zhou	Bacteroides	80% Study
70507459ebb655ea2379fbdf3acb875d	CAATGGGCGAGAGCCTGAACCAGCCAAGTAGCGTGAAGGATGACGGCCCTACGGGTTGTAAACTTCTTTTGTGCGGGAATAAAGGAACCTACGTGTAGGTTTTTGCATGTACCGTAACGAATAAGCATCG	Zhou	Bacteroides	80% Study
017f389108568471664363ae87a0aa77	CAATGGGCGAGAGCCTGAACCAGCCAAGTAGCGTGGAGGATGACGGTCCTACGGGTTGTAAACTCCTTTTATAAGGGAATAAAACCTCCCACGTGTGGGAGCTTGTATGTACCTTATGAATAAGCATCGG	Zhou	Bacteroides	80% Study
fdb879447526d3cbcbc19735ee78a7b5	CAATGGGCGCAAGCCTGACCCAGCAACGCCGCGTGAAGGAAGAAGGCCCTCGGGTTGTAAACTTCTTTTGTCAGGGACGAAGCAAGTGACGGTACCTGACGAATAAGCCACGGCTAACTACGTGCCAGCA	Zhou	Oscillospira	80% Study
e8848b3dc781ce19d2bd7bce9c4fdd7a	CAATGGGCGCAAGCCTGACCCAGCAACGCCGCGTGAAGGAAGAAGGCTTTCGGGTTGTAAACTTCTTTTGTCAGGGACGAACAAATGACGGTACCTGACGAATAAGCCACGGCTAACTACGTGCCAGCAG	Zhou	Oscillospira	80% Study
82da4148485d6eb448efa10e42ec1d47	CAATGGGCGCAAGCCTGACCCAGCAACGCCGCGTGAAGGAAGAAGGCTTTCGGGTTGTAAACTTCTTTTGTCAGGGAACAGTAGAAGAGGGTACCTGACGAATAAGCCACGGCTAACTACGTGCCAGCAG	Zhou	Oscillospira	80% Study
d7ff55a70157b9e88fa3cb92636e1cf6	CAATGGGCGAAAGCCTGACCCAGCAACGCCGCGTGAAGGAAGAAGGCTTTCGGGTTGTAAACTTCTTTTATCAGGGACGAAGGATGTGACGGTACCTGATGAATAAGCCACGGCTAACTACGTGCCAGCA	Zhou	Oscillospira	80% Study
5009349cab7ff9fee7d658407d8759fa	CAATGGGCGCAAGCCTGACCCAGCAACGCCGCGTGAAGGAAGAAGGCCCTCGGGTTGTAAACTTCTTTTGACAGGGACGAAGTAAGTGACGGTACCTGTCGAATAAGCCACGGCTAACTACGTGCCAGCA	Zhou	Oscillospira	80% Study
2afae6e72587f311561741f29cc450dd	CAATGGGCGCAAGCCTGACCCAGCAACGCCGCGTGAAGGAAGAAGGCCCTCGGGTTGTAAACTTCTTTTGACAGGGACGAAGCAAATGACGGTACCTGTCGAATAAGCCACGGCTAACTACGTGCCAGCA	Zhou	Oscillospira	80% Study
b93b4caf2790de309a7f5b4f40bba945	CAATGGGCGCAAGCCTGACCCAGCAACGCCGCGTGAAGGAAGAAGGCTTTCGGGTTGTAAACTTCTTTTATTAAGGACGAAAGAAATGACGGTACTTAATGAATAAGCTCCGGCTAACTACGTGCCAGCA	Zhou	Oscillospira	80% Study
a2de5a82fbe20bd5a562892b3260b387	CAATGGACGCAAGTCTGACCCAGCAACGCCGCGTGAAGGAAGAAGGCTTTCGGGTTGTAAACTTCTTTTGTCAGGGAACAGTAGAAGAGGGTACCTGACGAATAAGCCACGGCTAACTACGTGCCAGCAG	Zhou	Oscillospira	80% Study
761bd883e9702978f9fe673c5d07a0c2	CAATGGGCGCAAGCCTGACCCAGCAATGCCGCGTGAAGGAAGAAGGCTTTCGGGTTGTAAACTTCTTTTGTCAGGGAAGAGTAGAAGACGGTACCTGACGAATAAGCCACGGCTAACTACGTGCCAGCAG	Zhou	Oscillospira	80% Study
33d94b89596abcb6aeff6ecdca8521ce	CAATGGGCGCAAGCCTGACCCAGCAACGCCGCGTGAAGGAAGAAGGCTTTCGGGTTGTAAACTTCTTTTATTAAGGACGAAACAAATGACGGTACTTAATGAATAAGCTCCGGCTAACTACGTGCCAGCA	Zhou	Oscillospira	80% Study
cad744434058c86c81f746a2306dbbbb	CAATGGGCGCAAGCCTGACCCAGCAACGCCGCGTGAAGGAAGAAGGCTTTCGGGTTGTAAACTTCTTTTATTCGGGACGAAGAAATGACGGTACCGAATGAATAAGCCACGGCTAACTACGTGCCAGCAG	Zhou	Oscillospira	80% Study
d9beb7981c51e7910bfce2fd58ce5830	CAATGGGCGCAAGCCTGACCCAGCAACGCCGCGTGAAGGATGAAGGCTTTCGGGTTGTAAACTTCTTTTATTCGGGACGAAGCAAGTGACGGTACCGAATGAATAAGCCACGGCTAACTACGTGCCAGCA	Zhou	Oscillospira	80% Study
78e7729fd63648440e10d6b73fdc901d	CAATGGGCGCAAGCCTGACCCAGCAACGCCGCGTGAAGGAAGAAGGCTTTCGGGTTGTAAACTTCTTTTCTCAGGGACGAAGGAAGTGACGGTACCTGAGGAATAAGCTCCGGCTAACTACGTGCCAGCA	Zhou	Oscillospira	80% Study
0502b0a1ed8c805c09d31e468ac0dfe6	CAATGGGCGCAAGCCTGACCCAGCAATGCCGCGTGAAGGAAGAAGGCTTTCGGGTTGTAAACTTCTTTTAAGAGGGAAGAGTAGAAGACGGTACCTCTTGAATAAGCCACGGCTAACTACGTGCCAGCAG	Zhou	Oscillospira	80% Study
078e7befe5ed38e1d46644bb93805858	CAATGGGCGAAAGCCTGACCCAGCAACGCCGCGTGAAGGAAGAAGGCTTTCGGGTTGTAAACTTCTTTTATCAGGGACGAAGTAGTGACGGTACCTGATGAATAAGCTCCGGCTAACTACGTGCCAGCAG	Zhou	Oscillospira	80% Study
968dfccd3413010d45f277037c37f70f	CAATGGGCGCAAGCCTGACCCAGCAACGCCGCGTGAAGGAAGAAGGCTTTCGGGTTGTAAACTTCTTTTGTCAGGGAACAGTAGAAGAGGGTACCTGACGAATAAGCTCCGGCTAACTACGTGCCAGCAG	Zhou	Oscillospira	80% Study
50c6ad36b44679ed3432f29cae3aeaf9	CAATGGGCGCAAGCCTGACCCAGCAACGCCGCGTGAAGGAAGAAGGCTTTCGGGTTGTAAACTTCTTTTCTTAGGGACGAAGGAAGTGACGGTACCTAAGGAATAAGCTCCGGCTAACTACGTGCCAGCA	Zhou	Oscillospira	80% Study
a6abb0b99999d96294d23baf693a9c05	CAATGGGCGCAAGCCTGACCCAGCAACGCCGCGTGAAGGAAGAAGGCTTTCGGGTTGTAAACTTCTTTTATTCGGGACGAACAAATGACGGTACCGAATGAATAAGCCACGGCTAACTACGTGCCAGCAG	Zhou	Oscillospira	80% Study
fa1815ef7d6a72eb8e6a6060b3960f31	CAATGGGCGCAAGCCTGACCCAGCAACGCCGCGTGAAGGAAGAAGGCTTTCGGGTTGTAAACTTCTTTTATTCGGGACGATAGTGACGGTACCGAATGAATAAGCCACGGCTAACTACGTGCCAGCAGCC	Zhou	Oscillospira	80% Study
f0ec1884352ad39c2a5b2f2461dd6250	CAATGGGCGCAAGCCTGACCCAGCAACGCCGCGTGAAGGAAGAAGGCTTTCGGGTTGTAAACTTCTTTTATTAAGGACGAAATCAATGACGGTACTTAATGAATAAGCTCCGGCTAACTACGTGCCAGCA	Zhou	Oscillospira	80% Study
c6f86d1d3038440d6de0ef6ffc5993db	CAATGGGCGCAAGCCTGACCCAGCAACGCCGCGTGAAGGAAGAAGGCTTTCGGGTTGTAAACTTCTTTTCTCAGGGACGAAACAAATGACGGTACCTGAGGAATAAGCTCCGGCTAACTACGTGCCAGCA	Zhou	Oscillospira	80% Study
78c9c4dd5367b875741091f5012ba6b7	CAATGGGCGCAAGCCTGACCCAGCAACGCCGCGTGAAGGATGAAGGCTTTCGGGTTGTAAACTTCTTTTATCAGGGACGAAGAAAATGACGGTACCTGATGAATAAGCCACGGCTAACTACGTGCCAGCA	Zhou	Oscillospira	80% Study
14546db56dc03bc0da619dd18f51fe47	CAATGGGCGCAAGCCTGACCCAGCAATGCCGCGTGAAGGAAGAAGGCTTTCGGGTTGTAAACTTCTTTGACGAGGGAAGAGTAGAAGACGGTACCTCGAAAACAAGCCACGGCTAACTACGTGCCAGCAG	Zhou	Oscillospira	80% Study
1ed4cea3dad526b7013cd0aaf2b5667d	CAATGGGCGCAAGCCTGACCCAGCAACGCCGCGTGAAGGAAGAAGGCTTTCGGGTTGTAAACTTCTTTTATTCGGGACGAAGGATGTGACGGTACCGAATGAATAAGCCACGGCTAACTACGTGCCAGCA	Zhou	Oscillospira	80% Study
01ff48876de1c83d673996120dc9d5cb	CAATGGGCGCAAGCCTGACCCAGCAACGCCGCGTGAAGGAAGAAGGCTTTCGGGTTGTAAACTTCTTTTAAGAGGGAACAGAAGAAGAGGGTACCTCTTGAATAAGCCACGGCTAACTACGTGCCAGCAG	Zhou	Oscillospira	80% Study
4357ada0cfddade3377af0aa22fea854	CAATGGGCGCAAGCCTGACCCAGCAACGCCGCGTGAAGGATGAAGGCTTTCGGGTTGTAAACTTCTTTTATTCGGGACGAAACAAATGACGGTACCGAATGAATAAGCCACGGCTAACTACGTGCCAGCA	Zhou	Oscillospira	80% Study
94ae004fab9ae91f19db55f42ec23656	CAATGGGCGCAAGCCTGACCCAGCAACGCCGCGTGAAGGAAGAAGGCTTTCGGGTTGTAAACTTCTTTTATTAAGGACGAAGCAATGACGGTACTTAATGAATAAGCTCCGGCTAACTACGTGCCAGCAG	Zhou	Oscillospira	80% Study
883c45fb8e42f84d665cbfe49b27972c	CAATGGGCGCAAGCCTGACCCAGCAACGCCGCGTGAAGGAAGAAGGCTTTCGGGTTGTAAACTTCTTTTCTTGGGGACGAAACAAATGACGGTACCTAAGGAATAAGCTCCGGCTAACTACGTGCCAGCA	Zhou	Oscillospira	80% Study
63bab829aae7377d829d3b712d095775	CAATGGGGGAAACCCTGACCCAGCAACGCCGCGTGAAGGAAGAAGGCTTTCGGGTTGTAAACTTCTTTTAACAGGGAAGATCATGACGGTACCTGTTGAATAAGCCACGGCTAACTACGTGCCAGCAGCC	Zhou	Oscillospira	80% Study
1039e01fbbd09d024e085c66093311ef	CAATGGGCGCAAGCCTGACCCAGCAACGCCGCGTGAAGGAAGAAGGCTTTCGGGTTGTAAACTTCTTTTATTCGGGACGAAGCAAGTGACGGTACCGAATGAATAAGCCACGGCTAACTACGTGCCAGCA	Zhou	Oscillospira	80% Study
4e78c093321ac2590dc76a95f62149ce	CAATGGGCGCAAGCCTGACCCAGCAACGCCGCGTGAAGGATGAAGGCTTTCGGGTTGTAAACTTCTTTTATTCGGGACGAAGAAAATGACGGTACCGAATGAATAAGCCACGGCTAACTACGTGCCAGCA	Zhou	Oscillospira	80% Study
f0d9b3de5fa82781d5b35282e58ef65a	CAATGGGCGCAAGCCTGACCCAGCAACGCCGCGTGAAGGAAGAAGGCTTTCGGGTTGTAAACTTCTTTTATTGGGGACGAATCGATGACGGTACCCATTGAATAAGCTCCGGCTAACTACGTGCCAGCAG	Zhou	Oscillospira	80% Study
57dbfcd346dd125bb3b3fdbe56e423f1	CAATGGGCGCAAGCCTGACCCAGCAACGCCGCGTGAAGGAAGAAGGCTCTCGGGTTGTAAACTTCTTTTATCAGGGACGAAGCAAGTGACGGTACCTGATGAATAAGCCACGGCTAACTACGTGCCAGCA	Zhou	Oscillospira	80% Study
9010d5c9eaf759761f3cc9b081e9fb24	CAATGGGGGCAACCCTGACCCAGCAATGCCGCGTGAAGGAAGAAGGCTTTCGGGTTGTAAACTTCTTTTGTCAGGGAACAGTCGAAGAGGGTACCTGACGAATAAGCCACGGCTAACTACGTGCCAGCAG	Zhou	Oscillospira	80% Study
4201f69412d3b208b8f98f15b85bca86	CAATGGGCGAAAGCCTGACCCAGCAACGCCGCGTGAAGGAAGAAGGCTTTCGGGTTGTAAACTTCTTTTATCAGGGACGAAGTGAGTGACGGTACCTGATGAATAAGCTCCGGCTAACTACGTGCCAGCA	Zhou	Oscillospira	80% Study
87a6f151c7b97f945372f863fb111997	CAATGGGCGCAAGCCTGACCCAGCAATGCCGCGTGAAGGAAGAAGGCTTTCGGGTTGTAAACTTCTTTTAAGAGGGAAGAGCAGAAGACGGTACCTCTTGAATAAGCCACGGCTAACTACGTGCCAGCAG	Zhou	Oscillospira	80% Study
bab170b603e2cd33f7f5955975a36c01	CAATGGACGCAAGTCTGACCCAGCAACGCCGCGTGAAGGAAGAAGGCTTTCGGGTTGTAAACTTCTTTTAAGAGGGAACAGGAGAAGAGGGTACCTCTTGAATAAGCCACGGCTAACTACGTGCCAGCAG	Zhou	Oscillospira	80% Study
f1dc1342e68dbf404ee037deacbe7b93	CAATGGGCGCAAGCCTGACCCAGCAACGCCGCGTGAAGGAAGAAGGCTTTCGGGTTGTAAACTTCTTTTGTCAGGGAAGAGGAGAAGACTGTACCTGACGAATAAGCTCCGGCTAACTACGTGCCAGCAG	Zhou	Oscillospira	80% Study
3e6368e4819f2504e230b0f6caf539d3	CAATGGGCGCAAGCCTGACCCAGCAACGCCGCGTGAAGGAAGAAGGCTTTCGGGTTGTAAACTTCTTTTGTCAGGGAAGAGCAGAAGACTGTACCTGACGAATAAGCTCCGGCTAACTACGTGCCAGCAG	Zhou	Oscillospira	80% Study
aa9103981bdbcaebc6426d23af3d4678	CAATGGGCGCAAGCCTGACCCAGCAACGCCGCGTGAAGGAAGAAGGCTTTCGGGTTGTAAACTTCTTTTATCAGGGACGAAGGAATGACGGTACCTGATGAATAAGCCACGGCTAACTACGTGCCAGCAG	Zhou	Oscillospira	80% Study
0d7efc1b21e2d47f76098c3fa19e64fe	CAATGGGCGCAAGCCTGACCCAGCAACGCCGCGTGAAGGAAGAAGGCTCTCGGGTTGTAAACTTCTTTTAAGAGGGACGAAACAAATGACGGTACCTCTTGAATAAGCCACGGCTAACTACGTGCCAGCA	Zhou	Oscillospira	80% Study
5c2325050da10c74f1782a80d932bca7	CAATGGGCGCAAGCCTGACCCAGCAACGCCGCGTGAAGGATGAAGGCTTTCGGGTTGTAAACTTCTTTTATCAGGGACGAAACAAATGACGGTACCTGATGAATAAGCCACGGCTAACTACGTGCCAGCA	Zhou	Oscillospira	80% Study
833c369f9867ad1ae128212a3f5d3439	CAATGGGCGCAAGCCTGACCCAGCAACGCCGCGTGAAGGAAGAAGGCTTTCGGGTTGTAAACTTCTTTTGTCAGGGAAGATGAAAGAGACTGTACCTGACGAATAAGCCACGGCTAACTACGTGCCAGCA	Zhou	Oscillospira	80% Study
d44271d8b311d4de0d0720fcd9ad7af1	CAATGGGCGCAAGCCTGACCCAGCAACGCCGCGTGAAGGATGAAGGCCCTCGGGTTGTAAACTTCTTTTGACAGGGACGAACATAATGACGGTACCTGTCGAATAAGCCACGGCTAACTACGTGCCAGCA	Zhou	Oscillospira	80% Study
6013f2d680276a29488635d7857b5d11	CAATGGGCGCAAGCCTGACCCAGCAACGCCGCGTGAAGGAAGAAGGCTTTCGGGTTGTAAACTTCTTTTGTCAGGGAAGATGAACGAGACTGTACCTGACGAATAAGCCACGGCTAACTACGTGCCAGCA	Zhou	Oscillospira	80% Study
547977d0c9c6af6f9dd447d354034ffe	CAATGGGCGCAAGCCTGACCCAGCAATGCCGCGTGAAGGAAGAAGGCTTTCGGGTTGTAAACTTCTTTTGTCAGGGAACAGTAGAAGAGGGTACCTGACGAATAAGCCACGGCTAACTACGTGCCAGCAG	Zhou	Oscillospira	80% Study
21ad47b9c228e03c9c11c21ed90cc31a	CAATGGGCGCAAGCCTGACCCAGCAACGCCGCGTGAAGGATGAAGGCCCTCGGGTTGTAAACTTCTTTTAACAGGGACGAATTCTGACGGTACCTGTTGAATAAGCCACGGCTAACTACGTGCCAGCAGC	Zhou	Oscillospira	80% Study
17eb0b8605d475c75233552e62d52c27	CAATGGGCGCAAGCCTGACCCAGCAACGCCGCGTGAAGGAAGAAGGCTTTCGGGTTGTAAACTTCTTTTCTCAGGGACGAAGGACGTGACGGTACCTGAGGAATAAGCTCCGGCTAACTACGTGCCAGCA	Zhou	Oscillospira	80% Study
03315a9831fe2a5a1ede573d65b6cab1	CAATGGGCGCAAGCCTGACCCAGCAACGCCGCGTGAAGGAAGAAGGCCCTCGGGTTGTAAACTTCTTTTGACAGGGACGAAGAAAATGACGGTACCTGTCGAATAAGCCACGGCTAACTACGTGCCAGCA	Zhou	Oscillospira	80% Study
b9202ee2280233384b64b1ed5fffab1a	CAATGGGCGCAAGCCTGACCCAGCAACGCCGCGTGAAGGAAGAAGGCTTTCGGGTTGTAAACTTCTTTTATTCGGGACGATCGTGACGGTACCGAATGAATAAGCCACGGCTAACTACGTGCCAGCAGCC	Zhou	Oscillospira	80% Study
b39561ed651aad55d4c8ce987e2decd1	CAATGGGCGCAAGCCTGACCCAGCAACGCCGCGTGAAGGAAGAAGGCTTTCGGGTTGTAAACTTCTTTTGTCAGGGAAGAGCAGAAGACGGTACCTGACGAATAAGCCACGGCTAACTACGTGCCAGCAG	Zhou	Oscillospira	80% Study
ea149d45edcae933d41fe6b0be6815ba	CAATGGGCGCAAGCCTGACCCAGCAACGCCGCGTGAAGGAAGAAGGCCCTCGGGTTGTAAACTTCTTTTGACAGGGACGAAACAAATGACGGTACCTGTCGAATAAGCCACGGCTAACTACGTGCCAGCA	Zhou	Oscillospira	80% Study
9f5d97ebb44ddb7807c826a607f04c4e	CAATGGGCGCAAGCCTGACCCAGCAACGCCGCGTGAAGGATGAAGGCTTTCGGGTTGTAAACTTCTTTTATCAGGGACGAAATAAATGACGGTACCTGATGAATAAGCCACGGCTAACTACGTGCCAGCA	Zhou	Oscillospira	80% Study
cf5bc79c4f3d17d649fce529bfa7731e	CAATGGGCGCAAGCCTGACCCAGCAACGCCGCGTGAAGGATGAAGGCTTTCGGGTTGTAAACTTCTTTTGTCAGGGACGAAAGAAATGACGGTACCTGACGAATAAGCCACGGCTAACTACGTGCCAGCA	Zhou	Oscillospira	80% Study
f83768ea077938894c6e7a694a17a24f	CAATGGGCGCAAGCCTGACCCAGCAACGCCGCGTGAAGGAAGAAGGCTTTCGGGTTGTAAACTTCTTTTGTCAGGGAAGAGCAGAAGACTGTACCTGACGAATAAGCCACGGCTAACTACGTGCCAGCAG	Zhou	Oscillospira	80% Study
00295649940891678c210a3d23f189f8	CAATGGGCGCAAGCCTGACCCAGCAACGCCGCGTGAAGGAAGAAGGCTTTCGGGTTGTAAACTTCTTTTCTCAGGGACGAAGCAAGTGACGGTACCTGAGGAATAAGCCACGGCTAACTACGTGCCAGCA	Zhou	Oscillospira	80% Study
1f20f8d3e09036228eb4e8d53dcab602	CAATGGGCGCAAGCCTGACCCAGCAACGCCGCGTGAAGGAAGAAGGCTTTCGGGTTGTAAACTTCTTTTATTGGGGACGAAACAAATGACGGTACCCATTGAATAAGCTCCGGCTAACTACGTGCCAGCA	Zhou	Oscillospira	80% Study
fad9d1910086f4b55363cb8df7d33a8c	CAATGGGCGCAAGCCTGACCCAGCAACGCCGCGTGAAGGATGAAGGCTTTCGGGTTGTAAACTTCTTTTGTCAGGGACGAACACAATGACGGTACCTGACGAATAAGCCACGGCTAACTACGTGCCAGCA	Zhou	Oscillospira	80% Study
[truncated: 4,115 more rows]
